# Supplementary material for: Asymmetric epoxidation of enones: effect of surfactants, radical scavengers and morphology of catalysts on reaction rates, chemical yields and enantioselectivities in phase-transfer catalysis
Source: Royal Society of Chemistry journal article supplement (doi:10.1039/d2qo00924b), 2022-01-01
Supplement: d2qo00924b1.pdf [file d2qo00924b1.pdf]

# Supporting Information

## Asymmetric Epoxidation of Enones: Effect of Surfactants, Radical Scavengers and Morphology of Catalysts on Reaction Rates, Chemical Yields and Enantioselectivities in Phase-Transfer Catalysis

Geumwoo Lee,<sup>a</sup> Jeong-Hee Lee,<sup>a</sup> Jaeyoung Lee,<sup>a</sup> Min Woo Ha,<sup>b</sup> Mi-hyun Kim,<sup>c</sup> Suckchang Hong,<sup>a</sup> and Hyeung-geun Park<sup>a,\*</sup>

<sup>a</sup>Research Institute of Pharmaceutical Sciences and College of Pharmacy, Seoul National University, 1 Gwanak-ro, Gwanak-gu, Seoul 08826, Republic of Korea.

<sup>b</sup>College of Pharmacy, Jeju National University, 102 Jejudaehak-ro Jeju 63243, Republic of Korea.

<sup>c</sup>College of Pharmacy, Gachon University, 191 Hambakmoero, Yeonsu-gu, Incheon 21936, Republic of Korea

|                                                               |     |
|---------------------------------------------------------------|-----|
| 1. General Information.....                                   | 2   |
| 2. Preparation of PTC Catalysts.....                          | 3   |
| 3. General Procedure of Enantioselective PTC Epoxidation..... | 47  |
| 4. Computational Method.....                                  | 63  |
| 5. X-ray Crystallographic Data.....                           | 69  |
| 6. References.....                                            | 72  |
| 7. <sup>1</sup> H & <sup>13</sup> C NMR Spectra.....          | 76  |
| 8. Chiral HPLC Chromatogram.....                              | 217 |

## General Information

All reagents purchased from commercial sources were used without further purification. Commercially available KOH pellet (99%) was grinded to prepare Solid KOH as powder form. 50% w/v aqueous KOH was used as stock solution. For the reactions that required heating, sand bath was used as heat source. Organic solvents were concentrated under reduced pressure using a Büchi rotary evaporator. Phase-transfer catalysts (3<sup>[1]</sup>, 4<sup>[1]</sup>, 6<sup>[3]</sup>, 7<sup>[4]</sup>, 8<sup>[4]</sup>, 9<sup>[27]</sup>) were prepared according to the reported procedure. TLC analyses were performed using pre-coated TLC plate (silica gel 60 F<sub>254</sub>, 0.25 mm). Flash column chromatography was carried out using E. Merck Silica gel 60 (0.040-0.063 mm). Hitachi (UV detector L-2130, Pump L-2130 and software LaChrome 890-8800-12) were used for HPLC. The values of enantiomeric excess (ee) of chiral products were determined by HPLC using 4.6 mm × 250 mm Daicel Chiralpak AD-H, Chiralpak ID-H, Chiralpak OD-H, Chiralpak OJ-H and Chiralcel AS-H. Nuclear magnetic resonance (<sup>1</sup>H NMR and <sup>13</sup>C NMR) spectra were measured on JEOL JNM-LA 300 [300 MHz (<sup>1</sup>H), 75 MHz (<sup>13</sup>C)] JEOL JNM-ECZ400s [400 MHz (<sup>1</sup>H), 101 MHz (<sup>13</sup>C)], Bruker AVANCE 500 [500 MHz (<sup>1</sup>H), 126 MHz (<sup>13</sup>C)] <sup>1</sup>H-NMR spectra was recorded at 400 MHz or 500 MHz with reference to CDCl<sub>3</sub> (δ 7.24), CD<sub>3</sub>OD (δ 3.31) or DMSO-*d*<sub>6</sub> (δ 2.50). <sup>13</sup>C-NMR spectra was obtained by 101 MHz or 126 MHz spectrometer relative to the central CDCl<sub>3</sub> (δ 77.0) or CD<sub>3</sub>OD (δ 49.0) or DMSO-*d*<sub>6</sub> (δ 40.0) resonance. Coupling constants (*J*) in <sup>1</sup>H-NMR are in Hz. Low-resolution mass spectra (LRMS) and high-resolution mass spectra (HRMS) were measured on JEOL JMS-700 spectrometers(double-focusing mass analyzer) or Agilent Q-TOF 6530 MS (ESI) spectrometer. Infrared (IR) spectra were recorded on JASCO FT/IR-4200 spectrometers. Optical rotations were measured on a JASCO P-2000 digital polarimeter and calibrated with pure solvent as blank. X-ray crystallographic data was collected by Agilent SuperNova X-ray Diffractometer using graphite monochromated Mo K $\alpha$  radiation.

Microscopic pictures of solid catalysts were obtained by Nikon SMZ1270 with an eye lens (C-W15X/16) and objective lens (total 90 times of magnification).

## Preparation of PTC Catalysts

### (A) General procedure for PTC catalysts

To a solution of (-)-quinine (636.4 mg, 1.96 mmol) and 1,3-bis(bromomethyl)-2-fluorobenzene (270 mg, 0.96 mmol) in a mixture of ethanol (7.6 mL), DMF (9.0 mL) and chloroform (3.0 mL) was stirred for overnight at rt. The resulting solution was poured into diethylether (100 mL) for solidification. The solid was filtered and washed with diethylether. The precipitate was dissolved into MeOH/CH<sub>3</sub>Cl (1 : 1) and dried *in vacuo* to afford 1,3-bis(quininium-N-methyl)-2-fluorobenzene dibromide(**13**, 861.0 mg, 0.925 mmol, 97%) as ivory solid.

### (B) General procedure for anion exchange of PTC catalysts

Preparation of anion exchanged PTC was performed by anion exchange of **13** according to the literature<sup>[5]</sup>. To a solution of **13** (100 mg, 0.107 mmol) in MeOH (1 mL) was added Amberlyst A-26 (OH<sup>-</sup>)resin(about 100 mg). The mixture was stirred for 30min and filtered to remove the resin. To the filtrate was added acids (1 N aq. solution, 1 mL) and stirred for 30min. The mixture was basified with NH<sub>4</sub>OH aq. solution, extracted with dichloromethane twice, washed with water, dried over Na<sub>2</sub>SO<sub>4</sub>, filtered and concentrated to afford anion exchanged PTC as fine solid. Obtained PTC was re-dissolved into MeOH/CH<sub>3</sub>Cl (1 : 1)and evaporated *in vacuo*.

### N-2,3,4-Trifluorobenzyl quininium bromide (**5**)

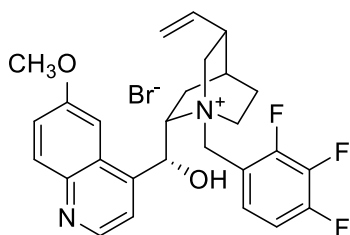

A mixture of quinine (1.00 g, 3.37 mmol) with 2,3,4-Trifluorobenzyl bromide (834 mg, 3.71 mmol) in a mixture of ethanol (2.3 mL), DMF (2.7 mL), and chloroform (1 mL) was stirred at 100 °C for 4 h. After cooling the reaction mixture to room temperature, the resulting suspension was diluted with methanol (5 mL) and ether (100 mL) and stirred for 1 h. The solids were filtered, washed with ether. The crude solid was recrystallized from methanol-ether to afford 1.67 g (95% yield) of desired product.

Light yellow solid; mp 158 °C (MeOH-Et<sub>2</sub>O, decomp.); <sup>1</sup>H NMR (300 MHz, DMSO- *d*<sub>6</sub>) δ 8.80 (d, *J* = 4.4 Hz, 1 H), 8.01 (d, *J* = 9.2 Hz, 1 H), 7.75-7.72 (m, 2 H), 7.61-7.56 (m, 1 H), 7.49 (dd, *J* = 9.1, 2.3 Hz, 1 H), 7.38 (d, *J* = 2.4 Hz, 1 H), 6.75 (d, *J* = 3.7 Hz, 1 H), 6.55 (s, 1H), 5.80-5.69 (m, 1 H), 5.51 (d, *J* = 12.7 Hz, 1 H), 5.14-4.99 (m, 2H), 4.75 (d, *J* = 12.9 Hz, 1 H), 4.24-4.21(m, 1 H), 4.00 (s, 3 H), 3.98-3.96 (m, 1 H), 3.76-3.67 (m, 1 H), 3.50-3.36 (m, 1 H), 2.70-2.65 (m, 1 H), 2.20-2.15 (m, 2 H), 2.00 (s, 1 H), 1.81-1.77 (m, 1 H), 1.46-1.38 (m, 1 H) ppm; <sup>13</sup>C NMR (75MHz, DMSO-*d*<sub>6</sub>) δ 157.4, 147.4, 143.7, 137.9, 131.4, 131.3, 125.4, 121.5, 120.3, 116.7, 113.7, 102.2, 68.3, 63.8, 59.1, 56.4, 55.6, 50.9, 37.3, 25.8, 24.4, 20.4 ppm; IR (KBr) 3433, 1621, 1515, 1493, 1311, 1241, 1029, 827, 587 cm<sup>-1</sup>; [α]<sub>D</sub><sup>20</sup> = -199.0 (c 1.00, CH<sub>3</sub>OH); MS (FAB): 469 [M-Br]<sup>+</sup>; HRMS (FAB) calcd for [C<sub>27</sub>H<sub>28</sub>F<sub>3</sub>N<sub>2</sub>O<sub>2</sub>]<sup>+</sup>: 469.2097, found: 469.2123.

### 1,3-Bis(quininium-*N*-methyl)benzene dibromide (10)



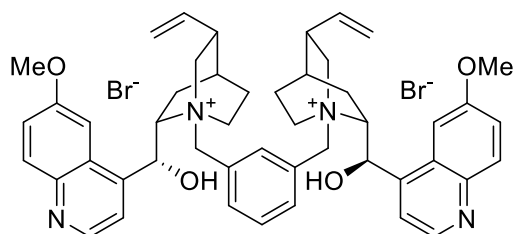

According to the procedure (A), from quinine(300mg, 0.925mmol) and 1,3-bis(bromomethyl)benzene (119.1mg, 0.451mmol), the compound **9** was obtained (402.7mg, 0.441mmol, 98%).

Pink solid; mp 213 °C (MeOH-Et<sub>2</sub>O, decomp.); <sup>1</sup>H-NMR (300 MHz, DMSO-*d*<sub>6</sub>) δ 8.82 (d, *J* = 4.7 Hz, 2H), 8.03 (d, *J* = 9.3 Hz, 2H), 7.94-7.71 (m, 5H), 7.52-7.39 (m, 4H), 6.69 (d, *J* = 3.7 Hz, 2H), 6.61 (s, 2H), 5.82-5.71 (m, 2H), 5.52 (d, *J* = 12.2 Hz, 2H), 5.12-4.99 (m, 4H), 4.74 (d, *J* = 12.0 Hz, 2H), 4.24-4.15 (m, 2H), 4.01 (s, 6H), 3.99-3.86 (m, 2H), 3.66-3.62 (m, 2H), 3.55-3.47 (m, 2H), 3.34-3.30 (m, 2H), 2.73-2.70 (m, 2H), 2.24-2.02 (m, 6H), 1.51-1.44 (m, 2H); <sup>13</sup>C-NMR (75 MHz, MeOH-*d*<sub>6</sub>) δ 160.8, 149.0, 146.9, 145.6, 141.2, 139.5, 137.7, 132.6, 130.7, 128.2, 124.3, 122.5, 118.5, 103.3, 71.3, 66.6, 65.6, 62.5, 57.7, 53.7, 39.9, 29.0, 26.6, 22.9; IR (KBr) 3854, 3735, 3420, 1621, 1509, 1473, 1361, 1240, 1026 cm<sup>-1</sup>; [α]<sup>20</sup><sub>D</sub> = -202 (c 0.10, MeOH); MS (FAB): 831 [M-Br]<sup>+</sup>; HRMS (FAB) calcd for [C<sub>48</sub>H<sub>56</sub>BrN<sub>4</sub>O<sub>4</sub>]<sup>+</sup>: 831.3479, found: 831.3511.

### 2,7-Bis(quininium-*N*-methyl)-naphthalene dibromide (11)

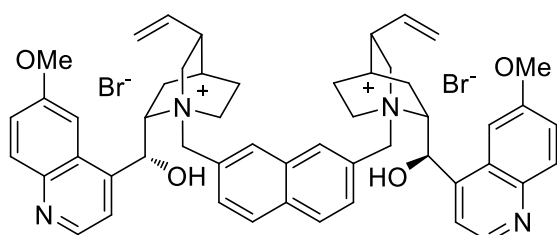

According to the procedure (A), from quinine (176.6 mg, 0.544 mmol) and 2,7-bis(bromomethyl)naphthalene (83.4 mg, 0.266 mmol), the compound **11** was obtained (240.0 mg, 0.249 mmol, 94%).

White solid; mp 204-205 °C (MeOH-Et<sub>2</sub>O, decomp.); <sup>1</sup>H-NMR (400 MHz, CD<sub>3</sub>OD) δ 8.79 (d, *J* = 4.6 Hz, 2H), 8.49 (s, 2H), 8.17 (d, *J* = 8.7 Hz, 2H), 8.04 (d, *J* = 9.6 Hz, 2H), 7.93 (d, *J* = 4.6 Hz, 2H), 7.90 (dd, *J* = 8.7, 1.4 Hz, 2H), 7.53 (dd, *J* = 9.1, 2.3 Hz, 2H), 7.49 (d, *J* = 2.3 Hz, 2H), 6.76 (s, 2H), 5.82-5.73 (m, 2H), 5.64 (d, *J* = 12.3 Hz, 2H), 5.17 (d, *J* = 17.4 Hz, 2H), 5.06 (d, *J* = 10.5 Hz, 2H), 5.02 (d, *J* = 12.3 Hz, 2H), 4.56-4.50 (m, 2H), 4.08 (s, 6H), 4.04-3.99 (m, 2H), 3.79-3.74 (m, 2H), 3.64-3.59 (m, 2H), 3.49-3.46 (m, 2H), 2.73-2.71 (m, 2H), 2.46-2.36 (m, 4H), 2.15-2.10 (m, 2H), 1.93-1.88 (m, 2H), 1.64-1.58 (m, 2H) ppm; <sup>13</sup>C-NMR (101 MHz, CD<sub>3</sub>OD) δ 160.1, 148.3, 146.1, 144.8, 138.7, 136.1, 135.7, 134.2, 132.7, 131.9, 130.1, 127.4, 127.3, 123.3, 121.7, 117.7, 102.6, 70.3, 66.0, 65.5, 62.0, 56.6, 53.1, 39.3, 28.2, 25.9, 22.1 ppm; IR (neat) 3394, 1620, 1509, 1241, 1032 cm<sup>-1</sup>; HRMS (FAB) *m/z*: [M - Br]<sup>+</sup> calcd for [C<sub>52</sub>H<sub>58</sub>BrN<sub>4</sub>O<sub>4</sub>]<sup>+</sup> 881.3641; found 881.3628. [α]<sub>D</sub><sup>20</sup> = -56.67 (*c* 1.0, MeOH).

### 1,3-Bis[O(9)-allylquininium-N-methyl]-2-fluorobenzene dibromide (**12**)

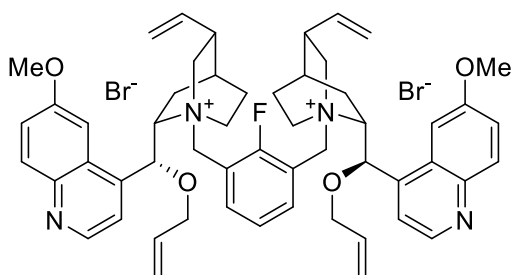

According to the procedure (A), the compound **12** was obtained (210.9 mg, 0.209 mmol, 91%).

Pink solid; mp 186 °C (CH<sub>2</sub>Cl<sub>2</sub>-Hexanes, decomp.); <sup>1</sup>H-NMR (300 MHz, DMSO-*d*<sub>6</sub>) δ 8.84 (d,

$J = 4.4$  Hz, 2H), 8.07-8.02 (m, 4H), 7.66-7.39 (m, 7H), 6.52 (s, 2H), 6.16-6.07 (m, 2H), 5.84-5.72 (m, 4H), 5.46 (d,  $J = 17.3$  Hz, 2H), 5.27 (d,  $J = 10.5$  Hz, 2H), 5.11-5.02 (m, 6H), 4.76 (d,  $J = 12.5$  Hz, 2H), 4.35-4.32 (m, 2H), 4.06-4.04 (m, 4H), 3.99 (s, 6H), 3.68-3.65 (m, 4H), 3.52-3.45 (m, 2H), 2.82-2.78 (m, 2H), 2.35-2.32 (m, 2H), 2.14-2.05 (m, 4H), 1.87-1.84 (m, 2H), 1.56-1.53 (m, 2H);  $^{13}\text{C-NMR}$  (75 MHz,  $\text{CDCl}_3$ )  $\delta$  163.3, 16.0, 158.5, 147.0, 144.6, 139.0, 136.9, 133.0, 131.7, 126.8, 125.6, 124.8, 122.2, 118.4, 116.0, 115.8, 101.4, 70.0, 68.6, 60.4, 56.5, 51.5, 49.3, 36.8, 26.3, 24.6, 22.2; IR (KBr) 3394, 2933, 1620, 1509, 1474, 1430, 1240, 1069, 1024, 926, 861, 828, 751, 663, 553, 465, 431, 404  $\text{cm}^{-1}$ ;  $[\alpha]_{\text{D}}^{20} = -110$  (c 0.18,  $\text{CHCl}_3$ ); MS (FAB): 929  $[\text{M-Br}]^+$ ; HRMS (FAB) calcd for  $[\text{C}_{54}\text{H}_{63}\text{BrFN}_4\text{O}_4]^+$ : 929.4011, found: 929.4089.

### 1,3-Bis(quininium-*N*-methyl)-2-fluorobenzene dibromide (**13**)

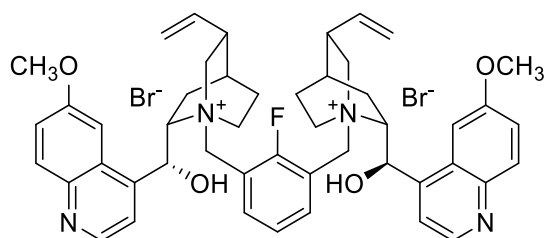

According to the procedure (A), the compound **13** was obtained (861.0 mg, 0.925 mmol, 97%).

Ivory solid; mp 208-209 °C (MeOH-Et<sub>2</sub>O, decomp.);  $^1\text{H-NMR}$  (400 MHz,  $\text{DMSO-}d_6$ )  $\delta$  8.82 (d,  $J = 4.6$  Hz, 2H), 8.05-8.02 (m, 4H), 7.76 (d,  $J = 4.1$  Hz, 2H), 7.61 (t,  $J = 7.6$  Hz, 1H), 7.50 (dd,  $J = 9.2, 2.8$  Hz, 2H), 7.42 (d,  $J = 2.3$  Hz, 2H), 6.91 (s, 2H), 6.59 (s, 2H), 5.85-5.76 (m, 2H), 5.59 (d,  $J = 12.8$  Hz, 2H), 5.11 (d,  $J = 17.4$  Hz, 2H), 5.03 (d,  $J = 10.5$  Hz, 2H), 4.77 (d,  $J = 12.8$  Hz, 2H), 4.24-4.24 (m, 2H), 4.06-4.01 (m, 2H), 4.00 (s, 6H), 3.66-3.63 (m, 4H), 3.39-3.37 (m, 2H), 2.76-2.74 (m, 2H), 2.24-2.08 (m, 4H), 2.03-2.02 (m, 2H), 1.83-1.82 (m, 2H),

1.49-1.46 (m, 2H) ppm;  $^{13}\text{C}$ -NMR (101 MHz,  $\text{CD}_3\text{OD}$ )  $\delta$  163.5, 158.7, 146.9, 144.6, 143.5, 138.7, 137.4, 130.5, 126.2, 122.0, 120.2, 116.6, 116.4, 116.3, 101.4, 68.9, 64.9, 60.7, 57.8, 55.3, 51.9, 48.3, 48.1, 47.9, 47.7, 47.5, 47.2, 47.0, 38.1, 26.7, 24.6, 21.0 ppm; IR (neat) 3230, 1620, 1509, 1240, 1032  $\text{cm}^{-1}$ ; HRMS (FAB)  $m/z$ :  $[\text{M} - \text{Br}]^+$  calcd for  $[\text{C}_{48}\text{H}_{55}\text{BrFN}_4\text{O}_4]^+$  849.3391; found 849.3394.  $[\alpha]_D^{20} = -28.90$  ( $c$  1.0, MeOH).

### 1,3-Bis(9-*epi*-quinidinium-*N*-methyl)-2-fluorobenzene dibromide (C(9)(*S*)-*epi*-13)

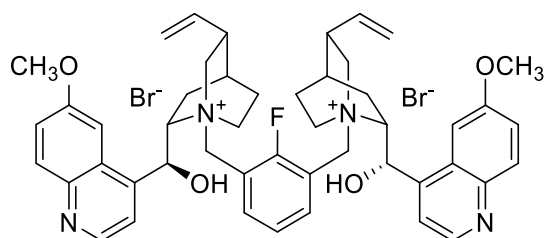

According to the procedure (A), the compound **C(9)(*S*)-*epi*-13** was obtained (501.5 mg, 0.539 mmol, 96%).

pink solid; mp 180 °C (MeOH-Et<sub>2</sub>O, decomp.);  $^1\text{H}$ -NMR (400 MHz,  $\text{DMSO}-d_6$ )  $\delta$  9.57 (d,  $J = 4.4$  Hz, 2H), 8.90 (t,  $J = 7.2$  Hz, 2H), 8.77-8.70 (m, 2H), 8.57-8.23 (m, 7H), 7.72 (d,  $J = 3.6$  Hz, 2H), 6.84 (s, 2H), 6.62-6.54 (m, 2H), 6.20-6.16 (m, 2H), 5.95-5.80 (m, 4H), 5.44-5.43 (m, 2H), 5.16-5.14 (m, 2H), 4.80-4.74 (m, 4H), 4.61-4.45 (m, 6H), 4.16 (s, 6H), 3.60-3.57 (m, 2H), 2.84-2.65 (m, 6H), 1.80-1.76 (m, 2H);  $^{13}\text{C}$  NMR (101MHz,  $\text{DMSO}-d_6$ )  $\delta$  157.7, 147.8, 144.6, 144.3, 138.3, 137.3, 131.5, 121.8, 117.1, 116.9, 116.8, 102.8, 69.1, 59.1, 58.9, 56.1, 48.8, 36.9, 36.4, 35.8, 25.6, 25.0, 24.2 IR (KBr) 3396, 2944, 1620, 1509, 1472, 1242, 1029, 853, 754  $\text{cm}^{-1}$ ;  $[\alpha]_D^{20} = 6.9^\circ$  ( $c$  0.10, MeOH :  $\text{CH}_2\text{Cl}_2 = 1 : 1$ ); MS (FAB): 849  $[\text{M}-\text{Br}]^+$ ; HRMS (FAB) calcd for  $[\text{C}_{48}\text{H}_{55}\text{BrFN}_4\text{O}_4]^+$ : 849.3391, found: 849.3394.

### 1,3-Bis(quininium-*N*-methyl)-2-chlorobenzene dibromide (**14**)

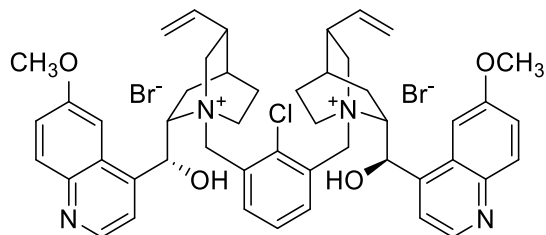

According to the procedure (**A**), from quinine (342.5 mg, 1.056 mmol) and 1,3-bis(bromomethyl)-2-chlorobenzene (150 mg 0.503 mmol), the compound **14** was obtained (471.1 mg, 0.497 mmol, 99%).

White solid; mp 192-193 °C (MeOH-Et<sub>2</sub>O, decomp.); <sup>1</sup>H-NMR (400 MHz, CD<sub>3</sub>OD) δ 8.76 (d, *J* = 4.6 Hz, 2H), 8.09 (d, *J* = 7.8 Hz, 2H), 8.01 (d, *J* = 9.2 Hz, 2H), 7.90 (d, *J* = 4.6 Hz, 2H), 7.72 (t, *J* = 7.8 Hz, 1H), 7.50 (dd, *J* = 9.4, 2.5 Hz, 2H), 7.43 (d, *J* = 2.3 Hz, 2H), 6.69 (s, 2H), 5.79-5.69 (m, 4H), 5.16-5.00 (m, 6H), 4.56-4.50 (m, 4H), 4.05 (s, 6H), 4.00-3.93 (m, 2H), 3.73-3.69 (m, 2H), 3.63-3.61 (m, 2H), 2.87-2.86 (m, 2H), 2.35-2.24 (m, 4H), 2.07-2.06 (m, 2H), 1.98-1.97 (m, 2H), 1.54-1.51 (m, 2H) ppm; <sup>13</sup>C-NMR (101 MHz, CD<sub>3</sub>OD) δ 158.7, 147.0, 144.7, 143.4, 139.9, 138.8, 137.5, 130.6, 128.2, 127.9, 126.0, 122.0, 120.3, 116.3, 101.1, 69.3, 65.0, 61.7, 60.8, 55.3, 51.9, 38.0, 26.5, 24.7, 21.1 ppm; IR (neat) 3365, 1621, 1509, 1240, 1032, 827 cm<sup>-1</sup>; HRMS (FAB) *m/z*: [M - Br]<sup>+</sup> calcd for [C<sub>48</sub>H<sub>55</sub>BrClN<sub>4</sub>O<sub>4</sub>]<sup>+</sup> 865.3095; found 865.3074. [α]<sub>D</sub><sup>20</sup> = -54.95 (*c* 1.0, MeOH).

### 1,3-Bis(quininium-*N*-methyl)-2-bromobenzene dibromide (**15**)

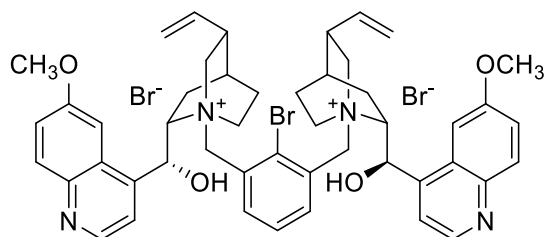

According to the procedure (A), from quinine (397.4 mg, 1.225 mmol) and 2-bromo-1,3-bis(bromomethyl)benzene (200 mg 0.583 mmol), the compound **15** was obtained (548.7 mg, 0.553 mmol, 95%).

Ivory solid; mp 186-187 °C (MeOH-Et<sub>2</sub>O, decomp.); <sup>1</sup>H-NMR (400 MHz, CD<sub>3</sub>OD) δ 8.81 (d, *J* = 4.6 Hz, 2H), 8.13 (d, *J* = 7.8 Hz, 2H), 8.07 (d, *J* = 9.2 Hz, 2H), 7.96 (d, *J* = 4.6 Hz, 2H), 7.81 (t, *J* = 7.8 Hz, 1H), 7.55 (dd, *J* = 9.2, 2.3 Hz, 2H), 7.48 (d, *J* = 2.8 Hz, 2H), 6.73 (s, 2H), 5.84-5.75 (m, 4H), 5.19 (d, *J* = 17.0 Hz, 2H), 5.14-5.06 (m, 4H), 4.67-4.61 (m, 2H), 4.12-4.08 (m, 8H), 4.02-3.97 (m, 2H), 3.82-3.78 (m, 2H), 3.68-3.67 (m, 2H), 2.95-2.91 (m, 2H), 2.40-2.29 (m, 4H), 2.12-2.03 (m, 4H), 1.55-1.54 (m, 2H) ppm; <sup>13</sup>C-NMR (101 MHz, CD<sub>3</sub>OD) δ 158.8, 147.0, 144.7, 143.4, 138.7, 137.5, 133.6, 130.6, 129.9, 128.8, 126.0, 122.0, 120.3, 116.2, 101.1, 69.4, 65.0, 64.4, 60.9, 55.3, 52.0, 38.0, 26.4, 24.7, 21.2 ppm; IR (neat) 3365, 1621, 1509, 1240, 1032 cm<sup>-1</sup>; HRMS (FAB) *m/z*: [M - Br]<sup>+</sup> calcd for [C<sub>48</sub>H<sub>55</sub>Br<sub>2</sub>N<sub>4</sub>O<sub>4</sub>]<sup>+</sup> 829.3328; found 829.3309. [α]<sub>D</sub><sup>20</sup> = -46.83 (*c* 1.0, MeOH).

### 1,3-Bis(bromomethyl)-2,4,5,6-tetrafluorobenzene (S1)

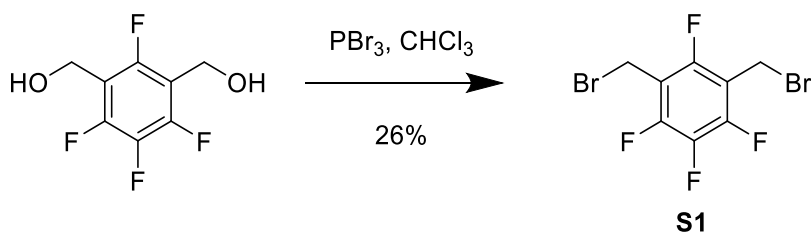

To a solution of (perfluoro-1,3-phenylene)dimethanol<sup>[6]</sup> (100 mg, 0.476 mmol) in chloroform was added PBr<sub>3</sub> (1 M in DCM, 0.952 mL, 0.952 mmol) slowly and stirred at rt for 3h. The resulting mixture was quenched with water, extracted with dichloromethane, washed with brine, dried over MgSO<sub>4</sub>, filtered and concentrated. The crude was purified by column chromatography (silica gel, Hexane : DCM = 100:0 to 99:1) to afford **S1** (42.1 mg, 0.125 mmol, 26%).

Clear oil; <sup>1</sup>H-NMR (400 MHz, CDCl<sub>3</sub>) δ 4.43-4.48 (4H) ppm; <sup>13</sup>C-NMR (101 MHz, CDCl<sub>3</sub>) δ 112.3, 112.1, 16.4 ppm; <sup>19</sup>F-NMR (376 MHz, CDCl<sub>3</sub>) δ -121.73 (d, *J* = 11.6 Hz, 1F), -133.88 (d, *J* = 23.1 Hz, 2F), -162.70 (td, *J* = 21.7, 11.6 Hz, 1F); IR (neat) 1499, 1107, 772 cm<sup>-1</sup>

### 1,3-Bis(quininium-*N*-methyl)-2,4,5,6-tetrafluorobenzene dibromide (**16**)

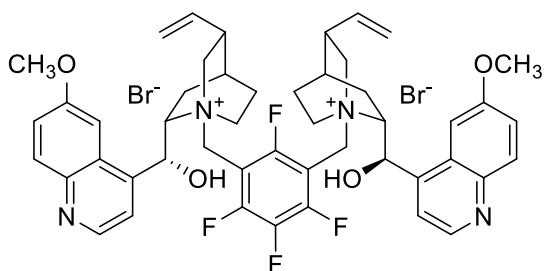

According to the procedure (**A**), from quinine (77.6 mg, 0.239 mmol) and **S1** (39.2 mg 0.117 mmol), the compound **16** was obtained (76.2 mg, 0.774 mmol, 66%).

White solid; mp 193-194 °C (MeOH-Et<sub>2</sub>O, decomp.); <sup>1</sup>H-NMR (400 MHz, CD<sub>3</sub>OD) δ 8.78 (d, *J* = 4.6 Hz, 2H), 8.04 (d, *J* = 9.6 Hz, 2H), 7.88 (d, *J* = 4.6 Hz, 2H), 7.53 (dd, *J* = 9.2, 2.8 Hz, 2H), 7.48-7.44 (m, 2H), 6.65 (s, 2H), 5.84-5.76 (m, 2H), 5.50 (d, *J* = 13.3 Hz, 2H), 5.16 (d, *J* = 17.0 Hz, 2H), 5.07 (d, *J* = 10.5 Hz, 2H), 4.62-4.62 (m, 4H), 4.34-4.30 (m, 2H), 4.13-4.09 (m, 2H), 4.07 (s, 6H), 3.76-3.70 (m, 2H), 3.62-3.60 (m, 2H), 2.96-2.90 (m, 2H), 2.37-2.27 (m, 4H), 2.12-2.01 (m, 4H), 1.61-1.60 (m, 2H) ppm; <sup>13</sup>C-NMR (101 MHz, CD<sub>3</sub>OD) δ 159.6, 147.8,

145.2, 144.3, 138.1, 131.3, 126.9, 122.8, 121.1, 117.3, 102.2, 69.9, 65.9, 61.8, 56.2, 53.3, 52.9, 39.0, 27.1, 25.5, 21.9 ppm; IR (neat) 3375, 1621, 1506, 1241, 1031  $\text{cm}^{-1}$ ; HRMS (FAB)  $m/z$ :  $[\text{M} - \text{Br}]^+$  calcd for  $[\text{C}_{48}\text{H}_{52}\text{BrF}_4\text{N}_4\text{O}_4]^+$  903.3108; found 903.3100.  $[\alpha]_{\text{D}}^{20} = -43.95$  ( $c$  1.0, MeOH).

### 1,3-Bis(quininium-*N*-methyl)-2-nitrobenzene dibromide (**17**)

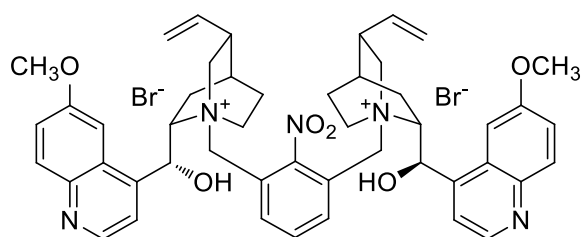

According to the procedure (A), from quinine (107.6 mg, 0.332 mmol) and 1,3-bis(bromomethyl)-2-nitrobenzene (50 mg, 0.162 mmol), the compound **17** was obtained (120.3 mg, 0.126 mmol, 78%).

Ivory solid; mp 188-189  $^{\circ}\text{C}$  (MeOH-Et<sub>2</sub>O, decomp.); <sup>1</sup>H-NMR (400 MHz, CD<sub>3</sub>OD)  $\delta$  8.78 (d,  $J = 4.6$  Hz, 2H), 8.32 (d,  $J = 8.3$  Hz, 2H), 8.06-8.02 (m, 3H), 7.91 (d,  $J = 4.6$  Hz, 2H), 7.52 (dd,  $J = 9.2, 2.8$  Hz, 2H), 7.37 (d,  $J = 2.8$  Hz, 2H), 6.62 (s, 2H), 5.80-5.71 (m, 2H), 5.65 (d,  $J = 13.8$  Hz, 2H), 5.18 (d,  $J = 17.0$  Hz, 2H), 5.07 (d,  $J = 10.1$  Hz, 2H), 4.92-4.90 (m, 2H), 4.46-4.41 (m, 2H), 4.09 (s, 6H), 4.05-4.00 (m, 2H), 3.94-3.88 (m, 2H), 3.67-3.59 (m, 4H), 2.88-2.80 (m, 2H), 2.33-2.26 (m, 4H), 2.11-2.10 (m, 2H), 2.04-2.01 (m, 2H), 1.51-1.45 (m, 2H) ppm; <sup>13</sup>C-NMR (101 MHz, CD<sub>3</sub>OD)  $\delta$  160.2, 156.4, 148.3, 145.7, 144.8, 140.2, 138.6, 133.6, 131.9, 127.4, 123.6, 122.5, 121.7, 117.7, 102.2, 70.9, 66.4, 62.6, 60.7, 56.7, 53.8, 39.3, 27.7, 26.0, 22.6 ppm; IR (neat) 1536, 1471, 1358, 1240, 1024  $\text{cm}^{-1}$ ; HRMS (FAB)  $m/z$ :  $[\text{M} - \text{Br}]^+$  calcd for  $[\text{C}_{48}\text{H}_{55}\text{BrN}_5\text{O}_6]^+$  876.3336; found 876.3351.  $[\alpha]_{\text{D}}^{20} = -49.87$  ( $c$  1.0, MeOH).



### 1,3-Bis(quininium-*N*-methyl)-5-fluorobenzene dibromide (**18**)

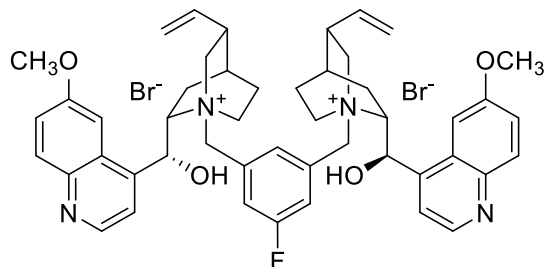

According to the procedure (A), from quinine (147.4 mg, 0.454 mmol) and 1,3-bis(bromomethyl)-5-fluorobenzene (62.5 mg, 0.222 mmol), the compound **18** was obtained (198.1 mg, 0.213 mmol, 96%).

Ivory solid; mp 214-215 °C (MeOH-Et<sub>2</sub>O, decomp.); <sup>1</sup>H-NMR (400 MHz, CD<sub>3</sub>OD) δ 8.77 (d, *J* = 4.6 Hz, 2H), 8.14 (s, 1H), 8.03 (d, *J* = 9.6 Hz, 2H), 7.90 (d, *J* = 4.6 Hz, 2H), 7.74-7.71 (m, 2H), 7.52 (dd, *J* = 9.4, 2.5 Hz, 2H), 7.44 (d, *J* = 2.3 Hz, 2H), 6.68 (s, 2H), 5.82-5.74 (m, 2H), 5.58 (d, *J* = 12.8 Hz, 2H), 5.21 (d, *J* = 17.0 Hz, 2H), 5.07 (d, *J* = 10.5 Hz, 2H), 4.63-4.60 (m, 2H), 4.46-4.40 (m, 2H), 4.08 (s, 6H), 3.99-3.94 (m, 2H), 3.86-3.80 (m, 2H), 3.74-3.70 (m, 2H), 3.62-3.55 (m, 2H), 2.87-2.80 (m, 2H), 2.42-2.37 (m, 2H), 2.31-2.30 (m, 2H), 2.11-2.10 (m, 2H), 2.00-1.95 (m, 2H), 1.63-1.57 (m, 2H) ppm; <sup>13</sup>C-NMR (101 MHz, CD<sub>3</sub>OD) δ 160.1, 148.2, 146.0, 144.7, 138.6, 132.1, 132.0, 131.8, 127.4, 124.0, 123.8, 123.3, 121.7, 117.7, 102.6, 70.6, 65.9, 64.3, 61.9, 56.8, 53.1, 39.2, 28.1, 25.8, 22.1 ppm; IR (neat) 3382, 1620, 1509, 1240, 1024 cm<sup>-1</sup>; HRMS (FAB) *m/z*: [M - Br]<sup>+</sup> calcd for [C<sub>48</sub>H<sub>55</sub>BrFN<sub>4</sub>O<sub>4</sub>]<sup>+</sup> 849.3391; found 849.3405. [α]<sub>D</sub><sup>20</sup> = -46.92 (*c* 1.0, MeOH).

### 1,3-Bis(quininium-*N*-methyl)-5-bromobenzene dibromide (**19**)

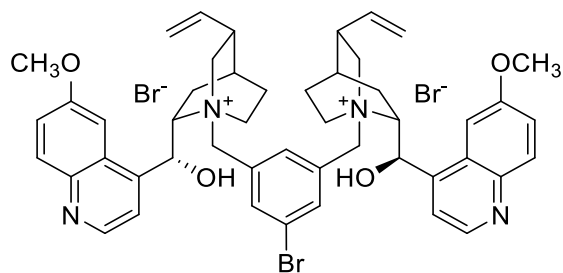

According to the procedure (A), from quinine (48.5 mg, 0.150 mmol) and 1,3-bis(bromomethyl)-5-bromobenzene (25 mg, 0.073 mmol), the compound **19** was obtained (70.3 mg, 0.071 mmol, 97%).

Ivory solid; mp 201-202 °C (MeOH-Et<sub>2</sub>O, decomp.); <sup>1</sup>H-NMR (400 MHz, CD<sub>3</sub>OD) δ 8.77 (d, *J* = 5.0 Hz, 2H), 8.29 (s, 1H), 8.10 (d, *J* = 0.9 Hz, 2H), 8.03 (d, *J* = 9.6 Hz, 2H), 7.90 (d, *J* = 4.6 Hz, 2H), 7.52 (dd, *J* = 9.4, 2.5 Hz, 2H), 7.44 (d, *J* = 2.3 Hz, 2H), 6.67 (s, 2H), 5.83-5.74 (m, 2H), 5.56 (d, *J* = 12.4 Hz, 2H), 5.20 (d, *J* = 17.4 Hz, 2H), 5.07 (d, *J* = 10.5 Hz, 2H), 4.87-4.80 (m, 2H), 4.47-4.42 (m, 2H), 4.07 (s, 6H), 3.98-3.90 (m, 2H), 3.82-3.76 (m, 2H), 3.72-3.68 (m, 2H), 3.57-3.50 (m, 2H), 2.86-2.84 (m, 2H), 2.42-2.37 (m, 2H), 2.34-2.31 (m, 2H), 2.10-2.00 (m, 2H), 1.99-1.94 (m, 2H), 1.64-1.58 (m, 2H) ppm; <sup>13</sup>C-NMR (101 MHz, CD<sub>3</sub>OD) δ 158.8, 146.9, 144.7, 143.5, 138.2, 137.9, 137.3, 130.7, 130.5, 126.1, 123.5, 121.9, 120.3, 116.4, 101.3, 69.2, 64.6, 62.8, 60.6, 55.4, 51.7, 37.9, 26.9, 24.5, 20.8 ppm; IR (neat) 1620, 1509, 1240, 1031, 719 cm<sup>-1</sup>; HRMS (FAB) *m/z*: [M - Br]<sup>+</sup> calcd for [C<sub>48</sub>H<sub>55</sub>Br<sub>2</sub>N<sub>4</sub>O<sub>4</sub>]<sup>+</sup> 909.2615; found 909.2590. [α]<sub>D</sub><sup>20</sup> = -46.85 (*c* 1.0, MeOH).

### 1,3-Bis(quininium-*N*-methyl)-5-methylbenzene dibromide (**20**)

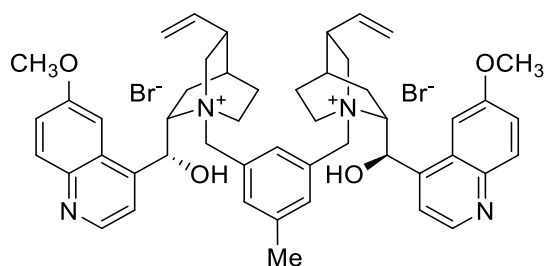

According to the procedure (A), from quinine (59.8 mg, 0.1844 mmol) and 1,3-bis(bromomethyl)-5-bromobenzene (25 mg, 0.090 mmol), the compound **20** was obtained (78.5 mg, 0.085 mmol, 94%)

White solid; mp 208-209 °C (MeOH- Et<sub>2</sub>O, decomp.); <sup>1</sup>H-NMR (400 MHz, CD<sub>3</sub>OD) δ 8.77 (d, *J* = 4.6 Hz, 2H), 8.04-8.02 (m, 3H), 7.90 (d, *J* = 4.6 Hz, 2H), 7.66 (s, 2H), 7.52 (dd, *J* = 9.2, 2.3 Hz, 2H), 7.45 (d, *J* = 2.8 Hz, 2H), 6.69 (s, 2H), 5.83-5.75 (m, 2H), 5.52 (d, *J* = 12.4 Hz, 2H), 5.20 (d, *J* = 17.0 Hz, 2H), 5.06 (d, *J* = 10.5 Hz, 2H), 4.85 (d, *J* = 12.4 Hz, 2H), 4.44-4.38 (m, 2H), 4.07 (s, 6H), 3.99-3.94 (m, 2H), 3.79-3.74 (m, 2H), 3.69-3.65 (m, 2H), 3.55-3.51 (m, 2H), 2.84-2.80 (m, 2H), 2.48 (s, 3H), 2.42-2.38 (m, 2H), 2.32-2.30 (m, 2H), 2.10-2.09 (m, 2H), 1.98-1.96 (m, 2H), 1.65-1.59 (m, 2H) ppm; <sup>13</sup>C-NMR (101 MHz, CD<sub>3</sub>OD) δ 160.0, 148.2, 146.1, 144.7, 141.9, 138.7, 137.4, 137.2, 131.8, 129.7, 127.4, 123.3, 121.6, 117.6, 102.5, 70.3, 65.8, 64.9, 61.8, 56.6, 52.9, 39.2, 28.2, 25.8, 22.0, 21.2 ppm; IR (neat) 2948, 1620, 1509, 1240, 1054 cm<sup>-1</sup>; HRMS (FAB) *m/z*: [M - Br]<sup>+</sup> calcd for [C<sub>49</sub>H<sub>58</sub>BrN<sub>4</sub>O<sub>4</sub>]<sup>+</sup> 845.3641; found 845.3632. [α]<sub>D</sub><sup>20</sup> = -46.70 (*c* 1.0, MeOH).

### 1,3-Bis(quininium-*N*-methyl)-pyridine dibromide (21)

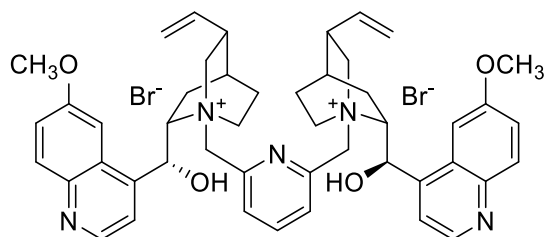

According to the procedure (A), from quinine (88.5 mg, 0.273 mmol) and 2,6-bis(bromomethyl)pyridine (34.4 mg 0.130 mmol), the compound **21** was obtained (101.9 mg, 0.112 mmol, 86%).

Yellow solid; mp 223-224 °C (MeOH- Et<sub>2</sub>O, decomp.); <sup>1</sup>H-NMR (400 MHz, DMSO-*d*<sub>6</sub>) δ 9.64 (d, *J* = 4.6 Hz, 2H), 9.06 (t, *J* = 7.8 Hz, 1H), 8.88 (d, *J* = 7.8 Hz, 2H), 8.85 (d, *J* = 9.2 Hz, 2H), 8.59 (d, *J* = 4.6 Hz, 2H), 8.34 (dd, *J* = 9.2, 2.8 Hz, 2H), 8.25 (d, *J* = 2.8 Hz, 2H), 7.91 (s, 2H), 7.43 (s, 2H), 6.65-6.56 (m, 2H), 6.43 (d, *J* = 12.4 Hz, 2H), 5.92 (d, *J* = 17.4 Hz, 2H), 5.84 (d, *J* = 10.5 Hz, 2H), 5.67 (d, *J* = 12.4 Hz, 2H), 5.13-5.10 (m, 2H), 4.86 (s, 6H), 4.82-4.77 (m, 2H), 4.68-4.62 (m, 2H), 4.54-4.53 (m, 2H), 4.18-4.13 (m, 2H), 3.60-3.58 (m, 2H), 3.08-3.07 (m, 2H), 2.97-2.96 (m, 2H), 2.85-2.81 (m, 2H), 2.67-2.64 (m, 2H), 2.34-2.31 (m, 2H) ppm; <sup>13</sup>C-NMR (101 MHz, DMSO-*d*<sub>6</sub>) δ 157.9, 150.1, 148.0, 144.5, 144.2, 139.7, 138.6, 132.0, 130.0, 126.0, 121.8, 120.9, 117.1, 103.0, 69.1, 64.4, 64.3, 60.2, 56.2, 51.8, 37.9, 26.5, 24.9, 20.9 ppm; IR (neat) 1621, 1508, 1032 cm<sup>-1</sup>; HRMS (FAB) *m/z*: [M - 2Br - H]<sup>+</sup> calcd for [C<sub>47</sub>H<sub>54</sub>N<sub>5</sub>O<sub>4</sub>]<sup>+</sup> 752.4176; found 752.4164. [α]<sub>D</sub><sup>20</sup> = -41.57 (*c* 1.0, DMSO).

### 1,3-Bis(quininium-*N*-methyl)-pyridine-*N*-oxide dibromide (**22**)

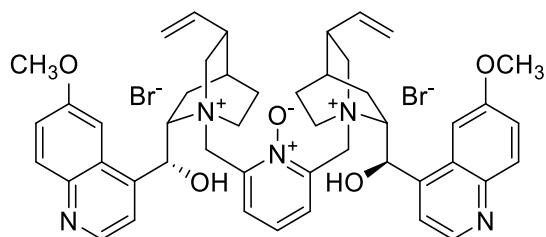

According to the procedure (A), from quinine (363.7 mg, 1.1212 mmol) and 2,6-bis(bromomethyl)pyridine *N*-oxide (150 mg 0.5339 mmol), the compound **22** was obtained (484.2 mg, 0.52 mmol, 98%).

White solid; mp 206-207 °C (MeOH- Et<sub>2</sub>O, decomp.); <sup>1</sup>H-NMR (400 MHz, CD<sub>3</sub>OD) δ 8.79 (d, *J* = 4.6 Hz, 2H), 8.23 (d, *J* = 7.8 Hz, 2H), 8.04 (d, *J* = 9.2 Hz, 2H), 7.88 (d, *J* = 4.6 Hz, 2H), 7.71 (t, *J* = 8.0 Hz, 1H), 7.52 (dd, *J* = 9.4, 2.5 Hz, 2H), 7.44 (d, *J* = 2.3 Hz, 2H), 6.67 (s, 2H), 5.85-5.77 (m, 2H), 5.55 (d, *J* = 12.8 Hz, 1H), 5.35 (d, *J* = 12.4 Hz, 1H), 5.19-5.06 (m, 4H), 4.65-4.60 (m, 2H), 4.54-4.49 (m, 2H), 4.11-3.97 (m, 10H), 3.91-3.87 (m, 2H), 3.71-3.65 (m, 2H), 2.90-2.89 (m, 2H), 2.38-2.25 (m, 4H), 2.11-2.10 (m, 2H), 2.04-2.02 (m, 2H), 1.62-1.57 (m, 2H) ppm; <sup>13</sup>C-NMR (101 MHz, CD<sub>3</sub>OD) δ 159.5, 147.8, 145.4, 144.2, 141.5, 138.3, 135.5, 131.4, 126.8, 126.8, 122.9, 120.8, 117.0, 101.7, 70.1, 65.8, 61.8, 59.0, 56.3, 53.9, 38.9, 26.9, 25.6, 21.8 ppm; IR (neat) 3365, 1620, 1508, 1240, 1023 cm<sup>-1</sup>; HRMS (FAB) *m/z*: [M - Br]<sup>+</sup> calcd for [C<sub>47</sub>H<sub>55</sub>BrN<sub>5</sub>O<sub>5</sub>]<sup>+</sup> 848.3387; found 848.3372. [α]<sub>D</sub><sup>20</sup> = -46.26 (*c* 1.0, MeOH).

### 1,3-Bis(cupreinium-*N*-methyl)-2-fluorobenzene dibromide (23)

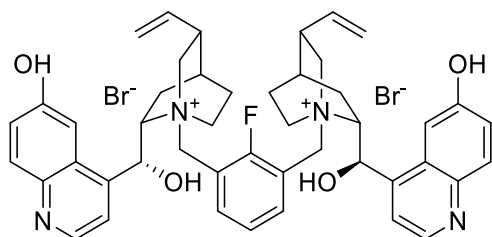

According to the procedure (A), from cupreine (synthesized according to the literatures)<sup>[8]</sup> (451.8 mg 1.456 mmol) and 1,3-bis(bromomethyl)-2-fluorobenzene (200.2 mg, 0.710 mmol), the compound **23** was obtained (636.4 mg, 0.705 mmol, 99%)

Reddish solid; mp 218-219 °C (MeOH-Et<sub>2</sub>O, decomp.); <sup>1</sup>H-NMR (400 MHz, CD<sub>3</sub>OD) δ 8.61 (d, *J* = 4.6 Hz, 2H), 7.96 (t, *J* = 7.1 Hz, 2H), 7.88 (d, *J* = 9.6 Hz, 2H), 7.77 (d, *J* = 4.6 Hz, 2H), 7.49 (t, *J* = 7.6 Hz, 1H), 7.36-7.33 (m, 4H), 6.46 (s, 2H), 5.78-5.69 (m, 2H), 5.35 (d, *J* = 12.8 Hz, 2H), 5.17 (d, *J* = 17.0 Hz, 2H), 5.03 (d, *J* = 10.5 Hz, 2H), 4.95-4.95 (m, 2H), 4.39-4.39 (m, 2H), 4.05-4.01 (m, 2H), 3.85-3.79 (m, 2H), 3.63-3.61 (m, 2H), 3.48-3.46 (m, 2H), 2.84-2.84 (m, 2H), 2.31-2.22 (m, 4H), 2.07-2.06 (m, 2H), 1.97-1.95 (m, 2H), 1.53-1.47 (m, 2H) ppm; <sup>13</sup>C-NMR (101 MHz, CD<sub>3</sub>OD) δ 160.1, 145.1, 143.2, 141.9, 138.7, 137.4, 130.2, 126.5, 125.6, 124.1, 119.6, 116.5, 116.3, 103.6, 68.7, 64.9, 60.8, 57.3, 51.6, 37.9, 26.5, 24.6, 20.9 ppm; IR (neat) 2965, 1619, 1487, 1238, 1053 cm<sup>-1</sup>; HRMS (FAB) *m/z*: [M - Br]<sup>+</sup> calcd for [C<sub>46</sub>H<sub>51</sub>BrFN<sub>4</sub>O<sub>4</sub>]<sup>+</sup> 742.3894; found 742.3891. [α]<sub>D</sub><sup>20</sup> = -5.52 (*c* 1.0, MeOH).

### 1,3-Bis(6'-ethoxy-cinchonidium-*N*-methyl)-2-fluorobenzene dibromide (24)

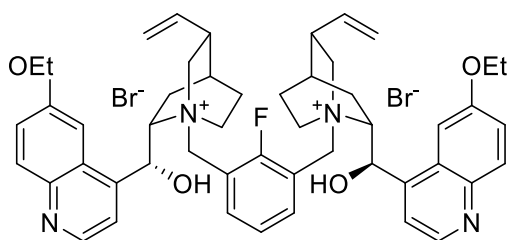

According to the procedure (A), from 6'-ethoxy-cinchonidine (synthesized according to the literatures)<sup>[7]</sup> (64.6 mg, 0.191 mmol) and 1,3-bis(bromomethyl)-2-fluorobenzene (26.3 mg, 0.093 mmol), the compound **24** was obtained (89.0 mg, 0.093 mmol, quant.).

Light brown solid; mp 192-193 °C (MeOH-Et<sub>2</sub>O, decomp.); <sup>1</sup>H-NMR (400 MHz, CD<sub>3</sub>OD) δ

8.73 (d,  $J = 4.6$  Hz, 2H), 8.01 (d,  $J = 9.2$  Hz, 2H), 7.97 (t,  $J = 7.6$  Hz, 2H), 7.83 (d,  $J = 4.6$  Hz, 2H), 7.56 (t,  $J = 7.8$  Hz, 1H), 7.50 (dd,  $J = 9.2, 2.3$  Hz, 2H), 7.46 (d,  $J = 2.3$  Hz, 2H), 6.60 (s, 2H), 5.82-5.74 (m, 2H), 5.42 (d,  $J = 13.3$  Hz, 2H), 5.14 (d,  $J = 17.4$  Hz, 2H), 5.03 (d,  $J = 10.5$  Hz, 2H), 4.84-4.82 (m, 2H), 4.36-4.25 (m, 6H), 4.04-3.90 (m, 4H), 3.62-3.54 (m, 4H), 2.89-2.81 (m, 2H), 2.34-2.22 (m, 4H), 2.07-1.96 (m, 4H), 1.63-1.57 (m, 2H), 1.45 (t,  $J = 6.9$  Hz, 6H) ppm;  $^{13}\text{C}$ -NMR (101 MHz,  $\text{CD}_3\text{OD}$ )  $\delta$  158.1, 146.9, 144.5, 143.4, 138.8, 137.5, 130.5, 126.3, 125.9, 122.0, 120.2, 116.6, 116.4, 116.4, 102.2, 68.7, 65.0, 64.1, 60.8, 57.6, 51.9, 38.1, 26.7, 24.7, 21.1, 13.9 ppm; IR (neat) 3202, 1619, 1509, 1240, 1039  $\text{cm}^{-1}$ ; HRMS (FAB)  $m/z$ :  $[\text{M} - \text{Br}]^+$  calcd for  $[\text{C}_{50}\text{H}_{59}\text{BrFN}_4\text{O}_4]^+$  877.3704; found 877.3692.  $[\alpha]_D^{20} = -18.64$  ( $c$  1.0, MeOH).

### 1,3-Bis(6'-isopropoxy-cinchonidium-*N*-methyl)-2-fluorobenzene dibromide (**25**)

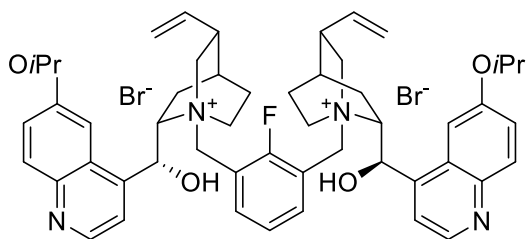

According to the procedure (A), from 6'-isopropoxy-cinchonidine (synthesized according to the literatures)<sup>[7]</sup> (149.8 mg, 0.425 mmol) and 1,3-bis(bromomethyl)-2-fluorobenzene (58.5 mg, 0.207 mmol), the compound **25** was obtained (56.4 mg, 0.057 mmol, 28%).

Brown solid; mp 189-190 °C (MeOH-Et<sub>2</sub>O, decomp.);  $^1\text{H}$ -NMR (400 MHz,  $\text{CD}_3\text{OD}$ )  $\delta$  8.76 (d,  $J = 4.6$  Hz, 2H), 8.05 (d,  $J = 9.2$  Hz, 2H), 7.99 (t,  $J = 7.3$  Hz, 2H), 7.85 (d,  $J = 4.6$  Hz, 2H), 7.60 (t,  $J = 7.8$  Hz, 1H), 7.54 (dd,  $J = 9.2, 2.8$  Hz, 2H), 7.51 (d,  $J = 2.3$  Hz, 2H), 6.59 (s, 2H), 5.85-5.76 (m, 2H), 5.42 (d,  $J = 12.8$  Hz, 2H), 5.16 (d,  $J = 17.0$  Hz, 2H), 5.06 (d,  $J = 10.5$  Hz, 2H), 5.01-4.95 (m, 2H), 4.93-4.91 (m, 2H), 4.34-4.30 (m, 2H), 4.05-4.01 (m, 2H), 3.97-3.91

(m, 2H), 3.58-3.55 (m, 4H), 2.91-2.90 (m, 2H), 2.36-2.32 (m, 2H), 2.28-2.22 (m, 2H), 2.11-2.10 (m, 2H), 2.04-2.02 (m, 2H), 1.65-1.59 (m, 2H), 1.42 (dd,  $J = 8.3, 6.0$  Hz, 12H) ppm;  $^{13}\text{C}$ -NMR (101 MHz,  $\text{CD}_3\text{OD}$ )  $\delta$  158.3, 148.3, 145.7, 144.7, 140.1, 138.8, 132.0, 127.7, 127.3, 123.6, 121.6, 117.9, 117.7, 105.5, 71.8, 70.2, 66.5, 62.4, 59.0, 53.2, 39.4, 28.0, 26.0, 22.6, 22.5, 22.4 ppm; IR (neat) 1508, 1240, 1017  $\text{cm}^{-1}$ ; HRMS (FAB)  $m/z$ :  $[\text{M} - \text{Br}]^+$  calcd for  $[\text{C}_{52}\text{H}_{63}\text{BrFN}_4\text{O}_4]^+$  905.4017; found 905.4025.  $[\alpha]_D^{20} = -7.01$  ( $c$  1.0, MeOH).

### 1,3-Bis(6'-diphenylmethoxy-cinchonidium-*N*-methyl)-2-fluorobenzene dibromide (**26**)

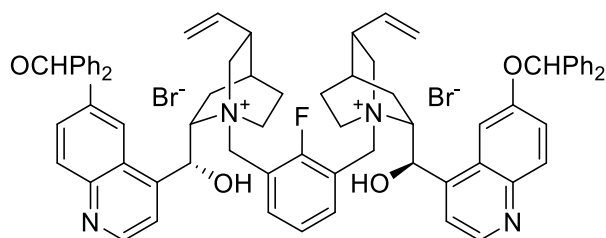

According to the procedure (A), from 6'-diphenylmethoxy-cinchonidine (synthesized according to the literatures)<sup>[8]</sup> (109.4 mg, 0.230 mmol) and 1,3-bis(bromomethyl)-2-fluorobenzene (31.6 mg, 0.112 mmol), the compound **26** was obtained (114.0 mg, 0.092 mmol, 82%)

Pale yellow solid; mp 195-196 °C (MeOH-Et<sub>2</sub>O, decomp.);  $^1\text{H}$ -NMR (400 MHz,  $\text{CD}_3\text{OD}$ )  $\delta$  8.74 (d,  $J = 4.6$  Hz, 2H), 8.03 (d,  $J = 9.6$  Hz, 2H), 7.98 (t,  $J = 7.3$  Hz, 2H), 7.80 (d,  $J = 4.6$  Hz, 2H), 7.67-7.60 (m, 3H), 7.58-7.55 (m, 6H), 7.52-7.50 (m, 4H), 7.36 (t,  $J = 7.6$  Hz, 4H), 7.28-7.18 (m, 8H), 6.97 (s, 2H), 6.35 (s, 2H), 5.65-5.56 (m, 2H), 5.13 (d,  $J = 13.3$  Hz, 2H), 5.07 (d,  $J = 17.0$  Hz, 2H), 4.99 (d,  $J = 10.1$  Hz, 2H), 4.77 (d,  $J = 12.8$  Hz, 2H), 4.27-4.20 (m, 2H), 4.02-3.96 (m, 2H), 3.80-3.76 (m, 2H), 3.58-3.55 (m, 2H), 3.39-3.36 (m, 2H), 2.88-2.80 (m, 2H), 2.24-2.19 (m, 2H), 2.12-2.10 (m, 2H), 2.02-2.01 (m, 4H), 1.53-1.47 (m, 2H) ppm;  $^{13}\text{C}$ -NMR



(101 MHz, CD<sub>3</sub>OD)  $\delta$  156.8, 147.2, 144.2, 143.5, 141.2, 141.1, 138.9, 137.5, 130.7, 128.5, 128.4, 127.8, 127.7, 126.9, 126.8, 126.1, 122.8, 120.5, 116.6, 116.4, 116.2, 104.6, 81.3, 68.3, 65.4, 61.3, 57.5, 51.9, 38.0, 26.6, 24.7, 21.5 ppm; IR (neat) 3383, 1619, 1508, 1238, 1004, 743 cm<sup>-1</sup>; HRMS (FAB) m/z: [M - Br]<sup>+</sup> calcd for [C<sub>72</sub>H<sub>71</sub>BrFN<sub>4</sub>O<sub>4</sub>]<sup>+</sup> 1153.4643; found 1153.4666.  $[\alpha]_D^{20} = -39.83$  (c 1.0, MeOH).

**Procedure for 1,3-Bis(6'-fluoromethoxy-cinchonidium-N-methyl)-2-fluorobenzene dibromide(27)**

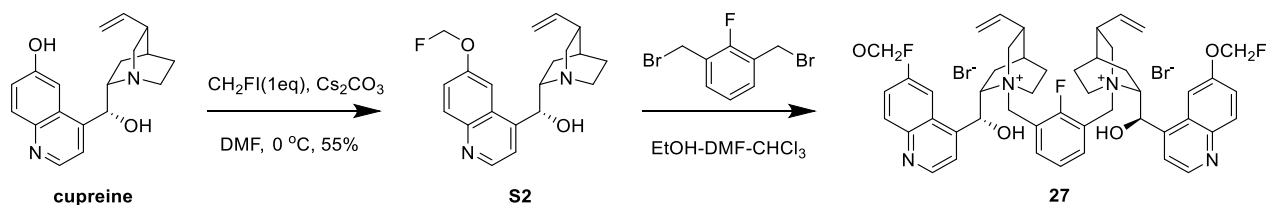

**(R)-[6-(fluoromethoxy)quinolin-4-yl][(1S,2S,4S,5R)-5-vinylquinuclidin-2-yl]methanol (S2)**

A mixture of cupreine (synthesized according to the literatures)<sup>[8]</sup> (213.0 mg, 0.686 mmol) and cesium carbonate (670.7 mg, 2.059 mmol) in DMF (4.3 mL) was added fluoroiodomethane (2 M in acetonitrile, 0.343 mL, 0.686 mmol) at 0 °C and stirred for 2h. The resulting mixture was quenched with water, extracted with dichloromethane, washed with ammonia water and brine, dried over MgSO<sub>4</sub>, filtered and concentrated. The crude was purified by column chromatography (silica gel, DCM : MeOH = 100:0 to 90:10) to afford **S2** (125.2 mg, 0.366 mmol, 53%).

Pink solid; mp 197-198 °C (MeOH-Et<sub>2</sub>O, decomp.); <sup>1</sup>H-NMR (400 MHz, CD<sub>3</sub>OD)  $\delta$  8.76 (d,

$J = 4.6$  Hz, 1H), 8.06 (d,  $J = 9.6$  Hz, 1H), 7.81 (d,  $J = 2.3$  Hz, 1H), 7.72 (d,  $J = 4.6$  Hz, 1H), 7.58 (dd,  $J = 9.1, 2.3$  Hz, 1H), 6.08-5.89 (m, 2H), 5.83-5.74 (m, 1H), 5.54-5.53 (m, 1H), 5.01-4.91 (m, 2H), 3.64-3.59 (m, 1H), 3.18-3.06 (m, 2H), 2.70-2.66 (m, 2H), 2.35-2.30 (m, 1H), 1.90-1.82 (m, 3H), 1.63-1.51 (m, 2H) ppm;  $^{13}\text{C}$ -NMR (101 MHz,  $\text{CD}_3\text{OD}$ )  $\delta$  156.10, 156.08, 151.51, 149.74, 145.84, 142.89, 132.12, 128.01, 123.06, 120.65, 115.01, 107.82, 102.67, 100.51, 72.69, 61.55, 57.64, 44.06, 41.06, 29.32, 28.39, 22.55 ppm; IR (neat) 2937, 1623, 1510, 1217, 1095, 758  $\text{cm}^{-1}$ ; HRMS (FAB)  $m/z$ :  $[\text{M} + \text{H}]^+$  calcd for  $[\text{C}_{20}\text{H}_{24}\text{FN}_2\text{O}_2]^+$  343.1822; found 343.1825.  $[\alpha]_{\text{D}}^{20} = -100.43$  ( $c$  1.0,  $\text{CHCl}_3$ ).

### 1,3-Bis(6'-fluoromethoxy-cinchonidium-*N*-methyl)-2-fluorobenzene dibromide(27)

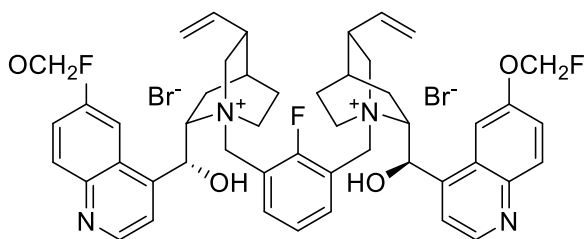

According to the procedure (A), from **S2** (95.5 mg, 0.280 mmol) and 1,3-bis(bromomethyl)-2-fluorobenzene (38.5 mg, 0.136 mmol), the compound **27** was obtained (123.0 mg, 0.127 mmol, 93%).

Pink solid; mp 204-205 °C (MeOH-Et<sub>2</sub>O, decomp.);  $^1\text{H}$ -NMR (400 MHz,  $\text{CD}_3\text{OD}$ )  $\delta$  8.87 (d,  $J = 4.6$  Hz, 2H), 8.12 (d,  $J = 9.1$  Hz, 2H), 8.00 (t,  $J = 7.3$  Hz, 2H), 7.93 (d,  $J = 4.6$  Hz, 2H), 7.82 (d,  $J = 2.7$  Hz, 2H), 7.64 (dd,  $J = 9.1, 2.7$  Hz, 2H), 7.60 (d,  $J = 7.3$  Hz, 1H), 6.70 (s, 2H), 6.10 (dd,  $J = 48.0, 3.7$  Hz, 2H), 5.96 (dd,  $J = 46.7, 3.2$  Hz, 2H), 5.84-5.75 (m, 2H), 5.53 (d,  $J = 12.8$  Hz, 2H), 5.16 (d,  $J = 16.9$  Hz, 2H), 5.05 (d,  $J = 10.5$  Hz, 2H), 4.86-4.80 (m, 2H), 4.36-4.30 (m, 2H), 4.07-4.03 (m, 2H), 3.93-3.88 (m, 2H), 3.64-3.52 (m, 4H), 2.92-2.91 (m, 2H),

2.40-2.29 (m, 4H), 2.14-2.10 (m, 2H), 2.04-1.98 (m, 2H), 1.64-1.58 (m, 2H) ppm;  $^{13}\text{C}$ -NMR (101 MHz,  $\text{CD}_3\text{OD}$ )  $\delta$  156.9, 156.9, 150.0, 147.0, 145.9, 140.2, 138.8, 132.6, 127.5, 127.2, 123.5, 121.9, 118.0, 117.9, 117.8, 107.6, 103.7, 101.5, 70.9, 66.2, 62.1, 59.4, 53.2, 39.5, 28.1, 26.0, 22.1 ppm; IR (neat) 1621, 1509, 1240, 1095, 770  $\text{cm}^{-1}$ ; HRMS (FAB)  $m/z$ :  $[\text{M} - \text{Br}]^+$  calcd for  $[\text{C}_{48}\text{H}_{53}\text{BrF}_3\text{N}_4\text{O}_4]^+$  885.3202; found 885.3227.  $[\alpha]_{\text{D}}^{20} = -39.01$  ( $c$  1.0, MeOH).

### 1,3-Bis(6'-fluoro-cinchonidium-*N*-methyl)-2-fluorobenzene dibromide (**28**)

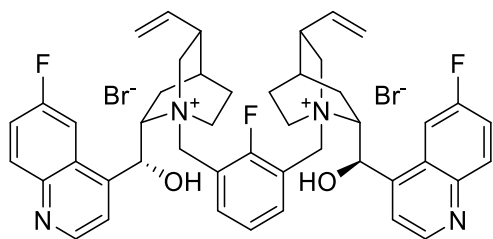

According to the procedure (A), from 6'-fluoro-cinchonidine (synthesized according to the literatures)<sup>[9]</sup> (33.7 mg, 0.108 mmol) and 1,3-bis(bromomethyl)-2-fluorobenzene (14.8 mg, 0.053 mmol), the compound **28** was obtained (45.2 mg, 0.050 mmol, 95%).

Pale yellow solid; mp 196-197 °C (MeOH-Et<sub>2</sub>O, decomp.);  $^1\text{H}$ -NMR (400 MHz,  $\text{CD}_3\text{OD}$ )  $\delta$  8.90 (d,  $J = 4.6$  Hz, 2H), 8.17 (dd,  $J = 9.4, 5.7$  Hz, 2H), 8.03 (dd,  $J = 9.9, 2.5$  Hz, 2H), 7.97 (t,  $J = 7.3$  Hz, 2H), 7.91 (d,  $J = 4.6$  Hz, 2H), 7.65-7.70 (m, 2H), 7.56 (t,  $J = 7.6$  Hz, 1H), 6.52 (s, 2H), 5.82-5.74 (m, 2H), 5.24 (d,  $J = 12.8$  Hz, 2H), 5.15 (d,  $J = 17.0$  Hz, 2H), 5.05 (d,  $J = 7.8$  Hz, 2H), 5.02 (d,  $J = 5.0$  Hz, 2H), 4.30-4.24 (m, 2H), 4.08-4.03 (m, 2H), 3.96-3.90 (m, 2H), 3.69-3.65 (m,  $J = 3.4$  Hz, 2H), 3.56-3.49 (m, 2H), 2.88-2.80 (m, 2H), 2.28-2.13 (m, 4H), 2.08-2.07 (m, 2H), 2.01-1.97 (m, 2H), 1.59-1.47 (m, 2H) ppm;  $^{13}\text{C}$ -NMR (101 MHz,  $\text{CD}_3\text{OD}$ )  $\delta$  159.83, 149.20, 145.65, 145.59, 144.84, 138.74, 137.54, 132.01, 131.92, 125.83, 120.83, 120.10, 119.84, 116.44, 116.30, 106.81, 68.00, 65.24, 60.95, 57.15, 51.94, 38.03, 26.61, 24.72,

21.41 ppm; IR (neat) 1624, 1514, 1460, 1174, 921  $\text{cm}^{-1}$ ; HRMS (FAB)  $m/z$ :  $[\text{M} - \text{Br}]^+$  calcd for  $[\text{C}_{46}\text{H}_{49}\text{BrF}_3\text{N}_4\text{O}_2]^+$  825.2991; found 825.3002.  $[\alpha]_{\text{D}}^{20} = -19.06$  ( $c$  1.0, MeOH).

### 1,3-Bis(6'-methyl-cinchonidium-*N*-methyl)-2-fluorobenzene dibromide (**29**)

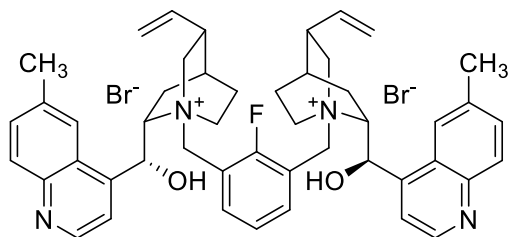

According to the procedure (A), from 6'-methyl-cinchonidine (synthesized according to the literatures)<sup>[10]</sup> (67.5 mg, 0.219 mmol) and 1,3-bis(bromomethyl)-2-fluorobenzene (30.1 mg, 0.107 mmol), the compound **29** was obtained (51.9 mg, 0.058 mmol, 54%).

Ivory solid; mp 202-203 °C (MeOH-Et<sub>2</sub>O, decomp.); <sup>1</sup>H-NMR (400 MHz, DMSO-*d*<sub>6</sub>)  $\delta$  8.90 (d,  $J = 4.6$  Hz, 2H), 8.12 (t,  $J = 7.1$  Hz, 2H), 8.03-7.99 (m, 4H), 7.76 (d,  $J = 4.1$  Hz, 2H), 7.67 (d,  $J = 8.7$  Hz, 2H), 7.62 (t,  $J = 7.8$  Hz, 1H), 6.98 (s, 2H), 6.54 (s, 2H), 5.82-5.74 (m, 2H), 5.46 (d,  $J = 12.8$  Hz, 2H), 5.18 (d,  $J = 17.4$  Hz, 2H), 5.07-5.00 (m, 4H), 4.26-4.20 (m, 2H), 4.10-4.02 (m, 2H), 3.78-3.72 (m, 2H), 3.67-3.62 (m, 2H), 3.32-3.30 (m, 2H), 2.75-2.70 (m, 2H), 2.63 (s, 6H), 2.19-2.08 (m, 4H), 2.02-1.99 (m, 2H), 1.83-1.80 (m, 2H), 1.44-1.38 (m, 2H) ppm; <sup>13</sup>C-NMR (101 MHz, DMSO-*d*<sub>6</sub>)  $\delta$  149.7, 146.8, 145.0, 138.9, 138.6, 137.3, 132.1, 130.2, 125.0, 122.7, 120.6, 117.2, 117.0, 68.3, 64.5, 56.8, 51.2, 37.9, 26.3, 24.9, 22.2, 21.4 ppm; IR (neat) 1747, 1508, 1217, 1031, 773  $\text{cm}^{-1}$ ; HRMS (ESI)  $m/z$ :  $[\text{M} - 2\text{Br} - \text{H}]^+$  calcd for  $[\text{C}_{48}\text{H}_{54}\text{FN}_4\text{O}_2]^+$  737.4225; found 737.4256.  $[\alpha]_{\text{D}}^{20} = -2.92$  ( $c$  1.0, MeOH).

### 6'-Ethyl-cinchonidine (S3)

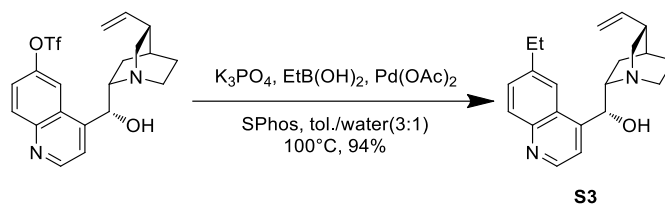

A mixture of 6'-*O*-trifluoromethylsulfonyl-cinchonidine (synthesized according to the literatures)<sup>[8]</sup> (300 mg, 0.678 mmol), potassium phosphate tribasic (359.8, 1.695 mmol), ethyl boronic acid (77.5 mg, 1.017 mmol), palladium acetate (15.2 mg, 0.068 mmol) and SPhos (55.7 mg, 0.136 mmol) in toluene-water (3:1, 4.5 mL) was stirred at 100 °C for 2h. The resulting mixture was quenched with 1 N HCl, washed with dichloromethane. The aqueous layer was basified with NH<sub>4</sub>OH solution, extracted with dichloromethane, washed with brine, dried over MgSO<sub>4</sub>, filtered and concentrated. The crude was purified by column chromatography (silica gel, DCM : MeOH = 100:0 to 90:10) afford **S3** (206.2 mg, 0.639 mmol, 94%).

White solid; mp 168-169 °C; <sup>1</sup>H-NMR (400 MHz, CDCl<sub>3</sub>) δ 8.74 (d, *J* = 4.1 Hz, 1H), 7.98 (d, *J* = 8.7 Hz, 1H), 7.78 (s, 1H), 7.53-7.50 (m, 2H), 5.76-5.68 (m, 2H), 4.97-4.89 (m, 2H), 3.50-3.45 (m, 1H), 3.18-3.07 (m, 2H), 2.77 (q, *J* = 7.5 Hz, 2H), 2.71-2.64 (m, 2H), 2.28 (s, 1H), 1.82-1.71 (m, 3H), 1.56-1.46 (m, 2H), 1.26 (t, *J* = 7.6 Hz, 3H) ppm <sup>13</sup>C-NMR (101 MHz, CDCl<sub>3</sub>) δ 149.34, 148.27, 146.99, 143.08, 141.67, 130.30, 130.15, 125.72, 120.77, 118.19, 114.60, 77.43, 77.11, 76.80, 71.63, 60.31, 57.00, 43.37, 39.88, 29.33, 27.92, 27.52, 21.66, 15.99 ppm; IR (neat) 2931, 1589, 1507, 1101, 758 cm<sup>-1</sup>; HRMS (FAB) *m/z*: [M + H]<sup>+</sup> calcd for [C<sub>21</sub>H<sub>27</sub>N<sub>2</sub>O]<sup>+</sup> 323.2123; found 323.2129. [α]<sub>D</sub><sup>20</sup> = -75.24 (*c* 1.0, CHCl<sub>3</sub>).

### 1,3-Bis(6'-ethyl-cinchonidium-*N*-methyl)-2-fluorobenzene dibromide (**30**)

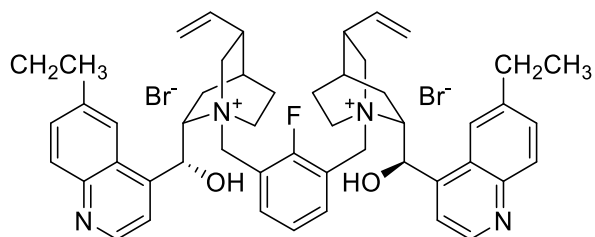

According to the procedure (A), from 6'-ethyl-cinchonidine (**S3**) (150 mg, 0.465 mmol) and 1,3-bis(bromomethyl)-2-fluorobenzene (64.0 mg 0.227 mmol), the compound **30** was obtained (201.9 mg, 0.218 mmol, 96%).

Ivory solid; mp 189-190 °C (MeOH-Et<sub>2</sub>O, decomp.); <sup>1</sup>H-NMR (500 MHz, DMSO-*d*<sub>6</sub>) δ 8.90 (d, *J* = 4.3 Hz, 2H), 8.12 (t, *J* = 7.3 Hz, 2H), 8.04-8.01 (m, 4H), 7.77 (d, *J* = 4.5 Hz, 2H), 7.72 (d, *J* = 8.8 Hz, 2H), 7.62 (t, *J* = 7.7 Hz, 1H), 7.25 (s, 2H), 6.62 (s, 2H), 5.82-5.75 (m, 2H), 5.56 (d, *J* = 12.6 Hz, 2H), 5.17 (d, *J* = 17.3 Hz, 2H), 5.01-4.97 (m, 4H), 4.28-4.28 (m, 2H), 4.09-4.06 (m, 2H), 3.72-3.67 (m, 3H), 3.40-3.38 (m, 2H), 2.96-2.92 (m, 4H), 2.79-2.73 (m, 2H), 2.19-2.08 (m, 4H), 2.02-2.02 (m, 2H), 1.85-1.85 (m, 2H), 1.44-1.40 (m, 2H), 1.32 (t, *J* = 7.6 Hz, 6H) ppm; <sup>13</sup>C-NMR (126 MHz, DMSO-*d*<sub>6</sub>) δ 161.3, 150.1, 147.4, 145.7, 143.7, 139.2, 138.9, 131.2, 130.7, 126.2, 125.4, 121.8, 120.9, 117.5, 117.4, 117.3, 69.0, 64.7, 60.0, 57.3, 51.5, 38.2, 29.3, 26.6, 25.2, 21.7, 16.4 ppm; IR (neat) 2965, 1508, 1032, 772 cm<sup>-1</sup>; HRMS (ESI) *m/z*: [M - 2Br - H]<sup>+</sup> calcd for [C<sub>50</sub>H<sub>59</sub>BrFN<sub>4</sub>O<sub>2</sub>]<sup>+</sup> 845.3805; found 845.3792. [α]<sub>D</sub><sup>20</sup> = -57.48 (*c* 1.0, MeOH).

### 1,3-Bis(6'-phenyl-cinchonidium-*N*-methyl)-2-fluorobenzene dibromide (**31**)

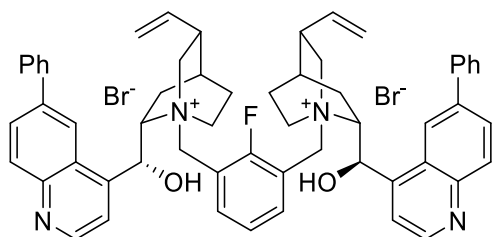

According to the procedure (A), from 6'-phenyl-cinchonidine (synthesized according to the literatures)<sup>[8]</sup> (120.0 mg, 0.324 mmol) and 1,3-bis(bromomethyl)-2-fluorobenzene (44.5 mg, 0.158 mmol), the compound **31** was obtained (161.8 mg, 0.158 mmol, quant.).

Brown solid; mp 193-194 °C (MeOH-Et<sub>2</sub>O, decomp.); <sup>1</sup>H-NMR (400 MHz, CD<sub>3</sub>OD) δ 8.94 (d, *J* = 4.6 Hz, 2H), 8.41 (s, 2H), 8.22 (d, *J* = 8.7 Hz, 2H), 8.15 (dd, *J* = 8.9, 1.6 Hz, 2H), 7.97-7.94 (m, 4H), 7.89 (d, *J* = 7.3 Hz, 4H), 7.58 (t, *J* = 7.8 Hz, 1H), 7.49 (t, *J* = 7.6 Hz, 4H), 7.39 (t, *J* = 7.3 Hz, 2H), 6.82 (s, 2H), 5.84-5.75 (m, 2H), 5.48 (d, *J* = 13.3 Hz, 2H), 5.14 (d, *J* = 17.4 Hz, 2H), 5.04 (d, *J* = 10.1 Hz, 2H), 4.85 (s, 2H), 4.37 (t, *J* = 10.8 Hz, 2H), 4.13 (t, *J* = 8.5 Hz, 2H), 3.85 (t, *J* = 11.5 Hz, 2H), 3.61-3.48 (m, 4H), 2.88 (d, *J* = 4.6 Hz, 2H), 2.39 (q, *J* = 6.4 Hz, 2H), 2.29 (s, 2H), 2.11 (d, *J* = 2.3 Hz, 2H), 2.02-1.96 (m, 2H), 1.70-1.64 (m, 2H) ppm; <sup>13</sup>C-NMR (101 MHz, CD<sub>3</sub>OD) δ 149.6, 146.9, 146.3, 140.6, 140.2, 138.7, 137.4, 129.7, 129.6, 128.9, 127.9, 127.5, 125.4, 120.5, 120.2, 116.6, 116.4, 69.1, 64.9, 60.8, 57.6, 51.9, 38.1, 26.7, 24.7, 21.1 ppm; IR (neat) 3370, 1572, 1491, 756 cm<sup>-1</sup>; HRMS (ESI) *m/z*: [M - 2Br - H]<sup>+</sup> calcd for [C<sub>58</sub>H<sub>58</sub>FN<sub>4</sub>O<sub>2</sub>]<sup>+</sup> 861.4553; found 861.4538. [α]<sub>D</sub><sup>20</sup> = -21.61 (*c* 1.0, MeOH).

### 1,3-Bis(hydroquininium-*N*-methyl)-2-fluorobenzene dibromide (**32**)

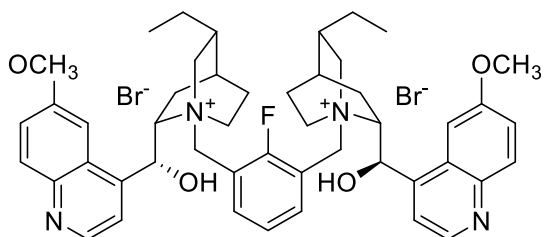

According to the procedure (A), from hydroquinine (200 mg, 0.613 mmol) and 1,3-bis(bromomethyl)-2-fluorobenzene (84.3 mg 0.299 mmol), the compound **32** was obtained. (177.2 mg, 0.190 mmol, 63%).

Yellow solid; mp 209-210 °C (MeOH-Et<sub>2</sub>O, decomp.); <sup>1</sup>H-NMR (400 MHz, CD<sub>3</sub>OD) δ 8.77 (d, *J* = 4.6 Hz, 2H), 8.04 (d, *J* = 9.2 Hz, 2H), 7.98 (t, *J* = 7.3 Hz, 2H), 7.88 (d, *J* = 4.6 Hz, 2H), 7.58 (t, *J* = 7.8 Hz, 1H), 7.52 (dd, *J* = 9.2, 2.8 Hz, 2H), 7.48 (d, *J* = 2.3 Hz, 2H), 6.67 (s, 2H), 5.48 (d, *J* = 12.8 Hz, 2H), 4.81 (d, *J* = 12.8 Hz, 2H), 4.62-4.60 (m, 2H), 4.32-4.30 (m, 2H), 4.07 (s, 6H), 4.03-3.99 (m, 2H), 3.92-3.87 (m, 2H), 3.53-3.52 (m, 2H), 3.40-3.38 (m, 2H), 2.38-2.33 (m, 2H), 2.25-2.24 (m, 2H), 2.07-2.00 (m, 4H), 1.94-1.92 (m, 2H), 1.63-1.48 (m, 2H), 1.40-1.30 (m, 4H), 0.84-0.80 (m, 6H) ppm; <sup>13</sup>C-NMR (101 MHz, CD<sub>3</sub>OD) δ 158.7, 146.9, 144.7, 143.5, 138.6, 130.5, 126.2, 125.9, 122.0, 120.3, 116.6, 116.5, 101.4, 68.8, 64.9, 62.6, 57.7, 55.3, 51.9, 35.8, 25.8, 25.2, 24.4, 20.7, 10.3 ppm; IR (neat) 2957, 1620, 1509, 1240, 1024, 829 cm<sup>-1</sup>; HRMS (FAB) *m/z*: [M - Br]<sup>+</sup> calcd for [C<sub>48</sub>H<sub>59</sub>BrFN<sub>4</sub>O<sub>4</sub>]<sup>+</sup> 853.3704; found 853.3714. [α]<sub>D</sub><sup>20</sup> = -36.86 (*c* 1.0, MeOH).

### 1,3-Bis(3-desvinyl-quininium-*N*-methyl)-2-fluorobenzene dibromide (33)

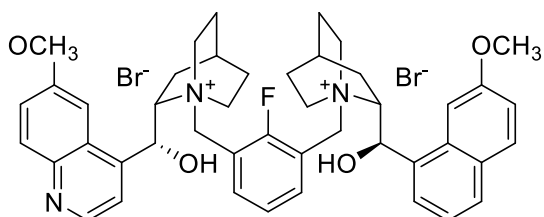



According to the procedure (A), from 3-desvinylquinine (synthesized according to the literatures)<sup>[11]</sup> (73.6 mg, 0.247 mmol) and 1,3-bis(bromomethyl)-2-fluorobenzene (34.8 mg 0.120 mmol), the compound **33** was obtained (102.2 mg, 0.116 mmol, 97%).

Pale yellow solid; mp 215-216 °C (MeOH-Et<sub>2</sub>O, decomp.); <sup>1</sup>H-NMR (400 MHz, CD<sub>3</sub>OD) δ 8.80 (d, *J* = 5.0 Hz, 2H), 8.06 (d, *J* = 9.2 Hz, 2H), 8.01 (t, *J* = 7.3 Hz, 2H), 7.92 (d, *J* = 4.6 Hz, 2H), 7.61 (t, *J* = 7.8 Hz, 1H), 7.55 (dd, *J* = 9.4, 2.5 Hz, 2H), 7.51 (d, *J* = 2.3 Hz, 2H), 6.69 (s, 2H), 5.40 (d, *J* = 13.3 Hz, 2H), 4.87-4.87 (m, 2H), 4.64 (s, 4H), 4.50-4.49 (m, 2H), 4.12-4.10 (m, 8H), 3.91-3.86 (m, 2H), 3.68-3.66 (m, 2H), 3.59 (d, *J* = 9.2 Hz, 2H), 2.46-2.41 (m, 2H), 2.16-2.09 (m, 4H), 1.97-1.88 (m, 6H), 1.44-1.38 (m, 2H) ppm; <sup>13</sup>C-NMR (101 MHz, CD<sub>3</sub>OD) δ 158.7, 146.9, 144.6, 143.4, 138.6, 130.5, 126.1, 125.8, 121.9, 120.2, 116.7, 116.5, 101.5, 68.4, 65.2, 57.6, 57.1, 55.3, 52.0, 25.5, 23.8, 23.0, 20.6 ppm; IR (neat) 2912, 1621, 1508, 1032 cm<sup>-1</sup>; HRMS (FAB) *m/z*: [M - Br]<sup>+</sup> calcd for [C<sub>44</sub>H<sub>51</sub>BrFN<sub>4</sub>O<sub>4</sub>]<sup>+</sup> 797.3078; found 797.3079. [α]<sub>D</sub><sup>20</sup> = -25.00 (*c* 1.0, MeOH).

### 1,3-Bis(11-*trans*-phenyl-quininium-*N*-methyl)-2-fluorobenzene dibromide (**34**)

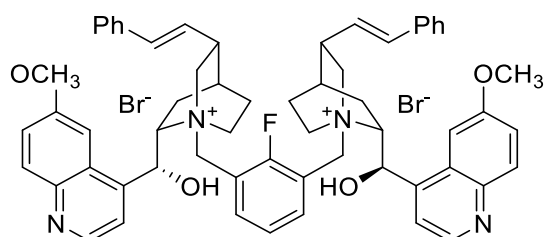

According to the procedure (A), from 11-(phenyl)-quinine (synthesized according to the literatures)<sup>[12]</sup> (99.0 mg, 0.247 mmol) and 1,3-bis(bromomethyl)-2-fluorobenzene (34.0 mg 0.121 mmol), the compound **34** was obtained (102.2 mg, 0.116 mmol, 97%)

Pale yellow solid; mp 215-216 °C (MeOH-Et<sub>2</sub>O, decomp.); <sup>1</sup>H-NMR (400 MHz, CD<sub>3</sub>OD) δ

8.75-8.72 (m, 2H), 7.99 (d,  $J = 8.7$  Hz, 2H), 7.95 (t,  $J = 7.3$  Hz, 2H), 7.82 (d,  $J = 4.6$  Hz, 2H), 7.54-7.45 (m, 4H), 7.23 (d,  $J = 7.3$  Hz, 3H), 7.18 (t,  $J = 7.3$  Hz, 4H), 7.15-7.11 (m, 2H), 6.62 (s, 2H), 6.48 (d,  $J = 15.6$  Hz, 2H), 6.24 (q,  $J = 7.9$  Hz, 2H), 5.40 (d,  $J = 12.8$  Hz, 2H), 4.23-4.16 (m, 2H), 4.01 (s, 6H), 3.68-3.58 (m, 4H), 3.08-3.06 (m, 2H), 2.34 (q,  $J = 5.8$  Hz, 2H), 2.25-2.23 (m, 2H), 2.12-2.12 (m, 2H), 2.07-2.04 (m, 2H), 1.77-1.77 (m, 2H) ppm;  $^{13}\text{C}$ -NMR (101 MHz,  $\text{CD}_3\text{OD}$ )  $\delta$  158.7, 147.0, 144.6, 143.5, 138.7, 136.6, 132.4, 130.5, 128.4, 128.3, 128.2, 127.4, 126.3, 126.0, 126.0, 121.9, 120.1, 101.6, 68.8, 64.9, 61.2, 57.8, 55.2, 52.1, 37.8, 27.2, 24.8, 21.2 ppm; IR (neat) 3394, 1621, 1509, 1240, 1026, 751  $\text{cm}^{-1}$ ; HRMS (FAB)  $m/z$ :  $[\text{M} - \text{Br}]^+$  calcd for  $[\text{C}_{60}\text{H}_{63}\text{BrFN}_4\text{O}_4]^+$  1001.4017; found 1001.4052.  $[\alpha]_D^{20} = -47.06$  ( $c$  1.0, MeOH).

### 1,3-Bis(10-hydroxy-11-norquinnium-*N*-methyl)-2-fluorobenzene dibromide (**35**)

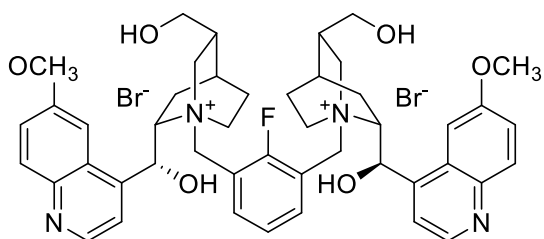

According to the procedure (A), from 10-hydroxy-11-norquinine (synthesized according to the literatures)<sup>[13]</sup> (38.1 mg, 0.116 mmol) and 1,3-bis(bromomethyl)-2-fluorobenzene (16.0 mg 0.057 mmol), the compound **35** was obtained (19.7 mg, 0.021 mmol, 37%)

Brown solid; mp 195-196 °C (MeOH-Et<sub>2</sub>O, decomp.);  $^1\text{H}$ -NMR (400 MHz,  $\text{CD}_3\text{OD}$ )  $\delta$  8.81 (t,  $J = 4.1$  Hz, 2H), 8.07 (d,  $J = 9.2$  Hz, 2H), 8.01 (t,  $J = 7.3$  Hz, 2H), 7.91 (d,  $J = 4.6$  Hz, 2H), 7.65 (t,  $J = 7.6$  Hz, 1H), 7.56 (dd,  $J = 9.4, 2.5$  Hz, 2H), 7.47 (d,  $J = 2.8$  Hz, 2H), 6.67 (s, 2H), 5.49 (d,  $J = 12.8$  Hz, 2H), 4.67 (m, 2H), 4.51-4.45 (m, 2H), 4.15-4.08 (m, 8H), 3.74-3.68 (m,

2H), 3.51-3.44 (m, 8H), 2.38-2.33 (m, 2H), 2.28-2.28 (m, 4H), 2.19-2.19 (m, 2H), 1.95-1.88 (m, 4H), 1.62-1.56 (m, 2H) ppm;  $^{13}\text{C-NMR}$  (101 MHz,  $\text{CD}_3\text{OD}$ )  $\delta$  158.7, 147.0, 144.6, 143.4, 138.6, 130.6, 126.1, 121.8, 120.2, 116.7, 116.5, 101.4, 69.1, 65.0, 62.2, 59.8, 57.7, 55.1, 36.6, 25.3, 23.1, 22.9, 21.6 ppm; IR (neat) 2951, 1621, 1510, 1219, 1019, 835  $\text{cm}^{-1}$ ; HRMS (FAB)  $m/z$ :  $[\text{M} - \text{Br}]^+$  calcd for  $[\text{C}_{46}\text{H}_{55}\text{BrFN}_4\text{O}_6]^+$  875.3296; found 875.3287.  $[\alpha]_{\text{D}}^{20} = -187.77$  ( $c$  0.5, MeOH).

**Procedure for 1,3-Bis(10-cyano-11-norquinnium-*N*-methyl)-2-fluorobenzene dibromide (1f)**

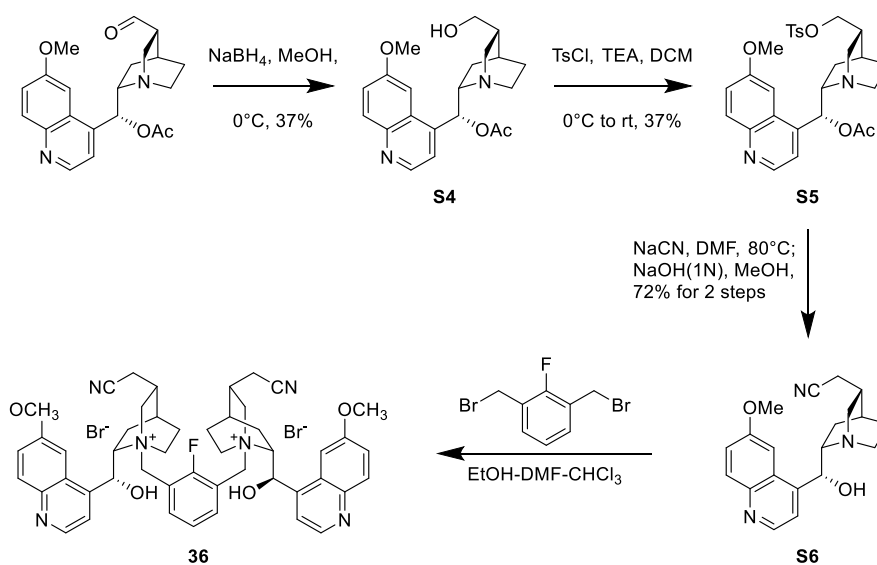

**(*R*)-[(1*S*,2*S*,4*S*,5*R*)-5-(hydroxymethyl)quinuclidin-2-yl][(6-methoxyquinolin-4-yl)methyl acetate (**S4**)**

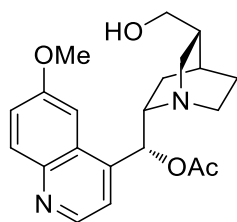

To a compound (1*S*,3*R*,4*S*,6*S*)-6-[(*R*)-hydroxy(6-methoxyquinolin-4-yl)methyl]quinuclidine-

3-carbaldehyde (synthesized according to the literatures)<sup>[14]</sup> (1.21g, 3.3 mmol) in dry MeOH (33 mL) was added slowly sodium borohydride (800.1 mg, 21.15 mmol) at 0 °C and stirred at rt for 2h. The reaction was quenched with water, extracted with DCM, washed with brine, dried over MgSO<sub>4</sub>, filtered and concentrated *in vacuo*. The residue was purified by column chromatography (silica gel, DCM : MeOH = 100:0 to 80:20) to afford **S4** (445.4 mg, 1.202 mmol, 36%).

Pale yellow sticky caramel; <sup>1</sup>H-NMR (400 MHz, CDCl<sub>3</sub>) δ 8.72 (d, *J* = 4.6 Hz, 1H), 8.00 (d, *J* = 9.1 Hz, 1H), 7.42 (s, 1H), 7.36 (dd, *J* = 9.4, 2.5 Hz, 1H), 7.32 (d, *J* = 4.6 Hz, 1H), 6.52 (s, 1H), 3.96 (s, 3H), 3.55 (d, *J* = 7.3 Hz, 2H), 3.28-3.34 (m, 1H), 3.13-3.13 (m, 1H), 2.97-3.03 (m, 1H), 2.69-2.69 (m, 1H), 2.40-2.40 (m, 1H), 2.12 (s, 3H), 2.00-2.03 (m, 1H), 1.76-1.82 (m, 2H), 1.60-1.60 (m, 3H) ppm; <sup>13</sup>C-NMR (101 MHz, CDCl<sub>3</sub>) δ 158.02, 147.64, 146.79, 144.29, 131.80, 126.37, 121.74, 118.44, 118.38, 113.47, 101.02, 71.37, 59.85, 56.92, 55.92, 42.97, 32.61, 27.31, 25.76, 21.86, 20.41, 20.20 ppm ; IR (neat) 2942, 1620, 1509, 1230, 1027, 754 cm<sup>-1</sup>; HRMS (FAB) *m/z*: [M + H]<sup>+</sup> calcd for [C<sub>21</sub>H<sub>27</sub>N<sub>2</sub>O<sub>4</sub>]<sup>+</sup> 371.1971; found 371.1978. [α]<sub>D</sub><sup>20</sup> = -12.76 (*c* 1.0, CHCl<sub>3</sub>).

**(R)-(6-methoxyquinolin-4-yl)[(1S,2S,4S,5R)-5-[(tosyloxy)methyl]quinuclidin-2-yl]methyl acetate (S5)**

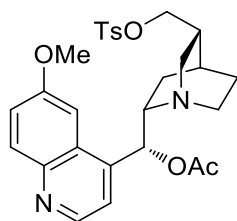

To a solution of a compound **S4** (300 mg, 0.81 mmol) in dichloromethane (8 mL) were added

tosyl chloride (209.2 mg, 1.215 mmol) and trimethylamine (0.23 mL, 1.62 mmol) at 0 °C. The mixture was stirred at rt for overnight. The resulting solution was quenched with water, extracted with dichloromethane, washed with brine, dried over MgSO<sub>4</sub>, filtered and concentrated. The crude was purified by column chromatography (silica gel, DCM : MeOH = 100:0 to 95:5) afford **S5** (158.6 mg, 0.3025 mmol, 37%).

White sticky caramel; <sup>1</sup>H-NMR (400 MHz, CDCl<sub>3</sub>) δ 8.70 (d, *J* = 4.6 Hz, 1H), 7.99 (d, *J* = 9.2 Hz, 1H), 7.71 (d, *J* = 8.5 Hz, 2H), 7.26-7.36 (m, 5H), 6.43-6.45 (m, 1H), 3.93 (s, 3H), 3.89-3.92 (m, 1H), 3.84-3.88 (m, 1H), 3.16-3.23 (m, 1H), 3.08-3.08 (m, 1H), 2.89-2.95 (m, 1H), 2.56-2.64 (m, 1H), 2.40 (s, 3H), 2.22-2.26 (m, 1H), 2.10 (s, 3H), 1.89-2.02 (m, 2H), 1.63-1.72 (m, 2H), 1.45-1.53 (m, 2H) ppm; <sup>13</sup>C-NMR (101 MHz, CDCl<sub>3</sub>) δ 170.04, 158.09, 147.48, 145.05, 144.85, 143.30, 132.87, 131.96, 129.98, 127.90, 126.99, 121.97, 118.84, 101.42, 73.48, 71.87, 59.10, 55.82, 53.51, 42.51, 34.68, 27.43, 23.90, 23.03, 21.76, 21.17 ppm; IR (neat) 2945, 1743, 1621, 1509, 1359, 1230, 1029, 838 cm<sup>-1</sup>; HRMS (FAB) *m/z*: [M + H]<sup>+</sup> calcd for [C<sub>28</sub>H<sub>33</sub>N<sub>2</sub>O<sub>6</sub>S]<sup>+</sup> 525.2059; found 525.2053. [α]<sub>D</sub><sup>20</sup> = -5.80 (*c* 1.0, CHCl<sub>3</sub>).

**2-[(1*S*,3*R*,4*S*,6*S*)-6-[(*R*)-hydroxy(6-methoxyquinolin-4-yl)methyl]quinuclidin-3-yl]acetonitrile (**S6**)**

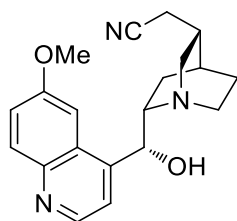

To a solution of a compound **S5** (80 mg, 0.153 mmol) in DMF (1 mL) was added sodium cyanide (15.0 mg, 0.305 mmol) and stirred at 80 °C for overnight. The resulting solution was

quenched with water, extracted with dichloromethane, washed with brine, dried over MgSO<sub>4</sub>, filtered and concentrated. To the crude in methanol (1.5 mL) was added potassium carbonate (105.7 mg, 0.765 mmol) and stirred for 2 h. The resulting mixture was quenched with water, extracted with dichloromethane, washed with brine, dried over MgSO<sub>4</sub>, filtered and concentrated. The crude was purified by column chromatography (silica gel, DCM : MeOH = 100:0 to 90:10) afford **S6** (37.2 mg, 0.110 mmol, 72%)

Clear sticky caramel; <sup>1</sup>H-NMR (400 MHz, CDCl<sub>3</sub>) δ 8.57 (d, *J* = 4.8 Hz, 1H), 7.93 (d, *J* = 9.2 Hz, 1H), 7.44 (d, *J* = 4.6 Hz, 1H), 7.30 (dd, *J* = 9.2, 2.8 Hz, 1H), 7.15 (d, *J* = 2.8 Hz, 1H), 5.49 (d, *J* = 4.1 Hz, 1H), 3.87 (s, 3H), 3.42-3.49 (m, 1H), 3.11-3.17 (m, 1H), 2.97-3.02 (m, 1H), 2.58-2.65 (m, 1H), 2.36-2.41 (m, 1H), 2.16-2.33 (m, 2H), 1.93-2.01 (m, 2H), 1.76-1.89 (m, 2H), 1.35-1.50 (m, 2H) ppm; <sup>13</sup>C-NMR (101 MHz, CDCl<sub>3</sub>) δ 157.92, 147.60, 147.42, 144.21, 131.66, 126.52, 121.60, 118.67, 118.36, 101.25, 77.44, 77.33, 77.11, 76.80, 71.95, 59.87, 57.16, 55.80, 42.89, 32.78, 27.69, 25.87, 21.90, 20.76 ppm; IR (neat) 2932, 2349, 1620, 1508, 1230, 1027, 772 cm<sup>-1</sup>; [α]<sub>D</sub><sup>20</sup> = -35.29 (*c* 1.0, CHCl<sub>3</sub>).

### 1,3-Bis(10-cyano-11-norquinnium-*N*-methyl)-2-fluorobenzene dibromide (**36**)

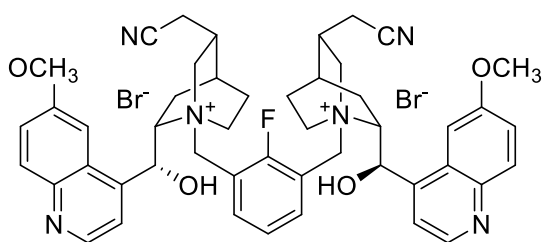

According to the procedure (A), from a compound **S6** (26.2 mg, 0.078 mmol) and 1,3-bis(bromomethyl)-2-fluorobenzene (10.7 mg 0.038 mmol), the compound **36** was obtained (23.1 mg, 0.024 mmol, 63%).

Brown solid; mp 202-203 °C (MeOH-Et<sub>2</sub>O, decomp.); <sup>1</sup>H-NMR (400 MHz, CD<sub>3</sub>OD) δ 8.80 (d, *J* = 5.0 Hz, 2H), 8.06 (d, *J* = 9.2 Hz, 2H), 7.99 (t, *J* = 7.3 Hz, 2H), 7.90 (d, *J* = 4.6 Hz, 2H), 7.63 (t, *J* = 7.6 Hz, 1H), 7.55 (dd, *J* = 9.2, 2.3 Hz, 2H), 7.48 (d, *J* = 2.3 Hz, 2H), 6.69 (s, 2H), 5.53 (d, *J* = 12.8 Hz, 2H), 4.86-4.83 (m, 2H), 4.65-4.65 (m, 4H), 4.44-4.41 (m, 2H), 4.14-3.99 (m, 8H), 3.60-3.53 (m, 2H), 2.65-2.54 (m, 4H), 2.52-2.46 (m, 2H), 2.35-2.34 (m, 2H), 2.19-2.19 (m, 2H), 2.04-2.02 (m, 2H), 1.88 (s, 2H), 1.71-1.68 (m, 2H) ppm; <sup>13</sup>C-NMR (101 MHz, CD<sub>3</sub>OD) δ 158.7, 147.0, 144.5, 143.5, 138.8, 130.5, 126.2, 126.1, 121.9, 120.3, 117.7, 116.4, 116.3, 101.5, 69.0, 64.7, 60.5, 57.9, 55.1, 52.1, 48.3, 48.1, 47.9, 47.7, 47.5, 47.2, 47.0, 31.5, 24.9, 22.9, 20.2, 19.5 ppm; IR (neat) 2349, 1621, 1509, 1240, 1032 cm<sup>-1</sup>; HRMS (FAB) *m/z*: [M - Br]<sup>+</sup> calcd for [C<sub>48</sub>H<sub>53</sub>BrFN<sub>6</sub>O<sub>4</sub>]<sup>+</sup> 875.3296; found 875.3304. [α]<sub>D</sub><sup>20</sup> = -20.97 (*c* 1.0, MeOH).

### 1,3-Bis(quininium-*N*-methyl)-2-fluorobenzene dichloride (**37**)

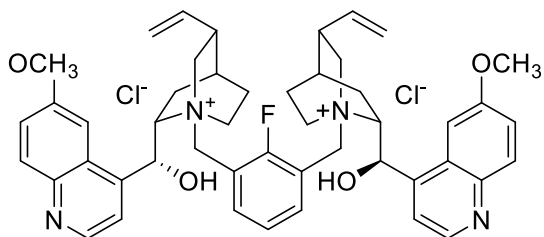

According to the procedure (**B**), from **13** (100.0 mg, 0.107 mmol) and hydrogen chloride (1 N aq. solution, 1 mL, 1.074 mmol), the compound **37** was obtained (67.0 mg, 0.080 mmol, 74%).

Ivory solid; mp 201-202 °C (MeOH-Et<sub>2</sub>O, decomp.); <sup>1</sup>H-NMR (400 MHz, CD<sub>3</sub>OD) δ 8.77 (d, *J* = 4.3 Hz, 2H), 7.98-8.04 (m, 4H), 7.87 (d, *J* = 4.3 Hz, 2H), 7.59 (t, *J* = 7.9 Hz, 1H), 7.52 (dd, *J* = 9.5, 2.8 Hz, 2H), 7.47 (d, *J* = 2.4 Hz, 2H), 6.65 (s, 2H), 5.75-5.84 (m, 2H), 5.50 (d, *J* = 11.6 Hz, 2H), 5.16 (d, *J* = 17.1 Hz, 2H), 5.06 (d, *J* = 10.4 Hz, 2H), 4.85-4.85 (m, 2H), 4.33-4.39 (m,

2H), 4.05 (s, 6H), 4.01-4.03 (m, 2H), 3.82-3.88 (m, 2H), 3.61-3.63 (m, 2H), 3.47-3.54 (m, 2H), 2.87-2.87 (m, 2H), 2.34-2.39 (m, 2H), 2.27-2.27 (m, 2H), 2.09-2.10 (m, 2H), 1.95-2.00 (m, 2H), 1.59-1.65 (m, 2H) ppm;  $^{13}\text{C}$ -NMR (101 MHz,  $\text{CD}_3\text{OD}$ )  $\delta$  160.08, 148.30, 145.92, 144.81, 140.06, 140.04, 138.73, 131.89, 127.48, 123.20, 121.54, 117.92, 117.78, 117.70, 102.76, 70.27, 66.18, 62.08, 58.99, 56.53, 54.83, 53.20, 39.43, 27.98, 25.99, 22.31 ppm; IR (neat) 1473, 1175, 1026, 769  $\text{cm}^{-1}$ ; HRMS (FAB)  $m/z$ :  $[\text{M} - \text{Cl}]^+$  calcd for  $[\text{C}_{48}\text{H}_{55}\text{ClFN}_4\text{O}_4]^+$  805.3896; found 805.3889.  $[\alpha]^{20}_{\text{D}} = -235.74$  ( $c$  1.0, MeOH).

### 1,3-Bis(quininium-*N*-methyl)-2-fluorobenzene diiodide(**38**)

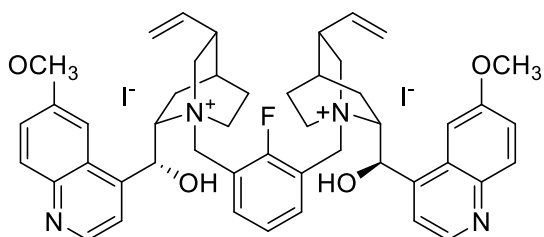

According to the procedure (**B**), from **13** (100.0 mg, 0.107 mmol) and hydrogen iodide (1 N aq. solution, 1 mL, 1.074 mmol), the compound **38** was obtained (29.1 mg, 0.028 mmol, 26%).

Yellow solid; mp 185-186 °C (MeOH-Et<sub>2</sub>O, decomp.);  $^1\text{H}$ -NMR (400 MHz,  $\text{DMSO-}d_6$ )  $\delta$  8.82 (d,  $J = 4.6$  Hz, 2H), 8.03 (d,  $J = 9.2$  Hz, 2H), 7.98 (t,  $J = 7.3$  Hz, 2H), 7.76 (d,  $J = 4.6$  Hz, 2H), 7.62 (t,  $J = 7.8$  Hz, 1H), 7.51 (dd,  $J = 9.2, 2.8$  Hz, 2H), 7.41 (d,  $J = 2.8$  Hz, 2H), 6.71 (d,  $J = 3.7$  Hz, 2H), 6.59 (d,  $J = 2.8$  Hz, 2H), 5.84-5.75 (m, 2H), 5.51 (d,  $J = 12.8$  Hz, 2H), 5.10 (d,  $J = 17.4$  Hz, 2H), 5.02 (d,  $J = 10.1$  Hz, 2H), 4.75 (d,  $J = 12.8$  Hz, 2H), 4.16-4.10 (m, 2H), 4.01 (s, 6H), 3.97-3.97 (m, 2H), 3.73-3.71 (m, 2H), 3.65-3.65 (m, 2H), 3.50-3.47 (m, 2H), 2.87-2.85 (m, 2H), 2.25-2.21 (m, 2H), 2.12-2.08 (m, 2H), 2.04-2.04 (m, 2H), 1.90-1.85 (m, 2H), 1.50-1.44 (m, 2H) ppm;  $^{13}\text{C}$ -NMR (101 MHz,  $\text{DMSO-}d_6$ )  $\delta$  157.9, 148.0, 144.3, 144.2, 139.0, 138.5,



132.0, 126.3, 125.9, 122.0, 120.8, 117.1, 117.0, 116.8, 102.8, 68.8, 64.5, 59.5, 57.5, 56.1, 51.3, 37.7, 26.3, 24.6, 21.0 ppm; IR (neat) 1621, 1509, 1259, 1038, 769  $\text{cm}^{-1}$ ; HRMS (FAB)  $m/z$ :  $[M - I]^+$  calcd for  $[\text{C}_{48}\text{H}_{55}\text{FIN}_4\text{O}_4]^+$  897.3247; found 897.3271.  $[\alpha]_{\text{D}}^{20} = -150.41$  ( $c$  1.0, DMSO).

### 1,3-Bis(quininium-*N*-methyl)-2-fluorobenzene di(hydrogen sulfate) (**39**)

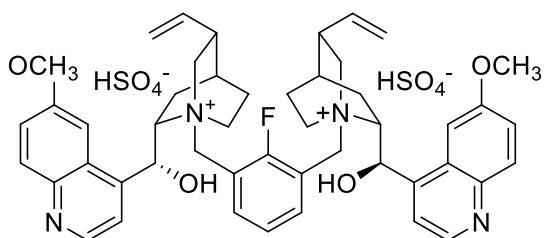

According to the procedure (**B**), from **13** (100.0 mg, 0.107 mmol) and sulfuric acid (1 N aq. solution, 1 mL, 1.074 mmol), the compound **39** was obtained (95.2 mg, 0.099 mmol, 92%).

White solid; mp 199-200 °C (MeOH-Et<sub>2</sub>O, decomp.); <sup>1</sup>H-NMR (400 MHz, CD<sub>3</sub>OD)  $\delta$  8.79 (d,  $J = 5.0$  Hz, 2H), 8.10-8.03 (m, 6H), 7.59 (t,  $J = 7.8$  Hz, 1H), 7.49 (dd,  $J = 9.2, 2.3$  Hz, 2H), 7.46 (s, 2H), 6.83 (s, 2H), 5.81-5.74 (m, 2H), 5.70 (d,  $J = 15.1$  Hz, 2H), 5.16 (d,  $J = 17.0$  Hz, 2H), 5.06 (d,  $J = 10.5$  Hz, 2H), 4.82-4.82 (m, 2H), 4.52-4.49 (m, 2H), 4.08 (s, 6H), 3.99-3.93 (m, 2H), 3.72-3.69 (m, 2H), 3.59-3.58 (m, 2H), 3.46-3.45 (m, 2H), 2.83-2.81 (m, 2H), 2.32-2.28 (m, 4H), 2.09-2.09 (m, 2H), 2.00-1.93 (m, 2H), 1.57-1.52 (m, 2H) ppm; <sup>13</sup>C-NMR (101 MHz, CD<sub>3</sub>OD)  $\delta$  159.5, 149.6, 143.9, 138.8, 138.6, 137.4, 127.2, 126.4, 125.8, 124.0, 120.6, 116.5, 116.4, 101.7, 69.0, 64.8, 60.7, 57.8, 55.5, 51.7, 38.0, 26.6, 24.6, 20.9 ppm; IR (neat) 1621, 1509, 1472, 1240, 1032, 829  $\text{cm}^{-1}$ ; HRMS (FAB)  $m/z$ :  $[M - \text{HSO}_4]^+$  calcd for  $[\text{C}_{48}\text{H}_{56}\text{FN}_4\text{O}_8\text{S}]^+$  867.3803; found 867.3794.  $[\alpha]_{\text{D}}^{20} = -42.40$  ( $c$  1.0, MeOH).

### 1,3-Bis(quininium-*N*-methyl)-2-fluorobenzene di(tetrafluoroborate) (**40**)

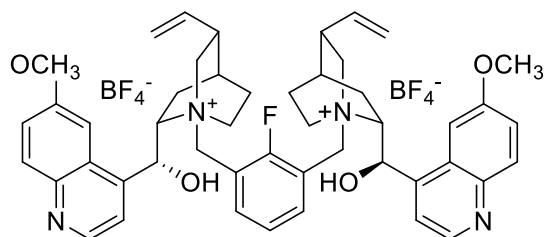

A mixture of **13** (50.0 mg, 0.054 mmol) and sodium tetrafluoroborate (17.7 mg, 0.161 mmol) in acetonitrile (1 mL) was stirred for overnight. The resulting suspension was filtered and washed with methanol and water. The solid was dried *in vacuo*. The compound **40** was obtained (43.1 mg, 0.046 mmol, 85%).

White solid; mp 228-229 °C (MeOH-Et<sub>2</sub>O, decomp.); <sup>1</sup>H-NMR (400 MHz, DMSO-*d*<sub>6</sub>) δ 8.81 (d, *J* = 4.6 Hz, 2H), 8.03-7.97 (m, 4H), 7.76 (d, *J* = 4.6 Hz, 2H), 7.59 (t, *J* = 7.6 Hz, 1H), 7.50 (dd, *J* = 9.2, 2.8 Hz, 2H), 7.40 (d, *J* = 2.3 Hz, 2H), 6.92 (s, 2H), 6.59 (s, 2H), 5.82-5.73 (m, 2H), 5.53 (d, *J* = 12.8 Hz, 2H), 5.10 (d, *J* = 17.0 Hz, 2H), 5.02 (d, *J* = 10.5 Hz, 2H), 4.77 (d, *J* = 12.4 Hz, 2H), 4.18-4.18 (m, 2H), 4.02-4.02 (m, 2H), 4.00 (s, 6H), 3.67-3.61 (m, 4H), 3.33-3.31 (m, 2H), 2.76-2.74 (m, 2H), 2.23-2.07 (m, 4H), 2.02-2.02 (m, 2H), 1.83-1.83 (m, 2H), 1.49-1.43 (m, 2H) ppm; <sup>13</sup>C-NMR (101 MHz, DMSO-*d*<sub>6</sub>) δ 157.9, 148.0, 144.4, 144.2, 138.9, 138.5, 131.9, 126.1, 125.9, 122.1, 120.8, 117.2, 117.0, 116.9, 102.7, 68.7, 64.4, 59.6, 57.4, 56.0, 51.3, 37.8, 26.3, 24.8, 21.0 ppm; IR (neat) 1748, 1508, 1362, 1227, 1032, 772 cm<sup>-1</sup>; HRMS (FAB) *m/z*: [M - BF<sub>4</sub>]<sup>+</sup> calcd for [C<sub>48</sub>H<sub>55</sub>BF<sub>5</sub>N<sub>4</sub>O<sub>4</sub>]<sup>+</sup> 857.4239; found 857.4222. [α]<sub>D</sub><sup>20</sup> = -47.92 (*c* 1.0, DMSO).

### 1,3-Bis(quininium-*N*-methyl)-2-fluorobenzene di(trifluoromethylacetate) (**41**)

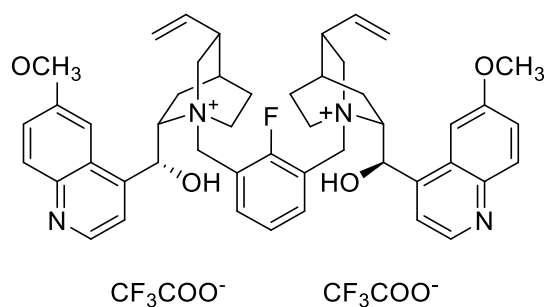

According to the procedure **(B)**, from **13** (100.0 mg, 0.107 mmol) and trifluoroacetic acid (0.08 mL, 1.074 mmol), the compound **41** was obtained (91.1 mg, 0.091 mmol, 85%).

Ivory solid; mp 208-209 °C (MeOH-Et<sub>2</sub>O, decomp.); <sup>1</sup>H-NMR (400 MHz, CD<sub>3</sub>OD) δ 8.79 (d, *J* = 4.6 Hz, 2H), 8.05 (d, *J* = 9.2 Hz, 2H), 8.00 (t, *J* = 7.4 Hz, 2H), 7.90 (d, *J* = 4.1 Hz, 2H), 7.62 (t, *J* = 7.8 Hz, 1H), 7.55 (dd, *J* = 9.4, 2.5 Hz, 2H), 7.45 (d, *J* = 2.8 Hz, 2H), 6.67 (s, 2H), 5.82-5.73 (m, 2H), 5.53 (d, *J* = 12.9 Hz, 2H), 5.16 (d, *J* = 17.0 Hz, 2H), 5.08 (d, *J* = 10.6 Hz, 2H), 4.85-4.85 (m, 2H), 4.47-4.42 (m, 2H), 4.04 (s, 6H), 4.01-4.01 (m, 2H), 3.74-3.60 (m, 4H), 3.42-3.36 (m, 2H), 2.80-2.78 (m, 2H), 2.41-2.29 (m, 4H), 2.12-2.12 (m, 2H), 1.96-1.91 (m, 2H), 1.62-1.56 (m, 2H) ppm; <sup>13</sup>C-NMR (101 MHz, CD<sub>3</sub>OD) δ 162.9 (q, *J* = 34.4 Hz), 160.1, 148.3, 145.9, 144.7, 140.0, 138.6, 131.9, 127.4, 127.3, 123.1, 121.6, 118.2 (q, *J* = 293.2 Hz), 117.9, 117.8, 117.7, 102.7, 70.4, 66.2, 62.1, 58.9, 56.4, 53.2, 49.8, 49.7, 49.6, 49.5, 49.4, 49.3, 49.2, 49.1, 49.0, 48.8, 48.6, 48.4, 39.4, 27.9, 26.0, 22.3 ppm; IR (neat) 1671, 1509, 1200, 1131, 1032, 721 cm<sup>-1</sup>; HRMS (FAB) *m/z*: [*M* - C<sub>2</sub>F<sub>3</sub>O<sub>2</sub>]<sup>+</sup> calcd for [C<sub>50</sub>H<sub>55</sub>F<sub>4</sub>N<sub>4</sub>O<sub>6</sub>]<sup>+</sup> 883.4058; found 883.4072. [ $\alpha$ ]<sub>D</sub><sup>20</sup> = -39.97 (*c* 1.0, MeOH).

### 1,3-Bis(quininium-*N*-methyl)-2-fluorobenzene dibenzoate (**42**)

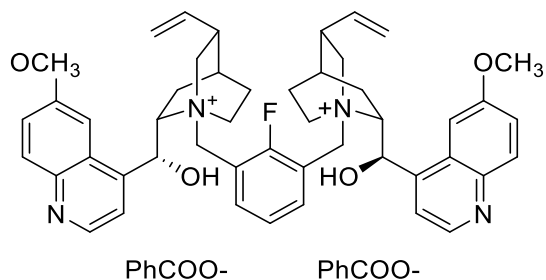

According to the procedure (**B**), from **13** (100.0 mg, 0.107 mmol) and benzoic acid (131.2 mg, 1.074 mmol), the compound **42** was obtained (105.1 mg, 0.104 mmol, 97%).

Brown solid; mp 166-167 °C (MeOH-Et<sub>2</sub>O, decomp.); <sup>1</sup>H-NMR (400 MHz, CD<sub>3</sub>OD) δ 8.77 (d, *J* = 4.6 Hz, 2H), 8.04 (d, *J* = 9.2 Hz, 2H), 7.98 (t, *J* = 7.3 Hz, 2H), 7.91-7.88 (m, 6H), 7.59 (t, *J* = 7.8 Hz, 1H), 7.53 (dd, *J* = 9.4, 2.5 Hz, 2H), 7.45 (d, *J* = 2.8 Hz, 2H), 7.42 (tt, *J* = 7.3, 1.8 Hz, 2H), 7.36-7.31 (m, 4H), 6.70 (s, 2H), 5.80-5.72 (m, 2H), 5.56 (d, *J* = 13.3 Hz, 2H), 5.14 (d, *J* = 17.0 Hz, 2H), 5.07 (d, *J* = 10.5 Hz, 2H), 4.84 (d, *J* = 12.8 Hz, 2H), 4.47-4.42 (m, 2H), 4.01 (s, 6H), 4.01-3.98 (m, 2H), 3.69-3.59 (m, 4H), 3.36-3.33 (m, 2H), 2.76-2.74 (m, 2H), 2.40-2.29 (m, 4H), 2.10-2.09 (m, 2H), 1.91-1.88 (m, 2H), 1.60-1.54 (m, 2H) ppm; <sup>13</sup>C-NMR (101 MHz, CD<sub>3</sub>OD) δ 172.6, 158.7, 147.0, 144.7, 143.4, 138.7, 137.3, 135.9, 130.6, 129.0, 127.6, 126.1, 125.9, 121.6, 120.3, 116.7, 116.5, 116.4, 101.6, 69.2, 64.7, 60.7, 57.5, 55.0, 51.8, 38.1, 26.5, 24.7, 21.0 ppm; IR (neat) 1621, 1509, 1240, 1032, 721 cm<sup>-1</sup>; HRMS (ESI) *m/z*: [M + Na]<sup>+</sup> calcd for [C<sub>62</sub>H<sub>65</sub>FN<sub>4</sub>O<sub>8</sub>Na]<sup>+</sup> 1035.4679; found 1035.4736. [α]<sub>D</sub><sup>20</sup> = -37.85 (*c* 1.0, MeOH).

### 1,3-Bis(quininium-*N*-methyl)-2-fluorobenzene di(2,6-dimethylbenzoate) (**43**)

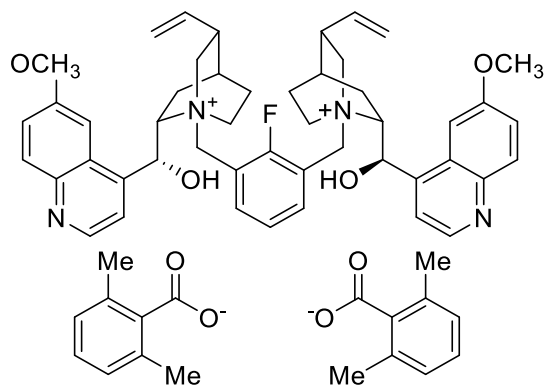

According to the procedure (B), from **13** (100.0 mg, 0.107 mmol) and 2,6-dimethyl benzoic acid (161.3 mg, 1.074 mmol), the compound **43** was obtained (114.0 mg, 0.107 mmol, 99%)

Ivory solid; mp 175-176 °C (MeOH-Et<sub>2</sub>O, decomp.); <sup>1</sup>H-NMR (400 MHz, CD<sub>3</sub>OD) δ 8.77 (d, *J* = 4.6 Hz, 2H), 8.04 (t, *J* = 7.3 Hz, 4H), 7.88 (d, *J* = 4.6 Hz, 2H), 7.65 (t, *J* = 7.8 Hz, 1H), 7.56 (dd, *J* = 9.4, 2.5 Hz, 2H), 7.41 (d, *J* = 2.8 Hz, 2H), 6.96 (dd, *J* = 8.5, 6.6 Hz, 2H), 6.88 (d, *J* = 7.3 Hz, 4H), 6.62 (s, 2H), 5.81-5.73 (m, 2H), 5.59 (d, *J* = 12.8 Hz, 2H), 5.16 (d, *J* = 17.0 Hz, 2H), 5.09 (d, *J* = 10.1 Hz, 2H), 4.83 (d, *J* = 12.8 Hz, 2H), 4.54-4.49 (m, 2H), 4.03 (s, 6H), 4.00-3.98 (m, 2H), 3.65-3.62 (m, 4H), 3.36-3.34 (m, 2H), 2.76-2.74 (m, 2H), 2.40-2.33 (m, 4H), 2.24 (s, 12H), 2.11-2.11 (m, 2H), 1.89-1.89 (m, 2H), 1.56-1.56 (m, 2H) ppm; <sup>13</sup>C-NMR (101 MHz, CD<sub>3</sub>OD) δ 178.6, 159.7, 148.1, 145.7, 144.4, 143.4, 139.7, 138.3, 132.9, 131.7, 127.6, 127.2, 127.1, 122.5, 121.4, 117.7, 117.6, 117.5, 102.7, 70.3, 65.7, 61.7, 58.5, 56.1, 52.8, 39.2, 27.6, 25.7, 22.0, 19.5 ppm; IR (neat) 1624, 1511, 1241, 1026 cm<sup>-1</sup>; HRMS (ESI) *m/z*: [M + Na]<sup>+</sup> calcd for [C<sub>57</sub>H<sub>64</sub>FN<sub>4</sub>O<sub>6</sub>]<sup>+</sup> 769.4129; found 769.4158. [α]<sub>D</sub><sup>20</sup> = -37.07 (*c* 1.0, MeOH).

### 1,3-Bis(quinidinium-N-methyl)-2-fluorobenzene dibromide (**44**)

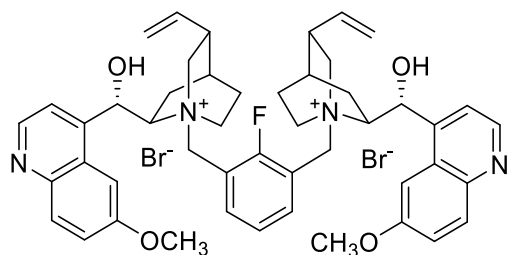

According to the procedure (A), from quinidine (100.0 mg 0.308 mmol) and 1,3-bis(bromomethyl)-2-fluorobenzene (42.4 mg, 0.150 mmol), the compound **44** was obtained (132.7 mg, 0.134 mmol, 89%).

White solid; mp 194-195 °C (MeOH-Et<sub>2</sub>O, decomp.); <sup>1</sup>H-NMR (400 MHz, CD<sub>3</sub>OD) δ 8.79 (d, *J* = 4.6 Hz, 2H), 8.11 (d, *J* = 7.8 Hz, 2H), 8.02-8.04 (m, 2H), 7.93 (d, *J* = 5.0 Hz, 2H), 7.79 (t, *J* = 7.6 Hz, 1H), 7.50-7.55 (m, 4H), 6.72 (s, 2H), 6.04-6.13 (m, 2H), 5.65 (d, *J* = 12.8 Hz, 2H), 5.22-5.30 (m, 4H), 5.14-5.19 (m, 2H), 4.54-4.59 (m, 2H), 4.13 (s, 6H), 4.05-4.12 (m, 2H), 3.70-3.83 (m, 4H), 2.85-2.91 (m, 2H), 2.52-2.58 (m, 2H), 1.84-2.04 (m, 6H), 1.12-1.20 (m, 2H) ppm; <sup>13</sup>C-NMR (101 MHz, CD<sub>3</sub>OD) δ 158.77, 146.91, 144.35, 143.44, 138.67, 136.60, 133.58, 130.43, 130.02, 128.74, 126.12, 122.03, 120.22, 116.56, 101.37, 68.31, 65.96, 63.78, 56.87, 55.39, 55.32, 37.63, 26.85, 23.43, 21.16 ppm; IR (neat) 1621, 1509, 1241, 1032, 829 cm<sup>-1</sup>; HRMS (ESI) *m/z*: [M + Na]<sup>+</sup> calcd for [C<sub>48</sub>H<sub>55</sub>Br<sub>2</sub>FN<sub>4</sub>O<sub>4</sub>]<sup>+</sup> 952.2499; found 952.2444. [α]<sub>D</sub><sup>20</sup> = +52.58 (*c* 1.0, MeOH).

***Procedure for 1,3-Bis(3-epivinyln-quinidinium-N-methyl)-2-fluorobenzene dibromide (45)***

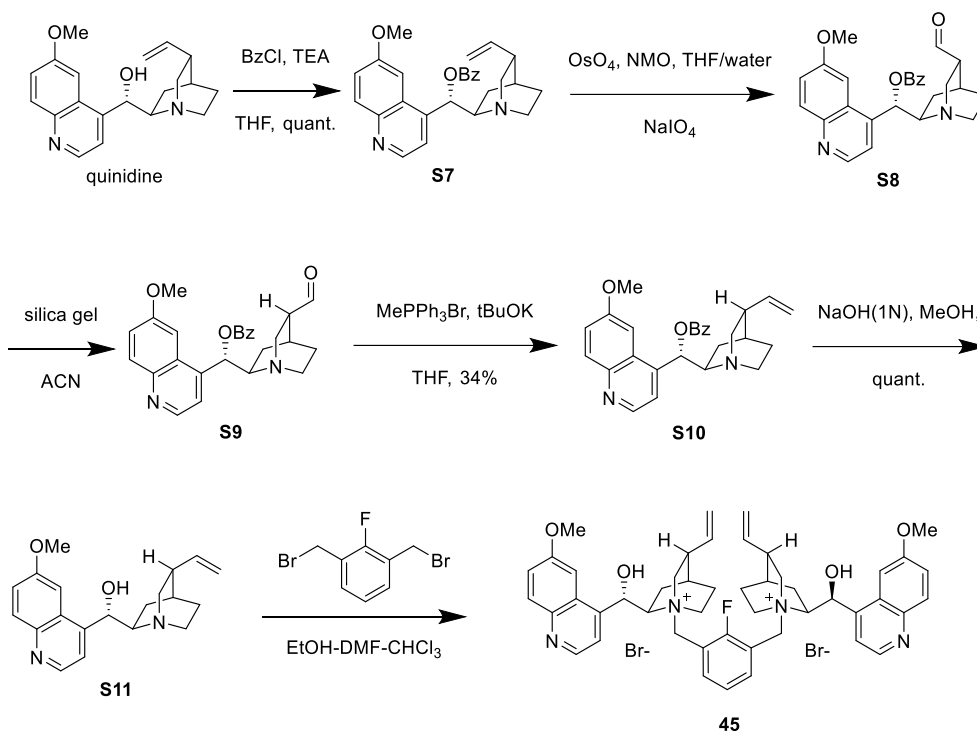

**(S)-(6-methoxyquinolin-4-yl)[(1S,2R,4S,5R)-5-vinylquinuclidin-2-yl]methyl benzoate (S7)**

To a mixture of quinidine (2.0 g, 6.169 mmol) and trimethylamine (4.3 mL, 30.847 mmol) in dry THF (20 mL) was added benzoyl chloride (1.09 mL, 9.254 mmol) over 5 min at 0 °C and the reaction mixture was stirred for 2 h at rt. The resulting solution was quenched with water, extracted with dichloromethane, washed with ammonia water and brine, dried over MgSO<sub>4</sub>, filtered and concentrated. The compound **S7** was obtained and used for without further purification.

**(S)-[(1S,2R,4S,5R)-5-formylquinuclidin-2-yl](6-methoxyquinolin-4-yl)methyl benzoate (S8)**

To a mixture of **S7** (2.64 g, 6.169 mmol) and N-methylmorpholine N-oxide (795 mg, 6.786 mmol) in THF/water (4:1, 30 mL) was added OsO<sub>4</sub> (in 2.5% *t*BuOH, 1.56 mL, 0.154 mmol) and stirred for overnight. To the resulting diol, was added NaIO<sub>4</sub> (3.95 g, 18.5 mmol) and stirred

for 2 h. The crude mixture was quenched with sodium bisulfite sat. solution and stirred for 30 min. The resulting solution was extracted with dichloromethane, washed with brine, dried over MgSO<sub>4</sub>, filtered and concentrated. The crude was used for next step without further purification.

**(S)-[(1S,2R,4S,5S)-5-formylquinuclidin-2-yl](6-methoxyquinolin-4-yl)methyl benzoate (S9)**

A suspension of **S8** (900 mg, 2.091 mmol) and silica gel (3 g) in acetonitrile (40 mL) was stirred vigorously for overnight to racemization. The reaction was monitored by <sup>1</sup>H NMR. The crude was filtered to remove the silica gel and concentrated *in vacuo*. The mixture was purified by column chromatography (silica gel, EA : MeOH = 100:0 to 95:5) to afford **S9** (350 mg, 0.813 mmol, 39%). The TLC up spot was 3-epimer **S9** and down spot was normal form **S8**.

upspot 3-epi-**S9** : a sticky caramel; <sup>1</sup>H-NMR (400 MHz, CDCl<sub>3</sub>) δ 9.78 (s, 1H), 8.71 (d, *J* = 4.6 Hz, 1H), 8.08-8.06 (m, 2H), 8.01 (d, *J* = 9.2 Hz, 1H), 7.62-7.58 (m, 1H), 7.49-7.44 (m, 3H), 7.39-7.36 (m, 2H), 6.75 (d, *J* = 6.0 Hz, 1H), 3.96 (s, 3H), 3.54-3.47 (m, 1H), 3.33-3.28 (m, 1H), 3.23-3.16 (m, 1H), 2.79-2.72 (m, 2H), 2.65-2.62 (m, 1H), 2.48-2.48 (m, 1H), 1.99-1.94 (m, 1H), 1.88-1.82 (m, 1H), 1.48-1.40 (m, 2H) ppm; <sup>13</sup>C-NMR (101 MHz, CDCl<sub>3</sub>) δ 203.45, 171.26, 165.37, 158.25, 147.44, 144.76, 143.41, 133.75, 131.93, 129.67, 128.85, 126.76, 122.15, 118.28, 101.33, 74.36, 60.49, 59.04, 55.86, 50.12, 49.57, 42.41, 29.00, 23.73, 21.51, 21.15, 14.28 ppm; IR (neat) 1746, 1620, 1509, 1263, 1108, 712 cm<sup>-1</sup>; [α]<sub>D</sub><sup>20</sup> = -27.29 (*c* 1.0, CHCl<sub>3</sub>).

downspot **S8** : a white solid; mp 75-76 °C; <sup>1</sup>H-NMR (400 MHz, CDCl<sub>3</sub>) δ 9.82 (s, 1H), 8.69 (t, *J* = 4.8 Hz, 1H), 8.06-8.08 (m, 2H), 7.99 (d, *J* = 9.2 Hz, 1H), 7.63 (d, *J* = 2.8 Hz, 1H), 7.55-7.59 (m, 1H), 7.45 (t, *J* = 7.6 Hz, 2H), 7.35-7.39 (m, 2H), 6.79 (d, *J* = 6.9 Hz, 1H), 4.03 (s, 3H), 3.71-3.76 (m, 1H), 3.36-3.43 (m, 1H), 2.90-2.95 (m, 1H), 2.72-2.80 (m, 2H), 2.50-2.54 (m,



1H), 2.46-2.46 (m, 1H), 1.65-1.71 (m, 4H) ppm <sup>13</sup>C-NMR (101 MHz, CDCl<sub>3</sub>) δ 203.15, 165.51, 158.25, 147.43, 144.74, 143.70, 133.57, 131.81, 129.91, 129.59, 128.66, 127.08, 122.36, 118.47, 101.24, 73.97, 59.08, 55.90, 50.39, 49.10, 42.45, 25.82, 25.12, 23.41 ppm

**(S)-(6-methoxyquinolin-4-yl)[(1S,2R,4S,5S)-5-vinylquinuclidin-2-yl]methyl benzoate**  
**(S10)**

To a suspension of methyltriphenylphosphonium bromide (187.6 mg 0.515 mmol) in dry THF (5 mL) was added potassium *tert*-butoxide (62.9 mg 0.515 mmol) at 0 °C and stirred for 1 h. To the yellow suspension was added **S9** in dry DCM (2.5 mL) at -78 °C and stirred for 2 h. The resulting solution was quenched with water, extracted with dichloromethane, washed with brine, dried over MgSO<sub>4</sub>, filtered and concentrated. The crude was purified by column chromatography (silica gel, DCM : MeOH = 100:0 to 95:5) to afford **S10** (50.0 mg, 0.117 mmol, 34%).

Sticky caramel; <sup>1</sup>H-NMR (400 MHz, CDCl<sub>3</sub>) δ 8.70 (d, *J* = 4.1 Hz, 1H), 8.08-8.10 (m, 2H), 8.00 (d, *J* = 9.2 Hz, 1H), 7.58 (t, *J* = 7.6 Hz, 1H), 7.49 (d, *J* = 2.3 Hz, 1H), 7.46 (t, *J* = 7.8 Hz, 2H), 7.41 (d, *J* = 4.6 Hz, 1H), 7.36 (dd, *J* = 9.2, 2.8 Hz, 1H), 6.77 (d, *J* = 5.5 Hz, 1H), 5.83-5.92 (m, 1H), 5.01-5.06 (m, 2H), 3.96 (s, 3H), 3.49-3.54 (m, 1H), 3.38-3.44 (m, 1H), 2.76-2.82 (m, 2H), 2.54-2.59 (m, 1H), 2.47-2.47 (m, 1H), 1.71-2.02 (m, 4H), 1.31-1.39 (m, 1H) ppm; <sup>13</sup>C-NMR (101 MHz, CDCl<sub>3</sub>) δ 165.55, 158.11, 147.56, 144.87, 143.63, 141.57, 133.62, 131.98, 129.80, 129.74, 128.77, 126.92, 122.05, 118.60, 114.82, 101.44, 74.65, 58.83, 55.85, 50.96, 49.44, 40.83, 30.09, 27.83, 20.52 ppm; IR (neat) 1723, 1620, 1508, 1263, 1108, 711 cm<sup>-1</sup>; [α]<sub>D</sub><sup>20</sup> = -101.29 (*c* 1.0, CHCl<sub>3</sub>).

### 3-Epivinyln-quinidine (S11)

To a solution of **S10** (43.5 mg, 0.102 mmol) in MeOH (1 mL) was added NaOH (1N aq. solution, 1 mL) and stirred for 2h. The resulting solution was extracted with dichloromethane, washed with brine, dried over Na<sub>2</sub>SO<sub>4</sub>, filtered and concentrated. The crude was purified by column chromatography (silica gel, DCM : MeOH = 100:0 to 90:10) to afford **S11** (23.2 mg, 0.072 mmol, 70%)

White solid; mp 57-58 °C; <sup>1</sup>H-NMR (400 MHz, CDCl<sub>3</sub>) δ 8.54 (d, *J* = 4.6 Hz, 1H), 7.87 (d, *J* = 9.2 Hz, 1H), 7.50 (d, *J* = 4.6 Hz, 1H), 7.21-7.23 (m, 1H), 7.11 (d, *J* = 2.8 Hz, 1H), 5.83 (d, *J* = 7.3 Hz, 1H), 5.66 (s, 1H), 5.00-5.05 (m, 2H), 3.77 (s, 3H), 3.74-3.82 (m, 1H), 3.09-3.14 (m, 1H), 2.79-2.82 (m, 2H), 2.47-2.57 (m, 2H), 1.87-1.92 (m, 1H), 1.79-1.79 (m, 1H), 1.66-1.73 (m, 1H), 1.22-1.33 (m, 2H) ppm; <sup>13</sup>C-NMR (101 MHz, CDCl<sub>3</sub>) δ 157.79, 147.55, 147.50, 144.06, 141.52, 131.48, 126.40, 121.54, 118.57, 114.76, 101.15, 71.00, 59.26, 55.75, 50.95, 49.84, 40.02, 27.88, 27.05, 20.26 ppm; IR (neat) 1620, 1509, 1240, 1030, 756 cm<sup>-1</sup>; HRMS (FAB) m/z: [M + H]<sup>+</sup> calcd for [C<sub>20</sub>H<sub>25</sub>N<sub>2</sub>O<sub>2</sub>]<sup>+</sup> 325.1916; found 325.1914. [α]<sub>D</sub><sup>20</sup> = +113.83 (*c* 1.0, CHCl<sub>3</sub>).

### 1,3-Bis(3-epivinyln-quinidinium-*N*-methyl)-2-fluorobenzene dibromide (45)

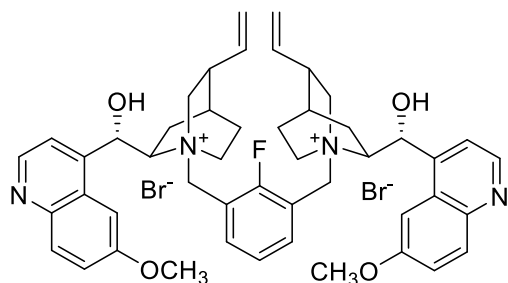

According to the procedure (A), from **S11** (21.9 mg, 0.068 mmol) and 1,3-bis(bromomethyl)-

2-fluorobenzene (9.3 mg 0.033 mmol), the compound **45** was obtained (17.0 mg, 0.017 mmol, 52%).

White solid; mp 201-202 °C (MeOH-Et<sub>2</sub>O, decomp.); <sup>1</sup>H-NMR (400 MHz, CD<sub>3</sub>OD) δ 8.78 (d, *J* = 4.6 Hz, 2H), 8.04-8.00 (m, 4H), 7.91 (d, *J* = 4.6 Hz, 2H), 7.63 (t, *J* = 7.6 Hz, 1H), 7.53 (dd, *J* = 9.4, 2.5 Hz, 2H), 7.42 (d, *J* = 2.8 Hz, 2H), 6.67 (s, 2H), 5.93-5.84 (m, 2H), 5.48 (d, *J* = 13.3 Hz, 2H), 5.13-5.09 (m, 4H), 4.84 (d, *J* = 13.3 Hz, 2H), 4.74-4.68 (m, 2H), 4.15-4.10 (m, 2H), 4.05 (s, 6H), 3.78-3.78 (m, 2H), 3.41-3.37 (m, 2H), 3.10-3.07 (m, 4H), 2.48-2.43 (m, 2H), 2.06-1.99 (m, 4H), 1.82-1.79 (m, 2H), 1.53-1.46 (m, 2H) ppm; <sup>13</sup>C-NMR (101 MHz, CD<sub>3</sub>OD) δ 158.8, 147.0, 144.4, 143.4, 138.6, 137.9, 130.6, 126.0, 121.8, 120.3, 116.5, 116.5, 101.4, 68.6, 64.9, 57.9, 57.3, 57.1, 55.1, 38.8, 26.7, 26.4, 18.7 ppm; IR (neat) 1620, 1509, 1241, 1025, 769 cm<sup>-1</sup>; HRMS (FAB) *m/z*: [M - Br]<sup>+</sup> calcd for [C<sub>48</sub>H<sub>55</sub>BrFN<sub>4</sub>O<sub>4</sub>]<sup>+</sup> 849.3391; found 849.3381. [α]<sub>D</sub><sup>20</sup> = +92.84 (*c* 1.0, MeOH).

### Procedure of Enantioselective PTC Epoxidation (C)

To a mixture of chalcone **1a** (25 mg, 0.120 mmol), chiral catalyst **13** (1.2 mg, 0.0012 mmol), *N-tert*-Butyl- $\alpha$ -phenylnitron (2.1 mg, 0.012 mmol) and Span 20 (1% iPr<sub>2</sub>O solution, 8.4  $\mu$ L, 0.00024 mmol) in isopropyl ether (0.4 mL) was added 30% aqueous hydrogen peroxide (0.14 mL, 1.2 mmol) and 50% aqueous KOH (0.014 mL, 0.12 mmol) was added, and the reaction mixture was stirred vigorously at room temperature until starting material had been consumed. The suspension was diluted with ether (10 mL), washed with water (2 x 5 mL), dried over MgSO<sub>4</sub>, filtered and concentrated *in vacuo*. Purification of residue by flash column chromatography on silica gel (hexanes : EtOAc = 50 : 1) afforded the desired product **2a** (26.9 mg, >99% yield) as a white solid. The enantioselectivity was determined by chiral HPLC

analysis (DAICEL Chiralpak AD, hexanes : ethanol = 90 : 10, flow rate = 1.0 mL/min, 23 °C,  $\lambda = 254$  nm, retention times; 18.16 min(minor), 27.24 min(major), >99% ee). The absolute configuration was determined by comparison of the HPLC retention time with the reported data.

### Phenyl[(2*S*,3*R*)-3-phenyloxiran-2-yl]methanone (**2a**)

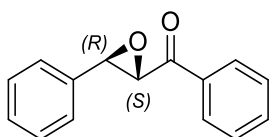

According to the procedure (C), the compound **2a** was obtained (26.6 mg, 0.119 mmol, 99%). White solid; mp 61-62 °C;  $^1\text{H-NMR}$  (400 MHz,  $\text{CDCl}_3$ )  $\delta$  8.00 (dd,  $J = 8.3, 1.4$  Hz, 2H), 7.61 (t,  $J = 7.6$  Hz, 1H), 7.47 (t,  $J = 7.8$  Hz, 2H), 7.35-7.41 (m, 5H), 4.29 (d,  $J = 1.8$  Hz, 1H), 4.06 (d,  $J = 1.8$  Hz, 1H) ppm;  $^{13}\text{C-NMR}$  (101 MHz,  $\text{CDCl}_3$ )  $\delta$  193.19, 135.56, 134.13, 129.18, 128.99, 128.89, 128.46, 125.90, 61.12, 59.51 ppm; IR (neat) 1689, 1231, 696  $\text{cm}^{-1}$ ; The enantioselectivity was determined by chiral HPLC analysis (DAICEL Chiralpak AD-H, hexane : ethanol = 90 : 10, flow rate = 1.0 mL/min, 23 °C,  $\lambda = 250$  nm) retention time: minor isomer 18.16 min, major isomer 27.24 min, 99% ee,  $[\alpha]_D^{20} = +229.30$  ( $c$  1.0,  $\text{CHCl}_3$ ). The configuration of the major enantiomer is (2*S*,3*R*), determined by comparison with literature data<sup>[2],[15]</sup>.

### (4-Fluorophenyl)[(2*S*,3*R*)-3-phenyloxiran-2-yl]methanone (**2b**)

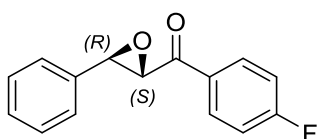

According to the procedure (C), the compound **2b** was obtained (27.4 mg, 0.113 mmol, 94%).

White solid; mp 77-78 °C; <sup>1</sup>H-NMR (400 MHz, CDCl<sub>3</sub>) δ 8.09-8.04 (m, 2H), 7.43-7.35 (m, 5H), 7.19-7.14 (m, 2H), 4.24 (d, *J* = 2.3 Hz, 1H), 4.08 (d, *J* = 1.8 Hz, 1H) ppm; <sup>13</sup>C-NMR (101 MHz, CDCl<sub>3</sub>) δ 191.6, 167.5, 164.9, 135.3, 131.9, 131.8, 131.2, 131.1, 129.1, 128.8, 125.8, 116.2, 116.0, 61.0, 59.3 ppm; IR (neat) 1688, 1231, 1157 cm<sup>-1</sup>; HRMS (FAB) *m/z*: [M + H]<sup>+</sup> calcd for [C<sub>15</sub>H<sub>12</sub>FO<sub>2</sub>]<sup>+</sup> 243.0821; found 243.0822. The enantioselectivity was determined by chiral HPLC analysis (DAICEL Chiralpak AD-H, hexane : 2-isopropanol = 90 : 10, flow rate = 1.0 mL/min, 23 °C, λ = 250 nm) retention time: minor isomer 11.69 min, major isomer 13.98 min, 97% ee, [α]<sub>D</sub><sup>20</sup> = +207.66 (*c* 1.0, CHCl<sub>3</sub>) The configuration of the major enantiomer is (2*S*,3*R*), determined by comparison with literature data<sup>[15],[16]</sup>

#### (4-Chlorophenyl)[(2*S*,3*R*)-3-phenyloxiran-2-yl]methanone (**2c**)

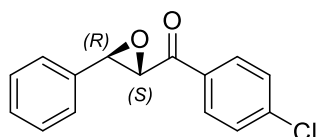

According to the procedure (C), the compound **2c** was obtained (21.1 mg, 0.082 mmol, 68%)

White solid; mp 93-94 °C; <sup>1</sup>H-NMR (400 MHz, CDCl<sub>3</sub>) δ 7.94 (dt, *J* = 8.9, 2.2 Hz, 2H), 7.44 (dt, *J* = 8.9, 2.2 Hz, 2H), 7.41-7.33 (m, 5H), 4.22 (d, *J* = 1.8 Hz, 1H), 4.05 (d, *J* = 1.8 Hz, 1H) ppm; <sup>13</sup>C-NMR (101 MHz, CDCl<sub>3</sub>) δ 192.1, 140.7, 135.3, 133.8, 129.9, 129.3, 129.3, 128.9, 125.9, 61.2, 59.5 ppm; IR (neat) 1688, 1240, 697 cm<sup>-1</sup>. The enantioselectivity was determined by chiral HPLC analysis (DAICEL Chiralpak AD-H, hexane : 2-isopropanol = 90 : 10, flow rate = 1.0 mL/min, 23 °C, λ = 250 nm) retention time: major isomer 12.92 min, minor isomer 14.49 min, 86% ee, [α]<sub>D</sub><sup>20</sup> = +181.44 (*c* 1.0, CHCl<sub>3</sub>) The configuration of the major enantiomer is (2*S*,3*R*), determined by comparison with literature data<sup>[17]</sup>

**(4-Bromophenyl)[(2*S*,3*R*)-3-phenyloxiran-2-yl]methanone (2d)**

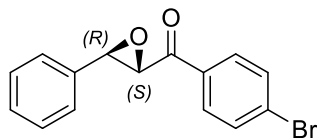

According to the procedure (C), the compound **2d** was obtained (25.1 mg, 0.083 mmol, 69%).

White solid; mp 88-89 °C; <sup>1</sup>H-NMR (400 MHz, CDCl<sub>3</sub>) δ 7.87 (dt, *J* = 9.0, 2.1 Hz, 2H), 7.61 (dt, *J* = 8.6, 2.1 Hz, 2H), 7.41-7.33 (m, 5H), 4.21 (d, *J* = 2.3 Hz, 1H), 4.05 (d, *J* = 1.8 Hz, 1H) ppm; <sup>13</sup>C-NMR (101 MHz, CDCl<sub>3</sub>) δ 192.4, 135.3, 134.2, 132.3, 130.0, 129.5, 129.3, 128.9, 125.9, 61.1, 59.5 ppm; IR (neat) 1688, 1238, 696 cm<sup>-1</sup>. The enantioselectivity was determined by chiral HPLC analysis (DAICEL Chiralpak OD-H, hexane : 2-isopropanol = 90 : 10, flow rate = 0.5 mL/min, 23 °C, λ = 250 nm) retention time: major isomer 25.71 min, minor isomer 26.92 min, 87% ee, [α]<sub>D</sub><sup>20</sup> = +151.11 (*c* 1.0, CHCl<sub>3</sub>) The configuration of the major enantiomer is (2*S*,3*R*), determined by comparison with literature data<sup>[17]</sup>

**(4-Methylphenyl)[(2*S*,3*R*)-3-phenyl-2-oxiranyl]methanone (2e)**

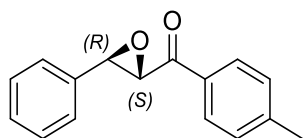

According to the procedure (C), the compound **2e** was obtained (28 mg, 0.118 mmol, 98%).

White solid; mp 61-62 °C; <sup>1</sup>H-NMR (400 MHz, CDCl<sub>3</sub>) δ 7.90 (d, *J* = 8.3 Hz, 2H), 7.41-7.34 (m, 5H), 7.26 (d, *J* = 7.8 Hz, 2H), 4.26 (d, *J* = 1.8 Hz, 1H), 4.05 (d, *J* = 1.8 Hz, 1H), 2.41 (s, 3H) ppm; <sup>13</sup>C-NMR (101 MHz, CDCl<sub>3</sub>) δ 192.5, 145.0, 135.6, 133.0, 129.5, 129.0, 128.7, 128.4,

125.8, 60.9, 59.3, 21.8 ppm; IR (neat) 1686, 1236  $\text{cm}^{-1}$ ; HRMS (FAB)  $m/z$ :  $[\text{M} + \text{H}]^+$  calcd for  $[\text{C}_{16}\text{H}_{15}\text{O}_2]^+$  239.1072; found 239.1059. The enantioselectivity was determined by chiral HPLC analysis (DAICEL Chiralpak AD-H, hexane : 2-isopropanol = 95 : 5, flow rate = 1.0 mL/min, 23 °C,  $\lambda = 250$  nm) retention time: major isomer 19.58 min, minor isomer 21.22 min, 97% ee,  $[\alpha]_{\text{D}}^{20} = +259.7$  ( $c$  0.5,  $\text{CHCl}_3$ ) The configuration of the major enantiomer is (2*S*,3*R*), determined by comparison with literature data<sup>[15]</sup>

**(4-Methoxyphenyl)[(2*S*,3*R*)-3-phenyl-2-oxiranyl]methanone (2f)**

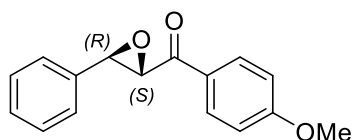

According to the procedure (C), the compound **2f** was obtained (30.2 mg, 0.119 mmol, 99%).

White solid; mp 62-63 °C;  $^1\text{H-NMR}$  (400 MHz,  $\text{CDCl}_3$ )  $\delta$  7.99 (dt,  $J = 9.4, 2.4$  Hz, 2H), 7.39-7.24 (m, 5H), 6.93 (d,  $J = 9.2$  Hz, 2H), 4.24 (d,  $J = 1.8$  Hz, 1H), 4.05 (d,  $J = 1.8$  Hz, 1H), 3.85 (s, 3H) ppm;  $^{13}\text{C-NMR}$  (101 MHz,  $\text{CDCl}_3$ )  $\delta$  191.4, 164.3, 135.8, 130.9, 129.1, 128.8, 128.7, 125.9, 114.2, 61.0, 59.3, 55.7 ppm; IR (neat) 1678, 1240  $\text{cm}^{-1}$ ; HRMS (FAB)  $m/z$ :  $[\text{M} + \text{H}]^+$  calcd for  $[\text{C}_{16}\text{H}_{15}\text{O}_3]^+$  255.1021; found 255.1010. The enantioselectivity was determined by chiral HPLC analysis (DAICEL Chiralpak AD-H, hexane : 2-isopropanol = 90 : 10, flow rate = 1.0 mL/min, 23 °C,  $\lambda = 250$  nm) retention time: major isomer 23.05 min, minor isomer 25.57 min, 99% ee,  $[\alpha]_{\text{D}}^{20} = +197.24$  ( $c$  1.0,  $\text{CHCl}_3$ ) The configuration of the major enantiomer is (2*S*,3*R*), determined by comparison with literature data<sup>[15]</sup>

**(3-Methoxyphenyl)[(2*S*,3*R*)-3-phenyl-2-oxiranyl]methanone (2g)**

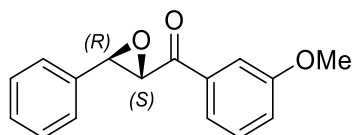

According to the procedure (C), the compound **2g** was obtained (18.9 mg, 0.074 mmol, 62%).

Clear oil;  $^1\text{H-NMR}$  (400 MHz,  $\text{CDCl}_3$ )  $\delta$  7.57-7.55 (m, 1H), 7.51 (t,  $J = 2.1$  Hz, 1H), 7.41-7.34 (m, 6H), 7.16-7.13 (m, 1H), 4.27 (d,  $J = 1.8$  Hz, 1H), 4.05 (d,  $J = 1.8$  Hz, 1H), 3.83 (s, 3H) ppm;  $^{13}\text{C-NMR}$  (101 MHz,  $\text{CDCl}_3$ )  $\delta$  193.0, 160.1, 136.8, 135.5, 130.0, 129.2, 128.9, 125.9, 121.1, 120.7, 112.5, 61.1, 59.6, 55.6 ppm; IR (neat) 1689, 1266  $\text{cm}^{-1}$ ; HRMS (FAB)  $m/z$ :  $[\text{M} + \text{H}]^+$  calcd for  $[\text{C}_{16}\text{H}_{15}\text{O}_3]^+$  255.1021; found 255.1010. The enantioselectivity was determined by chiral HPLC analysis (DAICEL Chiralpak OD-H, hexane : 2-isopropanol = 90 : 10, flow rate = 1.0 mL/min, 23  $^\circ\text{C}$ ,  $\lambda = 250$  nm) retention time: major isomer 12.26 min, minor isomer 13.22 min, 80% ee,  $[\alpha]_{\text{D}}^{20} = +161.06$  ( $c$  1.0,  $\text{CHCl}_3$ ) The configuration of the major enantiomer is (2*S*,3*R*), determined by comparison with literature data<sup>[18],[19]</sup>.

### Furan-2-yl[(2*S*,3*R*)-3-phenyloxiran-2-yl]methanone (**2h**)

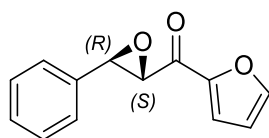

According to the procedure (C), the compound **2h** was obtained (22.1 mg, 0.103 mmol, 86%)

Pale yellow solid; mp 63-64  $^\circ\text{C}$ ;  $^1\text{H-NMR}$  (400 MHz,  $\text{CDCl}_3$ )  $\delta$  7.65 (d,  $J = 0.9$  Hz, 1H), 7.44 (d,  $J = 3.7$  Hz, 1H), 7.39-7.31 (m, 5H), 6.58 (q,  $J = 1.8$  Hz, 1H), 4.13 (d,  $J = 1.8$  Hz, 1H), 4.12 (d,  $J = 1.8$  Hz, 1H) ppm;  $^{13}\text{C-NMR}$  (101 MHz,  $\text{CDCl}_3$ )  $\delta$  182.0, 151.2, 147.6, 135.3, 129.0, 128.7, 125.8, 119.5, 112.6, 60.6, 59.6 ppm; IR (neat) 1674, 1272  $\text{cm}^{-1}$ ; HRMS (FAB)  $m/z$ :  $[\text{M}$



+ H]<sup>+</sup> calcd for [C<sub>13</sub>H<sub>11</sub>O<sub>3</sub>]<sup>+</sup> 215.0708; found 215.0713. The enantioselectivity was determined by chiral HPLC analysis (DAICEL Chiralpak AD-H, hexane : 2-isopropanol = 90 : 10, flow rate = 1.0 mL/min, 23 °C, λ = 250 nm) retention time: major isomer 13.00 min, minor isomer 14.91 min, 77% ee, [α]<sup>20</sup><sub>D</sub> = +170.6 (c 0.5, CHCl<sub>3</sub>) The configuration of the major enantiomer is (2*S*,3*R*), determined by comparison with literature data<sup>[20]</sup>.

### [(2*S*,3*R*)-3-Phenyl-2-oxiranyl]-2-thienylmethanone (**2i**)

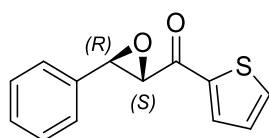

According to the procedure (C), the compound **2i** was obtained (27.3 mg, 0.119 mmol, 99%).

White solid; mp 60-61 °C; <sup>1</sup>H-NMR (400 MHz, CDCl<sub>3</sub>) δ 7.98 (dd, *J* = 3.9, 1.1 Hz, 1H), 7.72 (dd, *J* = 4.8, 1.1 Hz, 1H), 7.40-7.31 (m, 5H), 7.16 (dd, *J* = 4.8, 3.9 Hz, 1H), 4.15 (d, *J* = 1.8 Hz, 1H), 4.06 (d, *J* = 1.8 Hz, 1H) ppm; <sup>13</sup>C-NMR (101 MHz, CDCl<sub>3</sub>) δ 186.4, 140.9, 135.2, 133.6, 129.0, 128.7, 128.4, 125.7, 62.0, 59.4 ppm; IR (neat) 1664, 1243, 754 cm<sup>-1</sup>; HRMS (FAB) *m/z*: [M + H]<sup>+</sup> calcd for [C<sub>13</sub>H<sub>11</sub>O<sub>2</sub>S]<sup>+</sup> 231.048; found 231.0476. The enantioselectivity was determined by chiral HPLC analysis (DAICEL Chiralpak OD-H, hexane : 2-isopropanol = 90 : 10, flow rate = 1.0 mL/min, 23 °C, λ = 250 nm) retention time: minor isomer 12.62 min, major isomer 14.00 min, 99% ee, [α]<sup>20</sup><sub>D</sub> = +313.64 (c 1.0, CH<sub>2</sub>Cl<sub>2</sub>) The configuration of the major enantiomer is (2*S*,3*R*), determined by comparison with literature data<sup>[21]</sup>.

### 2-Naphthalenyl[(2*S*,3*R*)-3-phenyl-2-oxiranyl]methanone (**2j**)

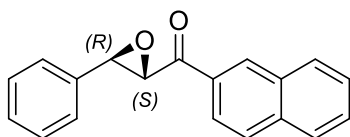

According to the procedure (C), the compound **2j** was obtained (32.6 mg, 0.119 mmol, 99%).

White solid; mp 111-112 °C; <sup>1</sup>H-NMR (400 MHz, CDCl<sub>3</sub>) δ 8.54 (s, 1H), 8.04 (dd, *J* = 8.7, 1.4 Hz, 1H), 7.92 (t, *J* = 9.6 Hz, 2H), 7.87 (d, *J* = 8.3 Hz, 1H), 7.61 (t, *J* = 7.1 Hz, 1H), 7.54 (t, *J* = 7.3 Hz, 1H), 7.41 (t, *J* = 13.3 Hz, 6H), 4.43 (d, *J* = 1.4 Hz, 1H), 4.14 (d, *J* = 1.4 Hz, 1H) ppm; <sup>13</sup>C-NMR (101 MHz, CDCl<sub>3</sub>) δ 192.7, 135.7, 135.4, 132.6, 132.2, 130.3, 129.5, 128.9, 128.7, 128.6, 127.7, 126.9, 125.7, 123.5, 60.9, 59.3 ppm; IR (neat) 1682, 1179, 752 cm<sup>-1</sup>; HRMS (FAB) *m/z*: [M + H]<sup>+</sup> calcd for [C<sub>19</sub>H<sub>15</sub>O<sub>2</sub>]<sup>+</sup> 275.1072; found 275.1057. The enantioselectivity was determined by chiral HPLC analysis (DAICEL Chiralpak AD-H, hexane : 2-isopropanol = 90 : 10, flow rate = 1.0 mL/min, 23 °C, λ = 250 nm) retention time: major isomer 15.55 min, minor isomer 18.09 min, 99% ee, [α]<sub>D</sub><sup>20</sup> = +133.5 (*c* 0.5, CHCl<sub>3</sub>) The configuration of the major enantiomer is (2*S*,3*R*), determined by comparison with literature data<sup>[16]</sup>.

### [(2*S*,3*R*)-3-(4-Fluorophenyl)-2-oxiranyl]phenylmethanone (**2l**)

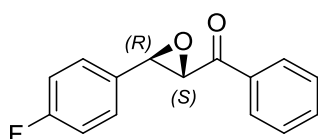

According to the procedure (C), the compound **2l** was obtained (27.4 mg, 0.113 mmol, 94%).  
 White solid; mp 79-80 °C; <sup>1</sup>H-NMR (400 MHz, CDCl<sub>3</sub>) δ 8.00-7.98 (m, 2H), 7.63-7.59 (m, 1H), 7.48 (t, *J* = 7.6 Hz, 2H), 7.33 (dd, *J* = 8.7, 5.1 Hz, 2H), 7.08 (t, *J* = 8.5 Hz, 2H), 4.24 (d, *J* = 1.8 Hz, 1H), 4.05 (d, *J* = 1.8 Hz, 1H) ppm; <sup>13</sup>C-NMR (101 MHz, CDCl<sub>3</sub>) δ 192.9, 164.4, 161.9, 135.4, 134.1, 131.2, 131.2, 128.9, 128.3, 127.6, 127.5, 116.0, 115.7, 60.9, 58.8 ppm; IR (neat) 1688, 1231, 754 cm<sup>-1</sup>; HRMS (FAB) *m/z*: [M + H]<sup>+</sup> calcd for [C<sub>15</sub>H<sub>12</sub>FO<sub>2</sub>]<sup>+</sup> 243.0821;

found 243.0815 ; The enantioselectivity was determined by chiral HPLC analysis (DAICEL Chiralpak AD-H, hexane : 2-isopropanol = 90 : 10, flow rate = 1.0 mL/min, 23 °C,  $\lambda$  = 250 nm) retention time: major isomer 12.09 min, minor isomer 12.97 min, 72% ee,  $[\alpha]_D^{20} = +271.29$  ( $c$  1.0, CH<sub>2</sub>Cl<sub>2</sub>) The configuration of the major enantiomer is (2*S*,3*R*), determined by comparison with literature data<sup>[15]</sup>.

**[(2*S*,3*R*)-3-(3-Fluorophenyl)-2-oxiranyl]phenylmethanone (2*m*)**

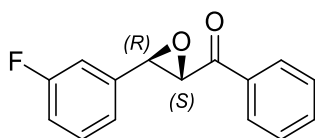

According to the procedure (C), the compound **2m** was obtained (24.7 mg, 0.102 mmol, 85%).

White solid; mp 75-76 °C; <sup>1</sup>H-NMR (400 MHz, CDCl<sub>3</sub>)  $\delta$  7.99 (dt,  $J$  = 8.3, 1.6 Hz, 2H), 7.61 (tt,  $J$  = 7.4, 1.5 Hz, 1H), 7.51-7.46 (m, 2H), 7.38-7.33 (m, 1H), 7.16 (dt,  $J$  = 7.7, 1.1 Hz, 1H), 7.08-7.03 (m, 2H), 4.24 (d,  $J$  = 1.8 Hz, 1H), 4.06 (d,  $J$  = 1.4 Hz, 1H) ppm; <sup>13</sup>C-NMR (101 MHz, CDCl<sub>3</sub>)  $\delta$  192.6, 164.3, 161.9, 138.2, 138.1, 135.3, 134.1, 130.5, 130.4, 128.9, 128.4, 121.7, 121.6, 116.2, 115.9, 112.6, 112.4, 77.3, 60.8, 58.6, 58.6 ppm; IR (neat) 1689, 1233, 747 cm<sup>-1</sup>; HRMS (FAB)  $m/z$ : [M + H]<sup>+</sup> calcd for [C<sub>15</sub>H<sub>12</sub>FO<sub>2</sub>]<sup>+</sup> 243.0821; found 243.0827. The enantioselectivity was determined by chiral HPLC analysis (DAICEL Chiralpak AD-H, hexane : 2-isopropanol = 95 : 5, flow rate = 1.0 mL/min, 23 °C,  $\lambda$  = 250 nm) retention time: minor isomer 14.38 min, major isomer 16.82 min, 96% ee,  $[\alpha]_D^{20} = +282.05$  ( $c$  1.0, CH<sub>2</sub>Cl<sub>2</sub>). The configuration of the major enantiomer is (2*S*,3*R*), determined by comparison with literature data<sup>[2],[21]</sup>.

**[(2*S*,3*R*)-3-(2-Fluorophenyl)-2-oxiranyl]phenylmethanone (2n)**

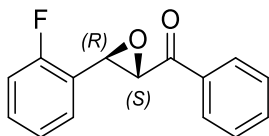

According to the procedure (C), the compound **2n** was obtained (28.8 mg, 0.119 mmol, 99%)  
White solid; mp 77-78 °C; <sup>1</sup>H-NMR (400 MHz, CDCl<sub>3</sub>) δ 8.02-8.00 (m, 2H), 7.61 (t, *J* = 7.3 Hz, 1H), 7.49 (t, *J* = 7.8 Hz, 2H), 7.36-7.31 (m, 2H), 7.18 (t, *J* = 7.6 Hz, 1H), 7.11-7.06 (m, 1H), 4.33 (d, *J* = 1.8 Hz, 1H), 4.28 (d, *J* = 1.8 Hz, 1H) ppm; <sup>13</sup>C-NMR (101 MHz, CDCl<sub>3</sub>) δ 193.0, 162.9, 160.4, 135.5, 134.2, 130.5, 130.4, 129.0, 128.5, 126.5, 126.5, 124.7, 124.7, 123.1, 123.0, 115.7, 115.5, 60.1, 54.3, 54.2 ppm; IR (neat) 1689, 1233, 758 cm<sup>-1</sup>; HRMS (FAB) *m/z*: [M + H]<sup>+</sup> calcd for [C<sub>15</sub>H<sub>12</sub>FO<sub>2</sub>]<sup>+</sup> 243.0821; found 243.0815; The enantioselectivity was determined by chiral HPLC analysis (DAICEL Chiralcel AS-H, hexane : ethanol = 90 : 10, flow rate = 1.0 mL/min, 23 °C, λ = 250 nm) retention time: major isomer 9.27 min, minor isomer 18.11 min, 99% ee; [α]<sub>D</sub><sup>20</sup> = +155.6 (*c* 1.0, CHCl<sub>3</sub>) The configuration of the major enantiomer is (2*S*,3*R*), determined by comparison with literature data<sup>[2],[23]</sup>.

**[(2*S*,3*R*)-3-(2-Chlorophenyl)-2-oxiranyl]phenylmethanone (2o)**

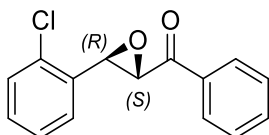

According to the procedure (C), the compound **2o** was obtained(24.3 mg, 0.094 mmol, 78%).  
White solid; mp 81-82 °C; <sup>1</sup>H-NMR (400 MHz, CDCl<sub>3</sub>) δ 8.05-8.02 (m, 2H), 7. 63-7.59 (m, 1H), 7.51-7.47 (m, 2H), 7.39 (td, *J* = 4.6, 2.1 Hz, 2H), 7.33-7.29 (m, 2H), 4.39 (d, *J* = 1.8 Hz, 1H), 4.15 (d, *J* = 1.8 Hz, 1H); <sup>13</sup>C-NMR (101 MHz, CDCl<sub>3</sub>) δ 192.86, 135.44, 134.17, 133.87,

133.40, 129.86, 129.43, 128.98, 128.50, 127.36, 126.22, 60.14, 57.26; IR (neat) 1690, 1230, 754; HRMS (FAB)  $m/z$ :  $[M + H]^+$  calcd for  $[C_{15}H_{12}ClO_2]^+$  259.0526; found 259.0536.; The enantioselectivity was determined by chiral HPLC analysis (DAICEL Chiralcel AD-H, hexane : 2-isopropanol = 99 : 1, flow rate = 1.0 mL/min, 23 °C,  $\lambda$  = 254 nm) retention time: minor isomer 19.46 min, major isomer 21.79 min, 98% ee;  $[\alpha]_D^{20} = -15.04$  ( $c$  1.0,  $CHCl_3$ ) The configuration of the major enantiomer is (2*S*,3*R*), determined by comparison with literature data<sup>[24]</sup>.

**[(2*S*,3*R*)-3-(2-Bromophenyl)-2-oxiranyl]phenylmethanone (2p)**

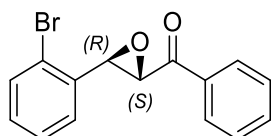

According to the procedure (C), the compound **2p** was obtained (8.5 mg, 0.029 mmol, 23%).

White solid; mp 76-77 °C;  $^1H$ -NMR (400 MHz,  $CDCl_3$ )  $\delta$  8.06-8.04 (m, 2H), 7.64-7.60 (m, 1H), 7.57-7.55 (m, 1H), 7.51-7.47 (m, 2H), 7.39-7.34 (m, 2H), 7.25-7.22 (m, 1H), 4.33 (d,  $J$  = 2.3 Hz, 1H), 4.14 (d,  $J$  = 1.8 Hz, 1H);  $^{13}C$ -NMR (101 MHz,  $CDCl_3$ )  $\delta$  192.84, 135.53, 135.43, 134.16, 132.56, 130.15, 128.95, 128.55, 127.92, 126.56, 122.62, 60.09, 59.45; IR(KBr) 1689, 1229, 753; The enantioselectivity was determined by chiral HPLC analysis (DAICEL Chiralcel AD-H, hexane : 2-isopropanol = 99 : 1, flow rate = 1.0 mL/min, 23 °C,  $\lambda$  = 254 nm) retention time: minor isomer 33.79 min, major isomer 37.50 min, 54% ee;  $[\alpha]_D^{20} = -19.91$  ( $c$  1.0,  $CHCl_3$ ) The configuration of the major enantiomer is (2*S*,3*R*), determined by comparison with literature data<sup>[24]</sup>.

**[(2*S*,3*R*)-3-(4-Methylphenyl)-2-oxiranyl]phenylmethanone (2q)**

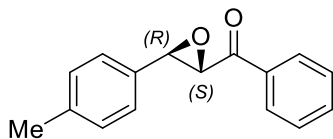

According to the procedure (C), the compound **2q** was obtained (6.3 mg, 0.026 mmol, 22%)

White solid; mp 78-79 °C; <sup>1</sup>H-NMR (400 MHz, CDCl<sub>3</sub>) δ 7.99 (d, *J* = 7.3 Hz, 2H), 7.60 (t, *J* = 7.6 Hz, 1H), 7.47 (t, *J* = 7.6 Hz, 2H), 7.25 (d, *J* = 8.6 Hz, 2H), 7.20 (d, *J* = 8.6 Hz, 2H), 4.28 (d, *J* = 1.8 Hz, 1H), 4.02 (d, *J* = 1.8 Hz, 1H), 2.36 (s, 3H) ppm; <sup>13</sup>C-NMR (101 MHz, CDCl<sub>3</sub>) δ 193.3, 139.2, 135.6, 134.1, 132.5, 129.6, 129.0, 128.4, 125.9, 61.2, 59.6, 21.4 ppm; IR (neat) 1688, 1232, 753 cm<sup>-1</sup>; HRMS (FAB) *m/z*: [M + H]<sup>+</sup> calcd for [C<sub>16</sub>H<sub>15</sub>O<sub>2</sub>]<sup>+</sup> 239.1072; found 239.1079. The enantioselectivity was determined by chiral HPLC analysis (DAICEL Chiralpak OD-H, hexane : 2-isopropanol = 90 : 10, flow rate = 1.0 mL/min, 23 °C, λ = 250 nm) retention time: major isomer 8.73 min, minor isomer 9.48 min, 17% ee, [α]<sub>D</sub><sup>20</sup> = +51.95 (*c* 1.0, CHCl<sub>3</sub>) The configuration of the major enantiomer is (2*S*,3*R*), determined by comparison with literature data<sup>[25]</sup>.

**[(2*S*,3*R*)-3-(3-Methylphenyl)-2-oxiranyl]phenylmethanone (2r)**

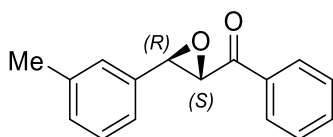

According to the procedure (C), the compound **2r** was obtained (14 mg, 0.059 mmol, 49%).

White solid; mp 50-51 °C; <sup>1</sup>H-NMR (400 MHz, CDCl<sub>3</sub>) δ 7.99 (d, *J* = 7.3 Hz, 2H), 7.60 (t, *J* = 7.6 Hz, 1H), 7.47 (t, *J* = 7.6 Hz, 2H), 7.28 (t, *J* = 7.6 Hz, 1H), 7.19-7.17 (m, 3H), 4.28 (d, *J* =

1.2 Hz, 1H), 4.03 (d,  $J = 1.2$  Hz, 1H), 2.36 (s, 3H) ppm;  $^{13}\text{C}$ -NMR (101 MHz,  $\text{CDCl}_3$ )  $\delta$  193.2, 138.7, 135.6, 135.5, 134.1, 130.0, 129.0, 128.8, 128.5, 126.4, 123.1, 61.1, 59.6, 21.5 ppm; IR (neat) 1689, 1232, 775  $\text{cm}^{-1}$ ; HRMS (FAB)  $m/z$ :  $[\text{M} + \text{H}]^+$  calcd for  $[\text{C}_{16}\text{H}_{15}\text{O}_2]^+$  239.1072; found 239.1076. The enantioselectivity was determined by chiral HPLC analysis (DAICEL Chiralpak OD-H, hexane : 2-isopropanol = 90 : 10, flow rate = 0.5 mL/min, 23 °C,  $\lambda = 250$  nm) retention time: major isomer 18.74 min, minor isomer 19.57 min, 79% ee,  $[\alpha]_{\text{D}}^{20} = +196.16$  ( $c$  1.0,  $\text{CHCl}_3$ ) The configuration of the major enantiomer is (2*S*,3*R*), determined by comparison with literature data<sup>[25]</sup>.

#### [(2*S*,3*R*)-3-(2-Methylphenyl)-2-oxiranyl]phenylmethanone (2s)

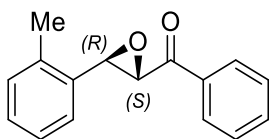

According to the procedure (C), the compound **2s** was obtained (20.5 mg, 0.086 mmol, 72%).

Clear oil; mp 50.6 °C;  $^1\text{H}$ -NMR (400 MHz,  $\text{CDCl}_3$ )  $\delta$  8.13-8.10 (m, 2H), 7.72-7.68 (m, 1H), 7.59-7.55 (m, 2H), 7.42-7.39 (m, 1H), 7.34-7.31 (m, 2H), 7.27-7.25 (m, 1H), 4.29-4.27 (m, 2H), 2.43 (s, 3H);  $^{13}\text{C}$ -NMR (101 MHz,  $\text{CDCl}_3$ )  $\delta$  193.49, 136.50, 135.60, 134.24, 134.08, 130.31, 129.10, 128.67, 128.50, 126.56, 124.38, 60.24, 57.92, 19.01; IR (neat) 1689, 1231, 752; HRMS (FAB)  $m/z$ :  $[\text{M} + \text{H}]^+$  calcd for  $[\text{C}_{16}\text{H}_{15}\text{O}_2]^+$  239.1072; found 239.1089.; The enantioselectivity was determined by chiral HPLC analysis (DAICEL Chiralcel OJ-H, hexane : 2-isopropanol = 90 : 10, flow rate = 1.0 mL/min, 23 °C,  $\lambda = 254$  nm) retention time: major isomer 11.56 min, minor isomer 14.37 min, 93% ee;  $[\alpha]_{\text{D}}^{20} = +55.37$  ( $c$  1.0,  $\text{CHCl}_3$ ) The configuration of the major enantiomer is (2*S*,3*R*), determined by comparison with literature data<sup>[23]</sup>.

**[(2*S*,3*R*)-3-(2-Nitrophenyl)-2-oxiranyl]phenylmethanone (2t)**

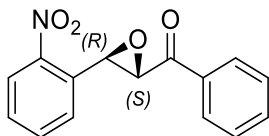

According to the procedure (C), the compound **2t** was obtained (18.8 mg, 0.070 mmol, 58%).

White solid; mp 125-126 °C; <sup>1</sup>H-NMR (400 MHz, CDCl<sub>3</sub>) δ 8.20 (d, *J* = 8.3 Hz, 1H), 8.01-7.99 (m, 2H), 7.73 (d, *J* = 4.1 Hz, 2H), 7.61 (t, *J* = 7.6 Hz, 1H), 7.57-7.53 (m, 1H), 7.49-7.45 (m, 2H), 4.62 (d, *J* = 1.8 Hz, 1H), 4.21 (d, *J* = 1.8 Hz, 1H); <sup>13</sup>C-NMR (101 MHz, CDCl<sub>3</sub>) δ 192.6, 147.6, 135.4, 134.7, 134.2, 132.7, 129.5, 128.9, 128.6, 127.5, 125.0, 59.7, 57.8; IR (neat) 1689, 1524, 1345, 1231; HRMS (FAB) *m/z*: [M + H]<sup>+</sup> calcd for [C<sub>15</sub>H<sub>12</sub>NO<sub>4</sub>]<sup>+</sup> 270.0766; found 270.0773.; The enantioselectivity was determined by chiral HPLC analysis (DAICEL Chiralcel OD-H, hexane : 2-isopropanol = 90 : 10, flow rate = 1.0 mL/min, 23 °C, λ = 254 nm) retention time: minor isomer 20.34 min, major isomer 22.47 min, 86% ee; [α]<sub>D</sub><sup>20</sup> = +124.37 (*c* 1.0, CHCl<sub>3</sub>)  
The configuration of the major enantiomer is (2*S*,3*R*), determined by comparison with literature data<sup>[26]</sup>.

**(*E*)-3-(furan-2-yl)-1-phenylprop-2-en-1-one<sup>[28]</sup> (1v)**

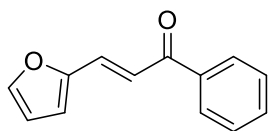

To a solution of furfural (0.21 mL, 2.50 mmol) and acetophenone (0.29 mL, 2.50 mmol) dissolved in ethanol (12.5 mL) was added NaOH (200 mg, 5.0 mmol). The mixture was stirred for at room temperature until starting material had been consumed. To the reaction mixture,



citric acid solution (10 % aq., 20 mL) was added. The suspension was diluted with dichloromethane (20 mL) and washed with brine (2 x 20 mL), dried over MgSO<sub>4</sub>, filtered and concentrated *in vacuo*. The residue was purified by flash column chromatography on silica gel (hexane : EtOAc = 50 : 1) to afford the desired product (236.6 mg, 0.916 mmol, 37%) as a yellow oil.

<sup>1</sup>H-NMR (400 MHz, CDCl<sub>3</sub>) δ 8.00-8.02 (m, 2H), 7.53-7.60 (m, 2H), 7.42-7.51 (m, 4H), 6.70 (d, *J* = 3.2 Hz, 1H), 6.49 (q, *J* = 1.7 Hz, 1H); <sup>13</sup>C-NMR (101 MHz, CDCl<sub>3</sub>) δ 189.91, 151.76, 145.03, 138.23, 132.86, 130.76, 128.70, 128.52, 119.39, 116.35, 112.78

**(2*E*,4*E*)-1,5-diphenylpenta-2,4-dien-1-one**<sup>[29]</sup> (**1w**)

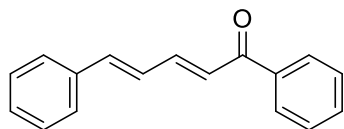

To a solution of cinnamaldehyde (0.104 mL, 0.832 mmol) and acetophenone (100mg, 0.832 mmol) dissolved in ethanol (1.7 mL) was added NaOH (67 mg, 1.665 mmol). The mixture was stirred for at room temperature until starting material had been consumed. To the reaction mixture, citric acid solution (10 % aq., 2 mL) was added. The suspension was diluted with dichloromethane (10 mL) and washed with brine (2 x 10 mL), dried over MgSO<sub>4</sub>, filtered and concentrated *in vacuo*. The residue was purified by flash column chromatography on silica gel (hexane : EtOAc = 50 : 1) to afford the desired product (182.1 mg, 0.777 mmol, 93%) as a yellow solid.

<sup>1</sup>H-NMR (400 MHz, CDCl<sub>3</sub>) δ 7.97-7.95 (m, 2H), 7.62-7.54 (m, 2H), 7.50-7.46 (m, 4H), 7.34 (td, *J* = 14.3, 7.0 Hz, 3H), 7.08 (d, *J* = 14.6 Hz, 1H), 7.02 (d, *J* = 3.2 Hz, 1H), 7.01 (s, 1H); <sup>13</sup>C-

NMR (101 MHz, CDCl<sub>3</sub>)  $\delta$  190.7, 145.0, 142.1, 138.3, 136.2, 132.8, 129.3, 129.0, 128.7, 128.5, 127.4, 127.0, 125.5

**(E)-1-cyclohexyl-3-phenylprop-2-en-1-one**<sup>[30]</sup> (**1x**)

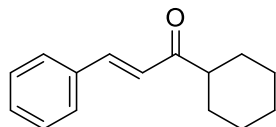

To a solution of benzaldehyde (0.24 mL, 2.38 mmol) and cyclohexyl methyl ketone (0.33 mL, 2.38 mmol) dissolved in ethanol (11.9 mL) was added NaOH (190.2 mg, 4.75 mmol). The mixture was stirred for at room temperature until starting material had been consumed. To the reaction mixture, citric acid solution (10 % aq., 20 mL) was added. The suspension was diluted with dichloromethane (10 mL) and washed with brine (2 x 20 mL), dried over MgSO<sub>4</sub>, filtered and concentrated *in vacuo*. The residue was purified by flash column chromatography on silica gel (hexane : EtOAc = 50 : 1) to afford the desired product (471.9 mg, 2.20 mmol) as a clear oil.

<sup>1</sup>H-NMR (400 MHz, CDCl<sub>3</sub>)  $\delta$  7.59-7.53 (m, 3H), 7.37-7.35 (m, 3H), 6.80 (d, *J* = 16.0 Hz, 1H), 2.64 (tt, *J* = 11.1, 3.4 Hz, 1H), 1.90-1.80 (m, 4H), 1.71-1.68 (m, 1H), 1.46-1.18 (m, 5H); <sup>13</sup>C-NMR (101 MHz, CDCl<sub>3</sub>)  $\delta$  203.2, 142.3, 134.8, 130.4, 129.0, 128.4, 124.8, 49.5, 28.8, 26.0, 25.9

**1 g Scale epoxidation of chalcone**

To a mixture of chalcone **1a** (1.0 g, 4.8 mmol), chiral catalyst **13** (44.7 mg, 0.048 mmol), *N*-*tert*-Butyl- $\alpha$ -phenylnitron (85.1 mg, 0.48 mmol) and Span 20 (1% *i*Pr<sub>2</sub>O solution, 0.17 mL, 0.0096 mmol) in isopropyl ether (16 mL) was added 30% aqueous hydrogen peroxide (4.9 mL,

48 mmol) and 50% aqueous KOH (0.54 mL, 4.8 mmol) was added, and the reaction mixture was stirred vigorously at room temperature until starting material had been consumed. The suspension was diluted with ether (100 mL), washed with water (2 x 50 mL), dried over MgSO<sub>4</sub>, filtered and concentrated *in vacuo*. Purification of residue by flash column chromatography on silica gel (hexanes : EtOAc = 50 : 1) afforded the desired product **2a** (1.07 g, >99% yield) as a white solid. The enantioselectivity was determined by chiral HPLC analysis (DAICEL Chiralpak AD, hexanes : ethanol = 90 : 10, flow rate = 1.0 mL/min, 23 °C,  $\lambda$  = 254 nm, retention times; 18.16 min(minor), 27.24 min(major), >99% ee). The absolute configuration was determined by comparison of the HPLC retention time with the reported data.

## Computational Method

**[MD Simulations for transition state]** The initial geometry of catalyst **13** was build based on the X-ray crystallography. The substrate and peroxide anion were built by the LigPrep of Schrodinger Suite 2018-2. After preparing the complex consisting of substrate, peroxide anion, and catalyst **13**, molecular dynamics (MD) simulations of the complex were carried out using Macromodel v12.0 of of Schrodinger Suite 2018-2. OPLS3e force field parameters were used to describe molecules (No. of parameters, stretch: 151, bend: 268, torsion parameters: 426). Dielectric constant was 1.0, the Lennard–Jones (LJ) interactions were truncated at 12 Å, and van der waals interactions were truncated at 7 Å. Step wisely, conformational search, energy calculation, energy minimization of selected frame, and molecular dynamics were conducted. Atoms of catalyst **13** were frozen, and free movement of substrate and peroxide anion was allowed during MD simulation. For MD simulations, a temperature of 383 K was maintained under constant temperature velocity-Verlet algorithm, and time step of 1.5 fs, equilibration time of 1.0 ps, and simulation time of 10 ps with the SHAKE algorithm to constrain all covalent bonds containing hydrogen atoms. Two organic solvents, water and chloroform, were used for the MD simulations of the complex.

**[DFT Calculations for transition state]** After getting the optimized conformational complex resulting from MD simulations, density functional theory (DFT) calculations were carried out using the the Jaguar-v10.7 of Schrodinger Suite 2020-1 with density-functional theory. All the geometries of each species were optimized to respective minimum energy geometries using the functional  $\omega$ B97X-D method with basis set 6-31++G(d,p). At the same computational level, frequency calculations were performed to see if the geometry optimization had found a minimum. After 65 iterative geometry optimizations, all criteria of convergence were satisfied

including the change of total energy, gradient maximum of the energy, gradient root mean square between geometries, and so on.

### Cartesian coordinates of the optimized structure

SCF E(wB97XD) = -3285.724 a.u.

|     |               |               |               |
|-----|---------------|---------------|---------------|
| C1  | -2.4188775944 | 1.1863791111  | -3.2962911    |
| C2  | -1.1099509354 | 0.8519182617  | -3.6413409    |
| C3  | -0.4960967446 | -0.3322410781 | -3.2375508    |
| C4  | -1.2496947752 | -1.1837964847 | -2.4215505    |
| C5  | -2.5631456714 | -0.9006673208 | -2.0918015    |
| C6  | -3.1436471692 | 0.2708829252  | -2.5321845    |
| C7  | -4.3983235802 | 3.3462052728  | 0.8108423177  |
| C8  | -3.1152711941 | 2.4278671937  | -3.7730366    |
| C9  | 0.9551968522  | -0.6756051936 | -3.4643362    |
| F10 | -0.4178861670 | 1.7273456193  | -4.3998214    |
| C11 | 1.0130768293  | -5.5101303656 | -3.8149002    |
| H12 | -0.7740160923 | -2.0699851001 | -2.0084590    |
| H13 | -3.1226711444 | -1.5835115093 | -1.4632153    |
| H14 | -4.1759676513 | 0.4833715628  | -2.2670664    |
| N15 | -3.0741537526 | 3.6671426422  | -2.8558487    |
| H16 | -5.0730902947 | 3.3702394309  | 1.6588904323  |
| N17 | 1.2512350000  | -1.6592094558 | -4.5930179    |
| H18 | -4.4388185319 | 2.4435751523  | 0.2068769058  |
| C19 | -4.4802370510 | 4.2221142711  | -2.5189777    |
| C20 | -4.3170092502 | 5.6338556680  | -1.9318876200 |
| C21 | -2.9053641508 | 5.7839760239  | -1.3747959161 |
| C22 | -2.5775675949 | 4.5297575012  | -0.5447074381 |
| C23 | -2.4320038911 | 3.3501271010  | -1.5157972044 |
| C24 | -2.2349127526 | 4.7323287146  | -3.5318107186 |
| C25 | -1.9208302402 | 5.8621480539  | -2.5433725990 |
| C26 | 1.3391026880  | -0.9227760624 | -5.9082441097 |
| C27 | 1.3782912273  | -1.9156489315 | -7.0782812154 |

|     |               |               |               |
|-----|---------------|---------------|---------------|
| C28 | 1.7613012476  | -3.2924968476 | -6.5308765885 |
| C29 | 0.5799980650  | -3.8241733657 | -5.6920235608 |
| C30 | 0.1775936009  | -2.7186553237 | -4.6986738716 |
| C31 | 2.5528811797  | -2.4436772204 | -4.3193790134 |
| C32 | 2.9796541015  | -3.1239587256 | -5.6259668756 |
| H33 | -4.1606151014 | 2.1698790287  | -3.8921856305 |
| H34 | -2.7442805939 | 2.7555538769  | -4.7428635007 |
| H35 | 1.2847325803  | -1.1834619346 | -2.5213334443 |
| H36 | 1.5675268498  | 0.2011064022  | -3.6648359487 |
| H37 | 1.2473316760  | -6.5355724769 | -3.5494873790 |
| C38 | -3.5705794937 | 4.3565801808  | 0.5760837326  |
| H39 | 0.9120103807  | -4.8123223641 | -2.9860989516 |
| H40 | -4.8192122520 | 3.5444226269  | -1.7392299235 |
| C41 | -5.5532774246 | 4.1949341073  | -3.6159264446 |
| H42 | -5.0668257053 | 5.7555058908  | -1.1489522184 |
| H43 | -4.5092341548 | 6.3849432563  | -2.7001600951 |
| H44 | -2.8320512774 | 6.6794735455  | -0.7543067368 |
| H45 | -1.5902394903 | 4.6818855131  | -0.0969103981 |
| H46 | -2.8885244579 | 2.4410423773  | -1.1356982383 |
| H47 | -1.3788956984 | 3.1354822565  | -1.7002153963 |
| H48 | -2.8200626657 | 5.0732892420  | -4.3870137501 |
| H49 | -1.3315435506 | 4.2318851227  | -3.8822949819 |
| H50 | -2.0084422867 | 6.8213144984  | -3.0576219776 |
| C51 | 0.8803885616  | -5.1753583357 | -5.0928524707 |
| H52 | -0.8942429284 | 5.7751424631  | -2.1787309779 |
| H53 | 2.2428195602  | -0.3186799272 | -5.8424845755 |
| H54 | 0.4750375485  | -0.2581560938 | -5.9486338248 |
| H55 | 2.1132387533  | -1.5778262581 | -7.8121377270 |
| H56 | 0.4106576800  | -1.9636179466 | -7.5861852811 |
| H57 | 1.9815810720  | -3.9823642065 | -7.3487566431 |
| H58 | -0.2628305984 | -3.9647686821 | -6.3790572953 |
| H59 | 0.0223230354  | -3.1017894417 | -3.6920700332 |
| H60 | -0.7282277046 | -2.2063564849 | -5.0221326944 |
| H61 | 2.2364926192  | -3.1931256934 | -3.5967756034 |
| C62 | 3.6754412273  | -1.6687832990 | -3.6255695504 |

|     |                |               |               |
|-----|----------------|---------------|---------------|
| H63 | 3.4197466269   | -4.0891402891 | -5.3719711304 |
| H64 | 3.7513779378   | -2.5349198534 | -6.1303115929 |
| H65 | -3.5942929253  | 5.2060818049  | 1.2582942135  |
| H66 | -5.5507736917  | 3.2351390804  | -4.1416233129 |
| O67 | -5.2735395084  | 5.2280579097  | -4.5312158044 |
| C68 | -6.9135976174  | 4.3096149561  | -2.9338011461 |
| H69 | 1.0141938633   | -5.9503667702 | -5.8474061713 |
| C70 | 4.8743693556   | -2.6002905640 | -3.4662901158 |
| H71 | 3.3203243129   | -1.3835663672 | -2.6311564754 |
| O72 | 3.9800286904   | -0.5196251085 | -4.3919837899 |
| H73 | -5.9266258721  | 5.2031898252  | -5.2368323550 |
| H74 | 4.5594749209   | 0.0326684796  | -3.8522629225 |
| C75 | -7.6454128256  | 5.4623328792  | -2.9751698618 |
| C76 | -8.8953119400  | 5.5272434966  | -2.3086392062 |
| N77 | -9.4105914038  | 4.5407364075  | -1.6251878049 |
| C78 | -8.7017565628  | 3.3820542407  | -1.5651566333 |
| C79 | -7.4480787200  | 3.1995134409  | -2.2082981457 |
| C80 | 5.9922998572   | -2.4554013667 | -4.2390466777 |
| C81 | 7.0633564249   | -3.3750056763 | -4.1115783419 |
| N82 | 7.0614660931   | -4.4016525022 | -3.3031893510 |
| C83 | 5.9619792788   | -4.5646464258 | -2.5163398112 |
| C84 | 4.8485279259   | -3.6806992294 | -2.5333498943 |
| H85 | -7.2719138590  | 6.3328559889  | -3.5044391247 |
| H86 | -9.4735235530  | 6.4475669731  | -2.3505981204 |
| C87 | -9.2452203543  | 2.3074964577  | -0.8253382588 |
| C88 | -6.8023657973  | 1.9499143965  | -2.0910993514 |
| H89 | 6.0592681483   | -1.6465095149 | -4.9581520679 |
| H90 | 7.9502488794   | -3.2461788477 | -4.7295505107 |
| C91 | 5.9324608005   | -5.6619377679 | -1.6293273395 |
| C92 | 3.7803090973   | -3.8878984138 | -1.6392388707 |
| C93 | -8.5968041583  | 1.1081431815  | -0.7111992768 |
| C94 | -7.3516333708  | 0.9242119377  | -1.3569444887 |
| C95 | 4.8678522113   | -5.8784244399 | -0.7946732246 |
| C96 | 3.7827408632   | -4.9748642658 | -0.8012959530 |
| H97 | -10.2039257001 | 2.4705881281  | -0.3458146218 |

|      |               |               |               |
|------|---------------|---------------|---------------|
| H98  | -5.8672706069 | 1.7443385898  | -2.5934527821 |
| H99  | 6.7860914838  | -6.3307602711 | -1.6300254073 |
| H100 | 2.9745197841  | -3.1574249829 | -1.5325813135 |
| H101 | -9.0463972731 | 0.3102558569  | -0.1332857107 |
| O102 | -6.6334999307 | -0.2192531170 | -1.3069992583 |
| H103 | 4.8786510183  | -6.7349320446 | -0.1308548659 |
| O104 | 2.6899442543  | -5.1045983303 | 0.0048286131  |
| H105 | 1.7292005339  | -6.0410772881 | 1.5014374675  |
| C106 | 2.6625768781  | -6.1549284749 | 0.9504735916  |
| C107 | -7.1718007998 | -1.3346679981 | -0.6177863762 |
| H108 | 3.5023583928  | -6.0856552901 | 1.6512236697  |
| H109 | 2.6747548555  | -7.1377634839 | 0.4645910129  |
| H110 | -8.1261506781 | -1.6493244857 | -1.0534810530 |
| H111 | -7.3059269812 | -1.1202294852 | 0.4480490930  |
| H112 | -6.4441801267 | -2.1369193519 | -0.7331252478 |
| C113 | -0.2513607910 | 1.1546775081  | 0.4178286589  |
| C114 | 0.7897536175  | 1.7550898337  | -0.4703265619 |
| C115 | 2.0045563789  | 0.9404797229  | -0.633039157  |
| O116 | 0.6479752099  | 2.8719221520  | -0.9642755319 |
| C117 | -0.4052024499 | -0.2314080099 | 0.5305790935  |
| C118 | -1.3698714824 | -0.7456801257 | 1.3860120919  |
| C119 | -2.1577739212 | 0.1010883322  | 2.1551168842  |
| C120 | -1.9864124555 | 1.4781327385  | 2.0658757799  |
| C121 | -1.0443538707 | 1.9994905852  | 1.1933344703  |
| C122 | 3.1591469243  | 1.4339985540  | -1.0925535873 |
| C123 | 4.4223091856  | 0.6887618534  | -1.1299466237 |
| C124 | 4.5700846088  | -0.5629374503 | -0.5131765347 |
| C125 | 5.7896456805  | -1.2174899207 | -0.5435506896 |
| C126 | 6.8796552106  | -0.6535001202 | -1.1985683707 |
| C127 | 6.7447830824  | 0.5786309453  | -1.8255292715 |
| C128 | 5.5271622323  | 1.2483404684  | -1.7828289577 |
| H129 | 1.9507816892  | -0.0864606252 | -0.2939961576 |
| H130 | 0.2203237073  | -0.9238621523 | -0.0428093187 |
| H131 | -1.4903526220 | -1.8221457299 | 1.4605187230  |
| H132 | -2.8938026696 | -0.3101014791 | 2.8397868975  |



|      |               |               |               |
|------|---------------|---------------|---------------|
| H133 | -2.5810599012 | 2.1443495223  | 2.6812475043  |
| H134 | -0.8840357565 | 3.0702077223  | 1.1313353501  |
| H135 | 3.1797748462  | 2.4680553482  | -1.4321671024 |
| H136 | 3.7274863607  | -1.0430674504 | -0.0282956213 |
| H137 | 5.8846012734  | -2.1878991513 | -0.0692569889 |
| H138 | 7.8273734762  | -1.1808565041 | -1.2274651331 |
| H139 | 7.5911978324  | 1.0250900250  | -2.3373803954 |
| H140 | 5.4310468768  | 2.2266273458  | -2.24766902   |
| O141 | 1.5010472123  | -2.0557472881 | -1.0742773553 |
| O142 | 0.6973966943  | -3.2414026595 | -1.3596374124 |
| H143 | 1.0775245045  | -3.8825337013 | -0.7422299    |

## X-ray Crystallographic Data of 13

### ORTEP diagram of 13-PF<sub>6</sub><sup>[2]</sup>

The solvent molecules (acetone and H<sub>2</sub>O) and all hydrogen atoms are omitted for clarity.

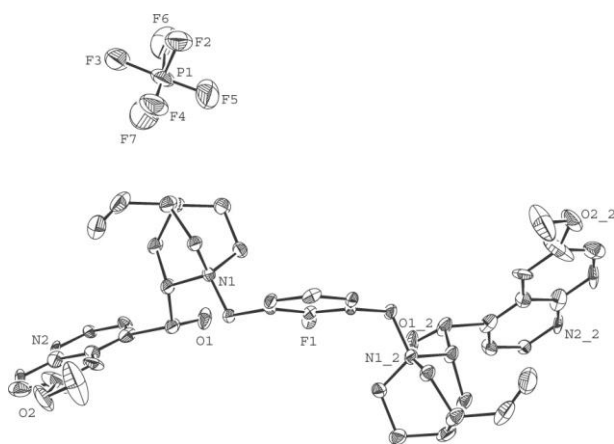

### Stereoview of 13-PF<sub>6</sub>.

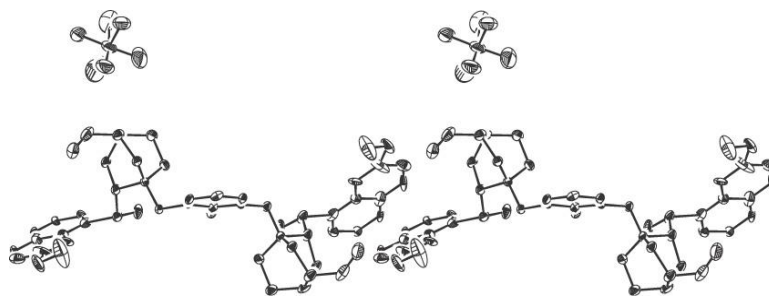

## Crystal data and structure refinement for 13-PF<sub>6</sub>.

|                                   |                                                                                              |                  |
|-----------------------------------|----------------------------------------------------------------------------------------------|------------------|
| Identification code               | 13-PF <sub>6</sub>                                                                           |                  |
| Empirical formula                 | C <sub>48</sub> H <sub>55</sub> F <sub>13</sub> N <sub>4</sub> O <sub>6</sub> P <sub>2</sub> |                  |
| Formula weight                    | 1092.90                                                                                      |                  |
| Temperature                       | 173(2) K                                                                                     |                  |
| Wavelength                        | 0.71073 Å                                                                                    |                  |
| Crystal system                    | Monoclinic                                                                                   |                  |
| Space group                       | C2                                                                                           |                  |
| Unit cell dimensions              | a = 16.396(4) Å                                                                              | α = 90°.         |
|                                   | b = 13.046(3) Å                                                                              | β = 107.386(4)°. |
|                                   | c = 11.979(3) Å                                                                              | γ = 90°.         |
| Volume                            | 2445.1(10) Å <sup>3</sup>                                                                    |                  |
| Z                                 | 2                                                                                            |                  |
| Density (calculated)              | 1.484 mg/m <sup>3</sup>                                                                      |                  |
| Absorption coefficient            | 0.192 mm <sup>-1</sup>                                                                       |                  |
| F(000)                            | 1132                                                                                         |                  |
| Crystal size                      | 1.30 x 0.50 x 0.15 mm <sup>3</sup>                                                           |                  |
| Theta range for data collection   | 1.78 to 25.00°.                                                                              |                  |
| Index ranges                      | -19 ≤ h ≤ 16, -15 ≤ k ≤ 15, -13 ≤ l ≤ 14                                                     |                  |
| Reflections collected             | 5780                                                                                         |                  |
| Independent reflections           | 3827 [R(int) = 0.0155]                                                                       |                  |
| Completeness to theta = 25.00°    | 98.7 %                                                                                       |                  |
| Absorption correction             | Semi-empirical from equivalents                                                              |                  |
| Max. and min. transmission        | 0.9717 and 0.7883                                                                            |                  |
| Refinement method                 | Full-matrix least-squares on F <sup>2</sup>                                                  |                  |
| Data / restraints / parameters    | 3827 / 7 / 383                                                                               |                  |
| Goodness-of-fit on F <sup>2</sup> | 1.044                                                                                        |                  |

|                                      |                                    |
|--------------------------------------|------------------------------------|
| Final R indices [ $I > 2\sigma(I)$ ] | R1 = 0.0813, wR2 = 0.2008          |
| R indices (all data)                 | R1 = 0.0939, wR2 = 0.2134          |
| Absolute structure parameter         | 0.1(3)                             |
| Largest diff. peak and hole          | 0.569 and -0.351 e.Å <sup>-3</sup> |

## References

1. E. Denmark, S. Deconstructing Quinine. Part 1. Toward an Understanding of the Remarkable Performance of Cinchona Alkaloids in Asymmetric Phase Transfer Catalysis. *HETEROCYCLES* **2010**, *82*, 1527
2. Jew, S.; Lee, J.-H.; Jeong, B.-S.; Yoo, M.-S.; Kim, M.-J.; Lee, Y.-J.; Lee, J.; Choi, S.; Lee, K.; Lah, M. S.; Park, H. Highly Enantioselective Epoxidation of 2,4-Diarylenones by Using Dimeric Cinchona Phase-Transfer Catalysts: Enhancement of Enantioselectivity by Surfactants. *Angew. Chem. Int. Ed.* **2005**, *44*, 1383–1385.
3. Johnson, K. M.; Rattley, M. S.; Sladojevich, F.; Barber, D. M.; Nuñez, M. G.; Goldys, A. M.; Dixon, D. J. A New Family of Cinchona-Derived Bifunctional Asymmetric Phase-Transfer Catalysts: Application to the Enantio- and Diastereoselective Nitro-Mannich Reaction of Amidosulfones. *Org. Lett.* **2012**, *14*, 2492–2495.
4. Lee, J.; Ban, J. W.; Kim, J.; Yang, S.; Lee, G.; Dhorma, L. P.; Kim, M.; Ha, M. W.; Hong, S.; Park, H. Asymmetric Phase-Transfer Catalytic Aza-Michael Addition to Cyclic Enone: Highly Enantioselective and Diastereoselective Synthesis of Cyclic 1,3-Aminoalcohols. *Org. Lett.* **2022**, *24*, 1647–1651.
5. Ooi, T.; Doda, K.; Maruoka, K. Designer Chiral Quaternary Ammonium Bifluorides as an Efficient Catalyst for Asymmetric Nitroaldol Reaction of Silyl Nitronates with Aromatic Aldehydes. *J. Am. Chem. Soc.* **2003**, *125*, 2054–2055.
6. Tashiro, M.; Fujimoto, H.; Tsuge, A.; Mataka, S.; Kobayashi, H. Metacyclophanes and Related Compounds. 23. Preparation of Fluorinated [2,2]Metacyclophanes. *J. Org. Chem.* **1989**, *54*, 2012–2015.
7. Du, T.; Du, F.; Ning, Y.; Peng, Y. Organocatalytic Enantioselective 1,3-Dipolar Cycloadditions between Seyferth–Gilbert Reagent and Isatylidene Malononitriles: Synthesis of Chiral Spiro-Phosphonylpyrazoline-Oxindoles. *Org. Lett.* **2015**, *17*, 1308–1311.
8. Ding, R.; Zheng, B.; Wang, Y.; Peng, Y. A Cation-Directed Enantioselective Sulfur-Mediated Michael/Mannich Three-Component Domino Reaction Involving Chalcones as Michael Acceptors. *Org. Lett.* **2015**, *17*, 4128–4131.
9. Tang, P.; Furuya, T.; Ritter, T. Silver-Catalyzed Late-Stage Fluorination. *J. Am. Chem. Soc.* **2010**, *132*, 12150–12154.
10. Salehi Marzizarani, N.; Lam, Y.; Wang, X.; Klapars, A.; Qi, J.; Song, Z.; Sherry, B. D.; Liu, Z.; Ji, Y. New Mechanism for Cinchona Alkaloid-Catalysis Allows for an Efficient Thiophosphorylation Reaction. *J. Am. Chem. Soc.* **2020**, *142*, 20021–20029.
11. Breman, A. C.; van der Heijden, G.; van Maarseveen, J. H.; Ingemann, S.; Hiemstra, H. Synthetic and Organocatalytic Studies of Quinidine Analogues with Ring-Size Modifications in the Quinuclidine Moiety. *Chem. Eur. J.* **2016**, *22*, 14247–14256.
12. Dinio, T.; Gorka, A. P.; McGinniss, A.; Roepe, P. D.; Morgan, J. B. Investigating the Activity of Quinine Analogues versus Chloroquine Resistant Plasmodium Falciparum. *Bioorganic & Medicinal Chemistry* **2012**, *20*, 3292–3297.
13. Waddell, T. G.; Rambalakovs, T.; Christie, K. R. An Example of Regioselective Esterification by Intramolecular Acyl Transfer from a Tertiary Amine. *J. Org. Chem.* **1990**, *55*, 4765–4767.

14. Hu, B.; Bezpalko, M. W.; Fei, C.; Dickie, D. A.; Foxman, B. M.; Deng, L. Origin of and a Solution for Uneven Efficiency by Cinchona Alkaloid-Derived, Pseudoenantiomeric Catalysts for Asymmetric Reactions. *J. Am. Chem. Soc.* **2018**, *140*, 13913–13920.
15. Majdecki, M.; Tyszka-Gumkowska, A.; Jurczak, J. Highly Enantioselective Epoxidation of  $\alpha,\beta$ -Unsaturated Ketones Using Amide-Based *Cinchona* Alkaloids as Hybrid Phase-Transfer Catalysts. *Org. Lett.* **2020**, *22*, 8687–8691.
16. Wang, B.; Miao, C.; Wang, S.; Xia, C.; Sun, W. Manganese Catalysts with  $C_1$ -Symmetric  $N_4$  Ligand for Enantioselective Epoxidation of Olefins. *Chem. Eur. J.* **2012**, *18*, 6750–6753.
17. Zeng, C.; Yuan, D.; Zhao, B.; Yao, Y. Highly Enantioselective Epoxidation of  $\alpha,\beta$ -Unsaturated Ketones Catalyzed by Rare-Earth Amides  $[(Me_3Si)_2N]_3RE(\mu-Cl)Li(THF)_3$  with Phenoxy-Functionalized Chiral Prolinols. *Org. Lett.* **2015**, *17*, 2242–2245.
18. Zhang, L.-W.; Wang, L.; Ji, N.; Dai, S.-Y.; He, W. Asymmetric Epoxidation of  $\alpha,\beta$ -Unsaturated Ketones via an Amine-Thiourea Dual Activation Catalysis. *Tetrahedron Letters* **2021**, *68*, 152941.
19. Hu, F.; Chen, Z.; Tan, Y.; Xu, D.; Huang, S.; Jia, S.; Gong, X.; Qin, W.; Yan, H. Organocatalytic Enantioselective  $\gamma$ -Elimination: Applications in the Preparation of Chiral Peroxides and Epoxides. *Org. Lett.* **2020**, *22*, 1934–1940.
20. Lattanzi, A. Bis(3,5-Dimethylphenyl)-(S)-Pyrrolidin-2-Ylmethanol: An Improved Organocatalyst for the Asymmetric Epoxidation of  $\alpha,\beta$ -Enones. *Adv. Synth. Catal.* **2006**, *348*, 339–346.
21. Xia, X.; Lu, C.; Zhao, B.; Yao, Y. Lanthanide Complexes Combined with Chiral Salen Ligands: Application in the Enantioselective Epoxidation Reaction of  $\alpha,\beta$ -Unsaturated Ketones. *RSC Adv.* **2019**, *9*, 13749–13756.
22. Luo, W.; Yu, Z.; Qiu, W.; Yang, F.; Liu, X.; Tang, J. One-Pot Production of Chiral  $\alpha,\beta$ -Epoxy Ketones from Benzaldehydes and Acetophenones by Recyclable Poly(Amino Acid) Catalysis. *Tetrahedron* **2011**, *67*, 5289–5292.
23. Qian, Q.; Tan, Y.; Zhao, B.; Feng, T.; Shen, Q.; Yao, Y. Asymmetric Epoxidation of Unsaturated Ketones Catalyzed by Heterobimetallic Rare Earth–Lithium Complexes Bearing Phenoxy-Functionalized Chiral Diphenylprolinolate Ligand. *Org. Lett.* **2014**, *16*, 4516–4519.
24. Wu, M.; Miao, C. X.; Wang, S.; Hu, X.; Xia, C.; Kühn, F. E.; Sun, W. Chiral Bioinspired Non-Heme Iron Complexes for Enantioselective Epoxidation of  $\alpha,\beta$ -Unsaturated Ketones. *Adv. Synth. Catal.* **2011**, *353*, 3014–3022.
25. Wang, B.; Wang, S.; Xia, C.; Sun, W. Highly Enantioselective Epoxidation of Multisubstituted Enones Catalyzed by Non-Heme Iron Catalysts. *Chem. Eur. J.* **2012**, *18*, 7332–7335.
26. Jaszczewska-Adamczak, J. A.; mLynarski, J. Asymmetric Epoxidation of Enones Promoted by Dinuclear Magnesium Catalyst. *Adv. Synth. Catal.* **2021**, *363*, 4247–4255.
27. Lee, J. H.; Yoo, M. S.; Jung, J. H.; Jew, S. sup; Park, H. geun; Jeong, B. S. Polymeric Chiral Phase-Transfer Catalysts Derived from Cinchona Alkaloids for Enantioselective Synthesis of  $\alpha$ -Amino Acids. *Tetrahedron* **2007**, *63* (33), 7906–7915.
28. Liu, S.; Liebeskind, L. S. A Simple, Modular Synthesis of Substituted Pyridines. *J. Am. Chem. Soc.* **2008**, *130* (22), 6918–6919.
29. Li, W.; Wu, X. F. Ruthenium-Catalyzed Conjugate Hydrogenation of  $\alpha,\beta$ -Enones by in Situ Generated Dihydrogen from Paraformaldehyde and Water. *European J. Org. Chem.* **2015**, *2015* (2), 331–335.
30. Kerr, W. J.; Mudd, R. J.; Paterson, L. C.; Brown, J. A. Iridium(I)-Catalyzed Regioselective C-H Activation and Hydrogen-Isotope Exchange of Non-Aromatic Unsaturated Functionality. *Chem. - A*

*Eur. J.* **2014**, 20 (45), 14604–14607.

<sup>1</sup>H-NMR of compound 5 (DMSO-d<sub>6</sub>, 300MHz)

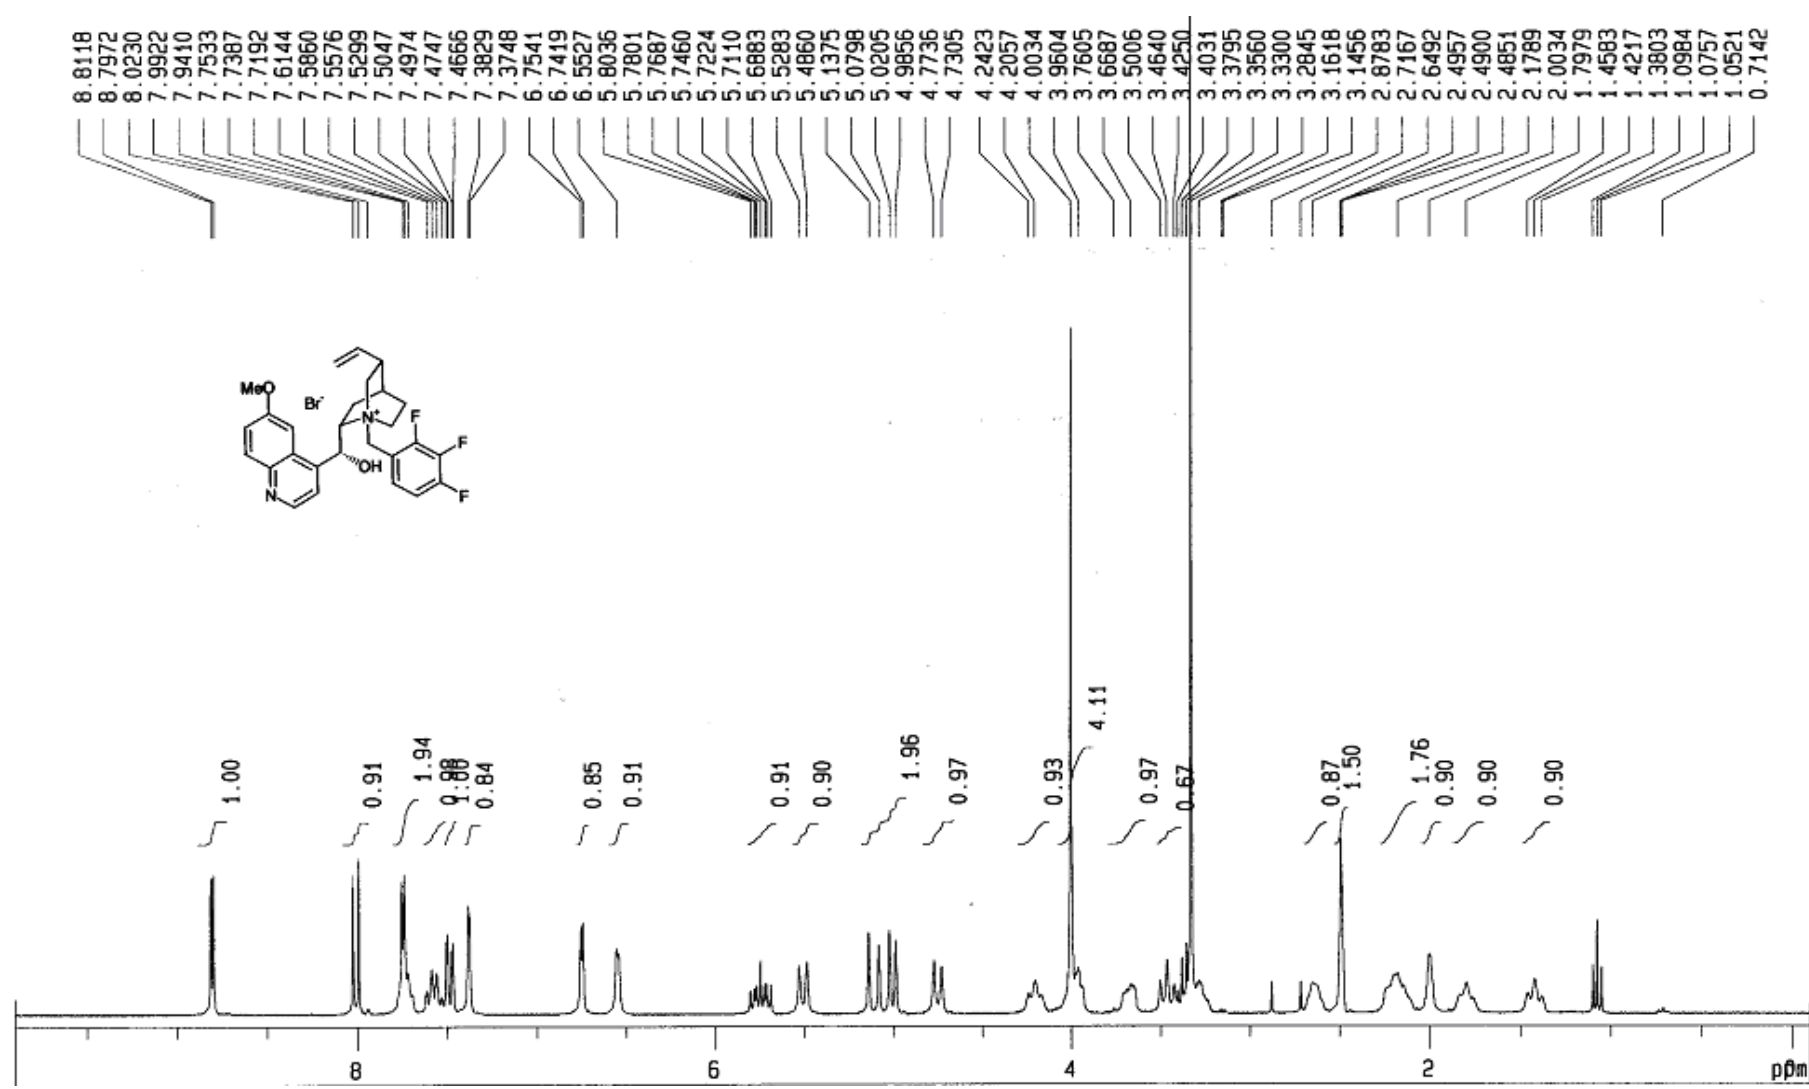



<sup>13</sup>C-NMR of compound **5** (DMSO-d<sub>6</sub>, 75MHz)

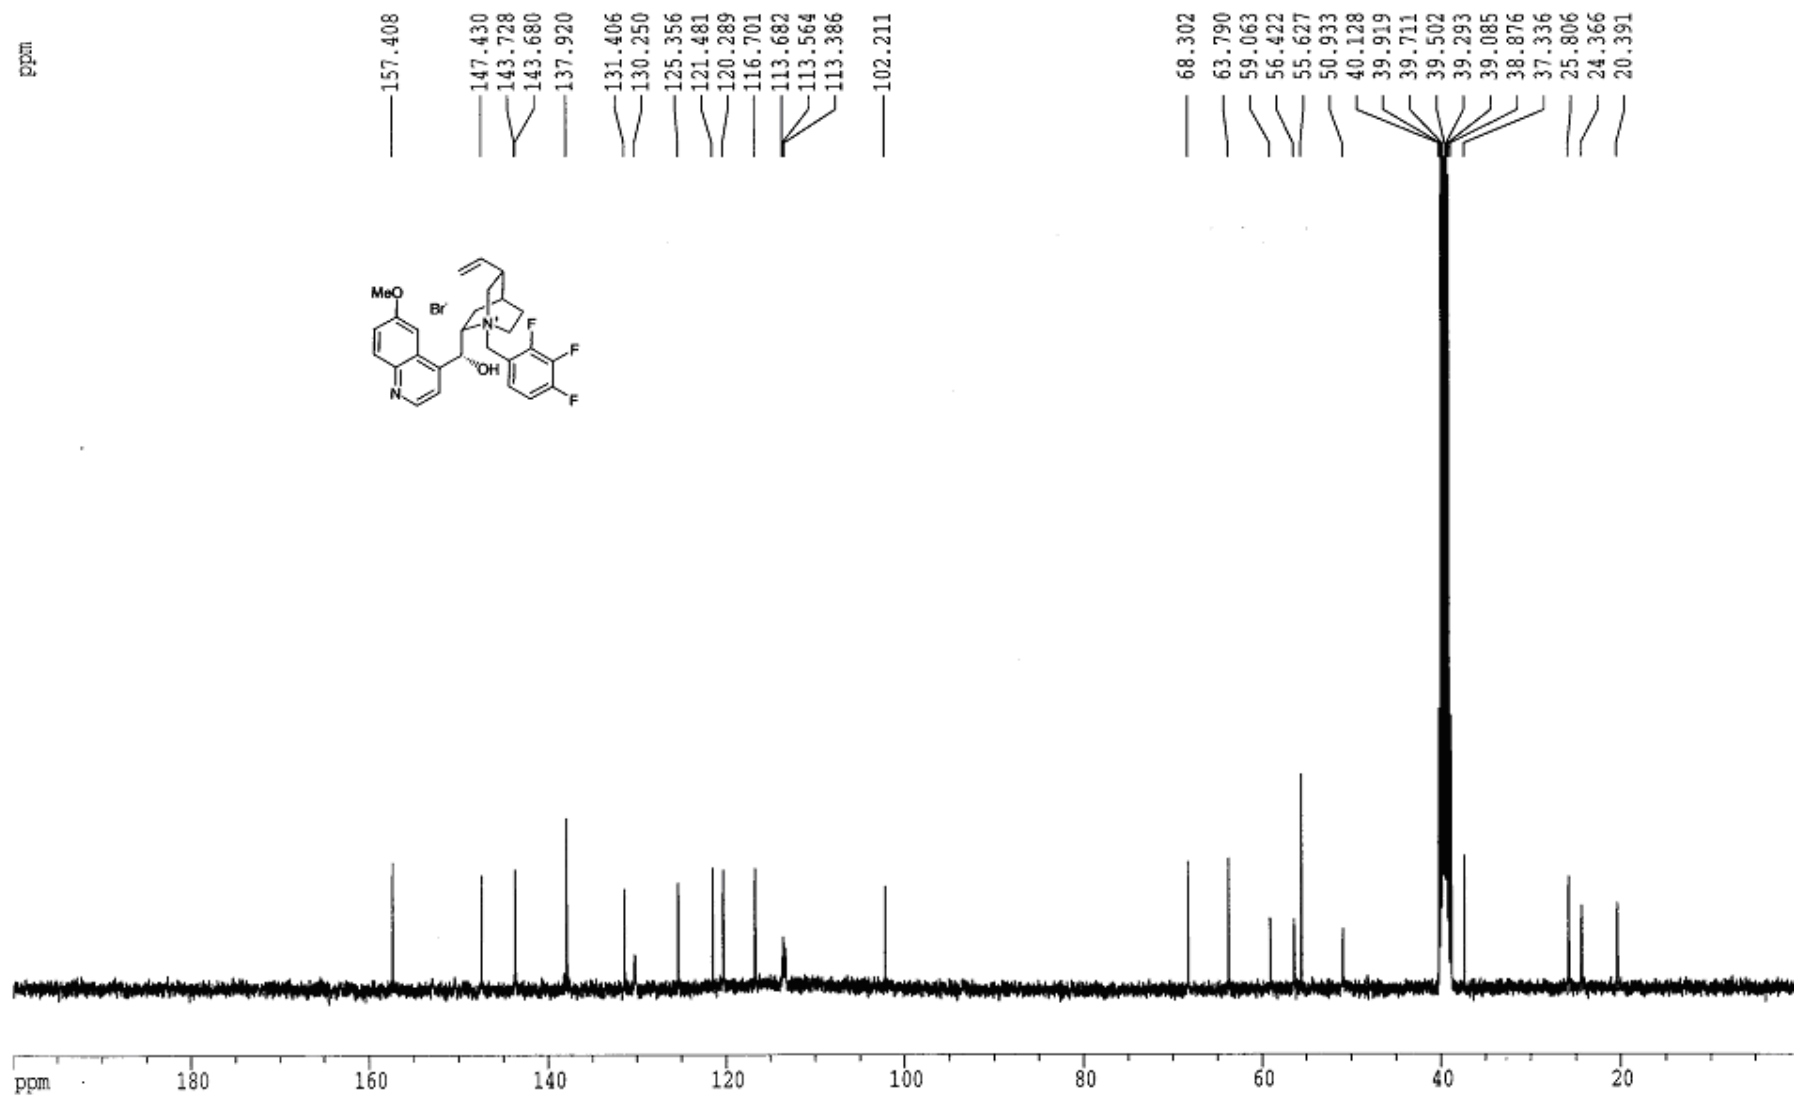

<sup>1</sup>H-NMR of compound **10** (DMSO-d<sub>6</sub>, 300MHz)

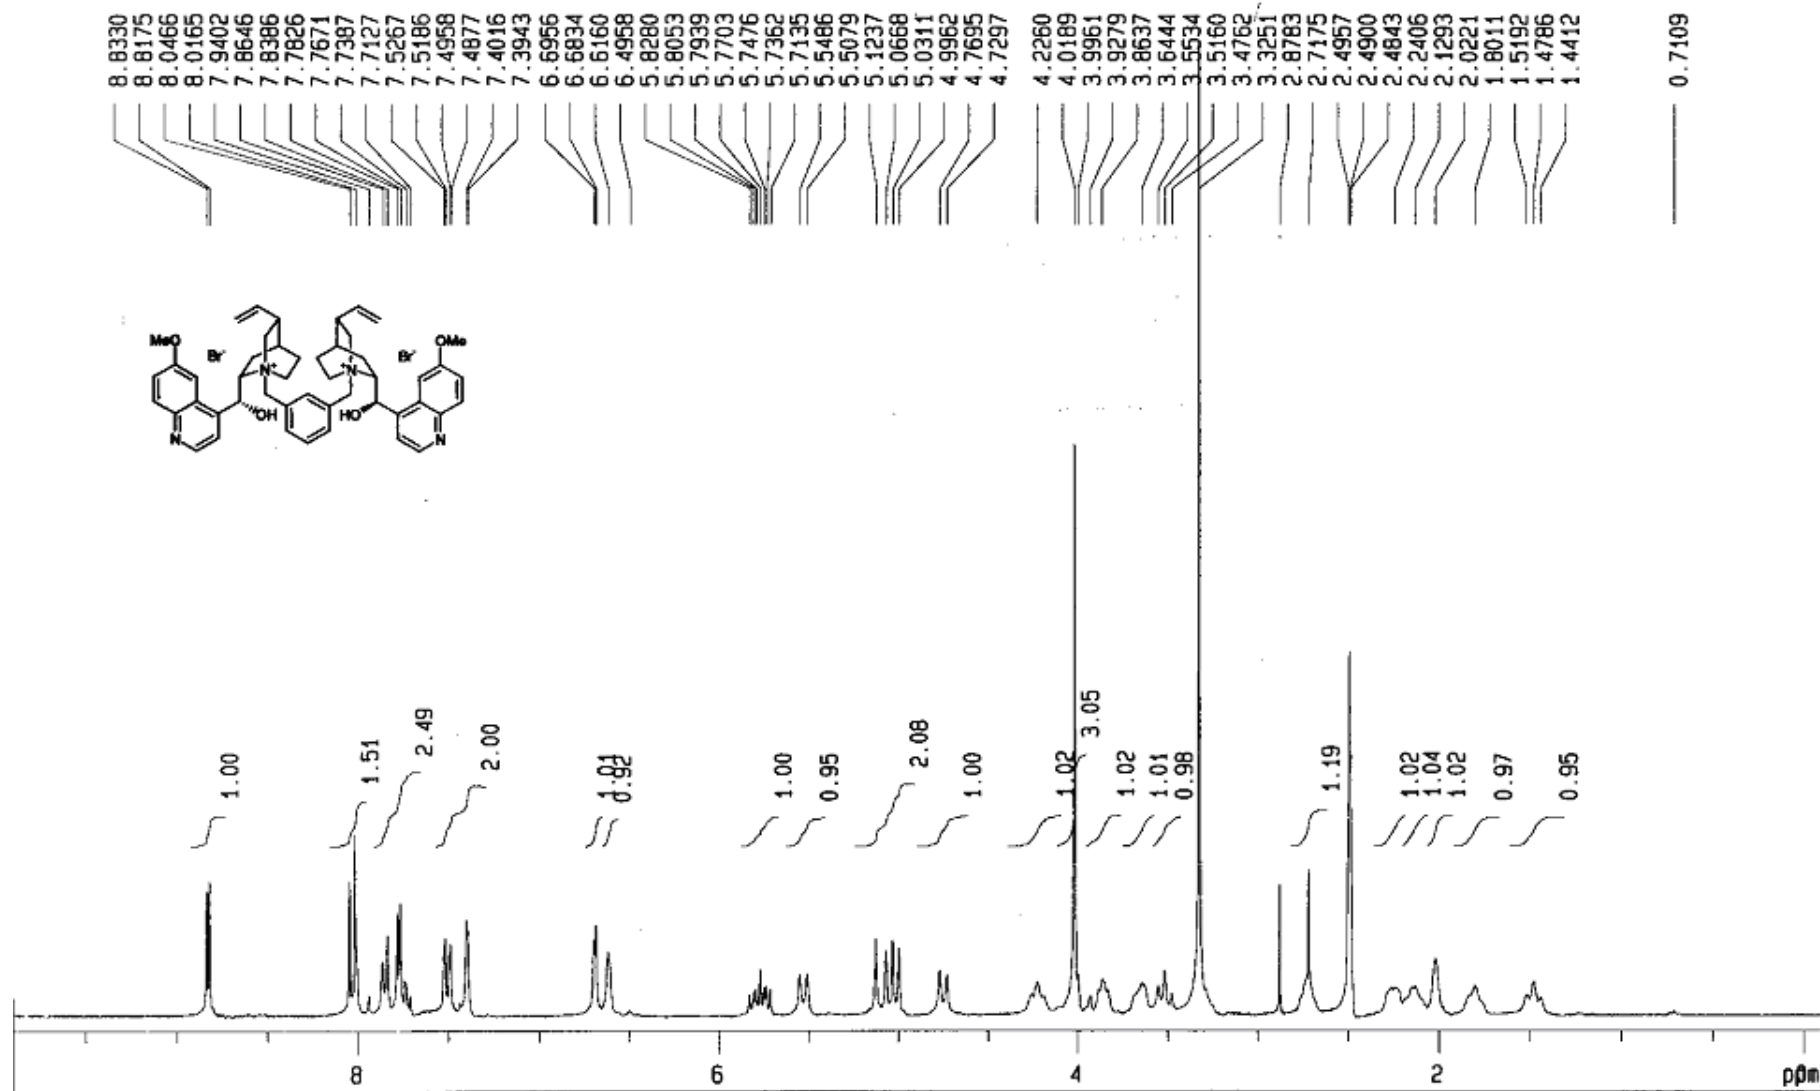

<sup>13</sup>C-NMR of compound **10** (DMSO-d<sub>6</sub>, 75MHz)

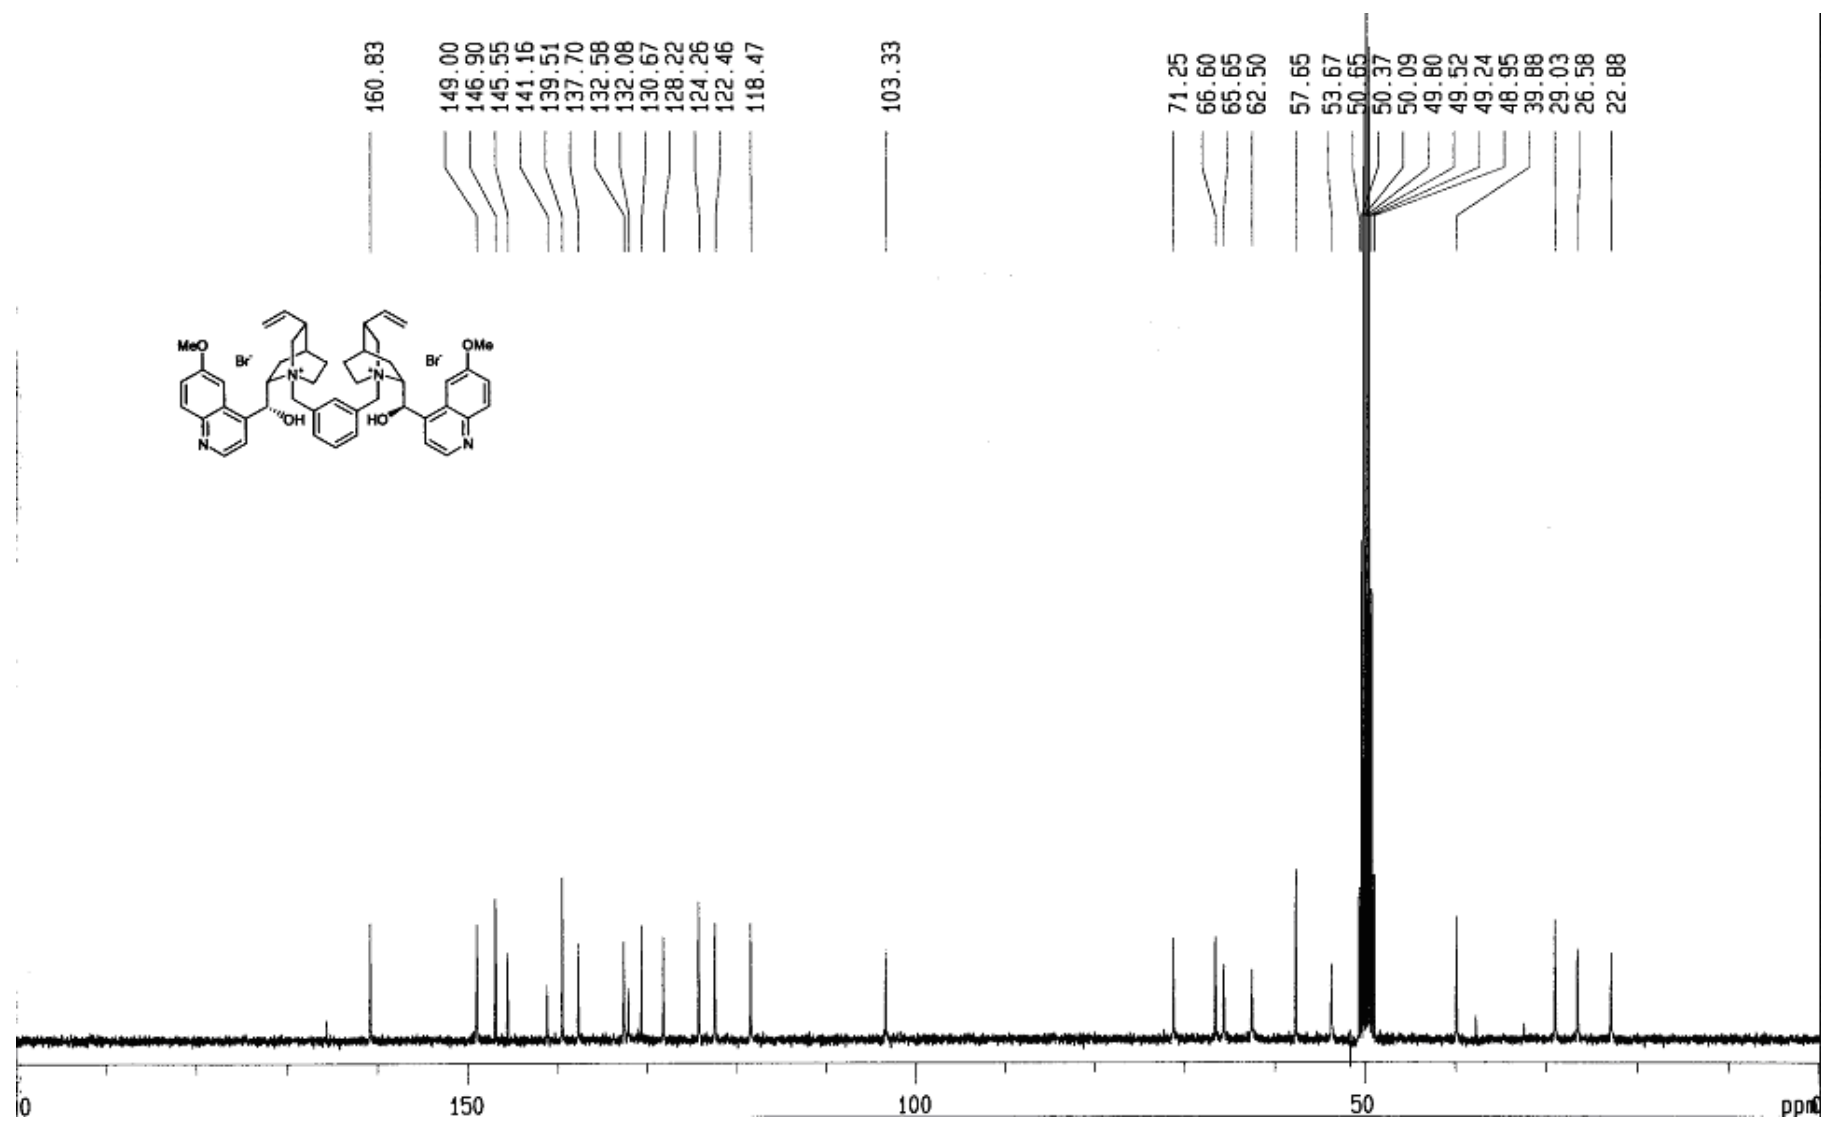

<sup>1</sup>H-NMR of compound **11**

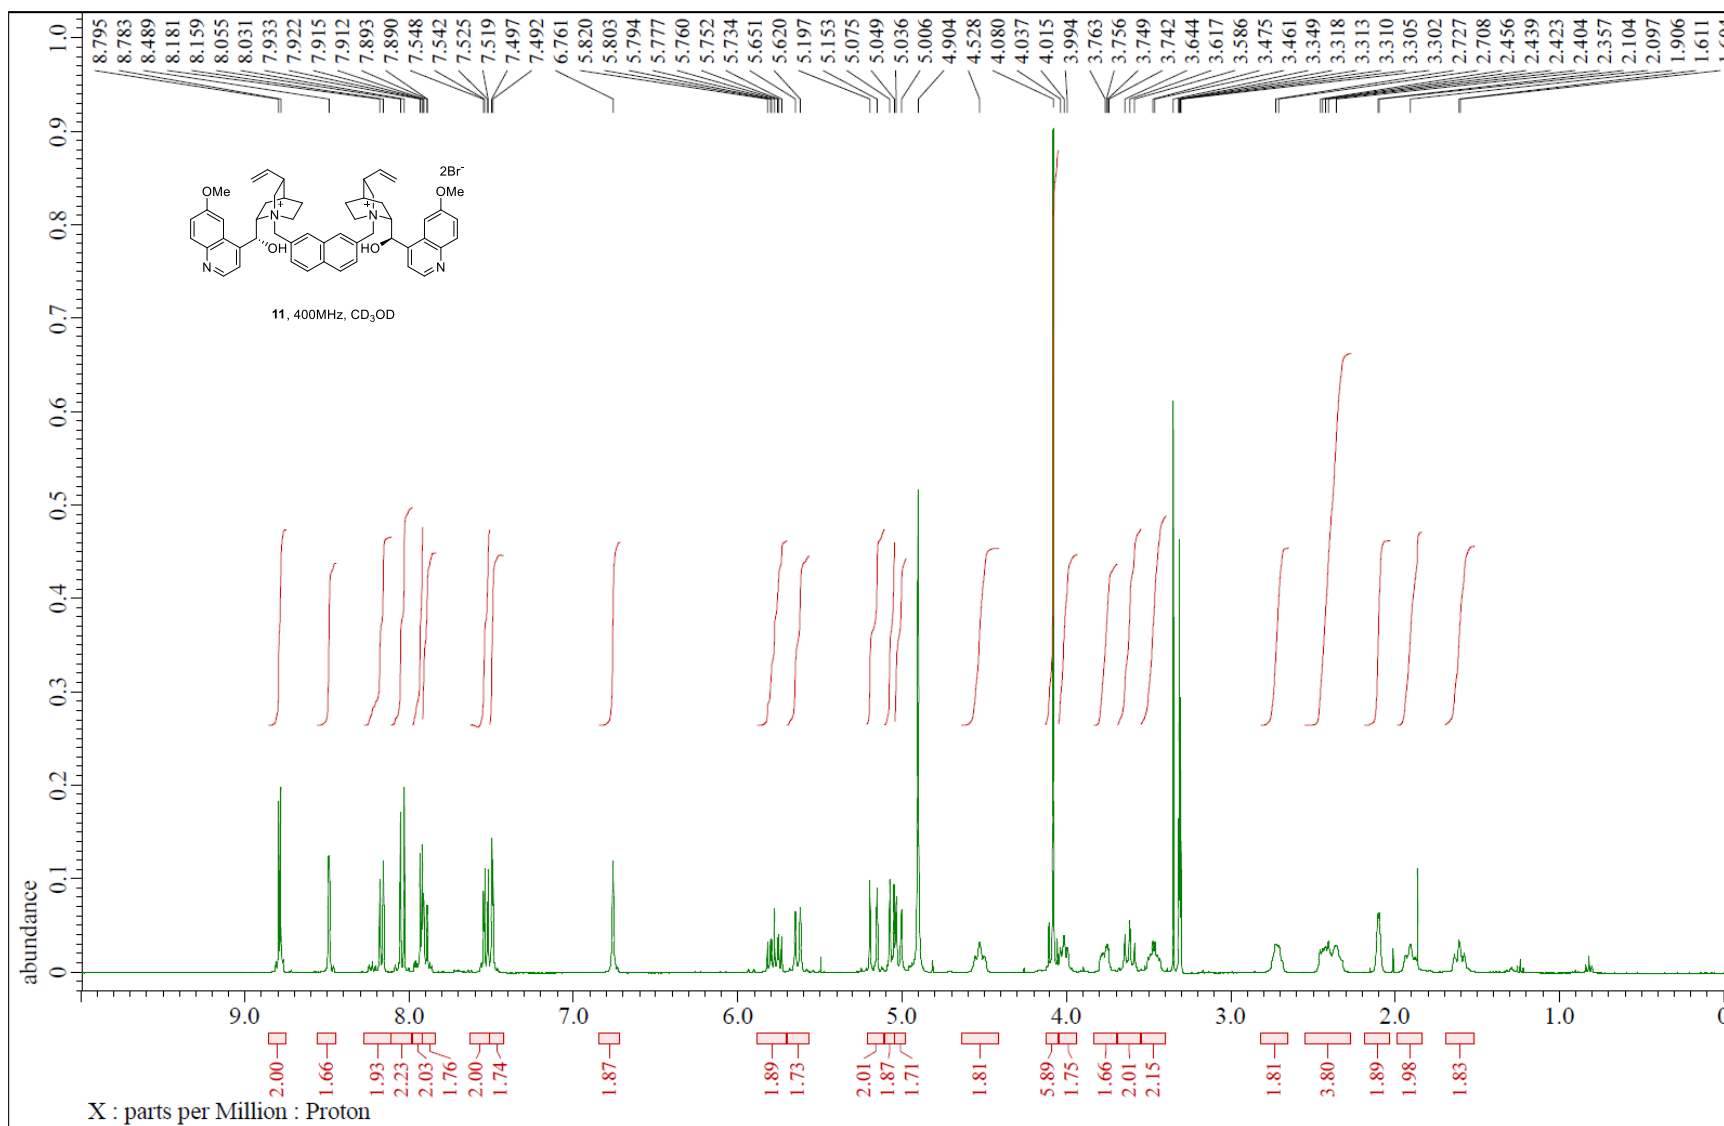

<sup>13</sup>C-NMR of compound **11**

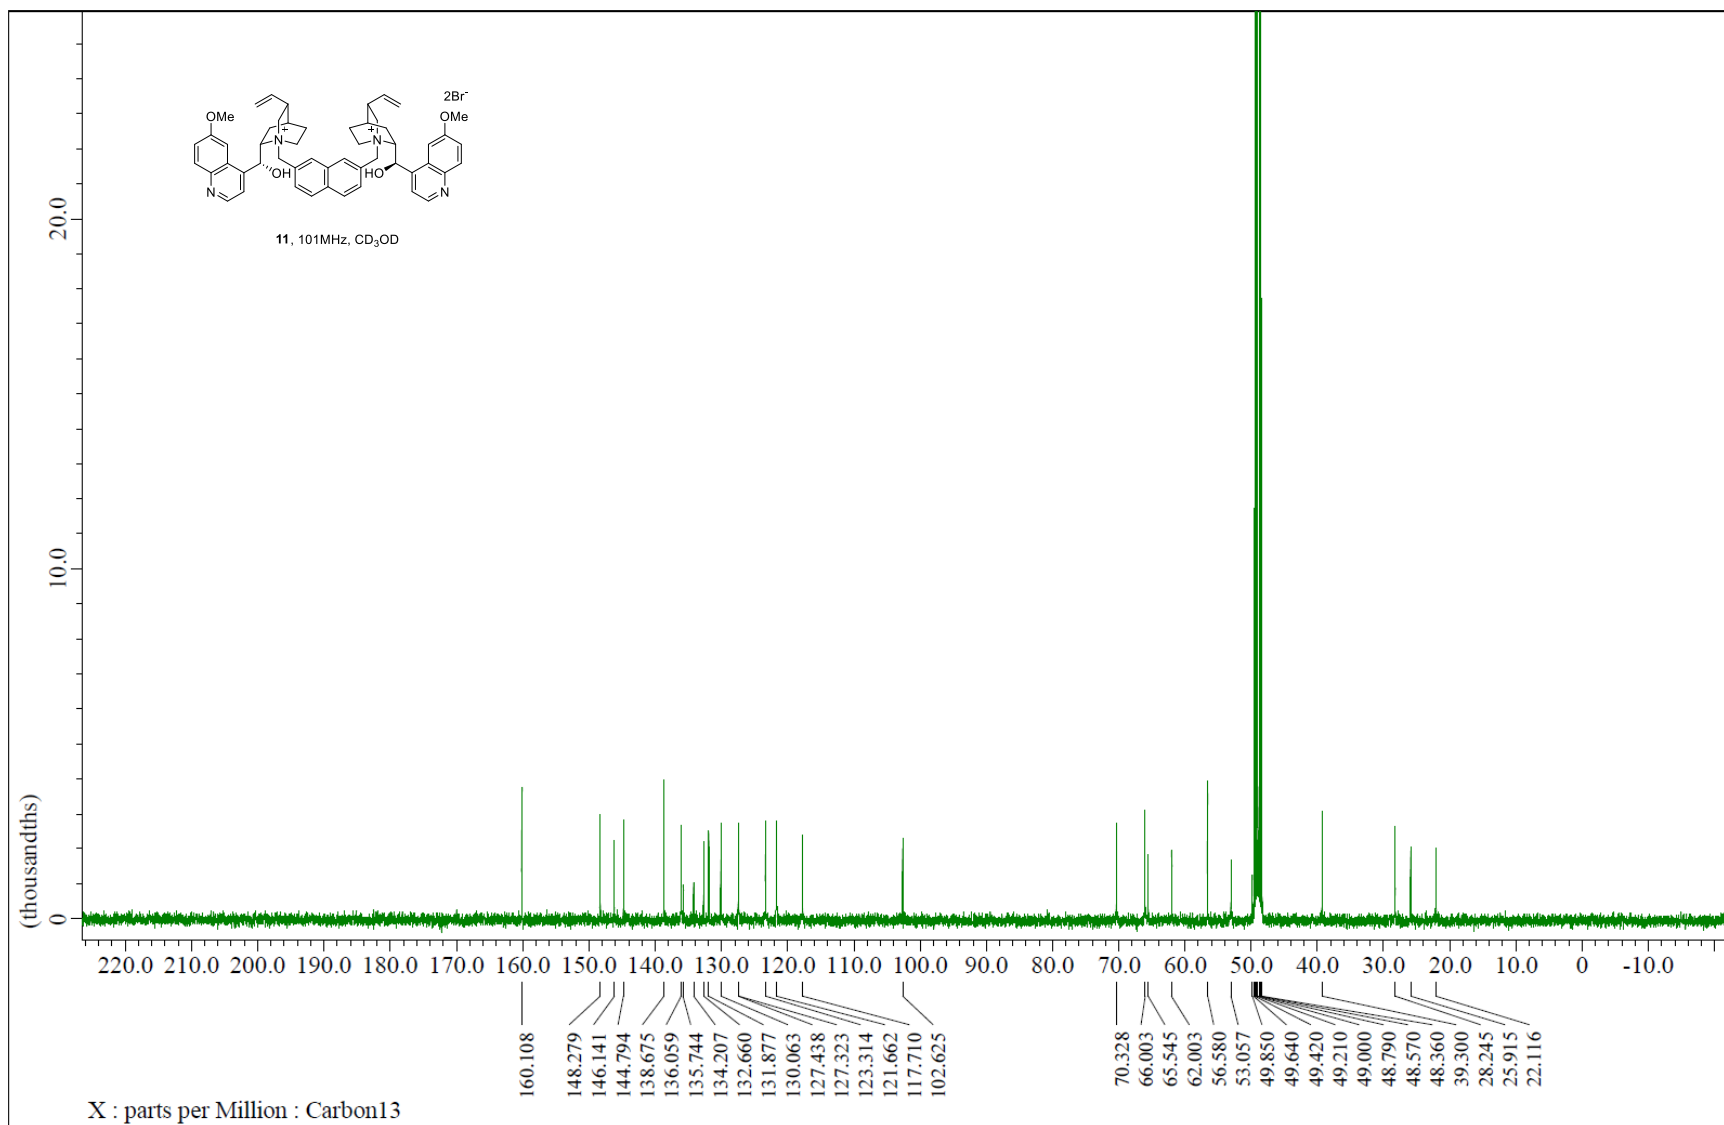

<sup>1</sup>H-NMR of compound **12** (DMSO-d<sub>6</sub>, 300MHz)

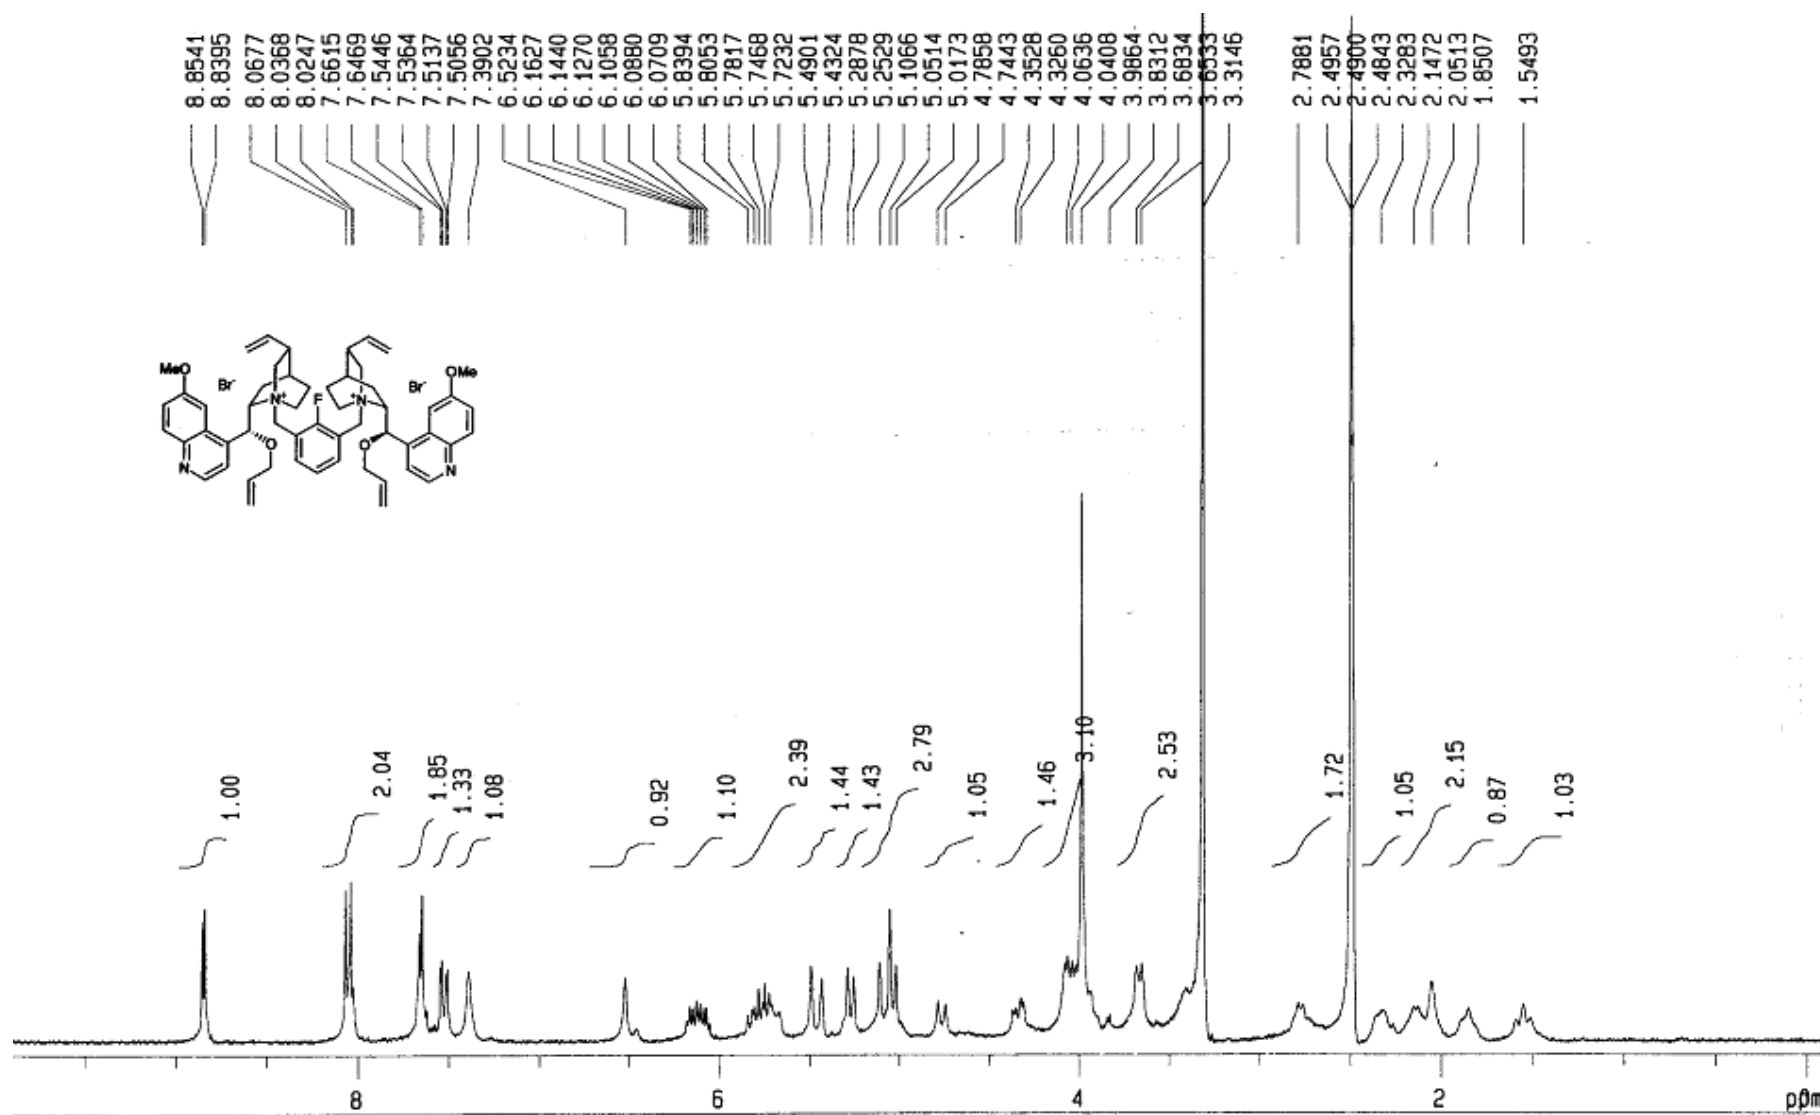

<sup>13</sup>C-NMR of compound **12** (DMSO-d<sub>6</sub>, 75MHz)

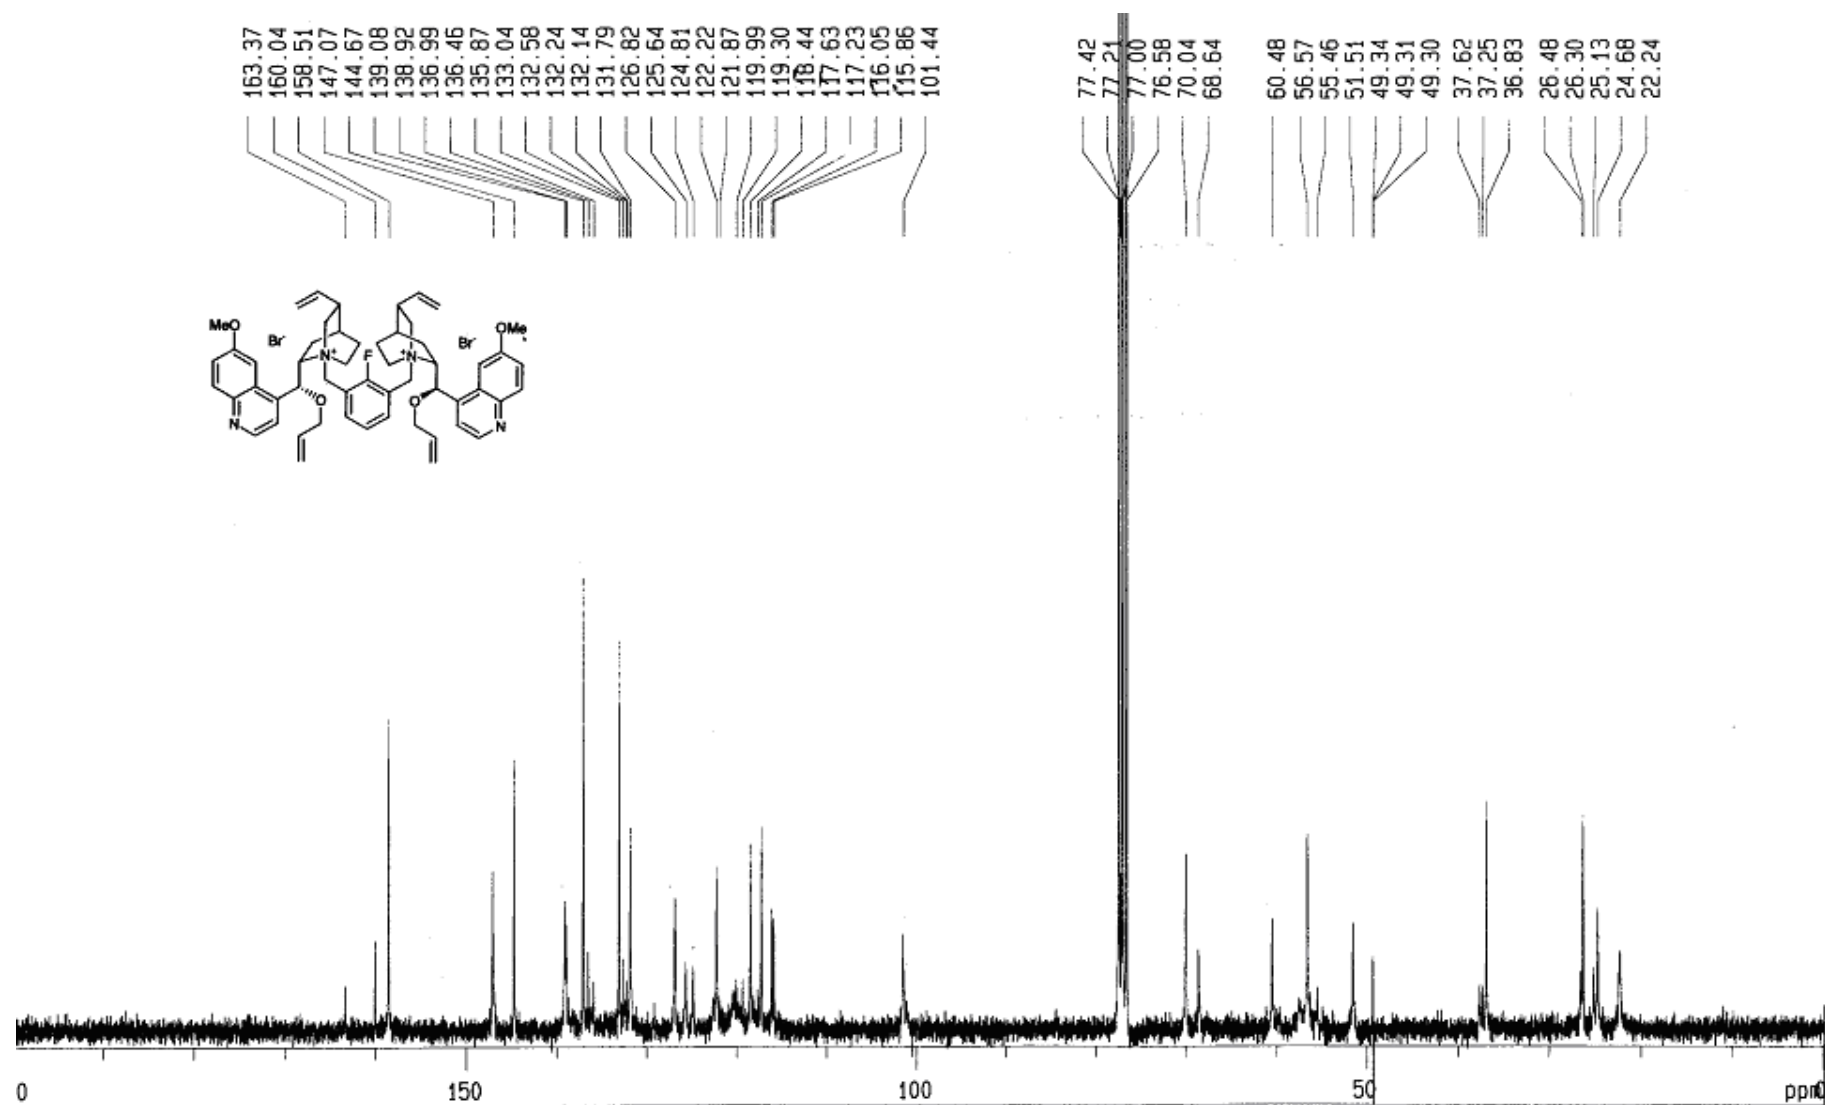

<sup>1</sup>H-NMR of compound 13

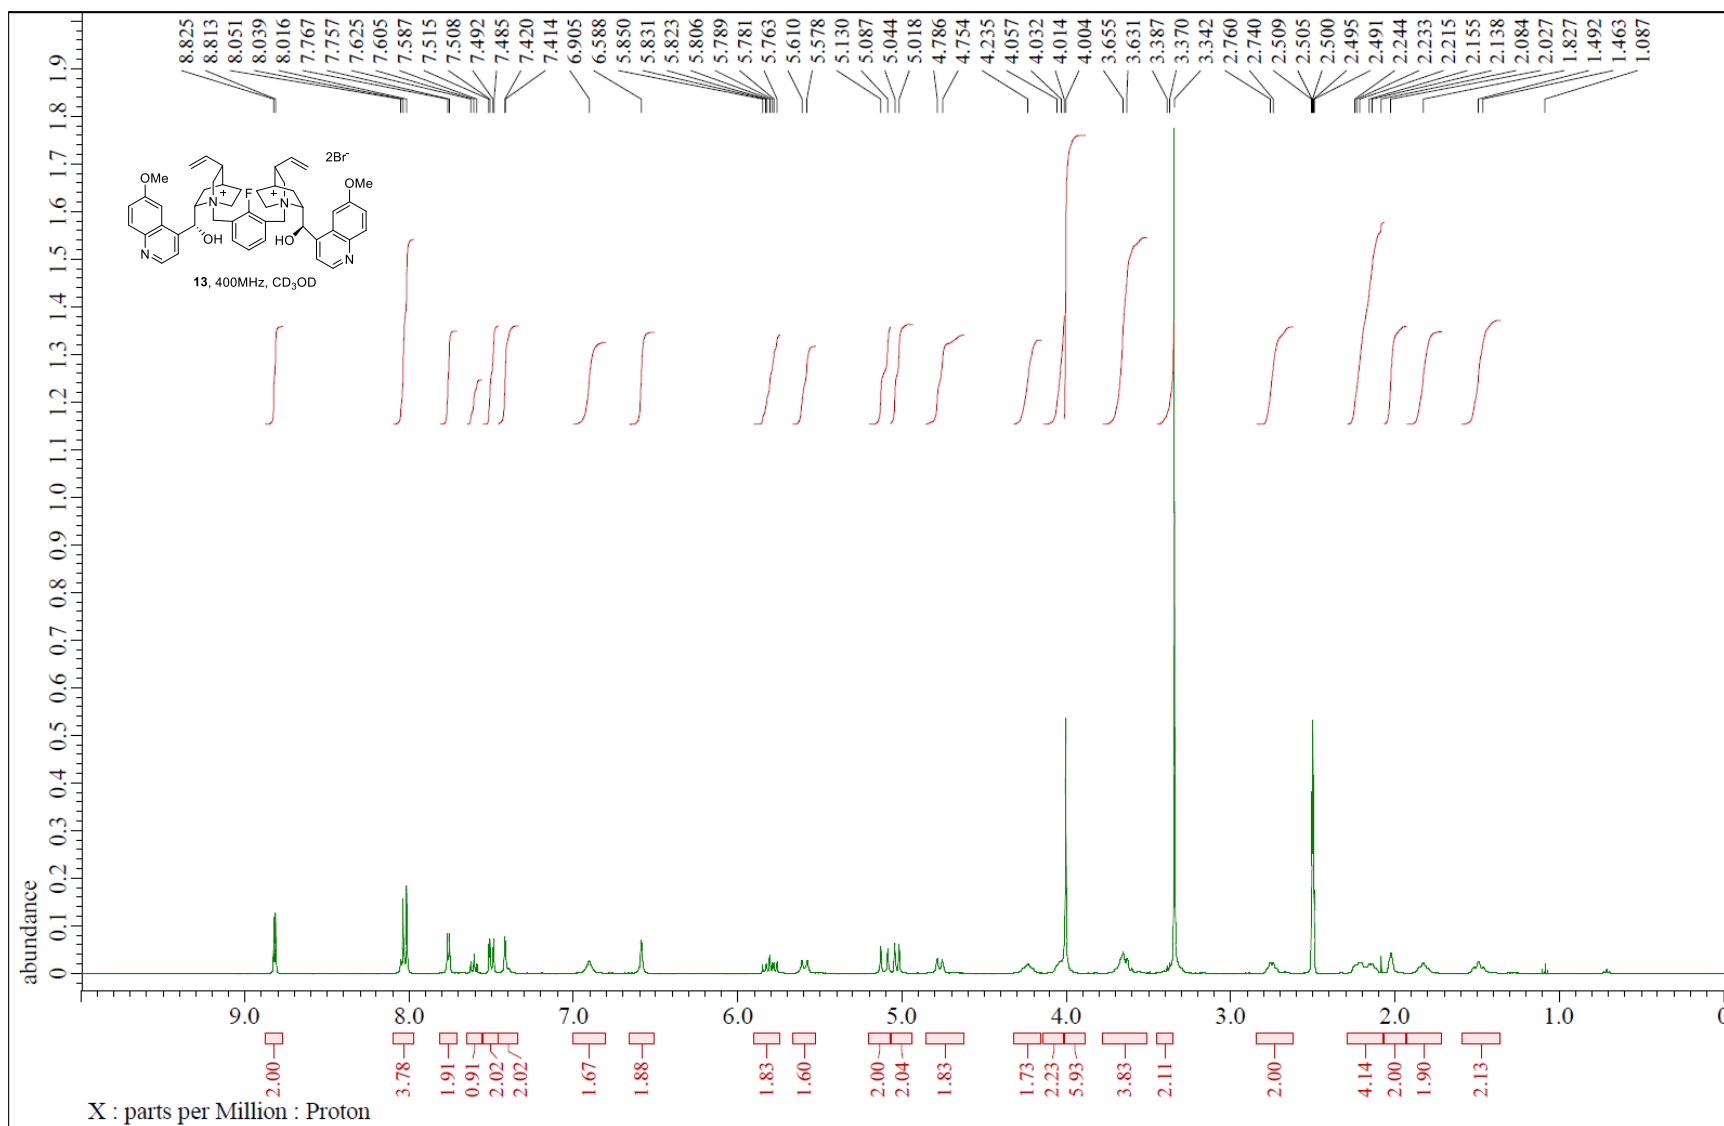



<sup>13</sup>C-NMR of compound **13**

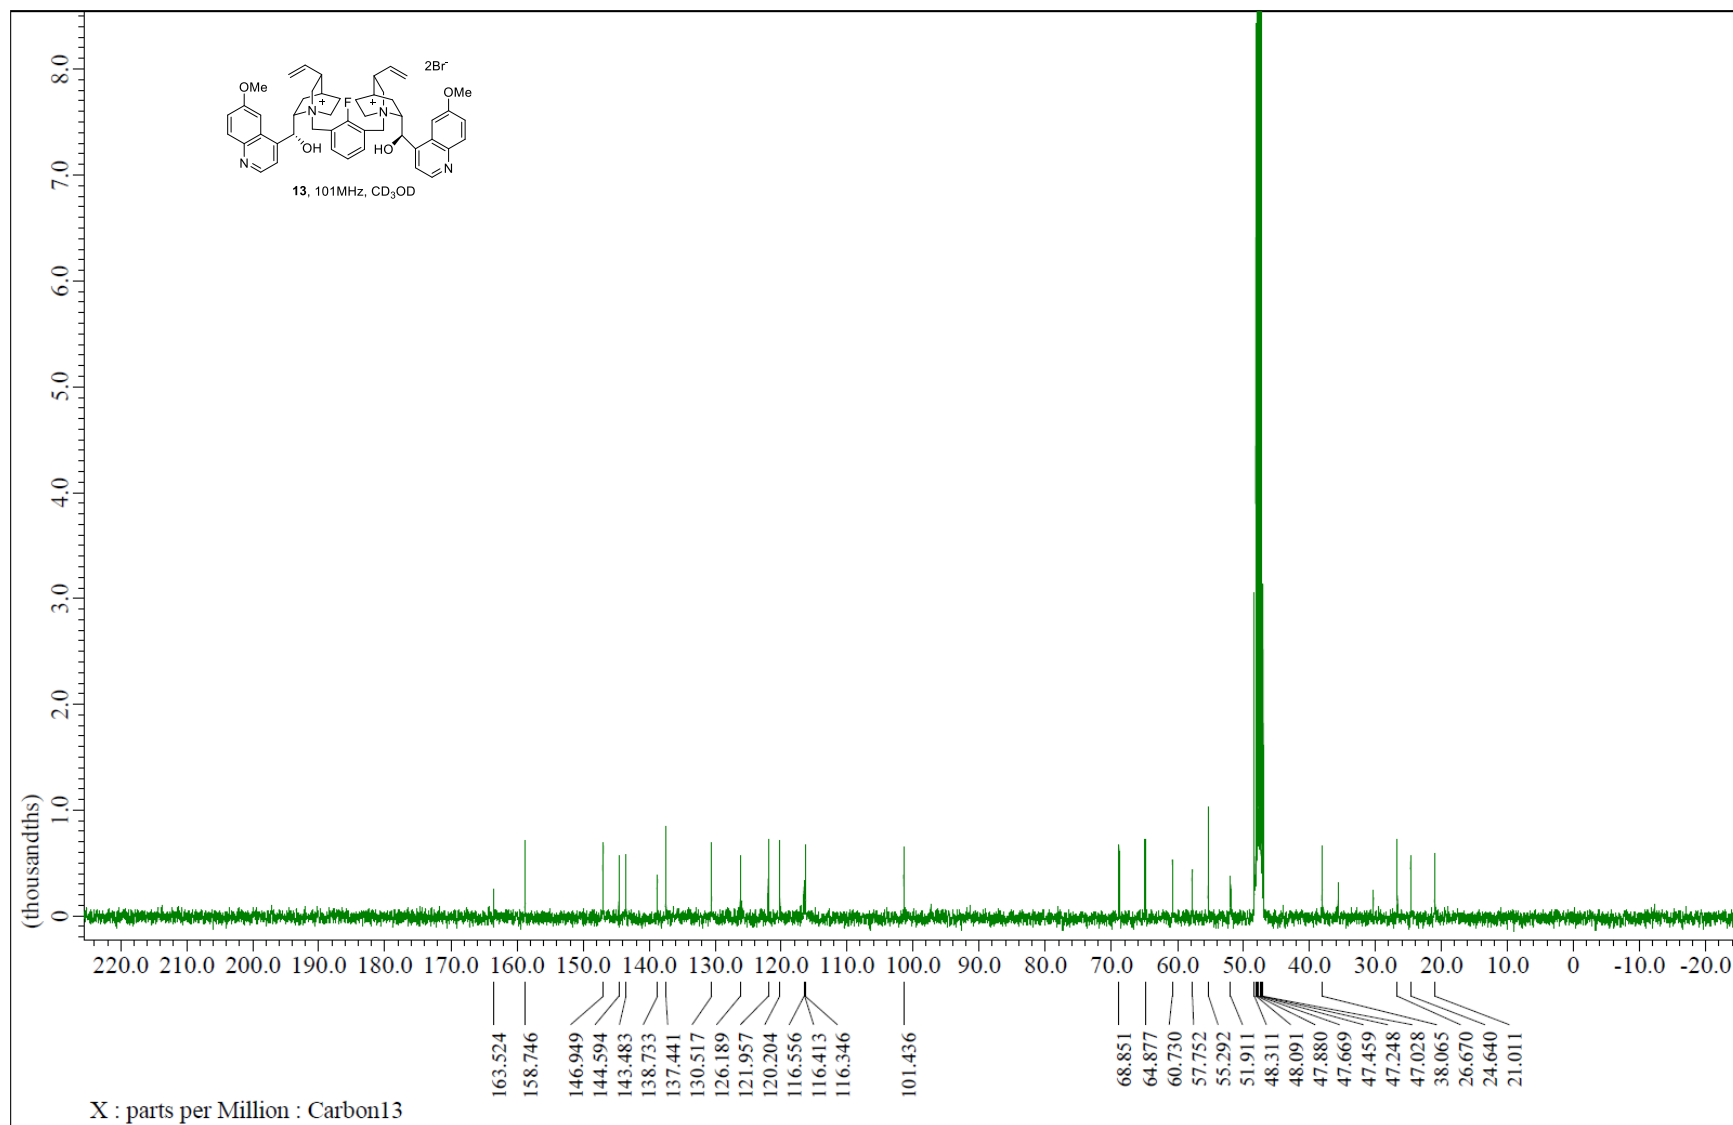

<sup>1</sup>H-NMR of compound C(9)(S)-epi-13 (DMSO-d<sub>6</sub>, 400MHz)

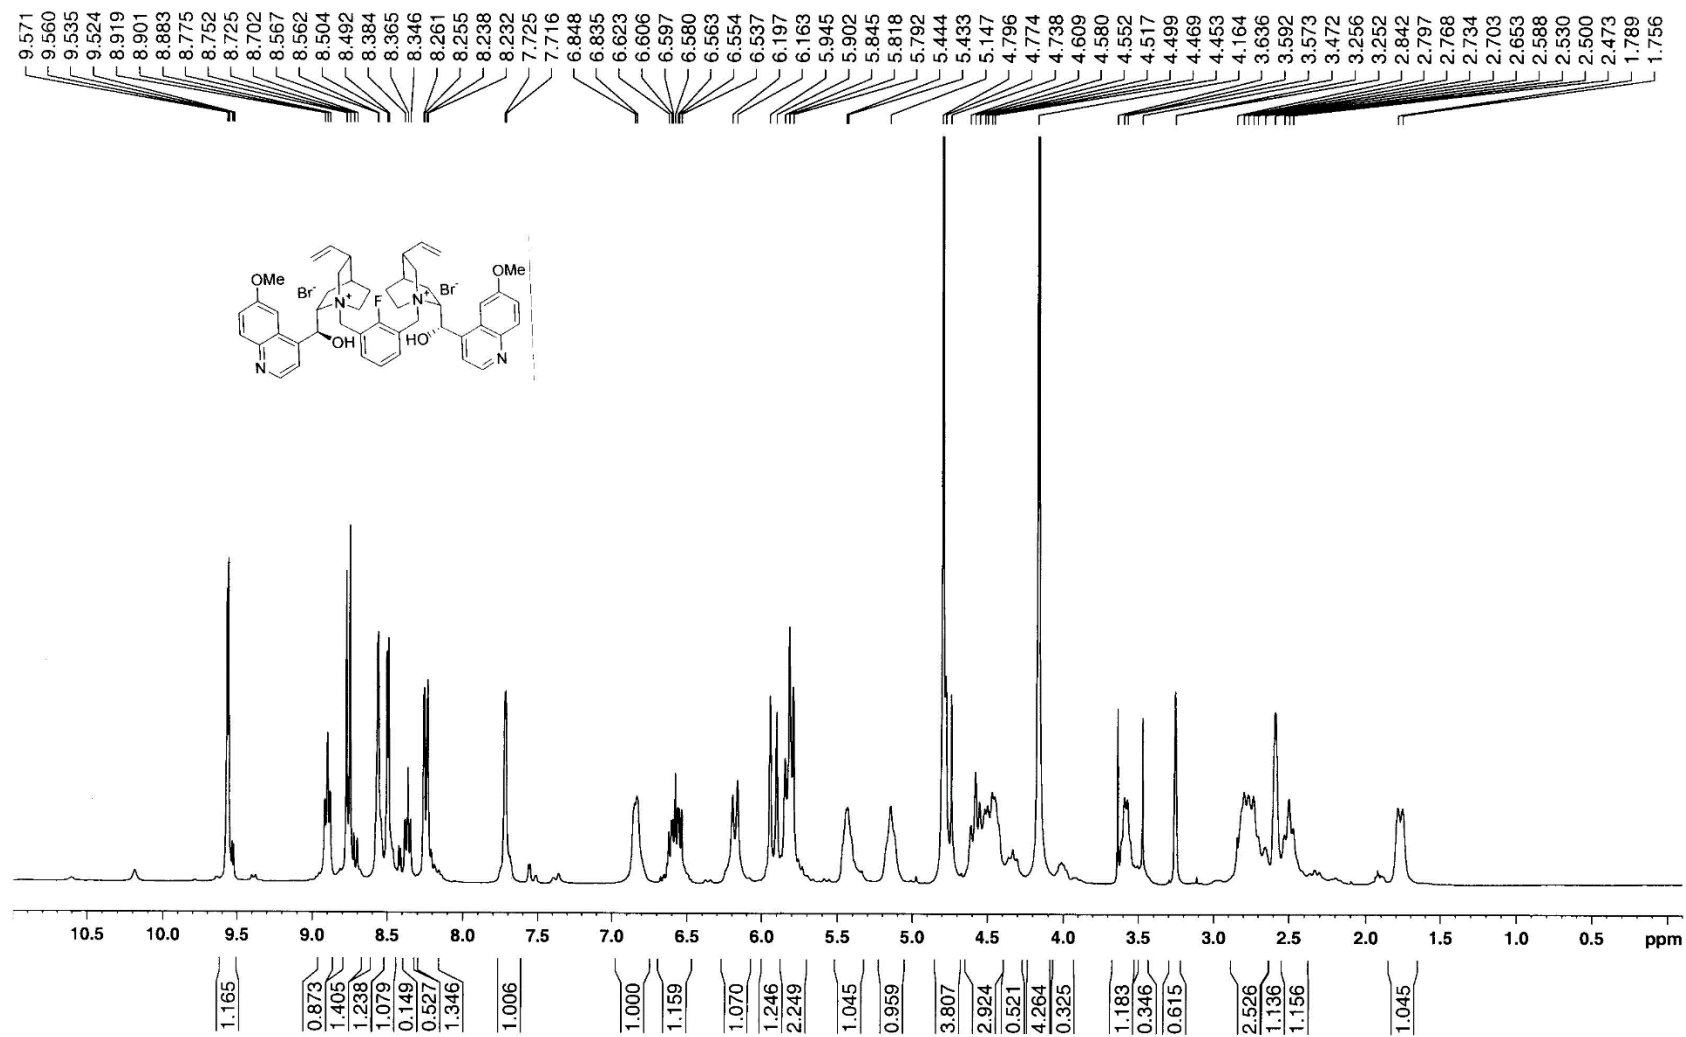

<sup>13</sup>C-NMR of compound C(9)(S)-epi-13 (DMSO-d<sub>6</sub>, 101MHz)

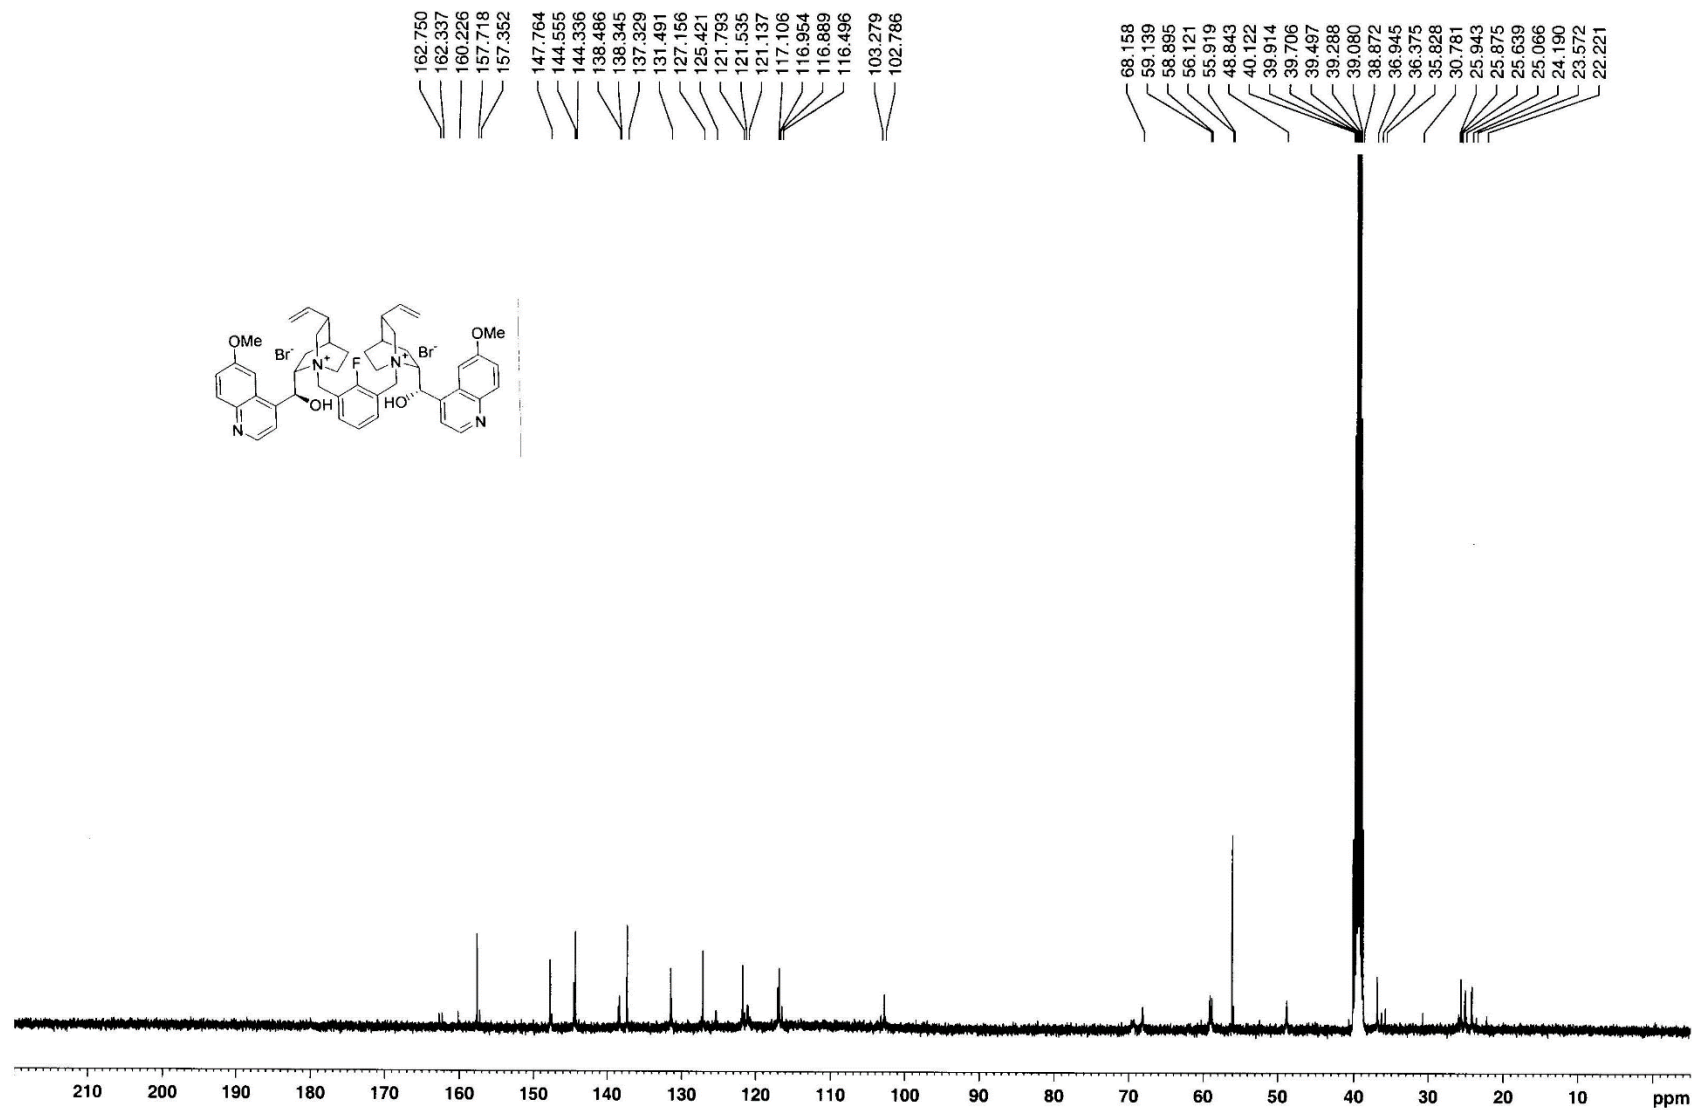

<sup>1</sup>H-NMR of compound 14

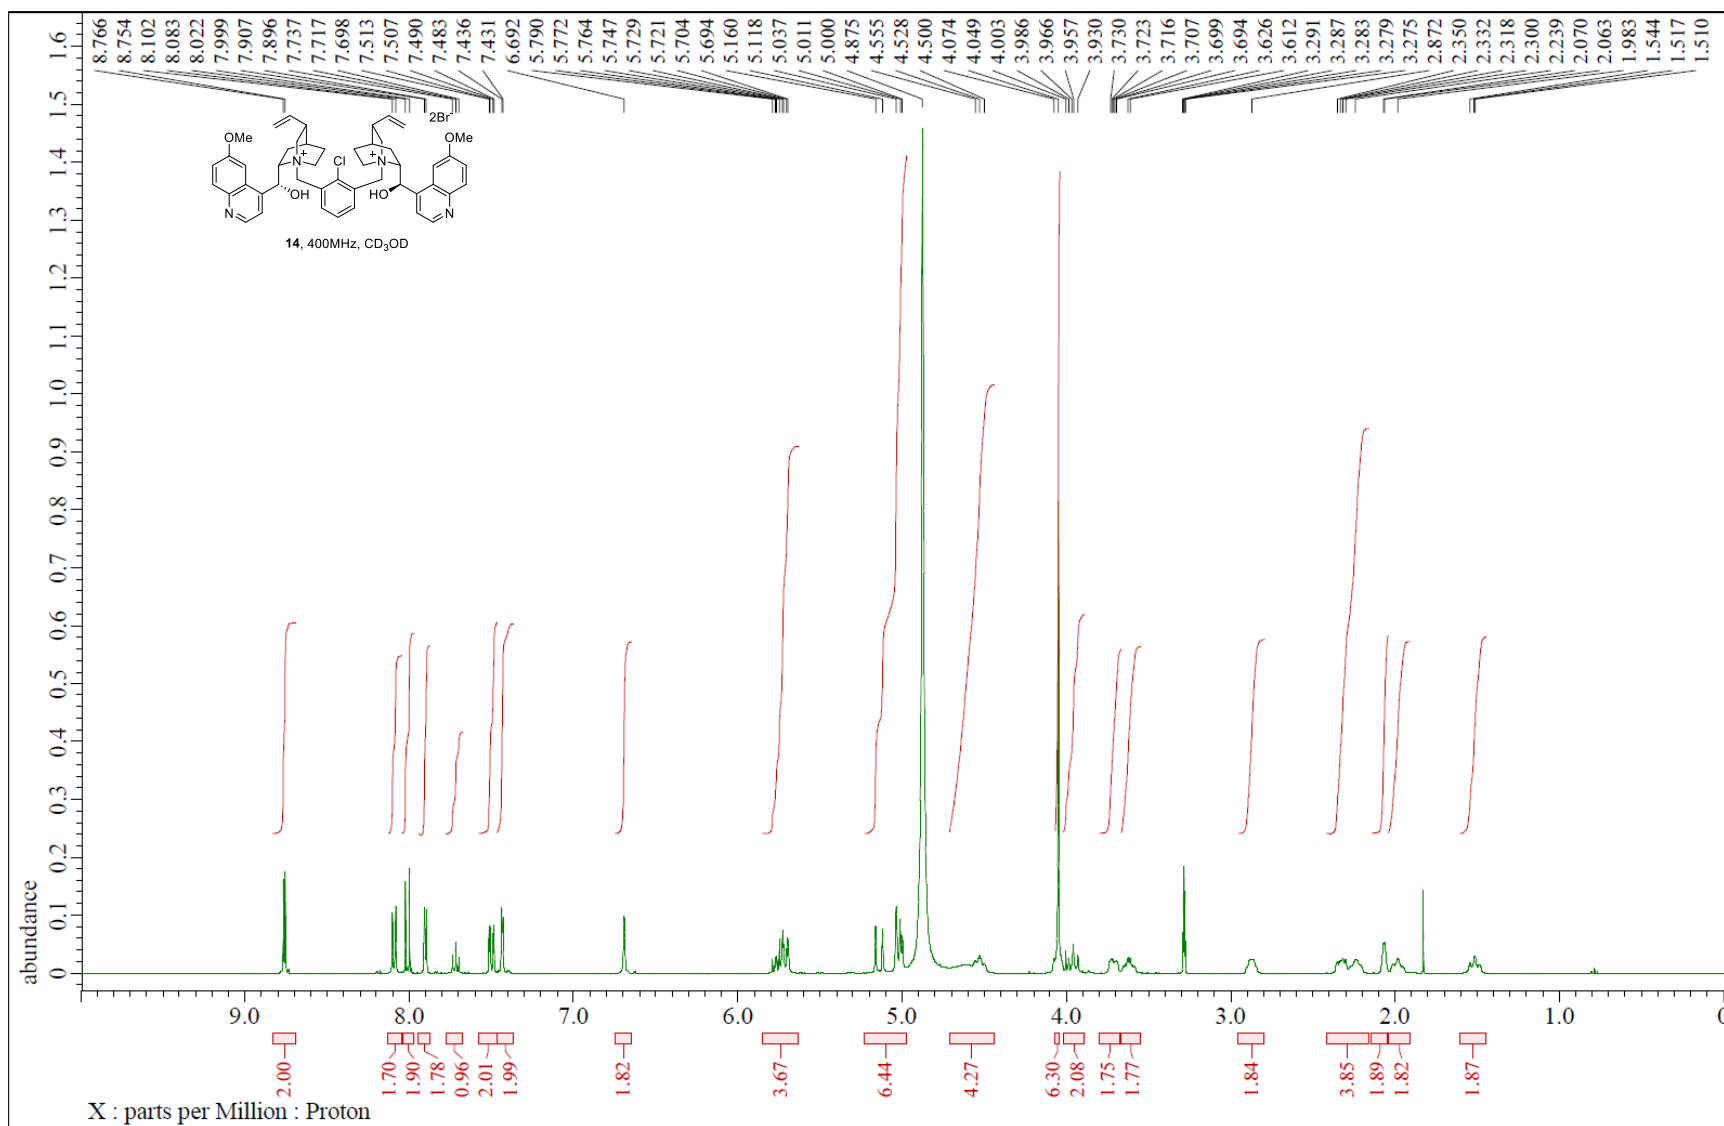

<sup>13</sup>C-NMR of compound **14**

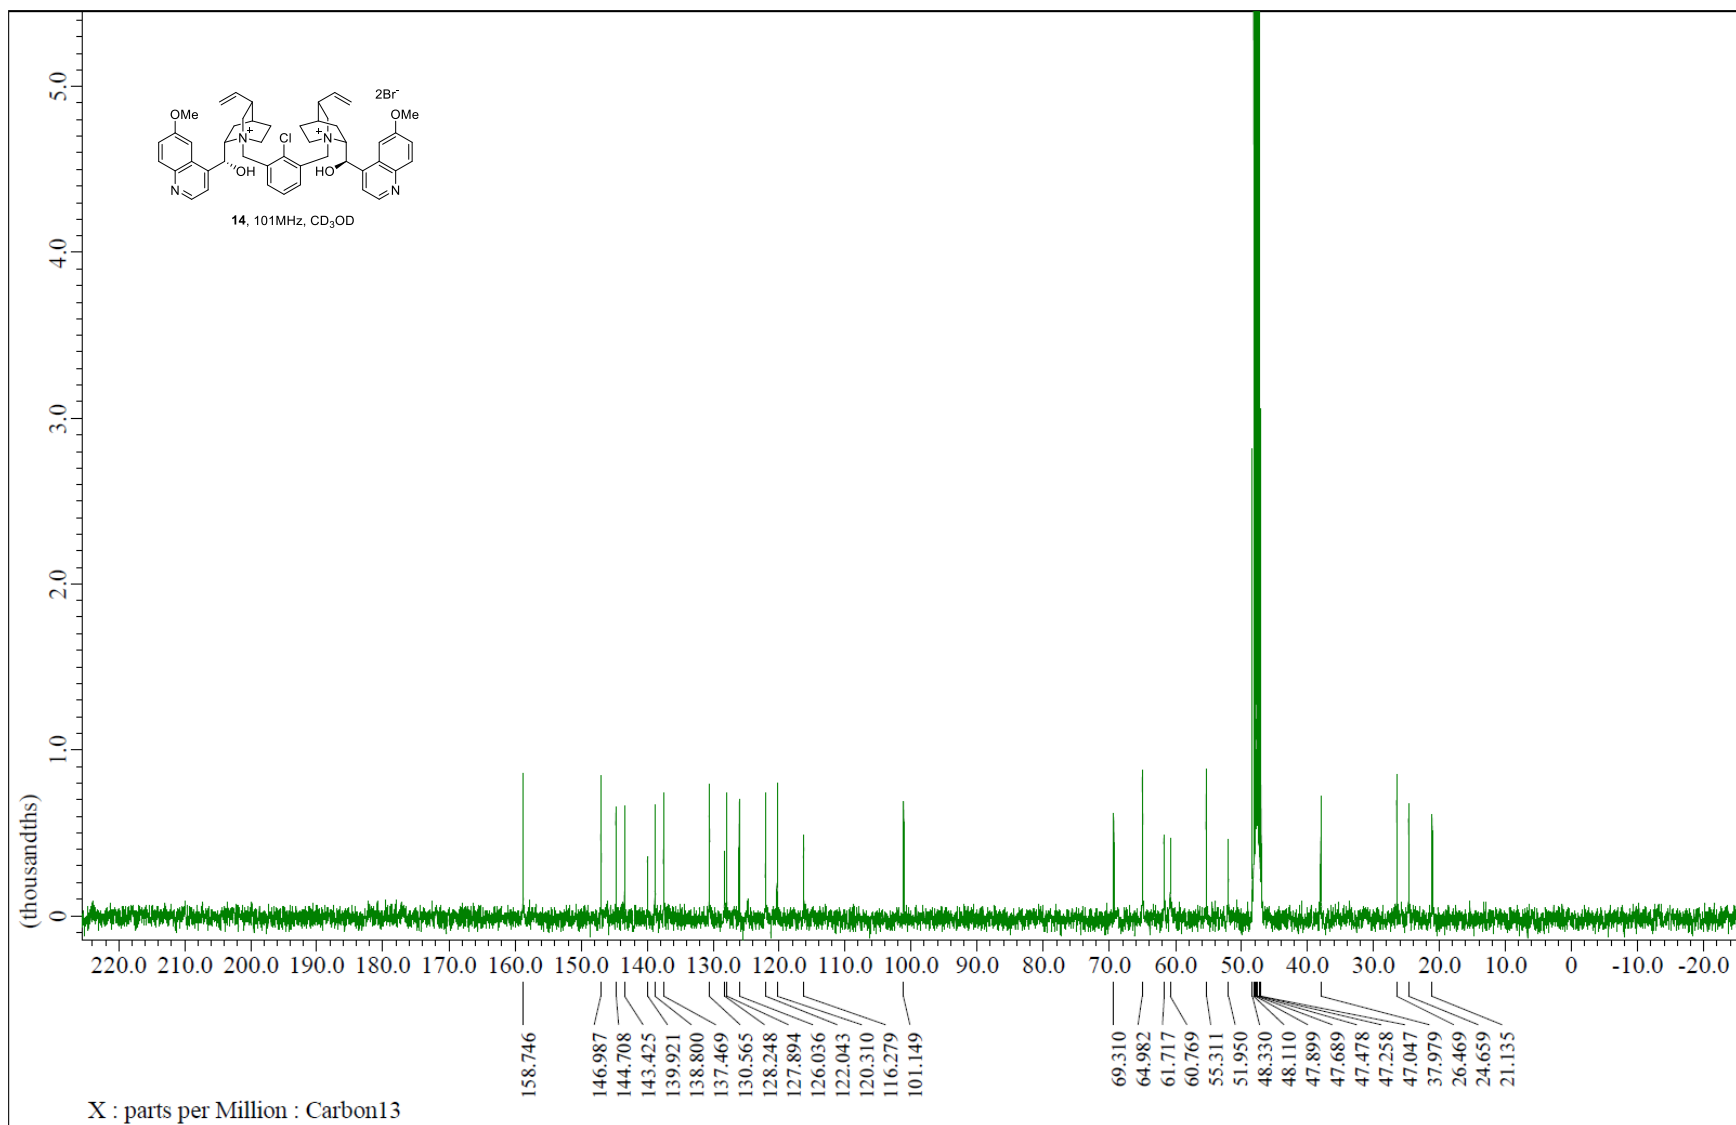

<sup>1</sup>H-NMR of compound 15

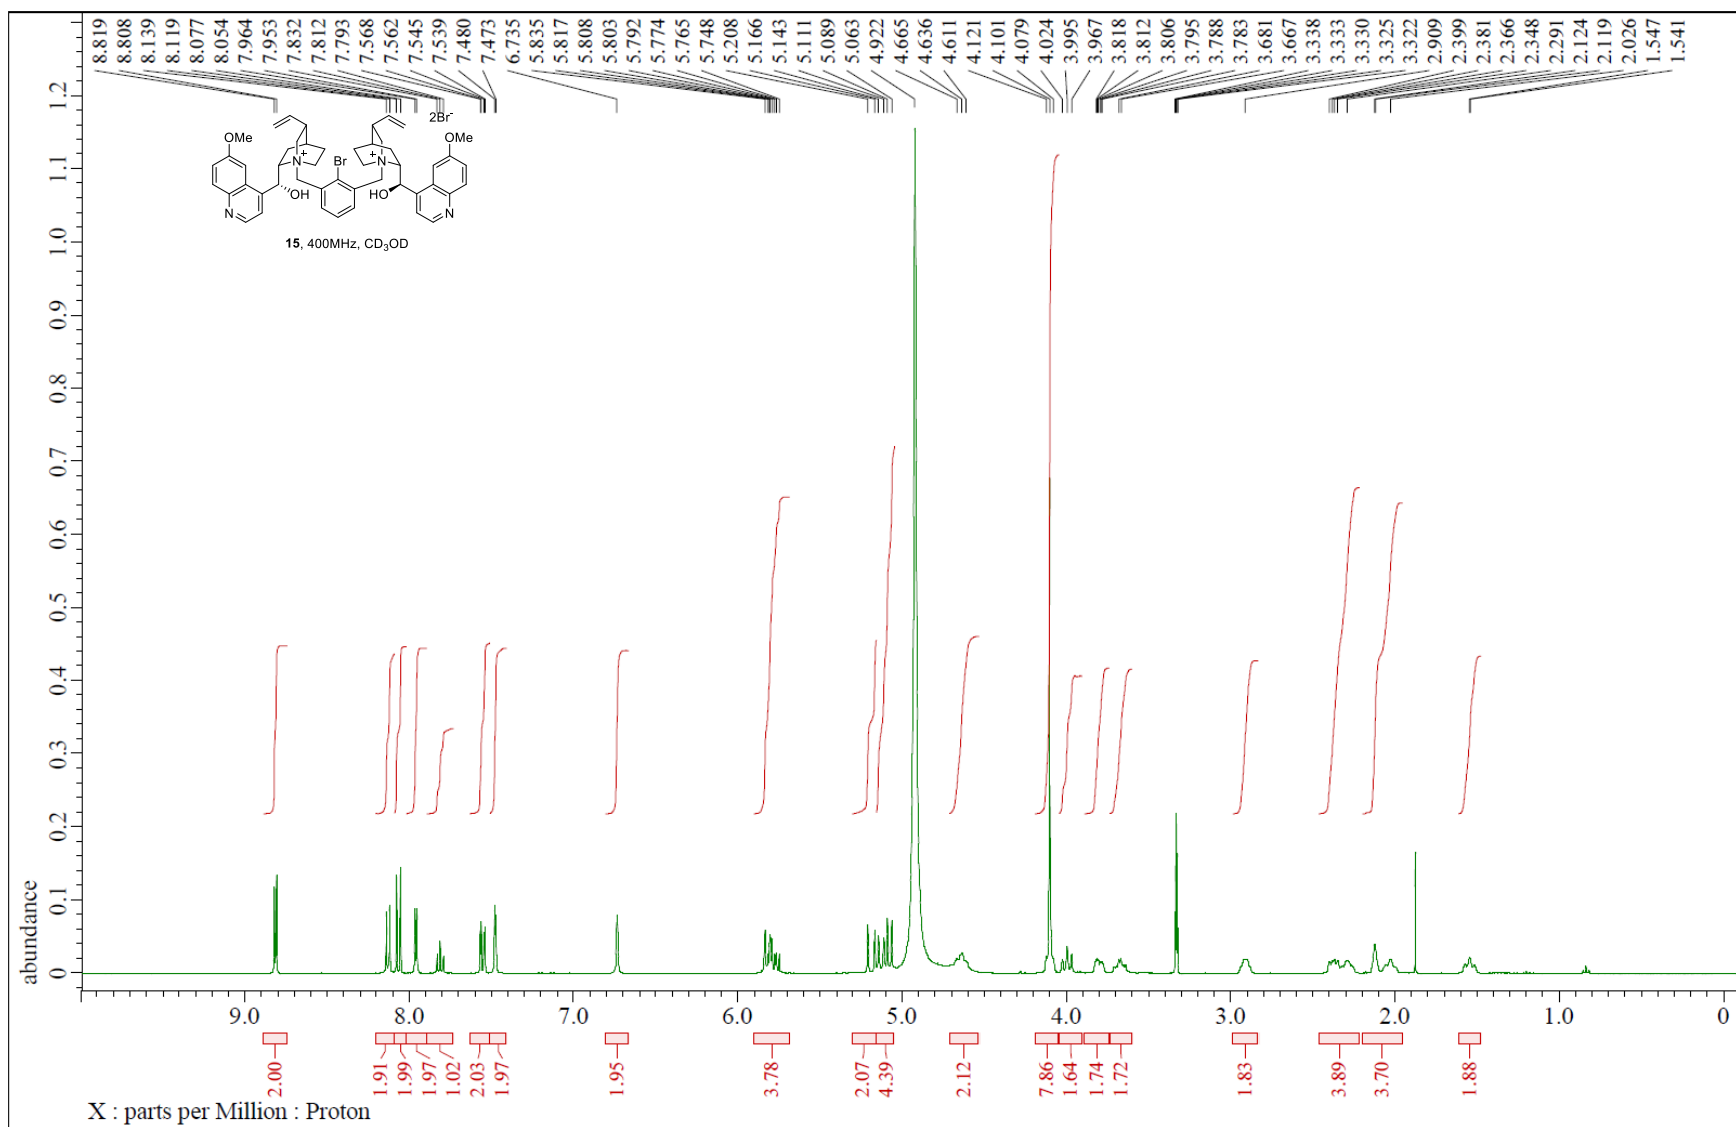

<sup>13</sup>C-NMR of compound **15**

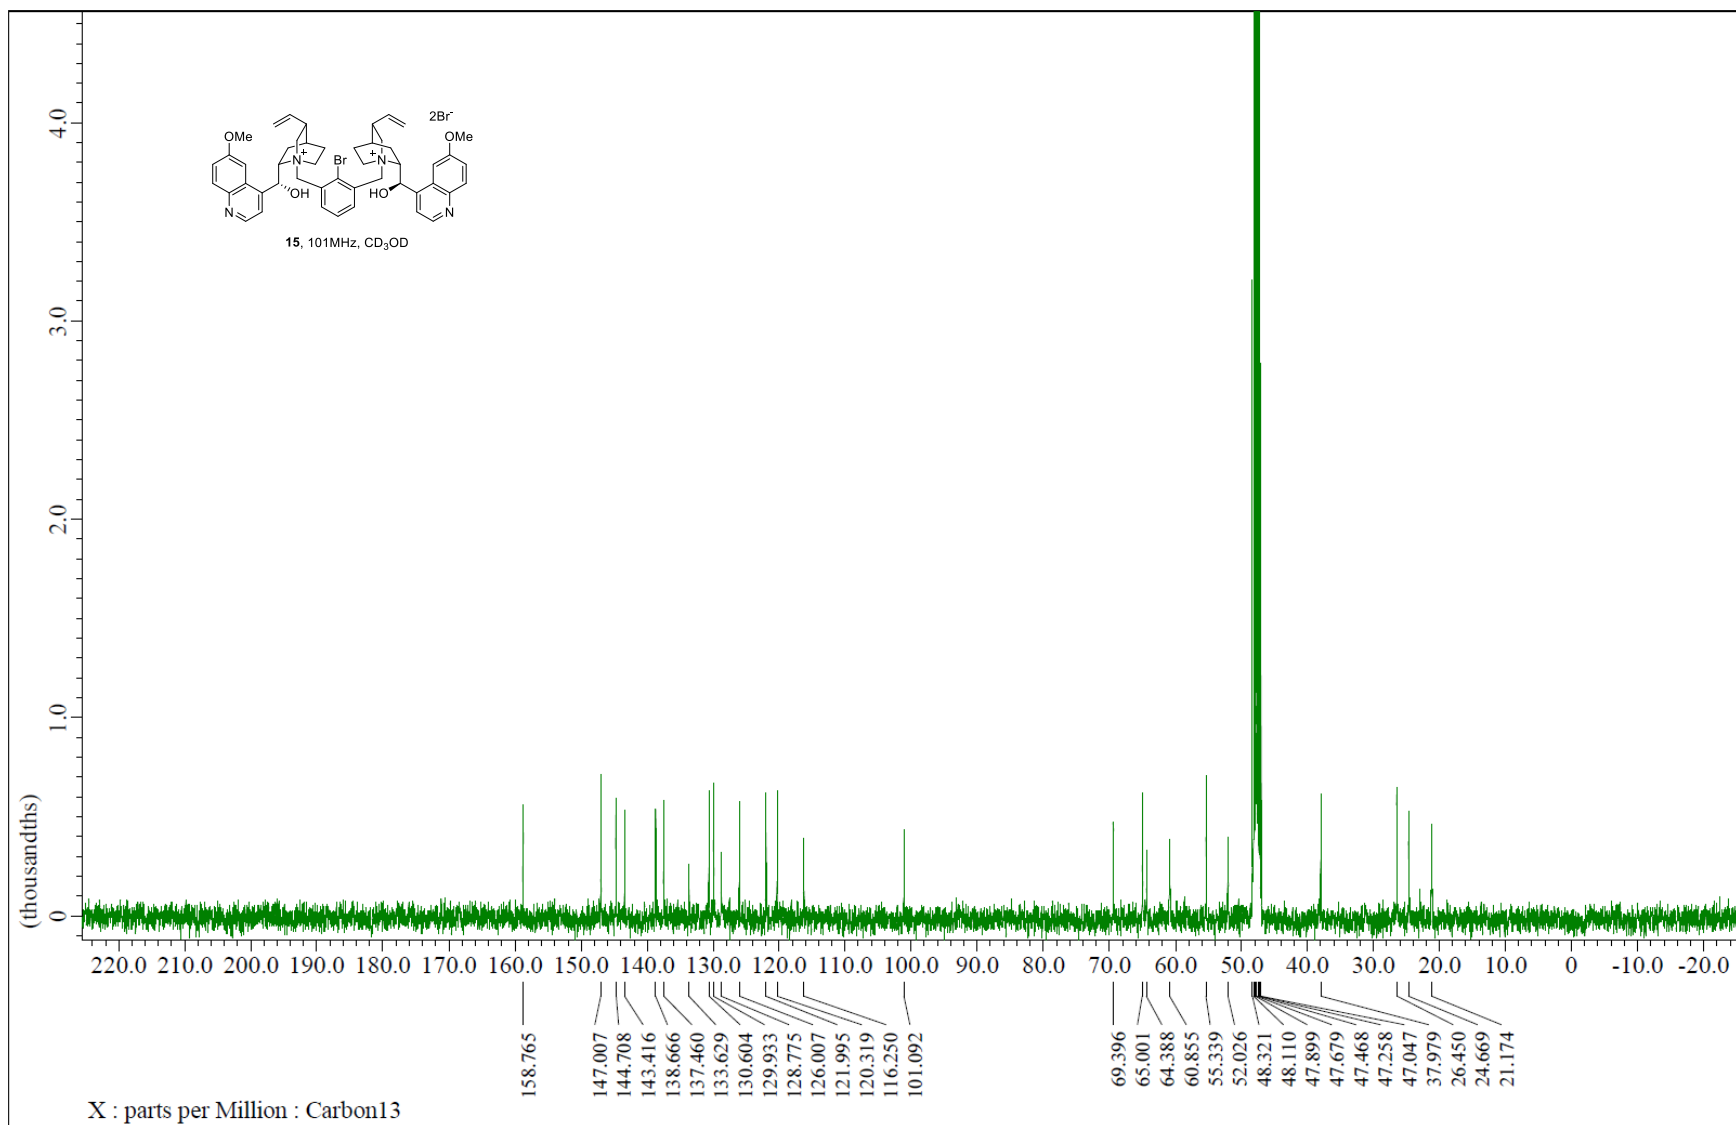

<sup>1</sup>H-NMR of compound **S1**

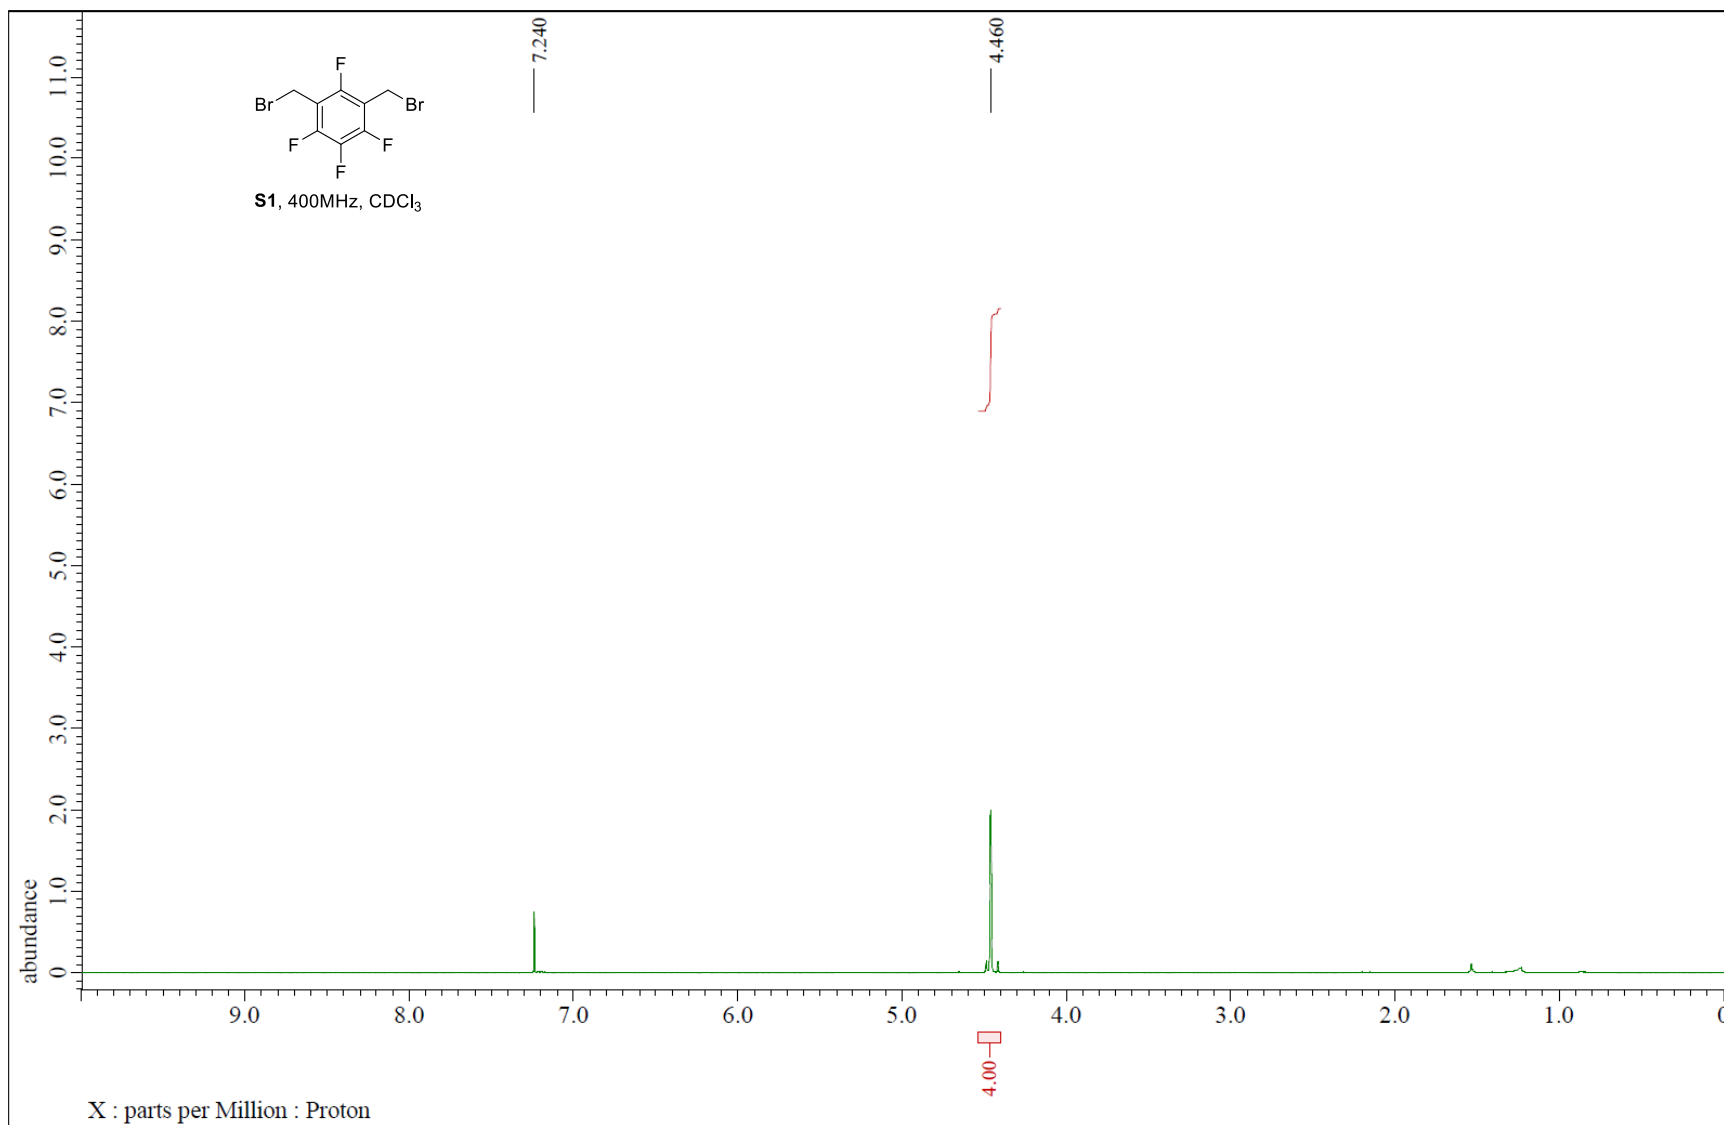



<sup>13</sup>C-NMR of compound **S1**

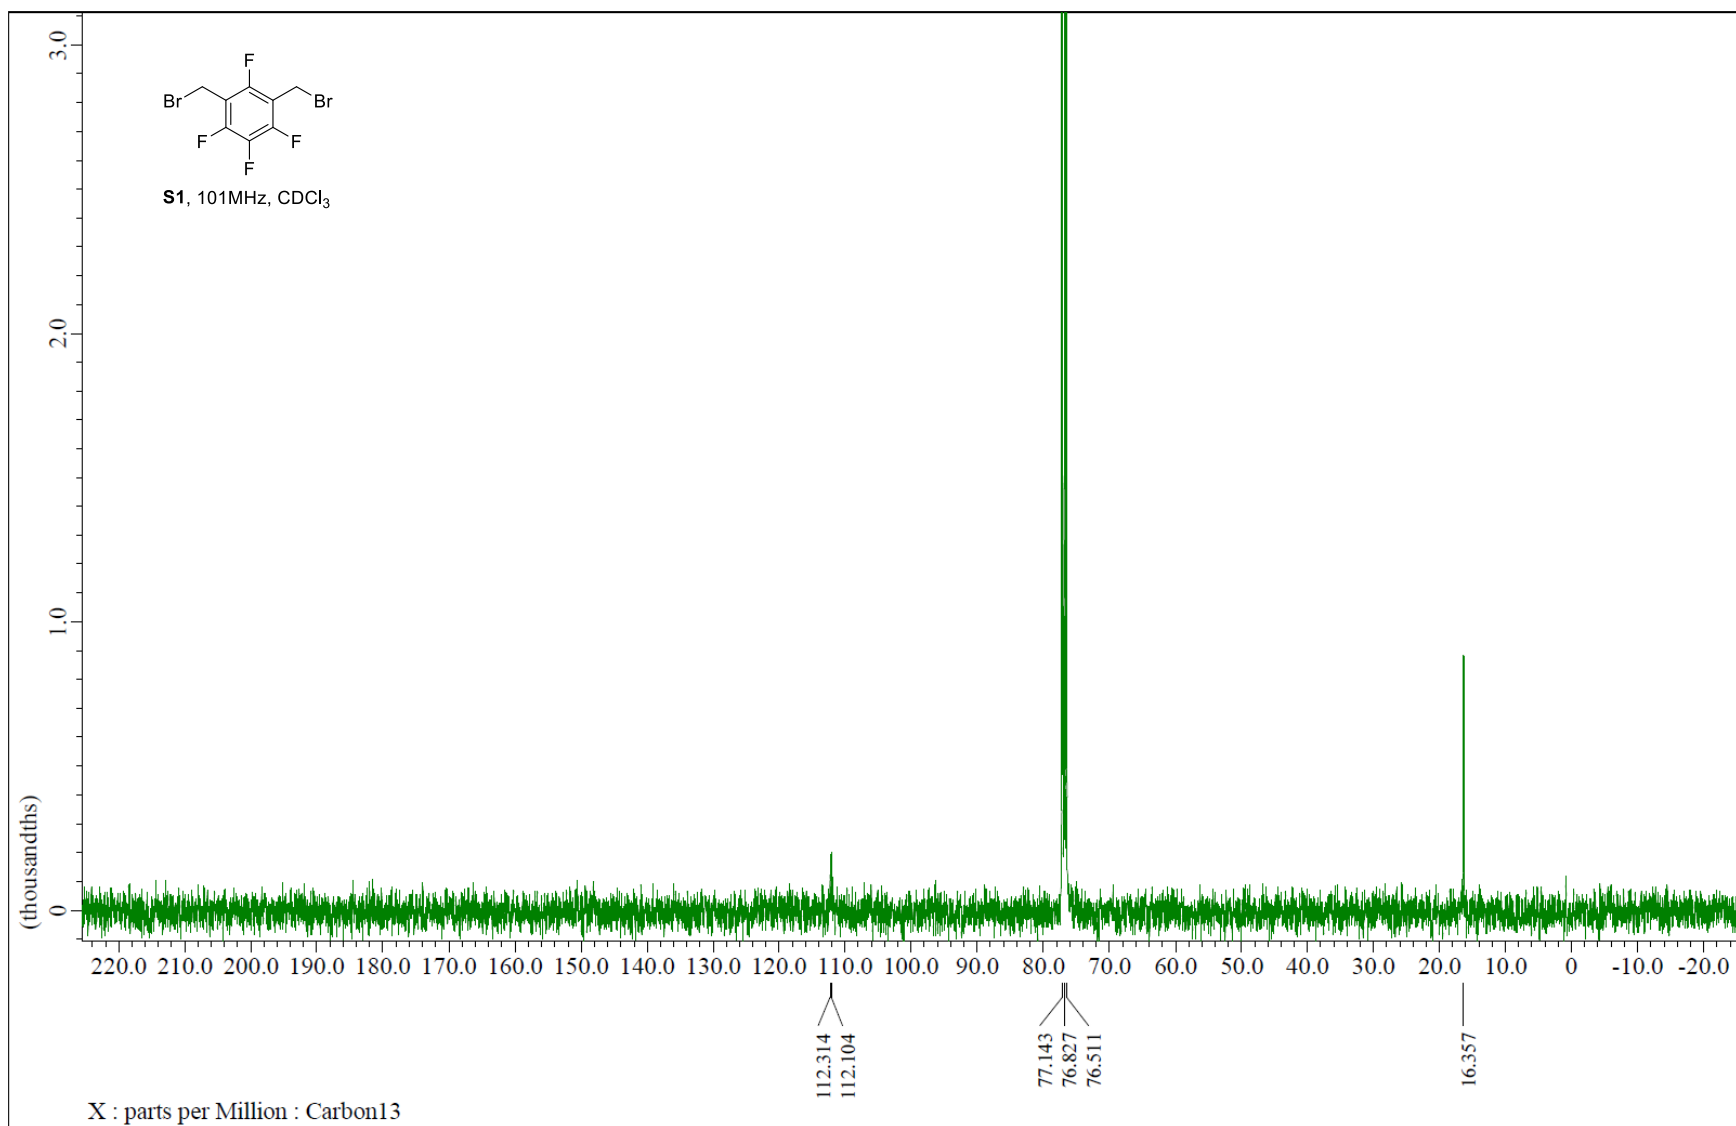

<sup>19</sup>F-NMR of compound S1

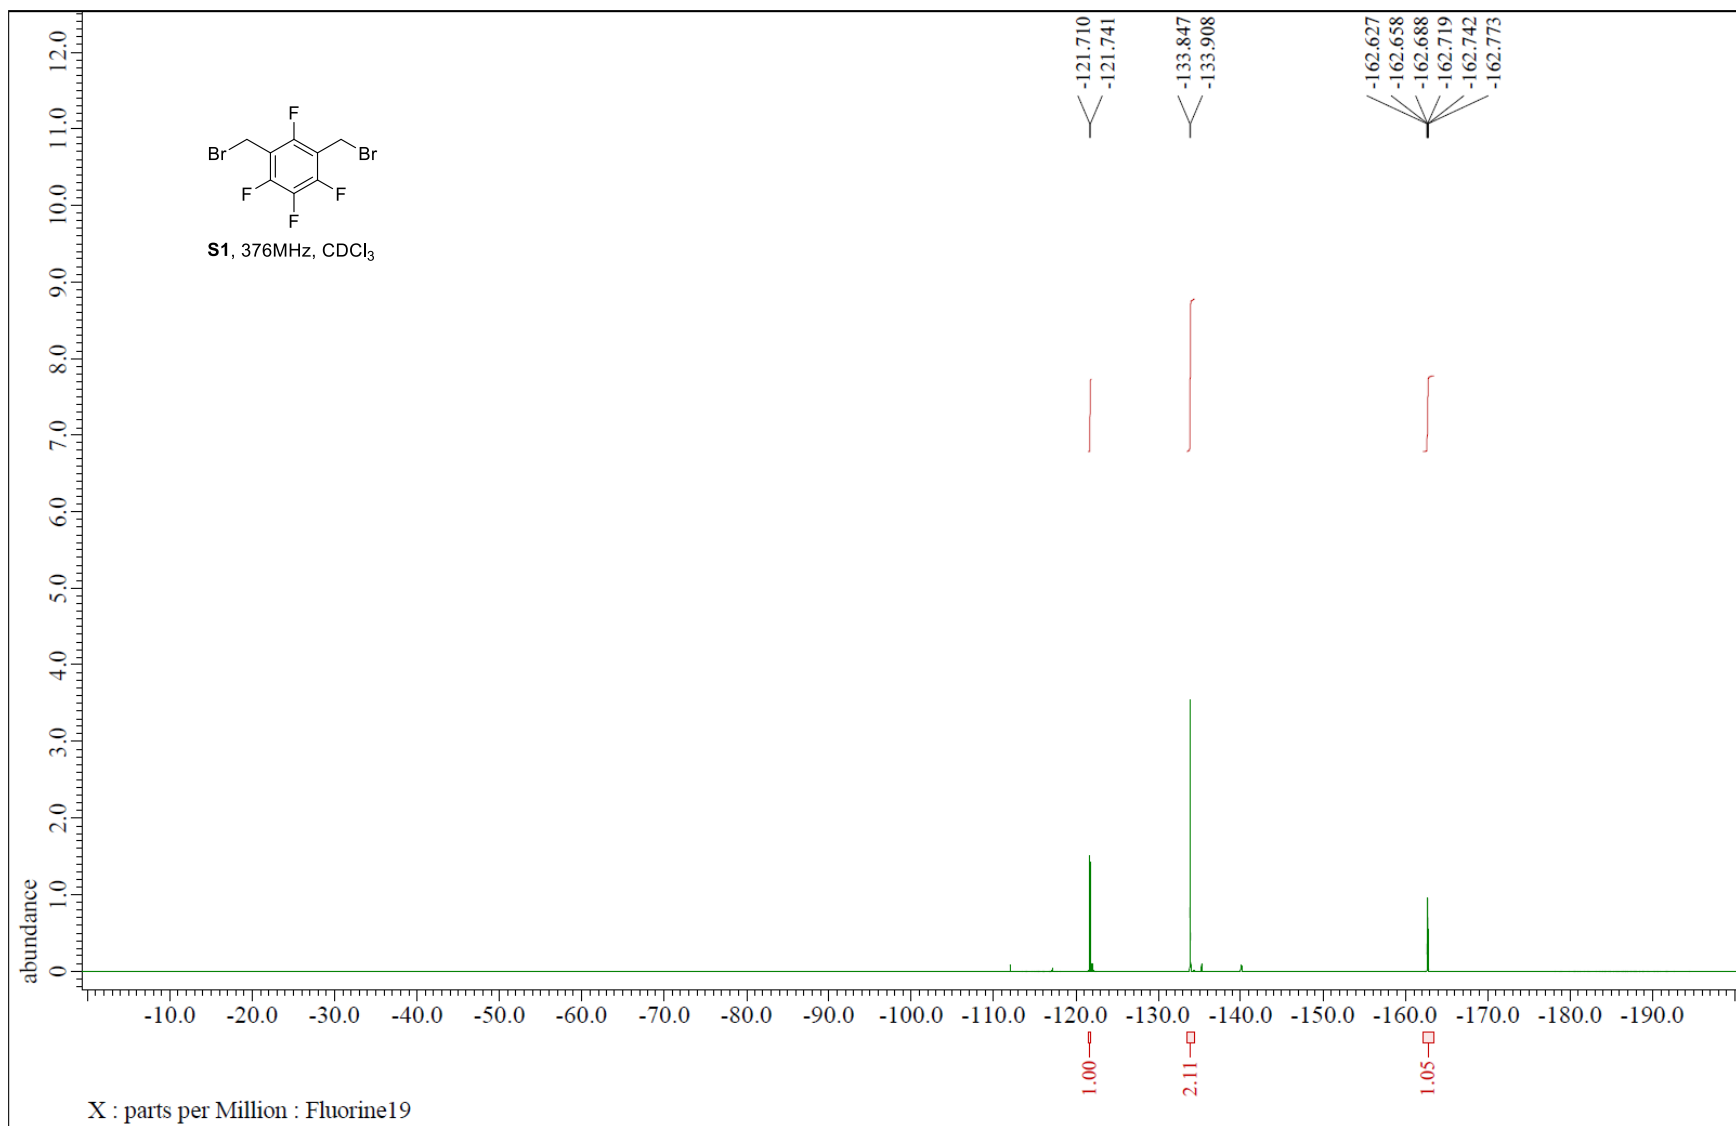

<sup>1</sup>H-NMR of compound 16

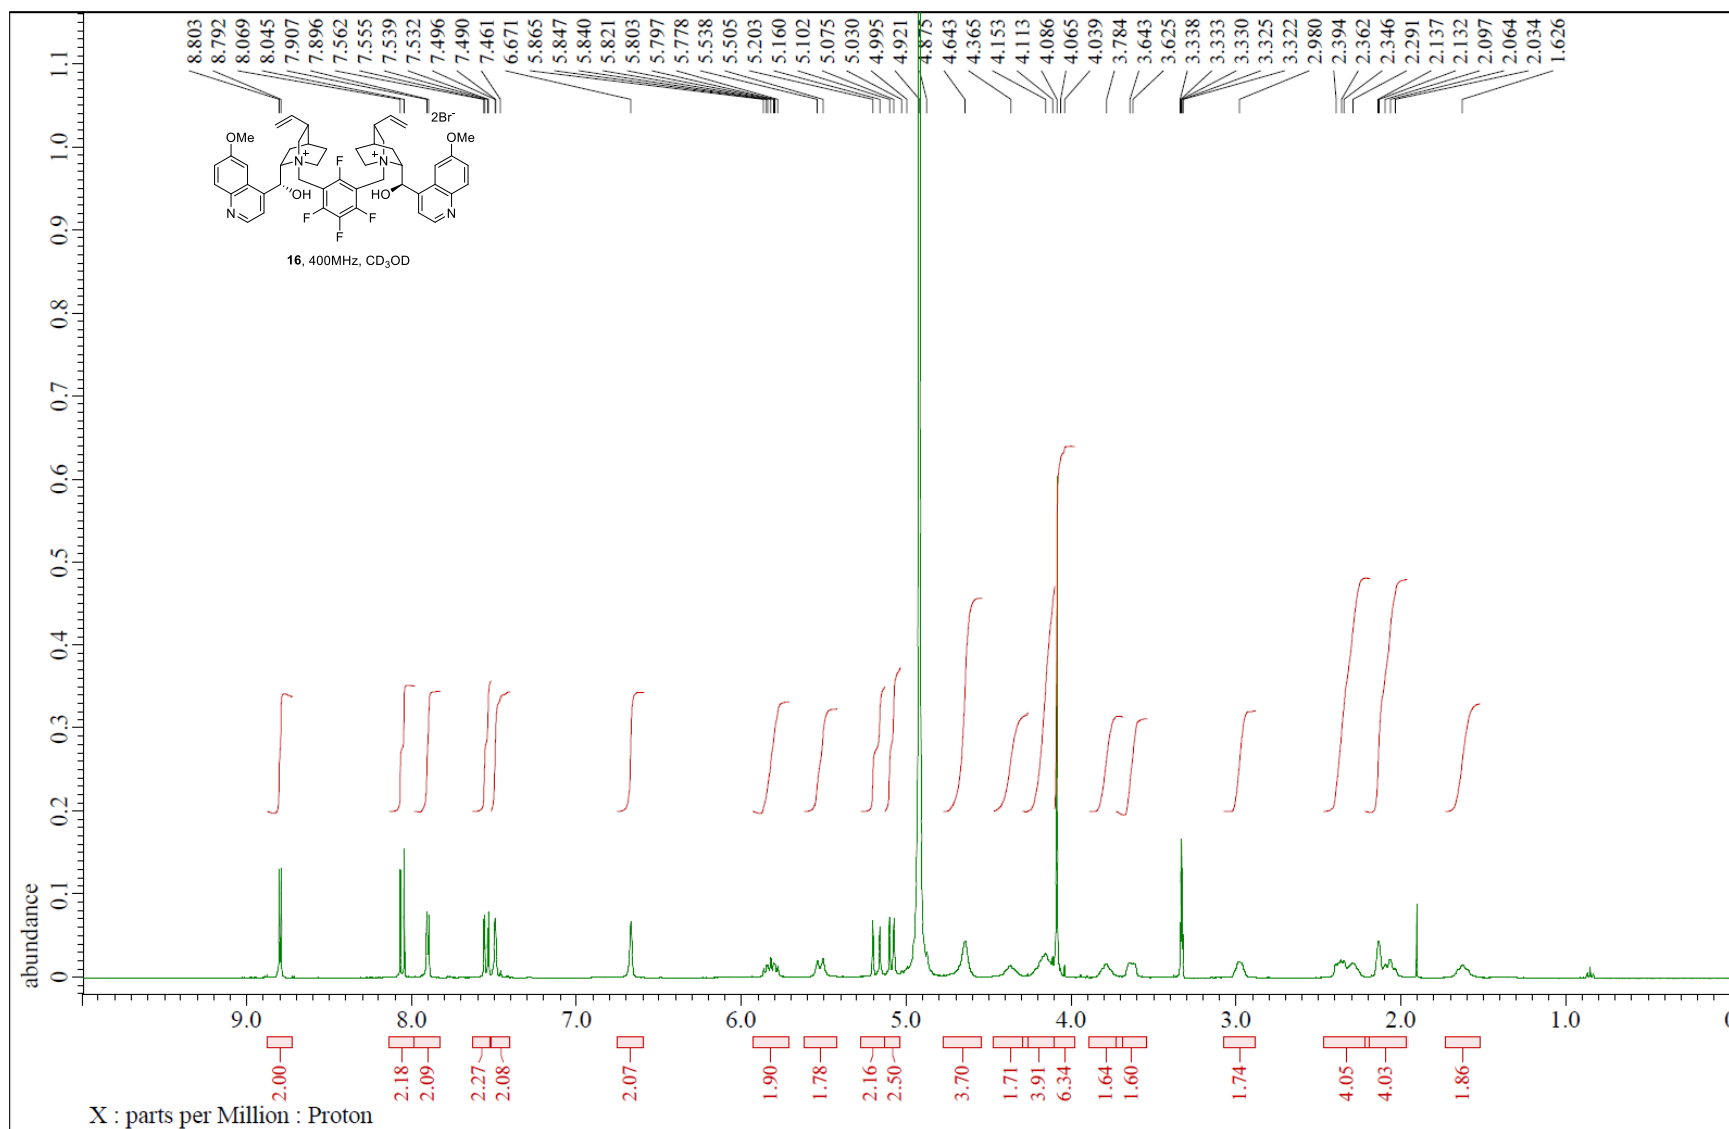

<sup>1</sup>H-NMR of compound 16

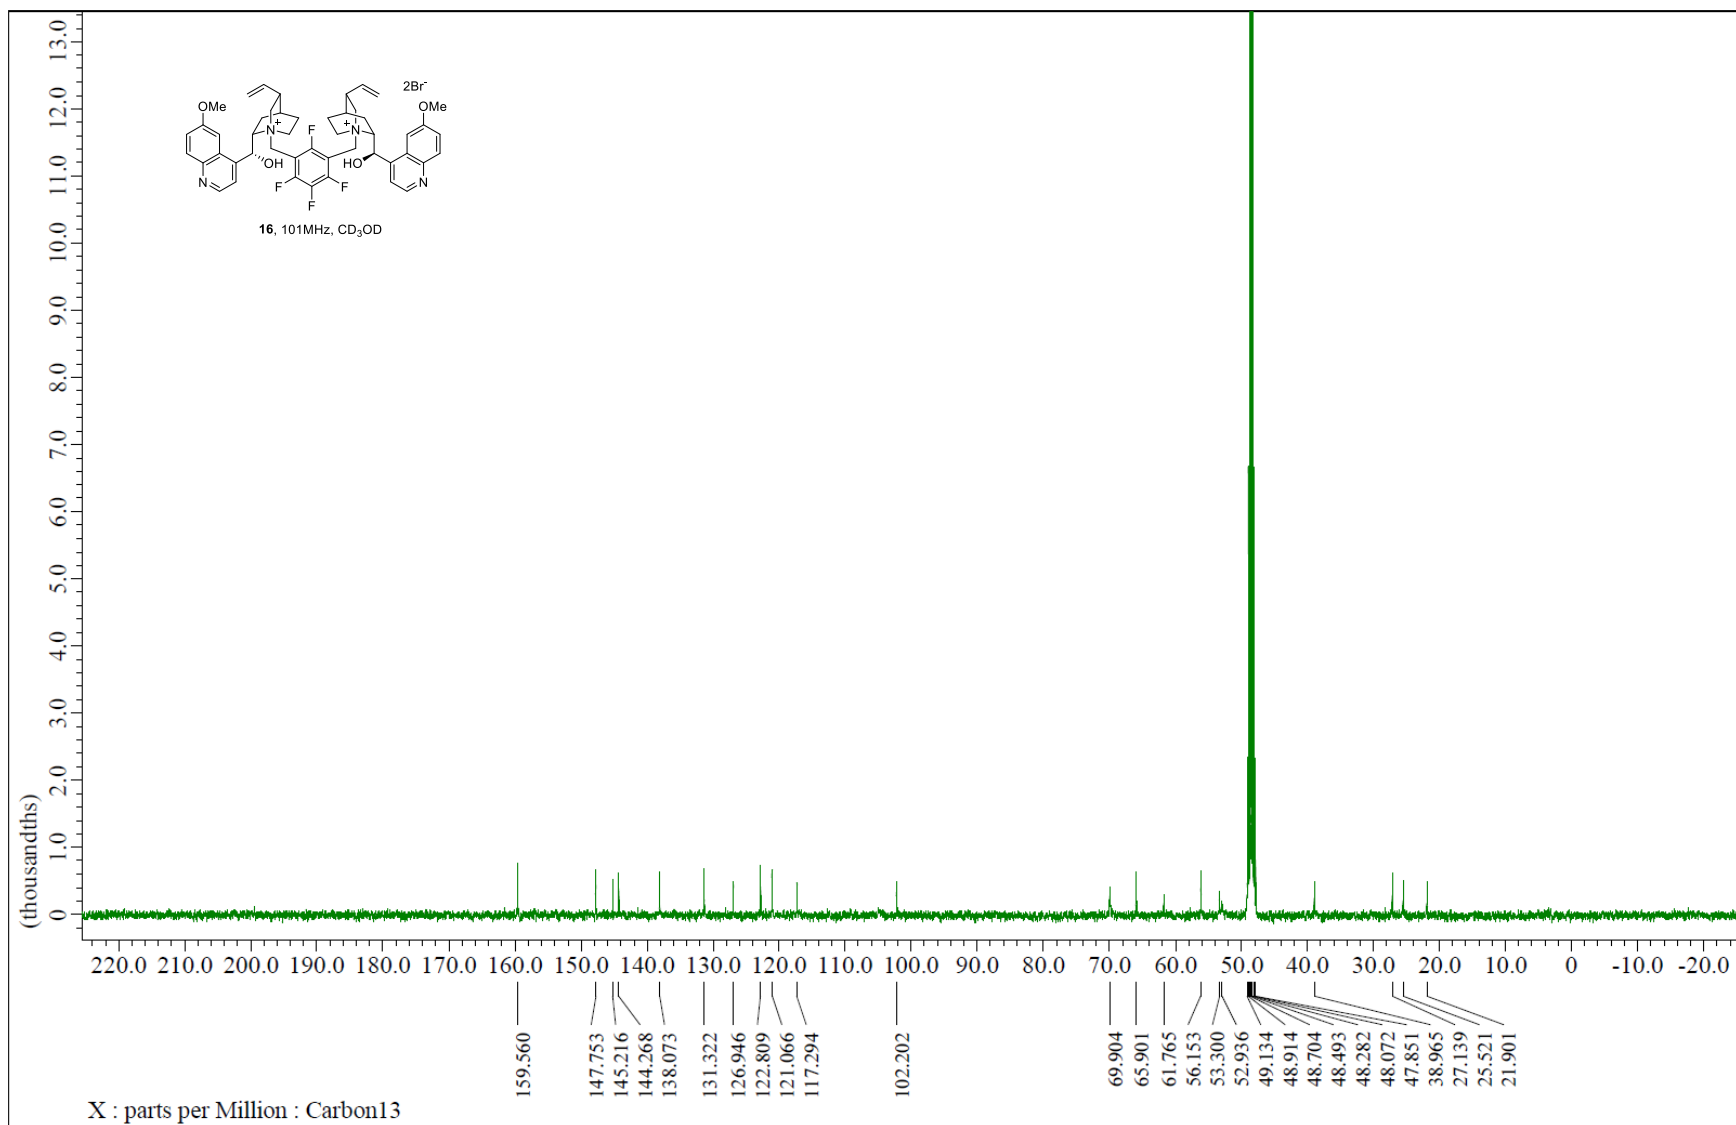

<sup>1</sup>H-NMR of compound 17

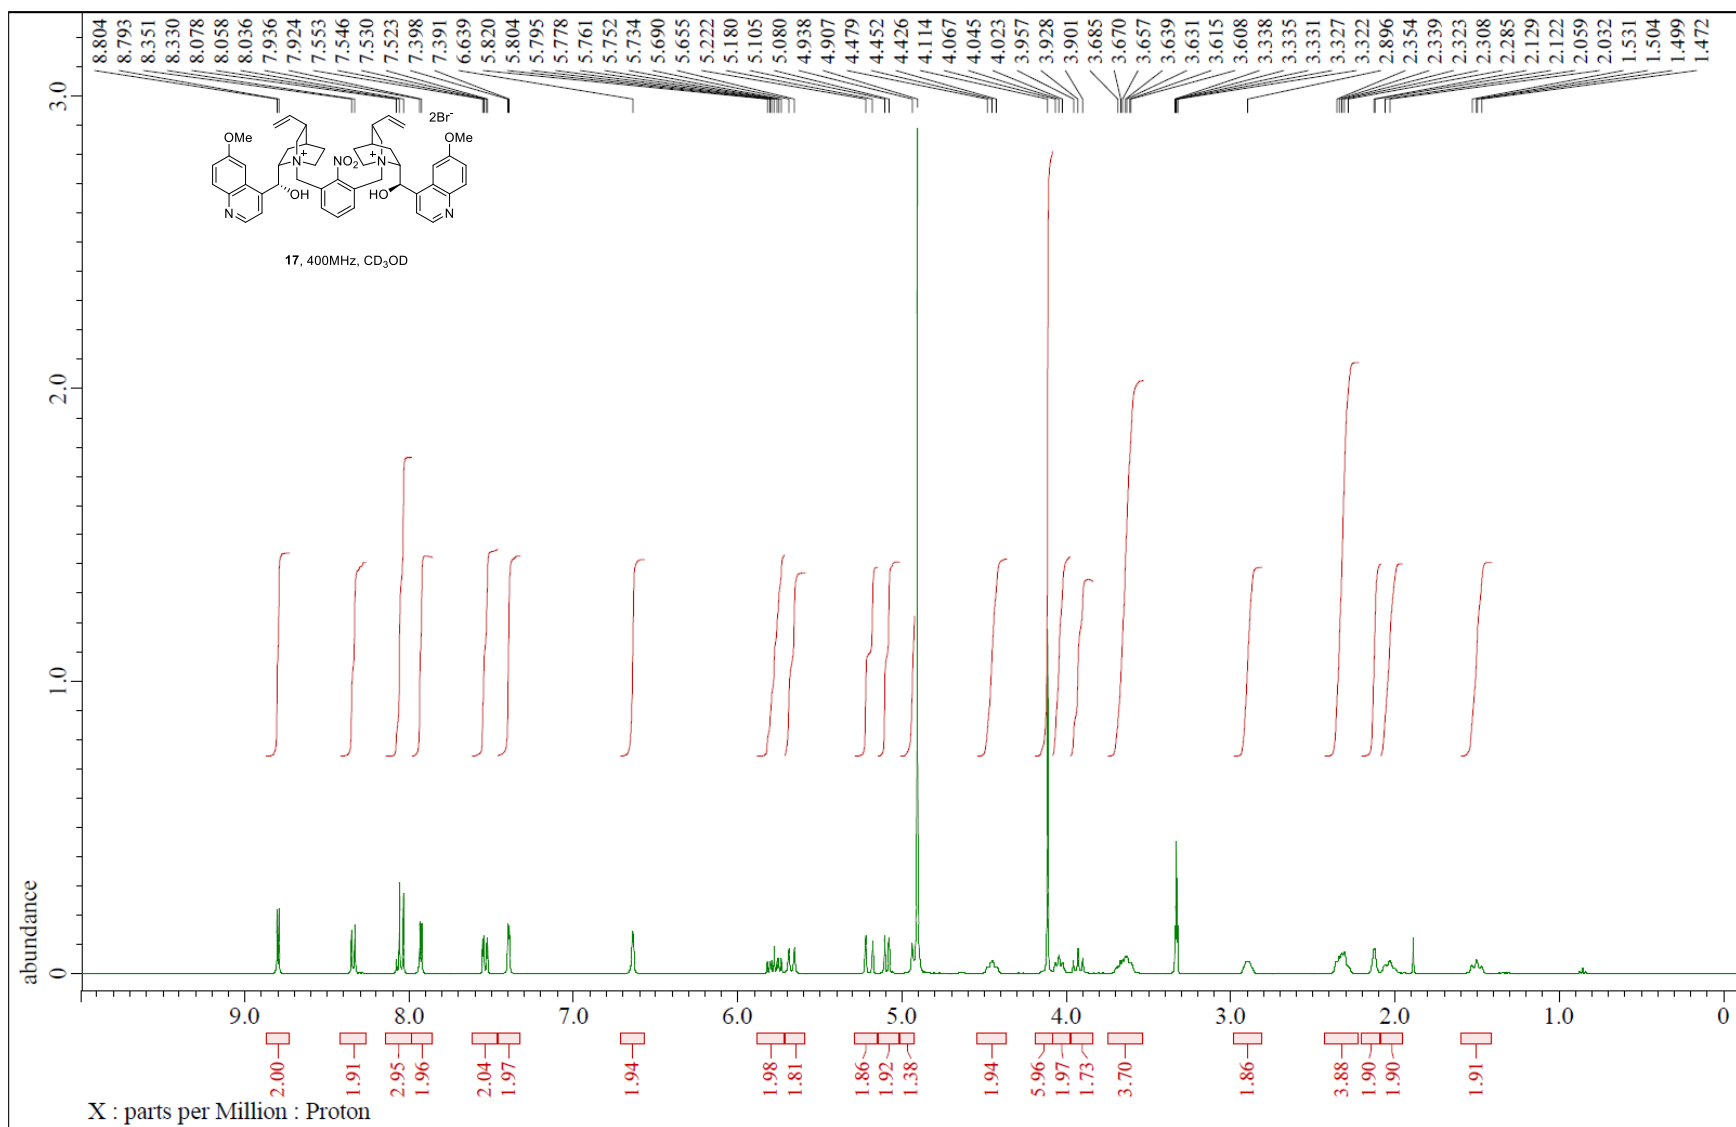

<sup>13</sup>C-NMR of compound **17**

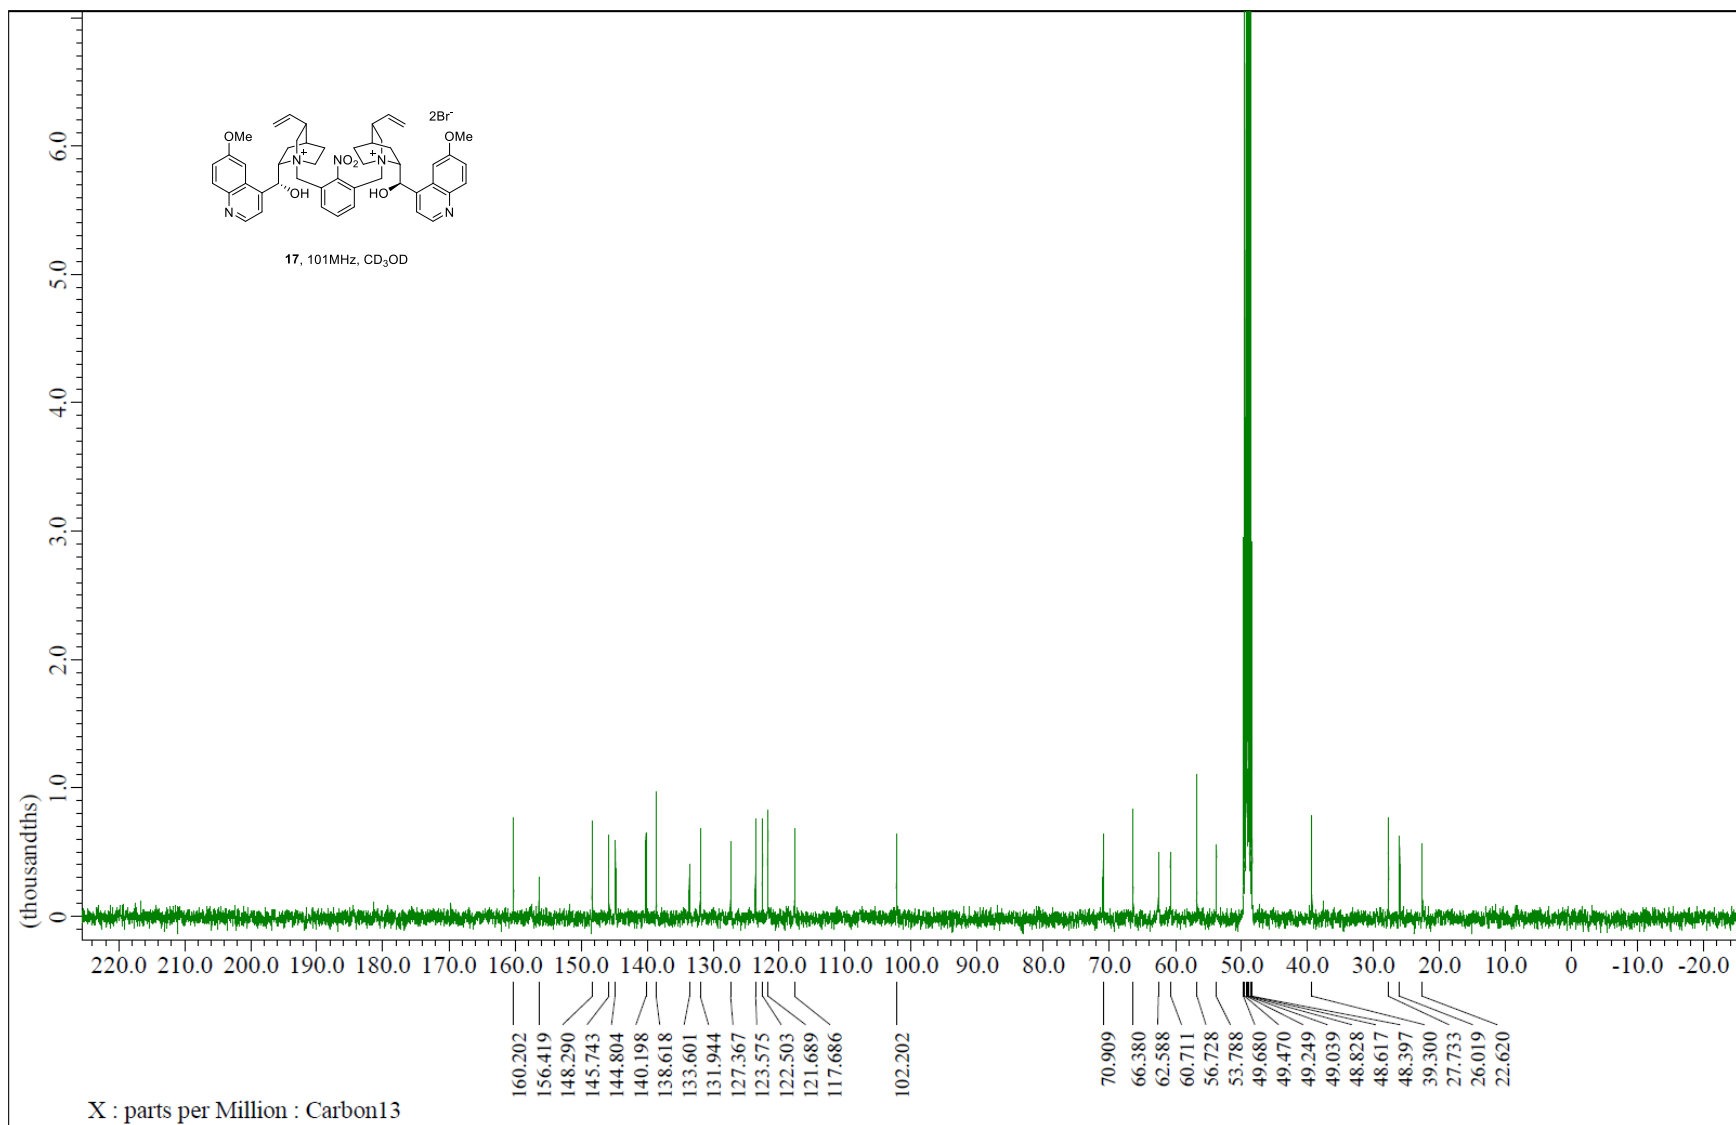

<sup>1</sup>H-NMR of compound 18

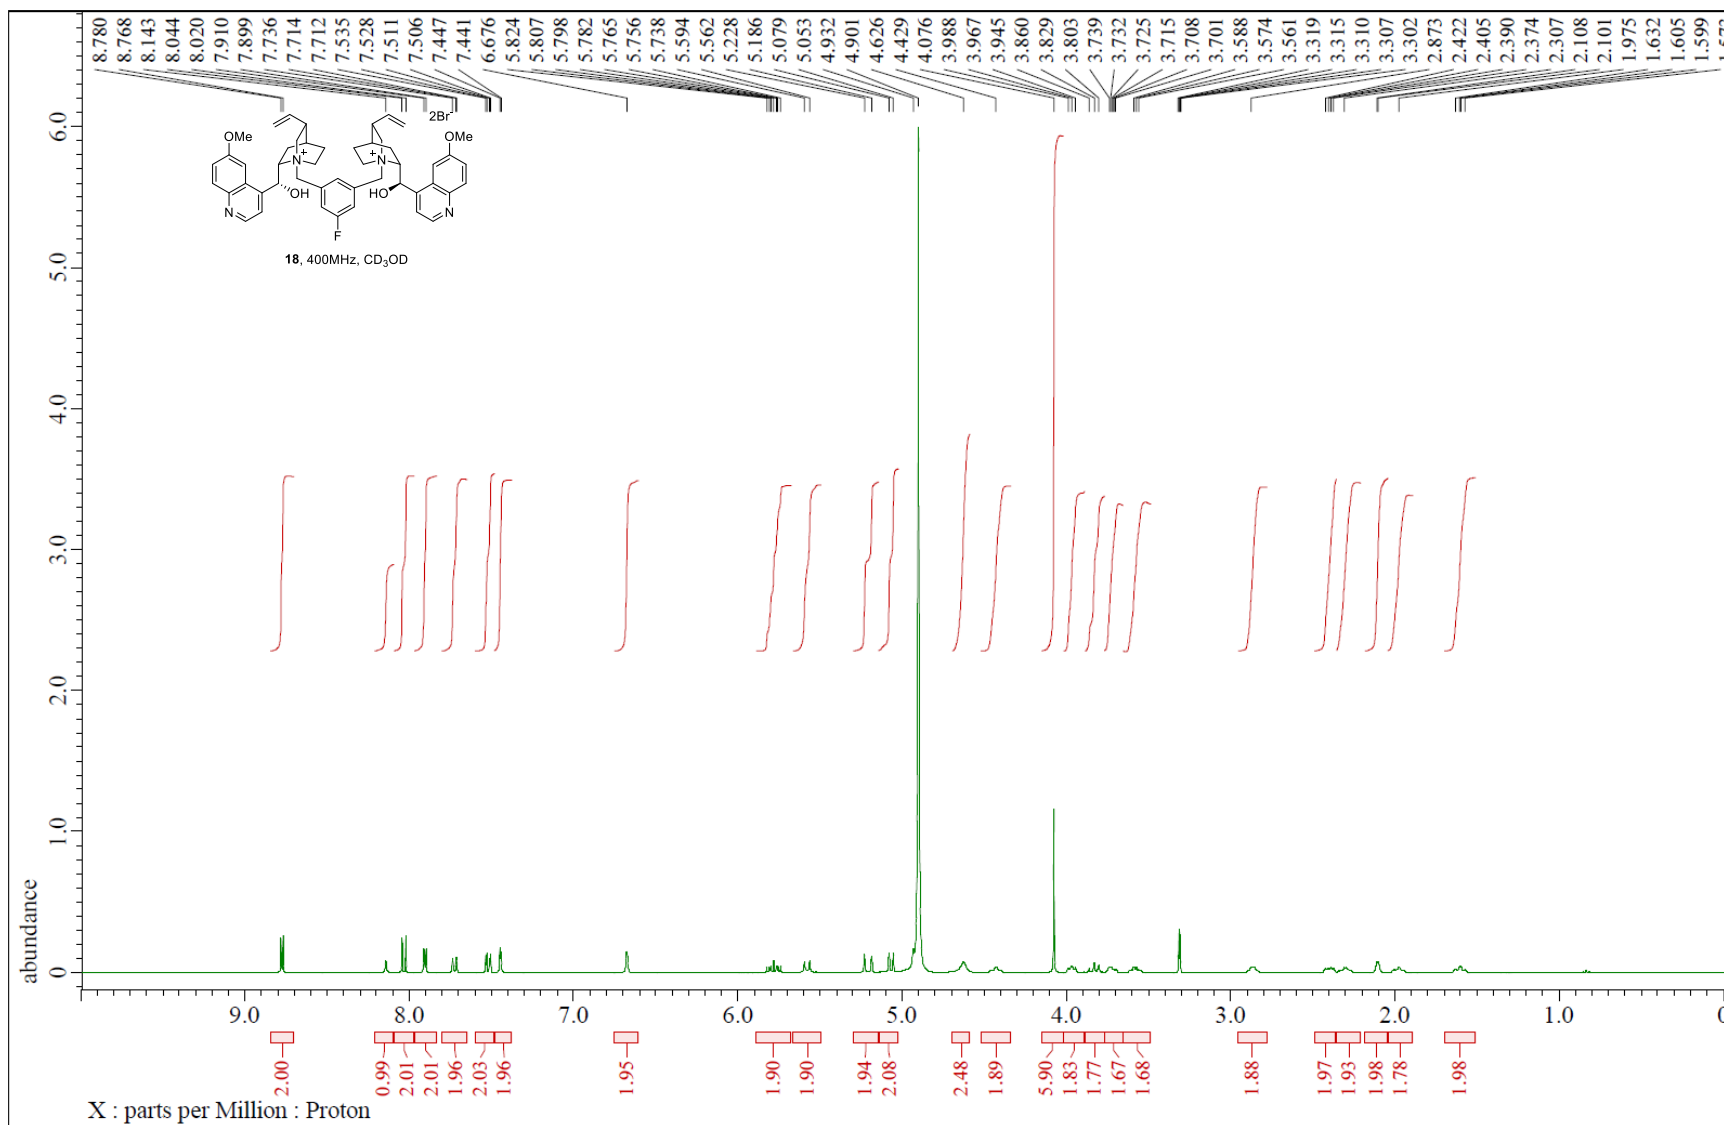

<sup>13</sup>C-NMR of compound **18**

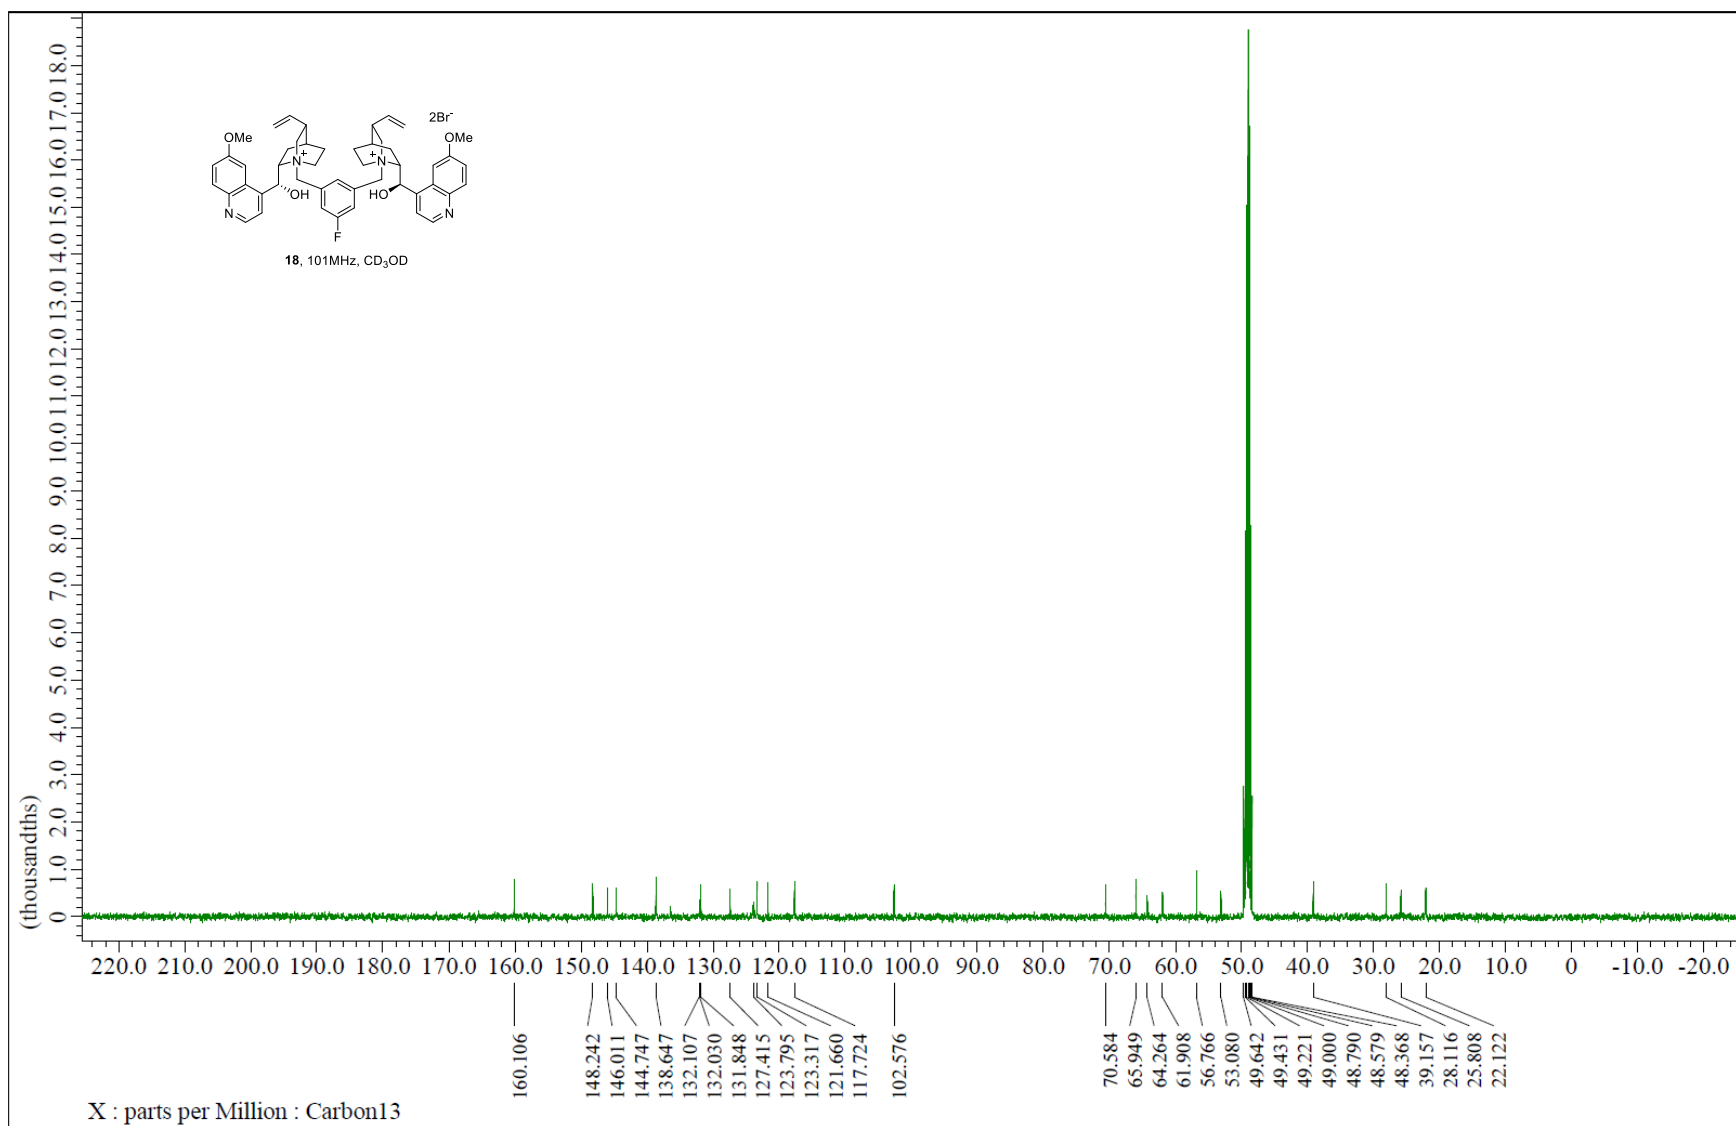



<sup>1</sup>H-NMR of compound 19

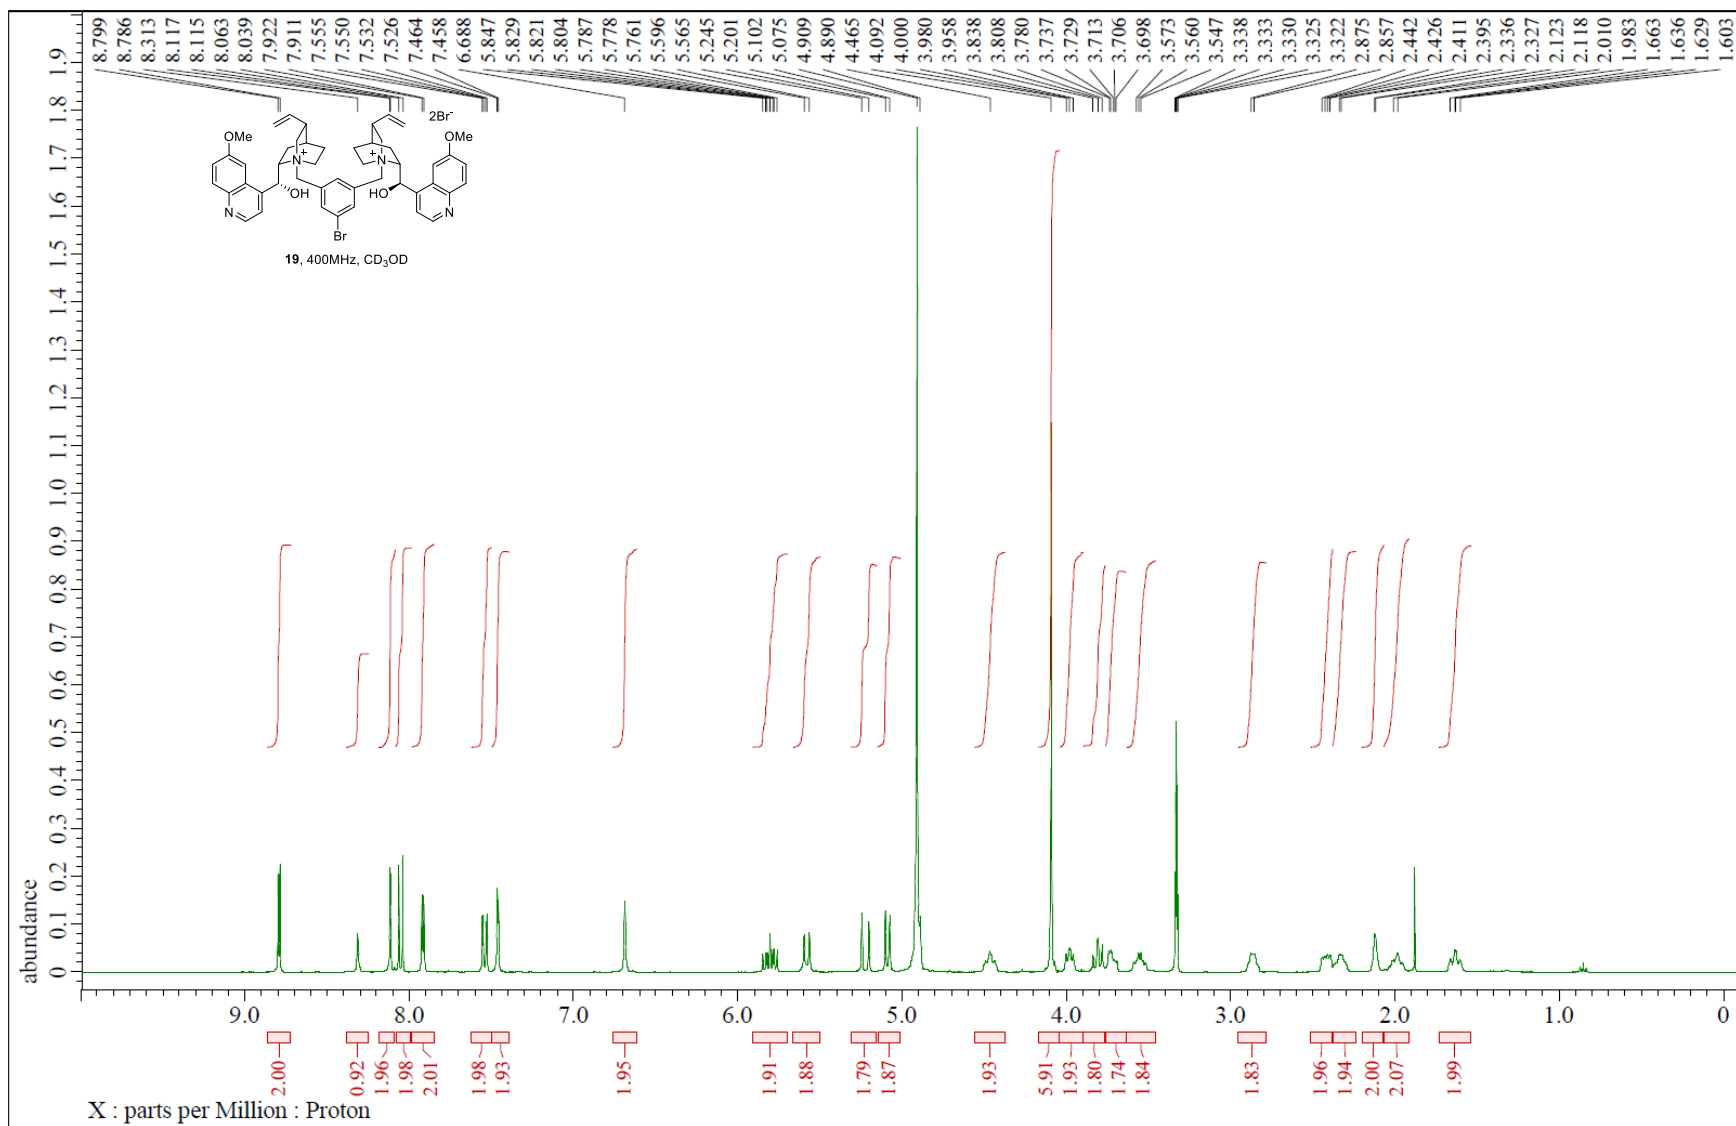

<sup>13</sup>C-NMR of compound **19**

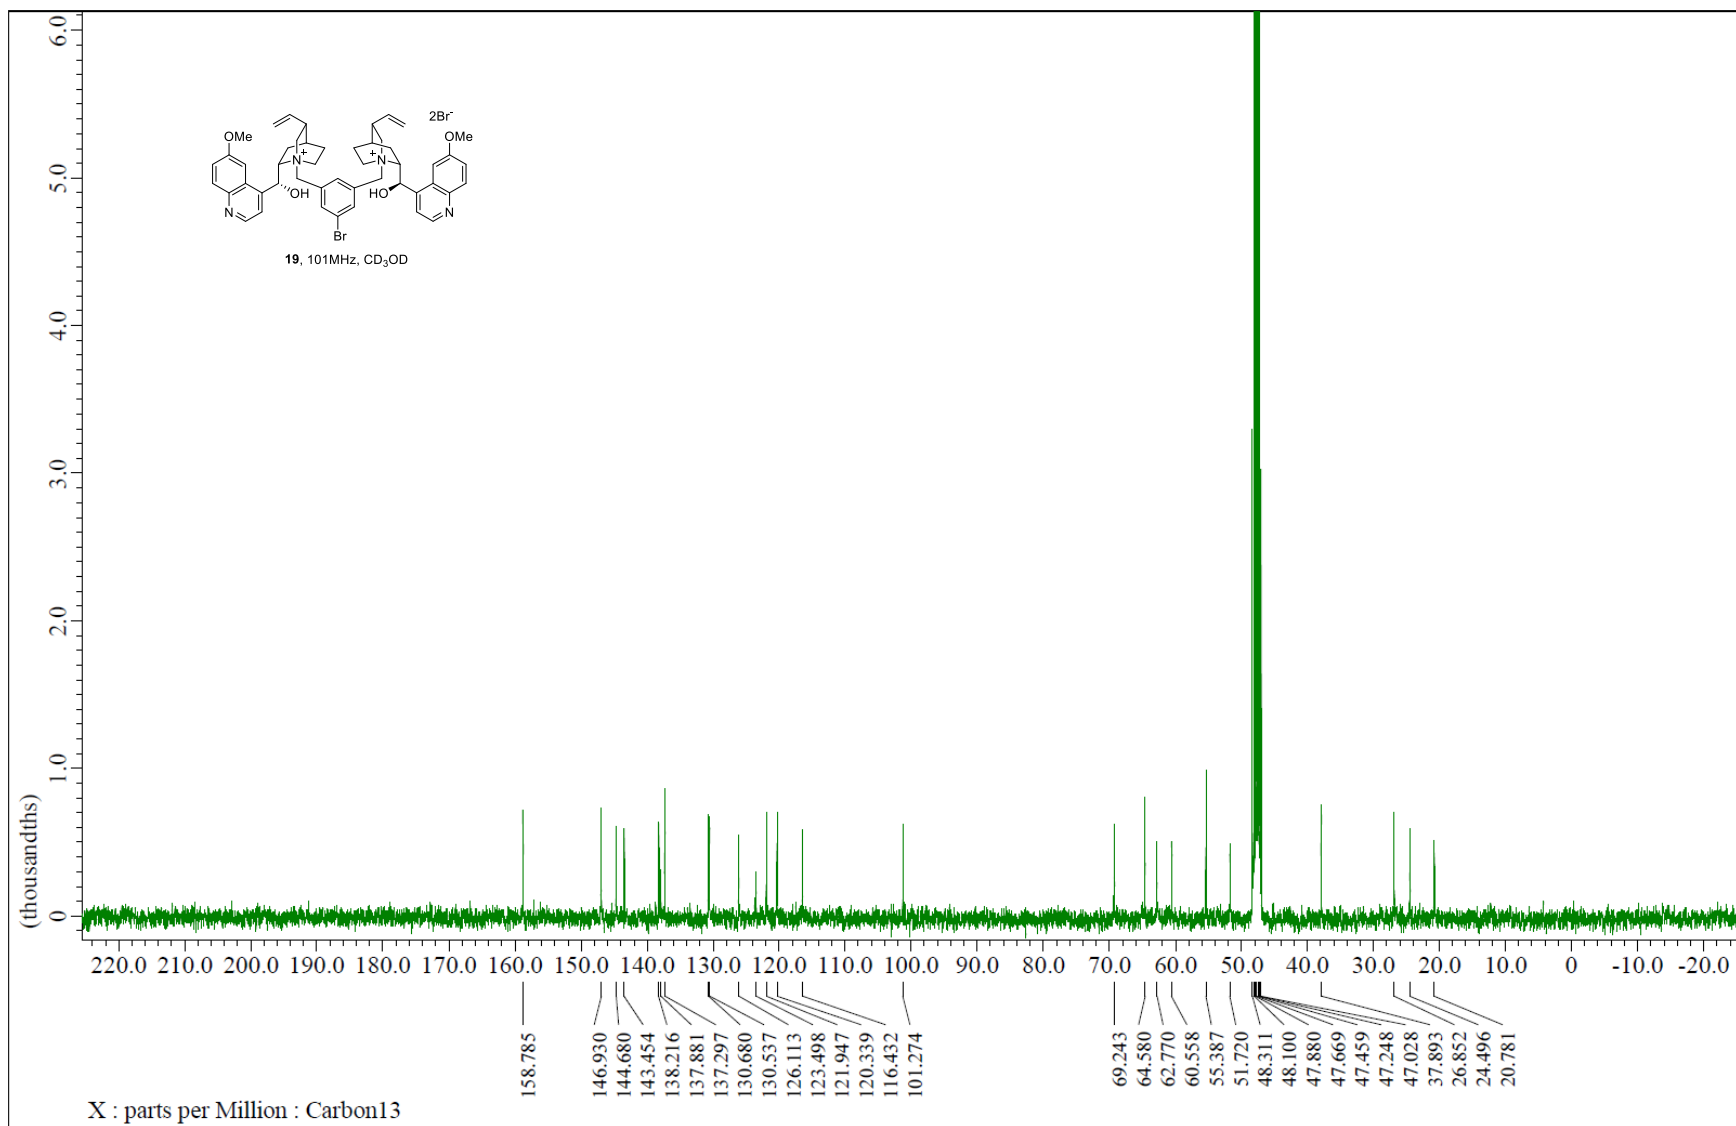

<sup>1</sup>H-NMR of compound 20

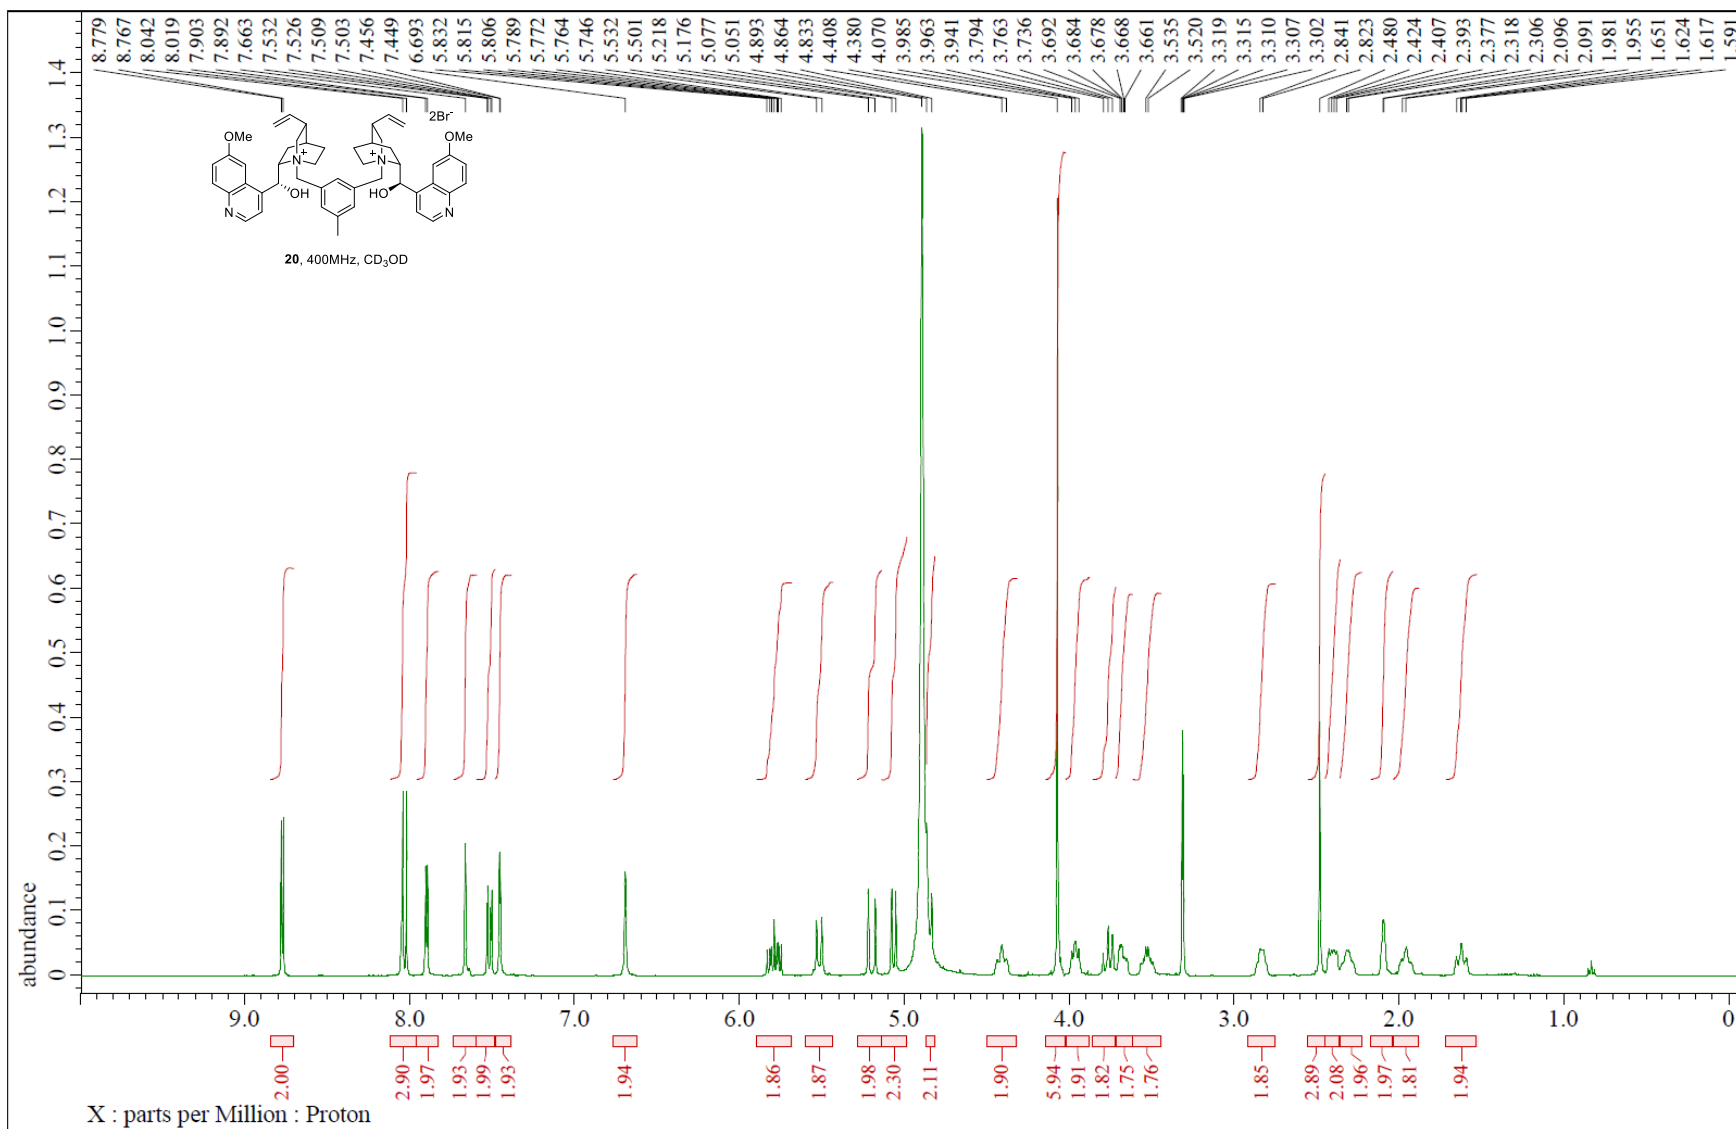

<sup>13</sup>C-NMR of compound **20**

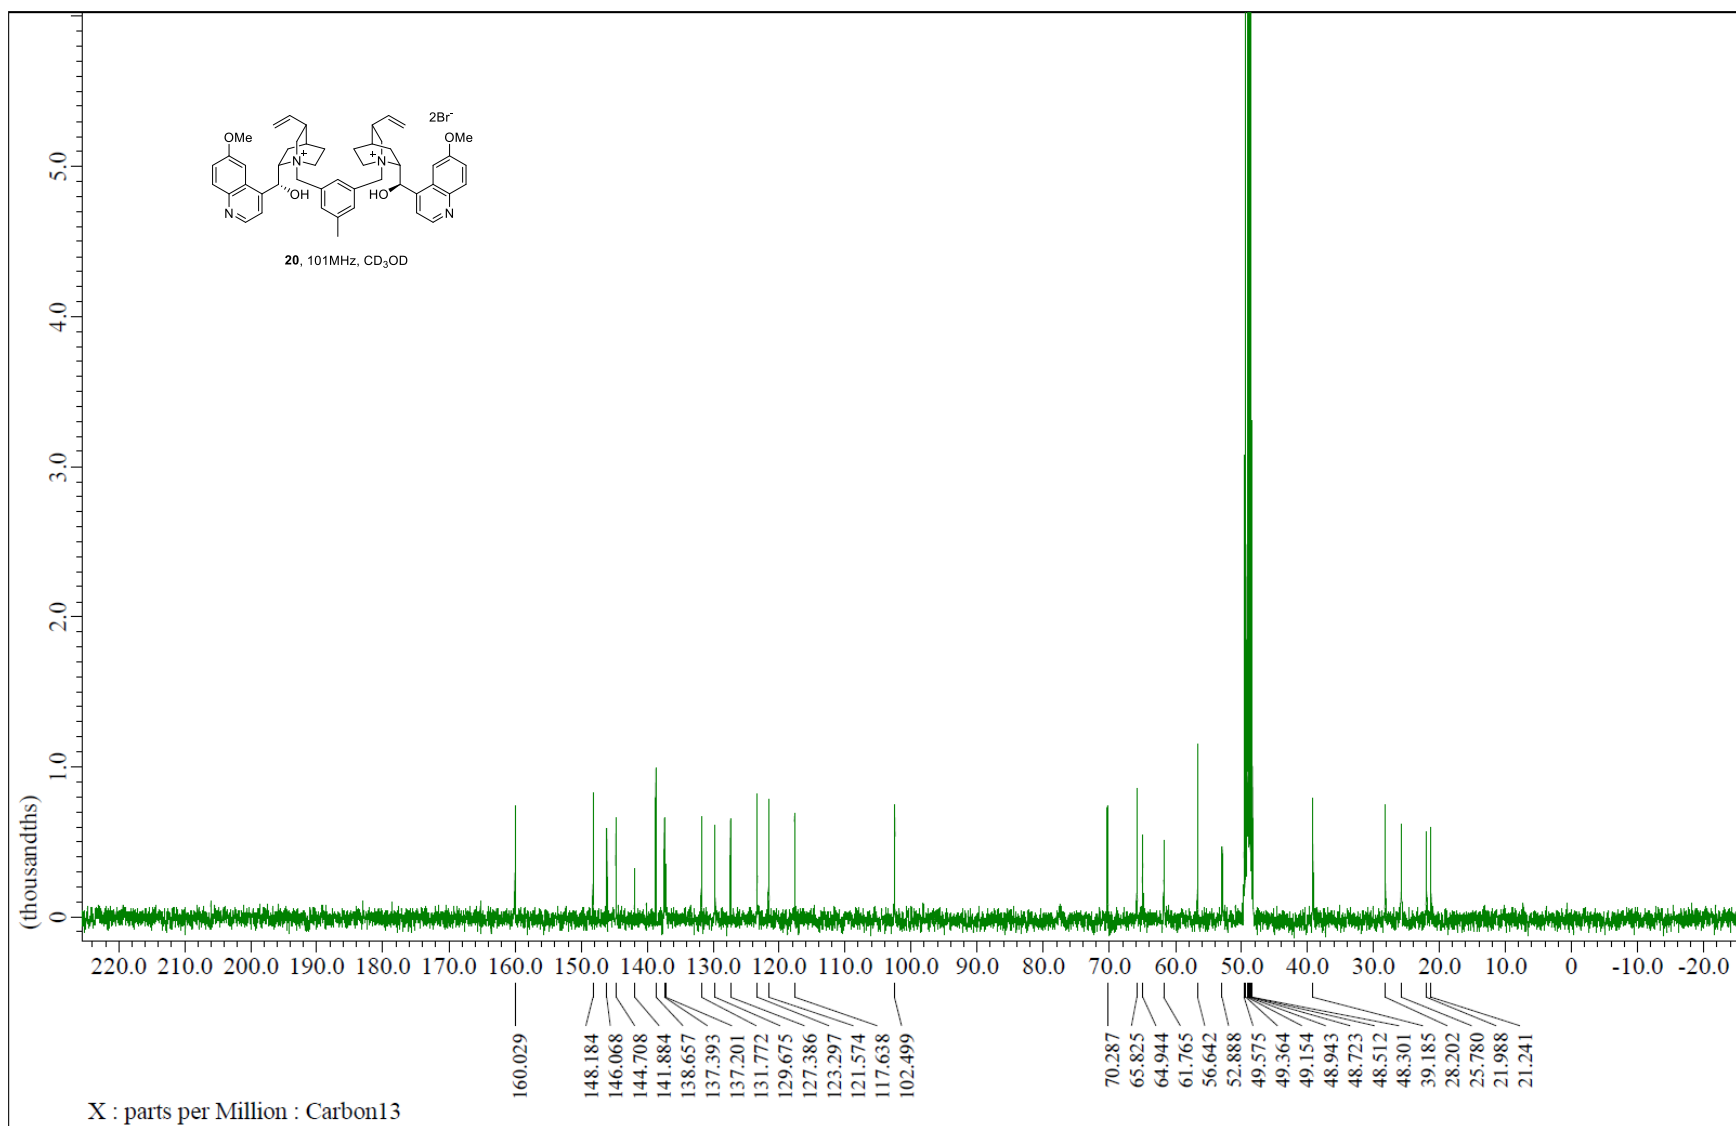

<sup>1</sup>H-NMR of compound 21

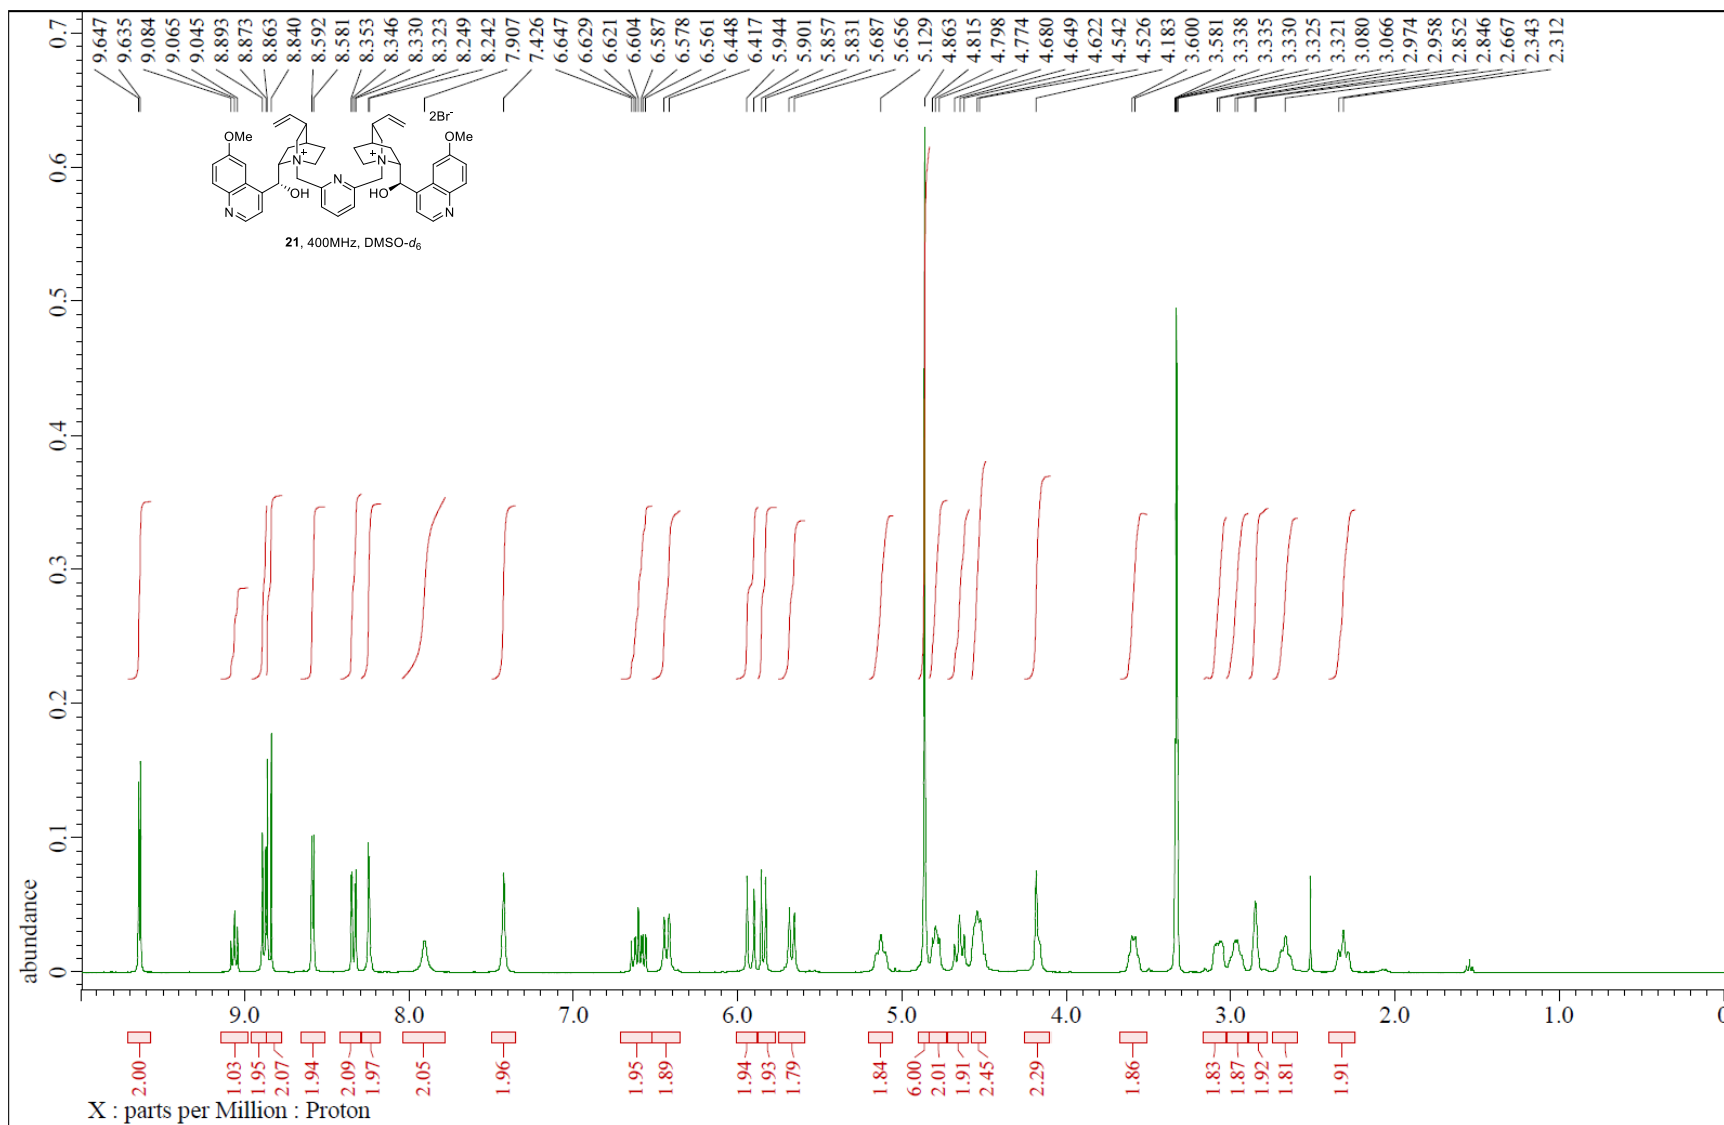

$^{13}\text{C-NMR}$  of compound **21**

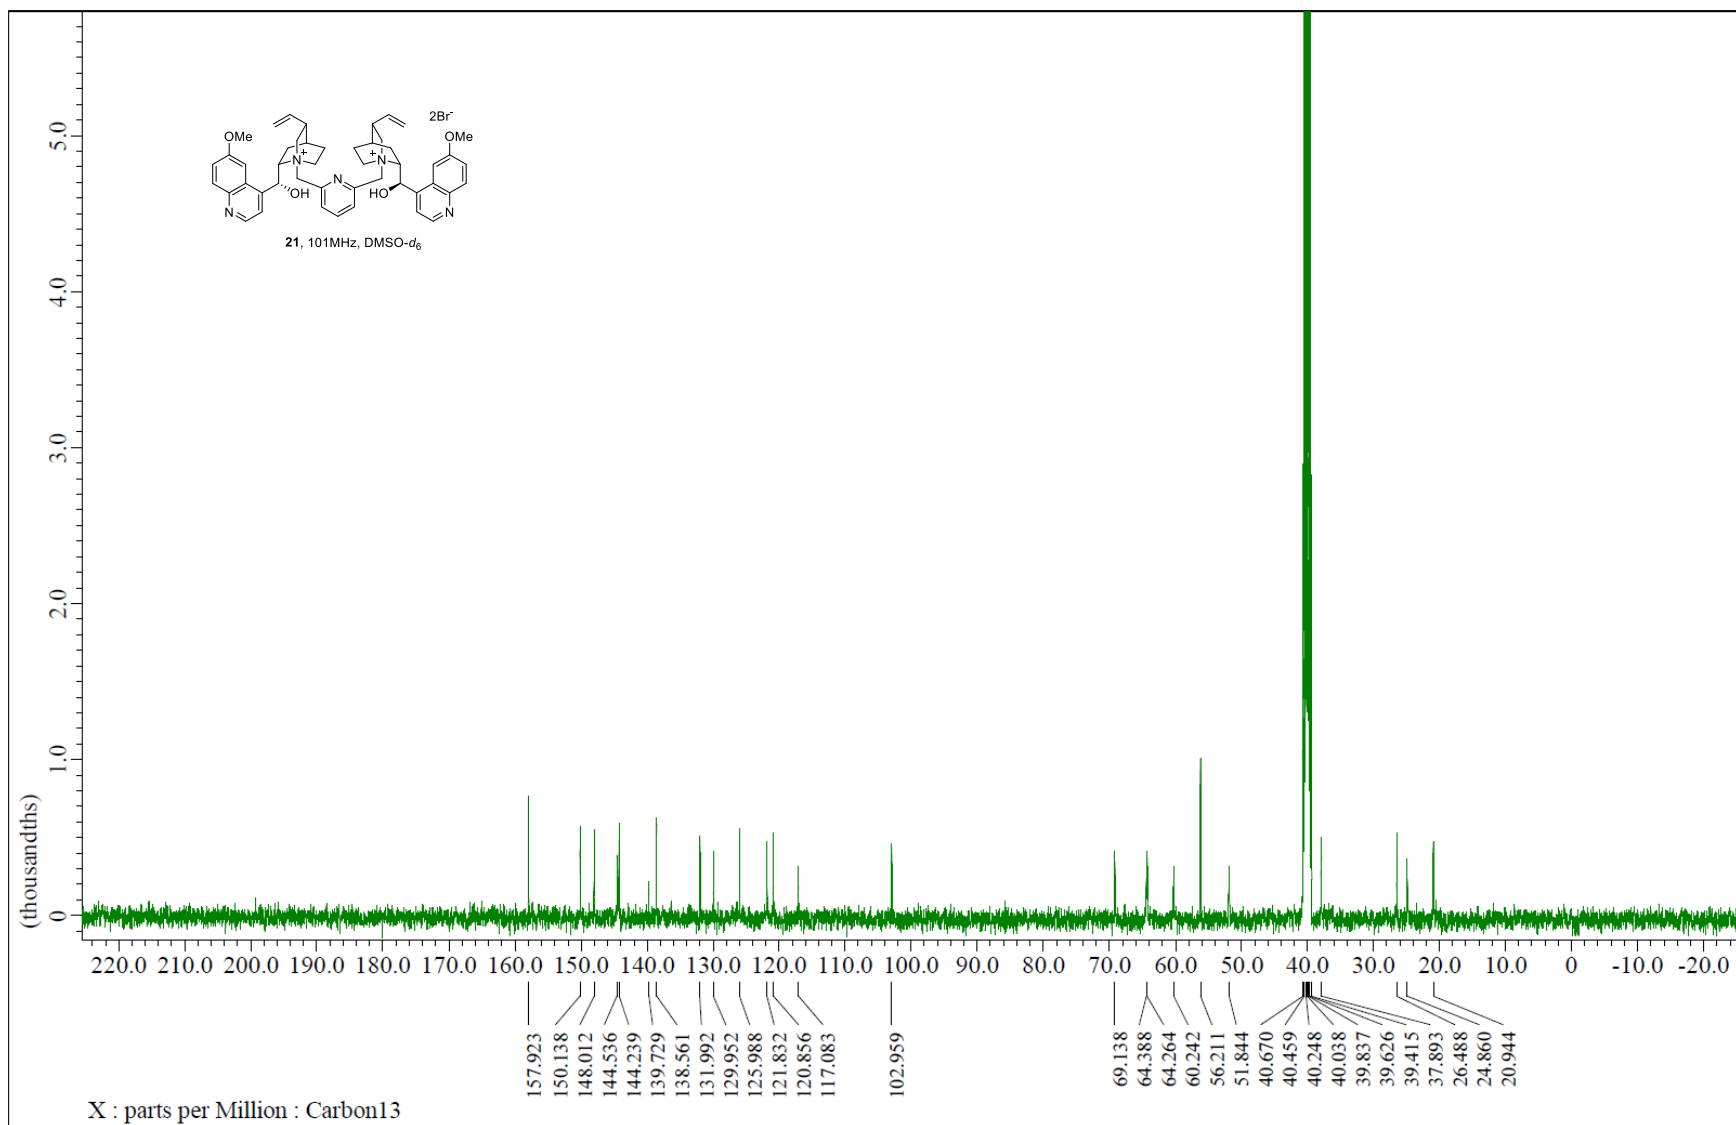

<sup>1</sup>H-NMR of compound 22

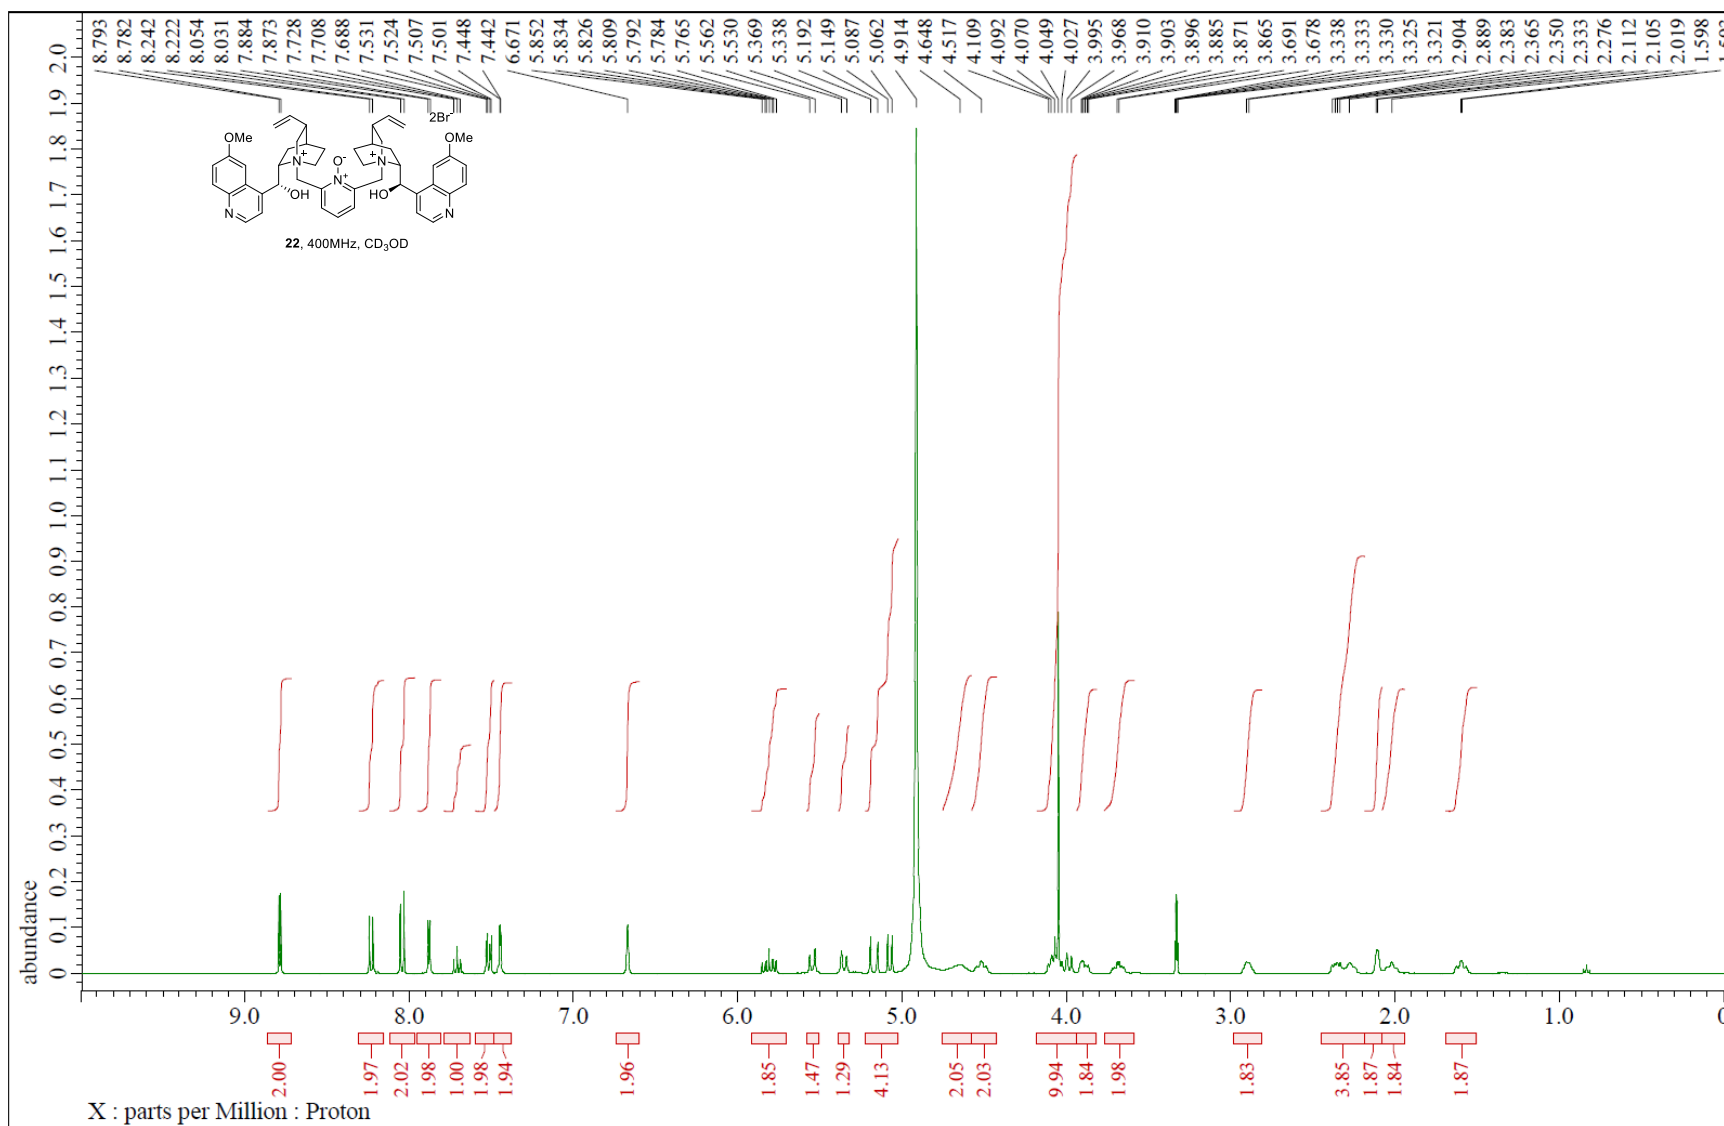

<sup>13</sup>C-NMR of compound **22**

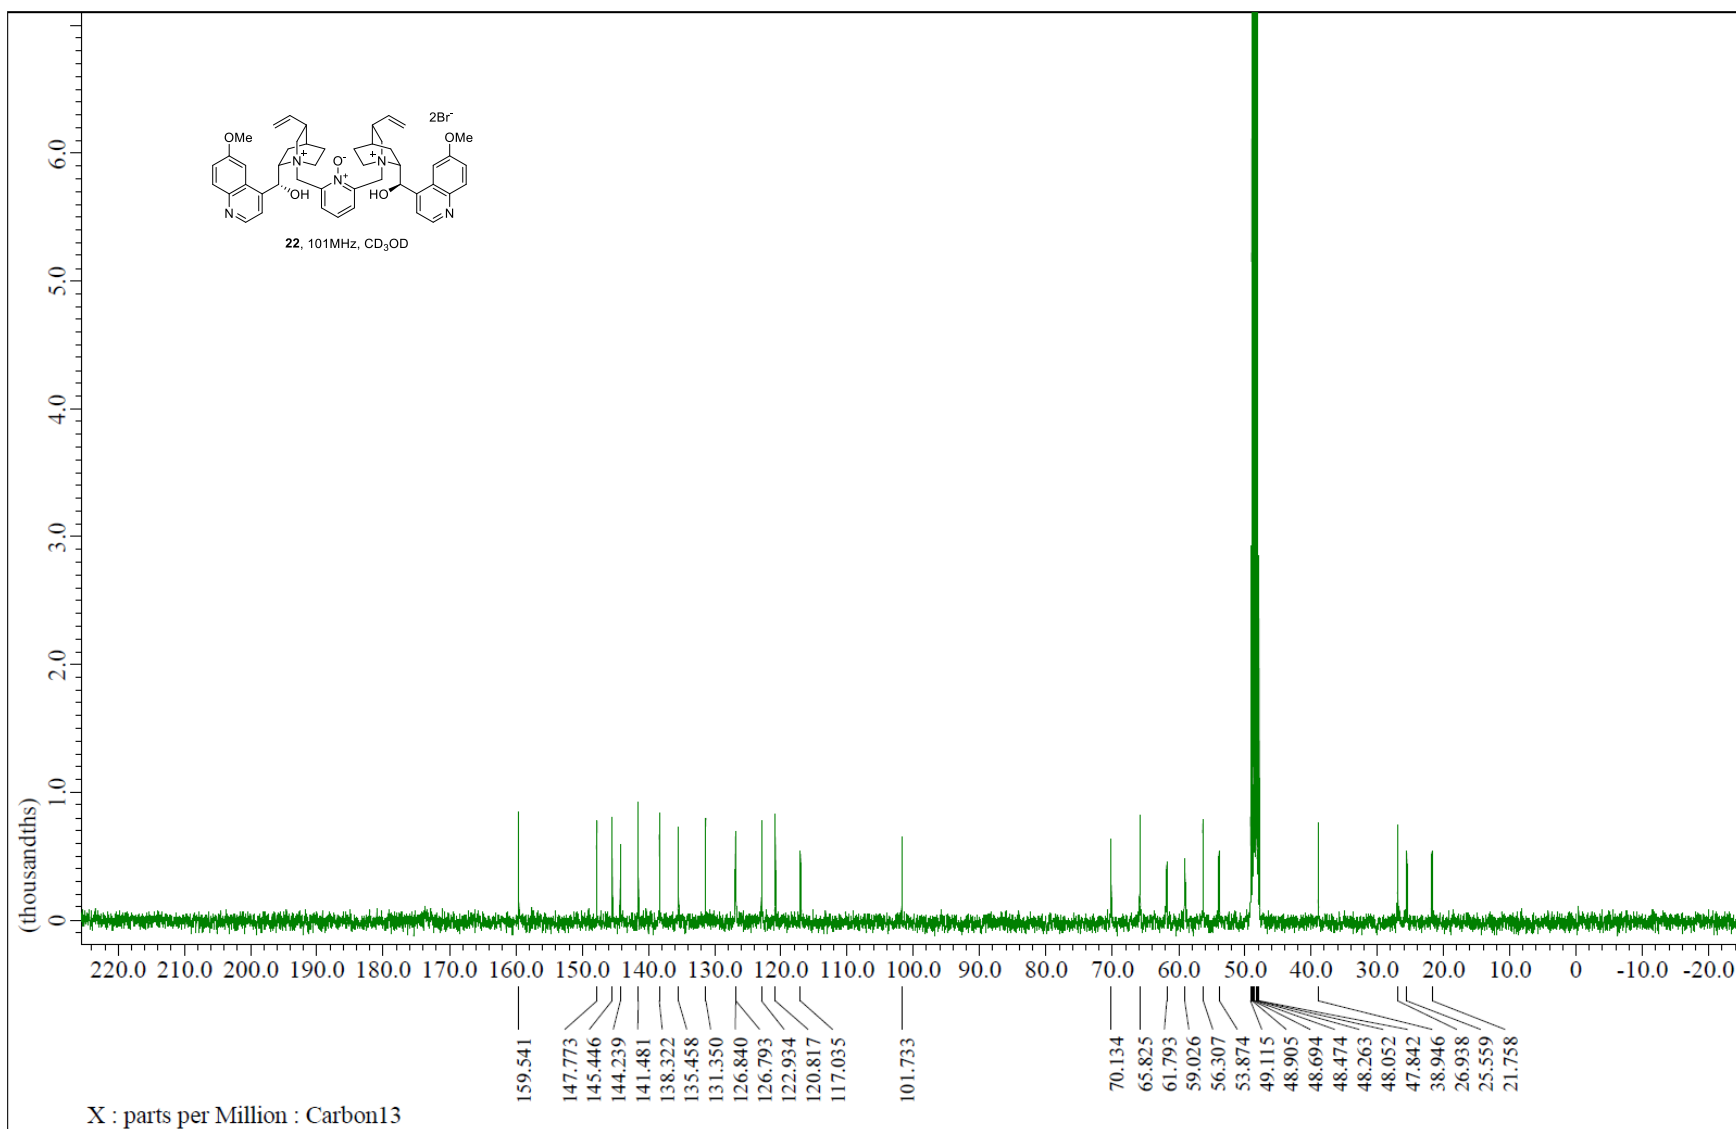



<sup>1</sup>H-NMR of compound 23

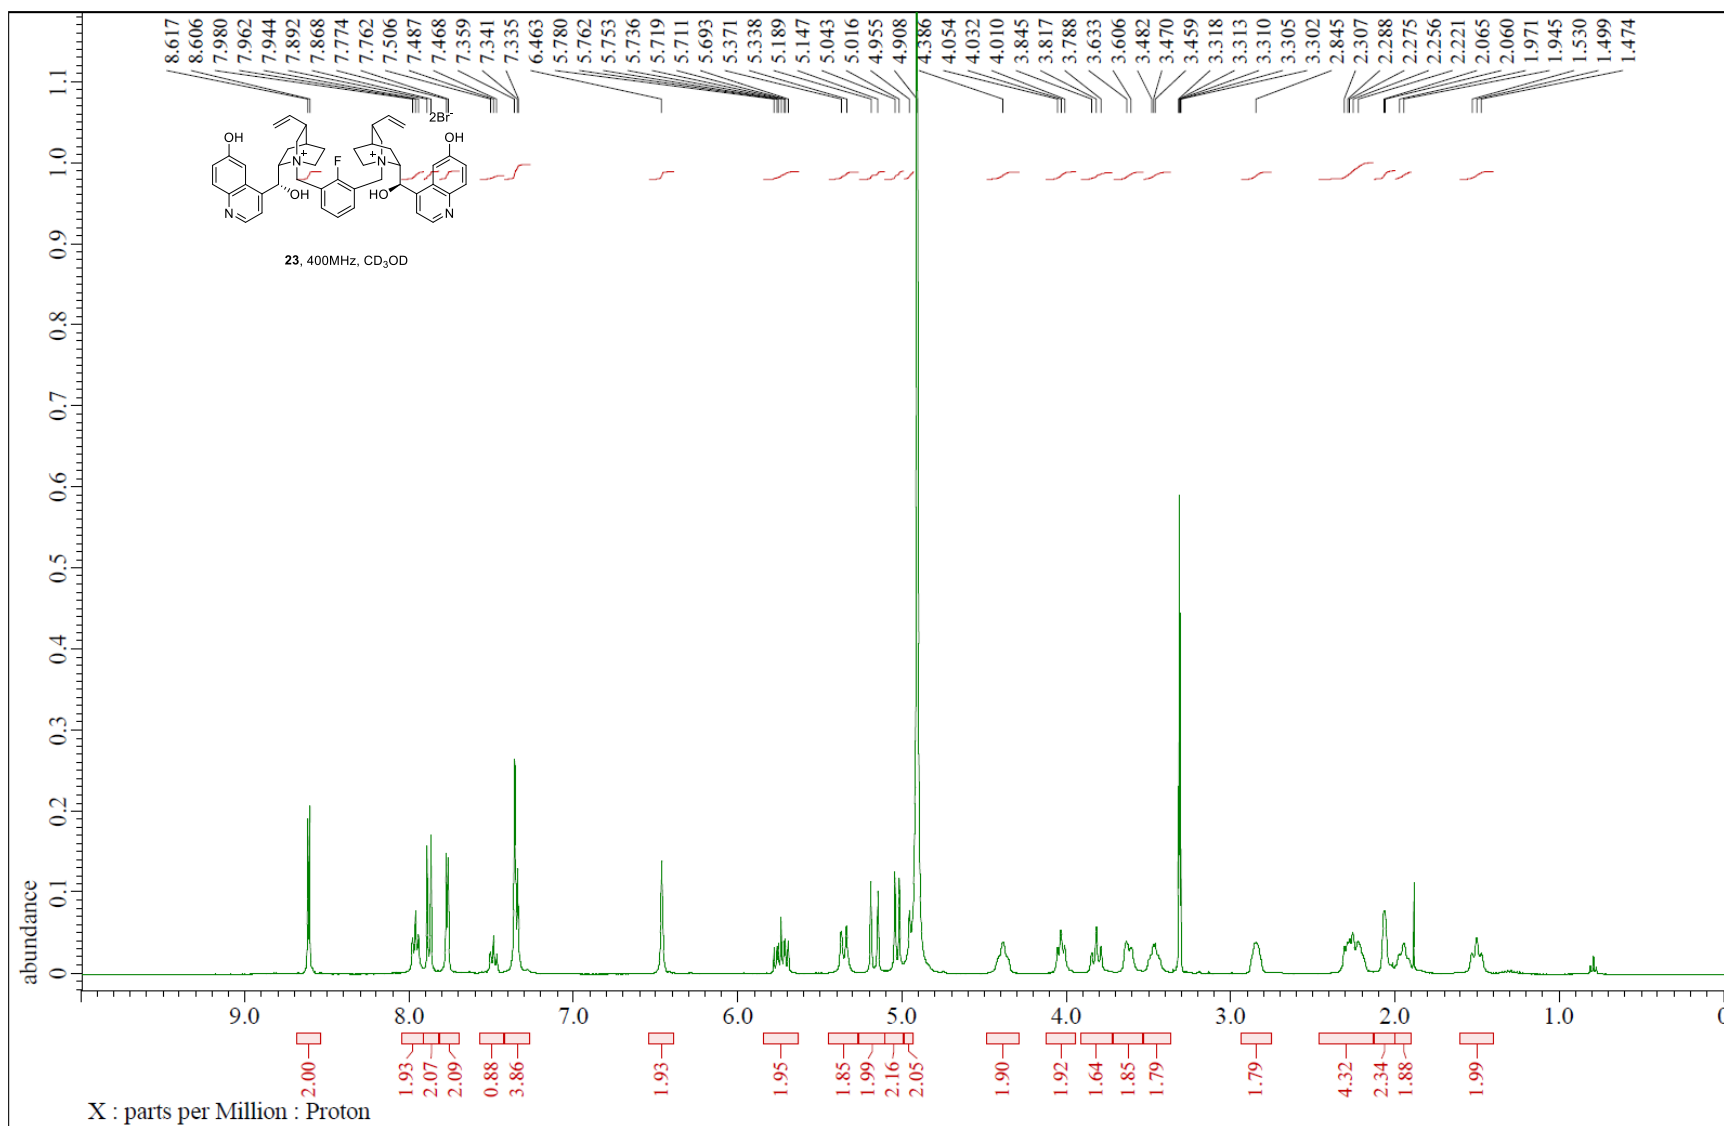

<sup>1</sup>H-NMR of compound 23

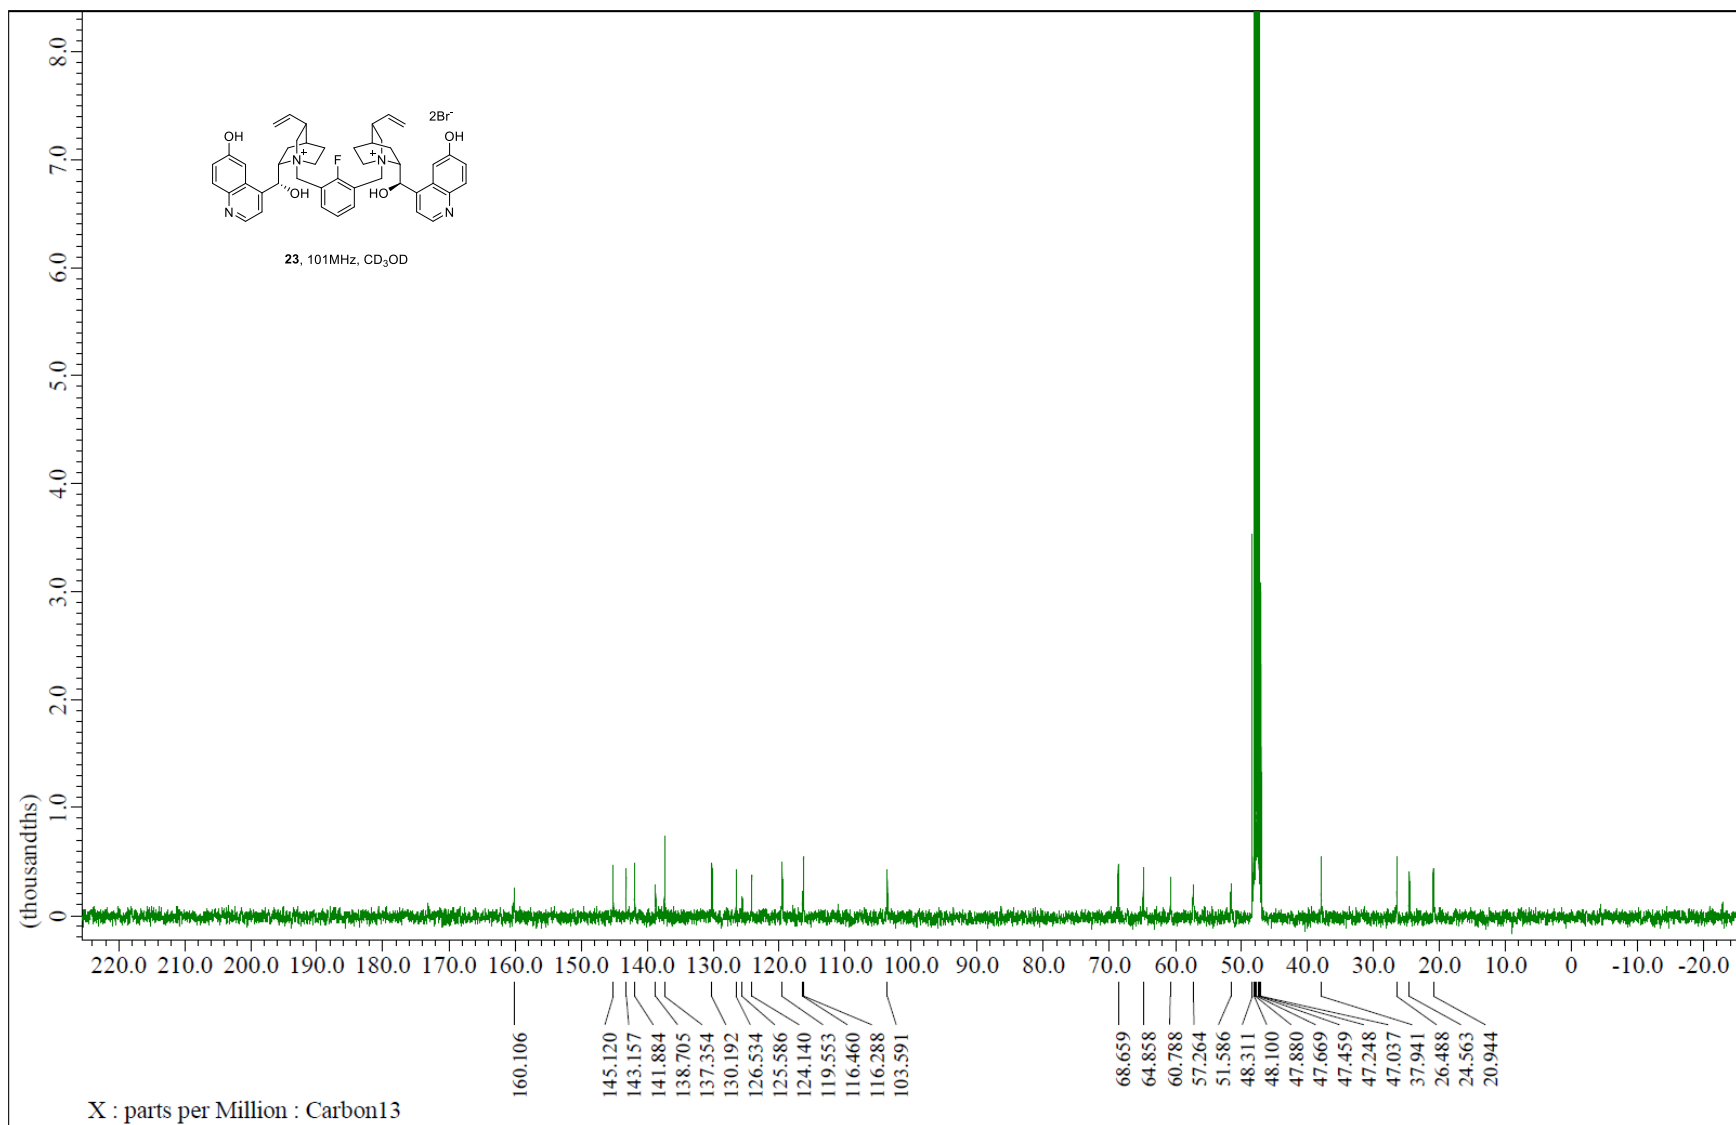

<sup>1</sup>H-NMR of compound 24

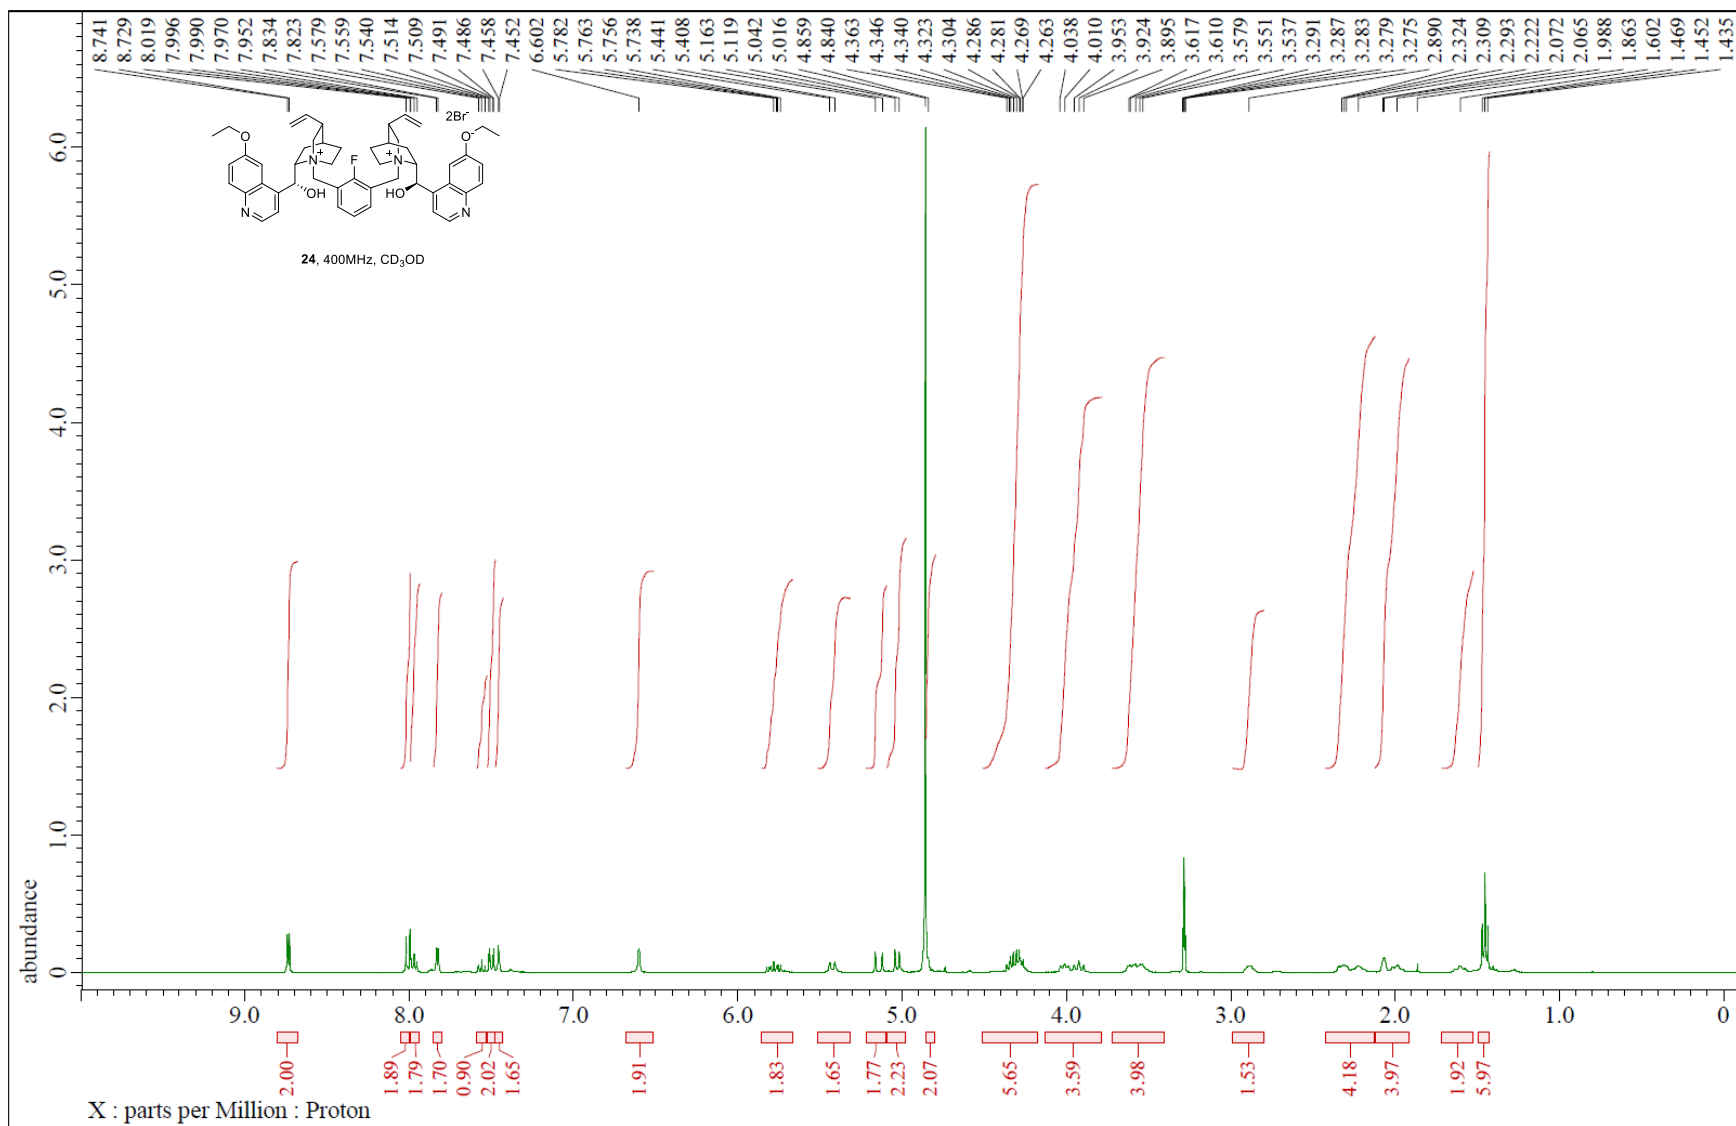

<sup>13</sup>C-NMR of compound **24**

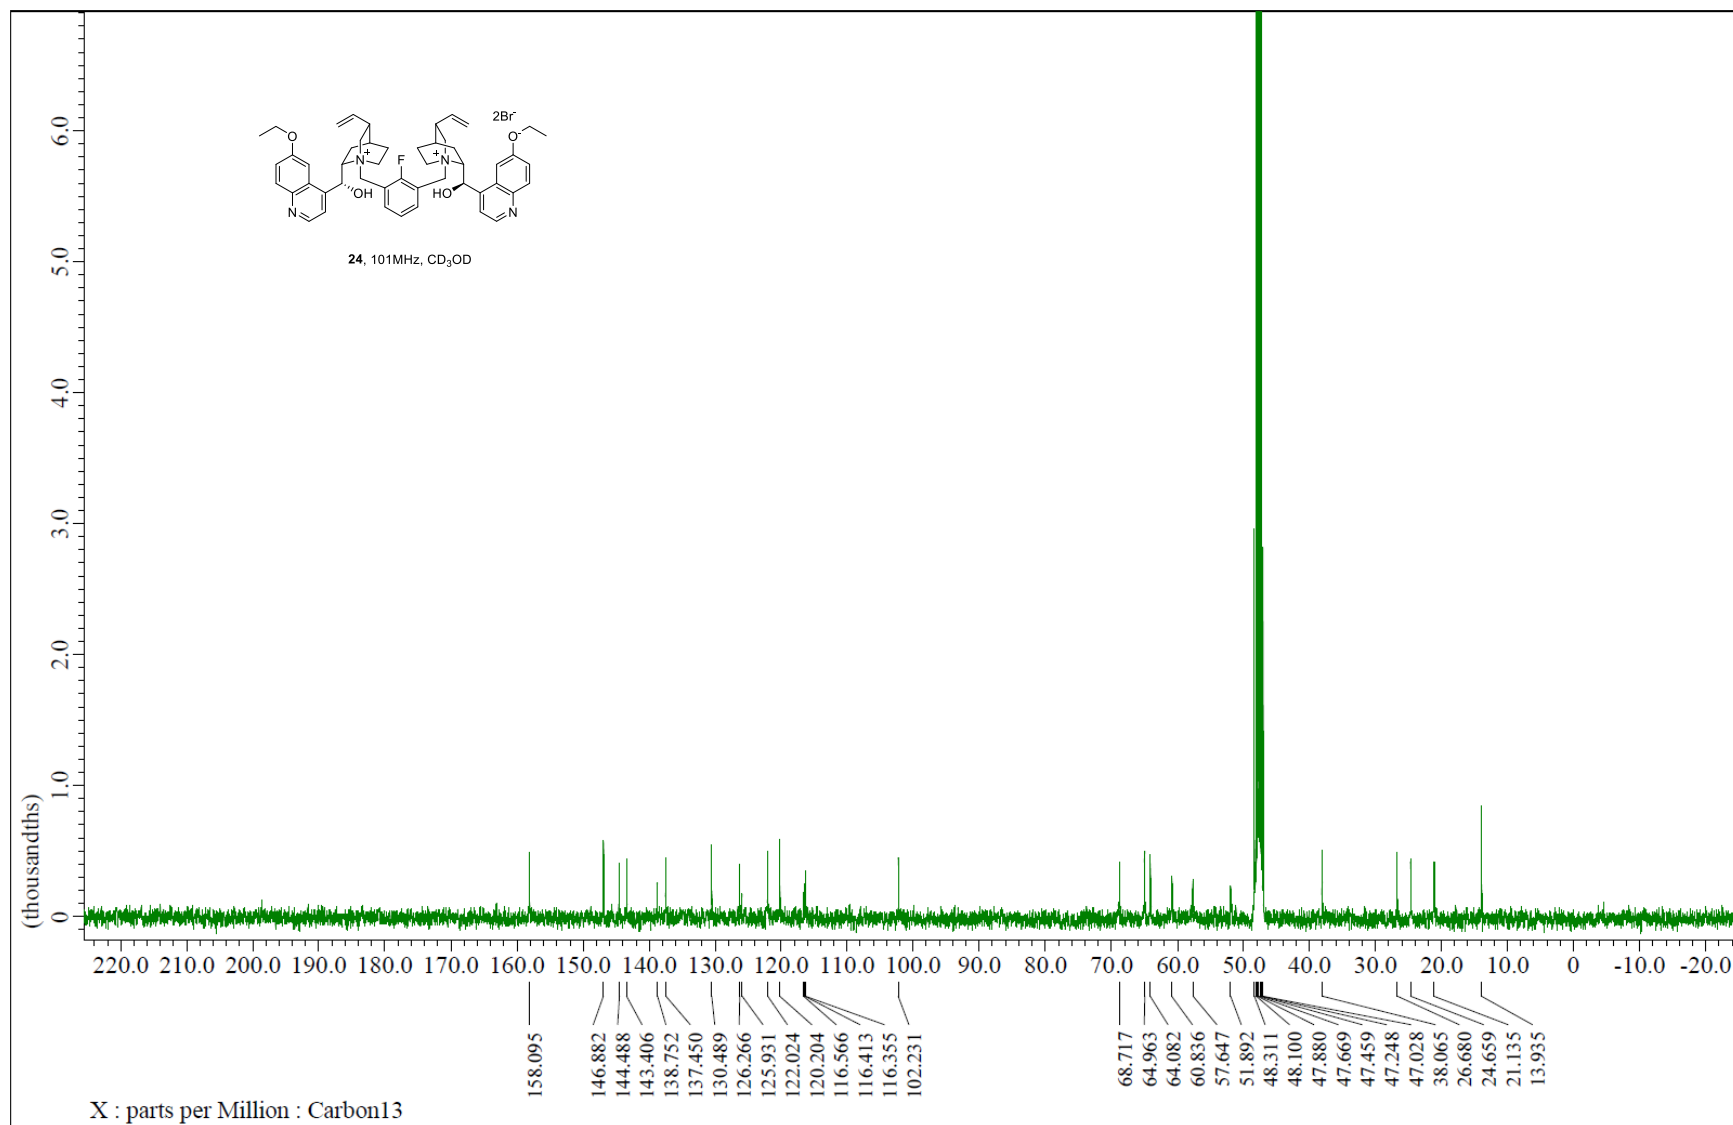

<sup>1</sup>H-NMR of compound 25

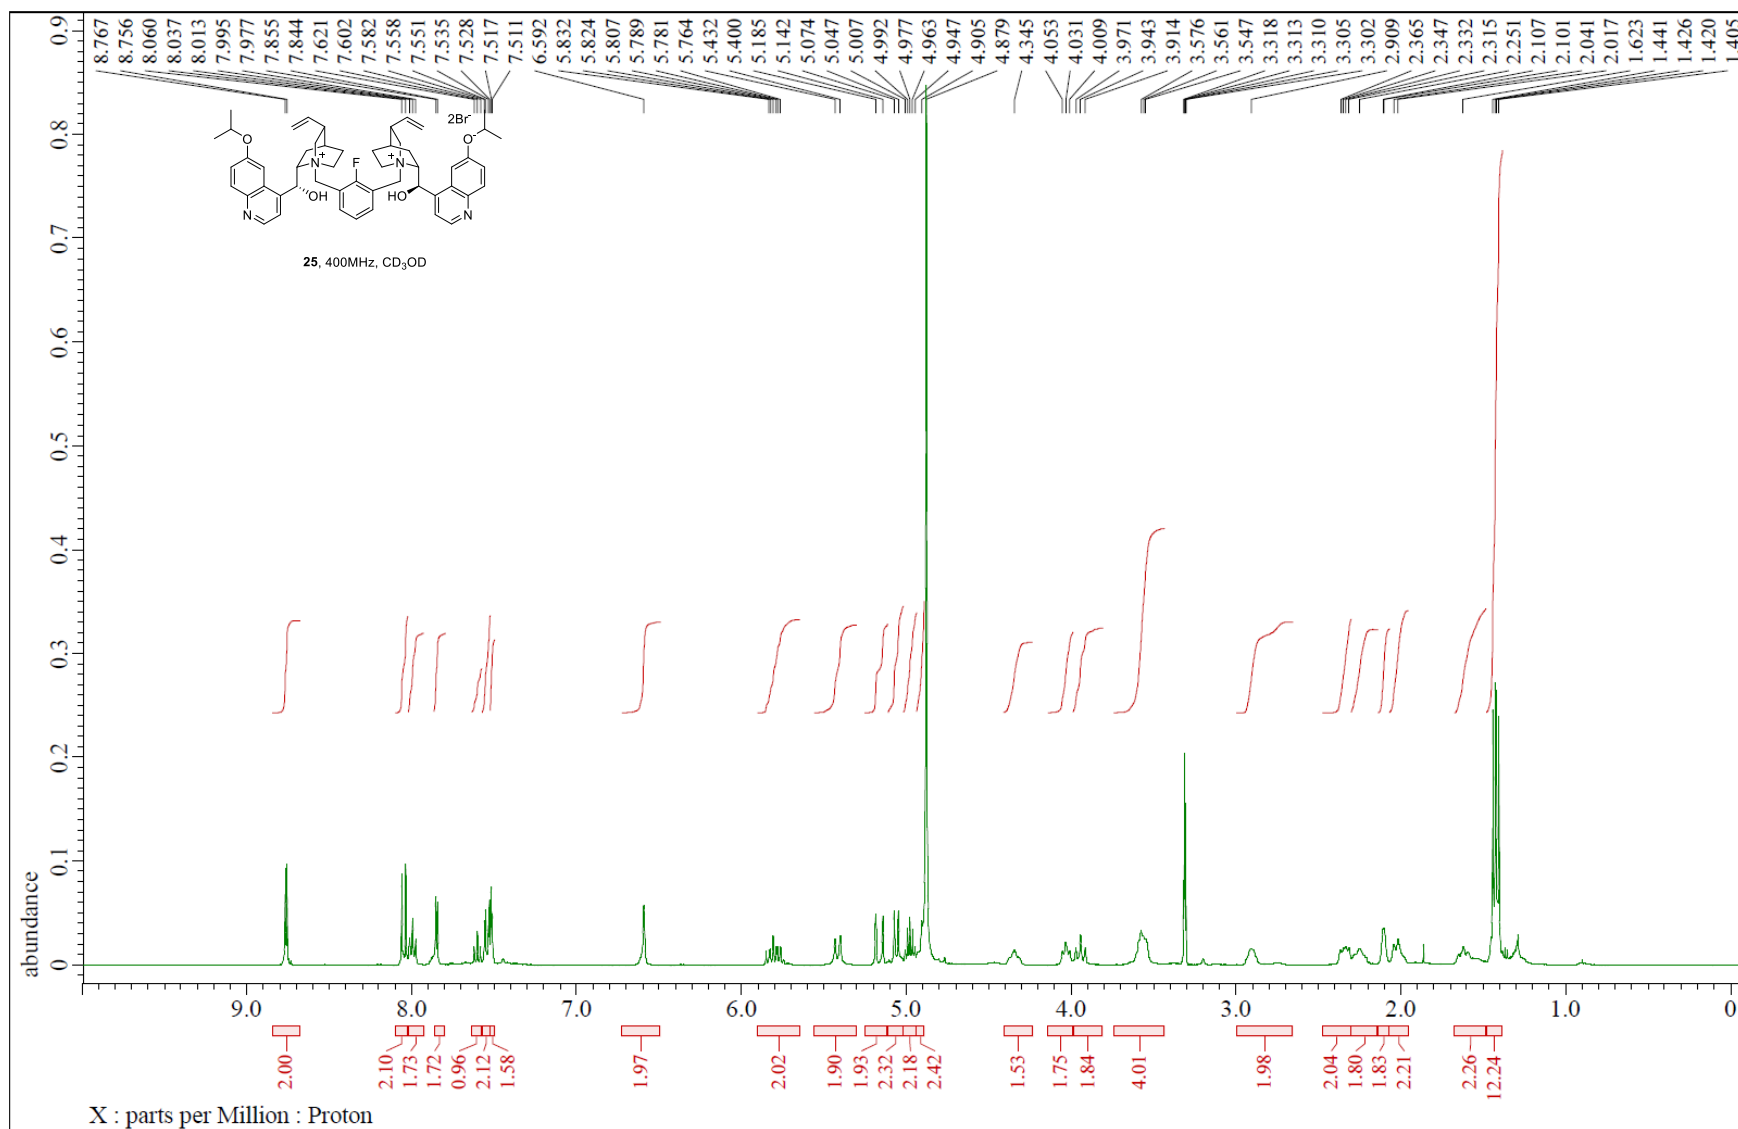

<sup>13</sup>C-NMR of compound **25**

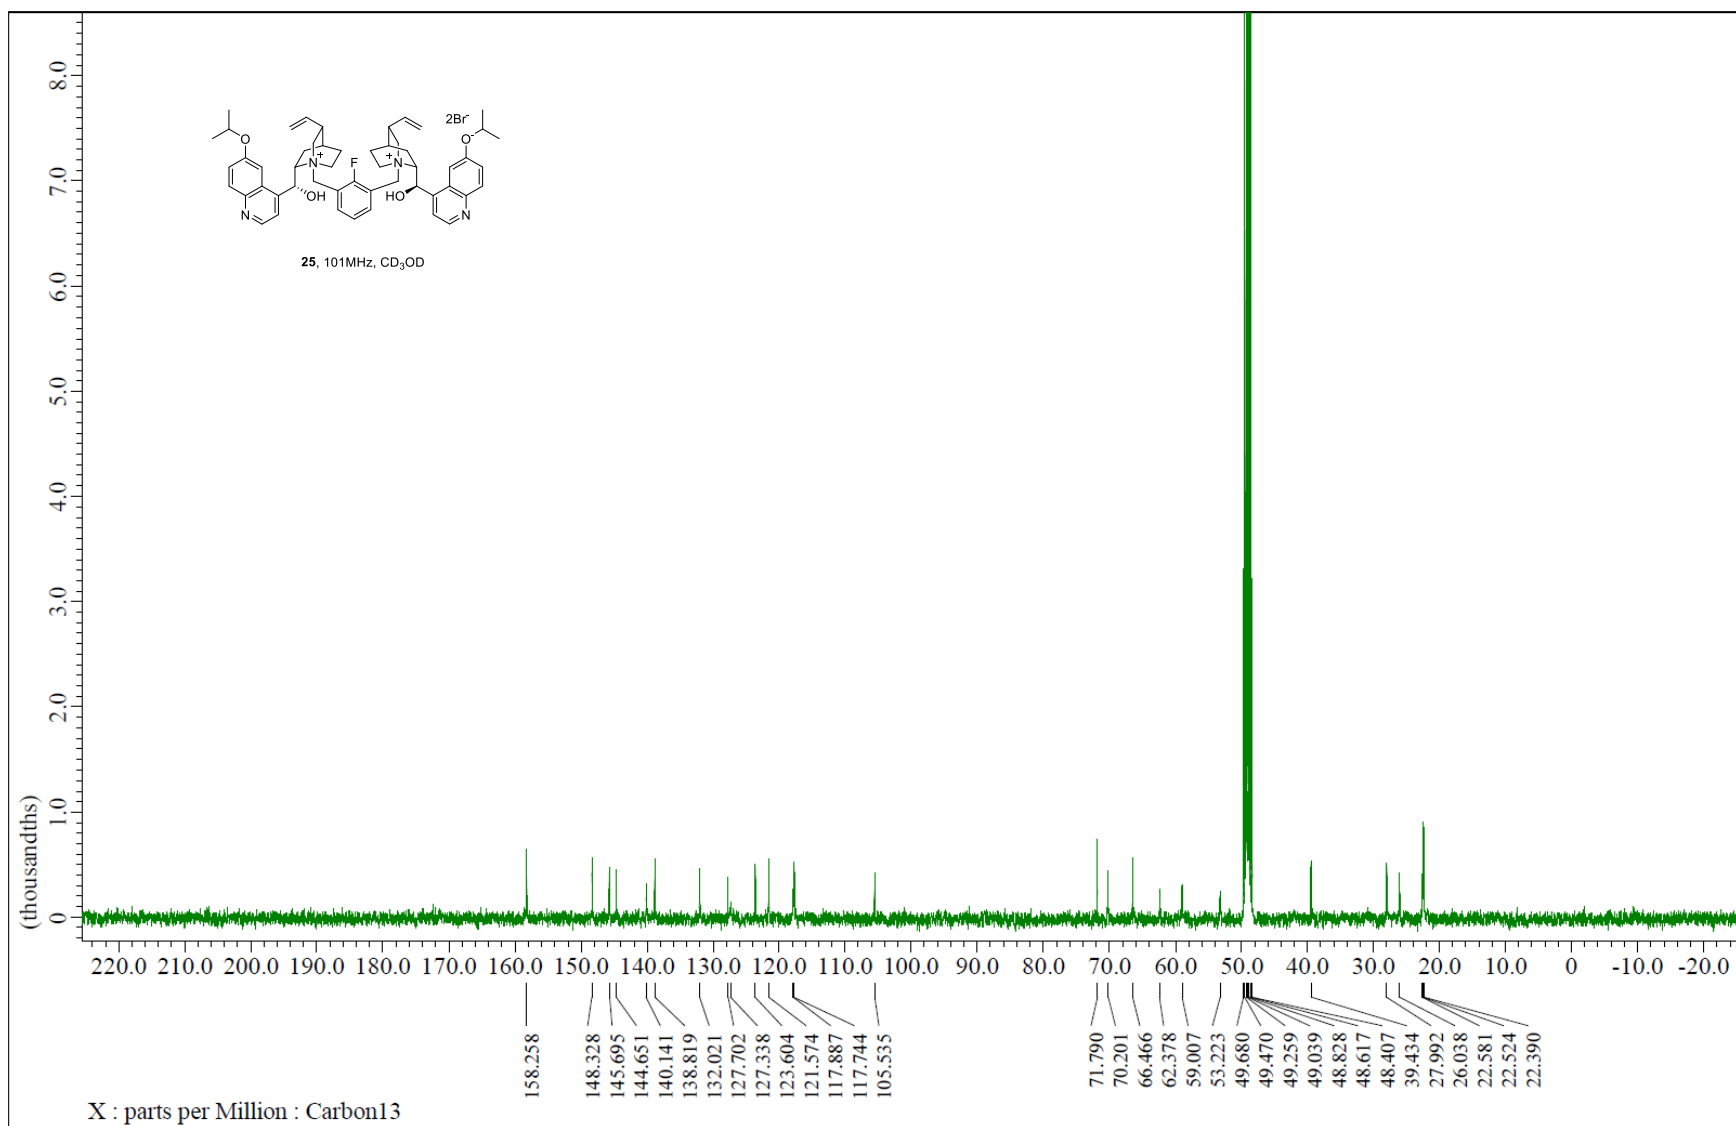

<sup>1</sup>H-NMR of compound 26

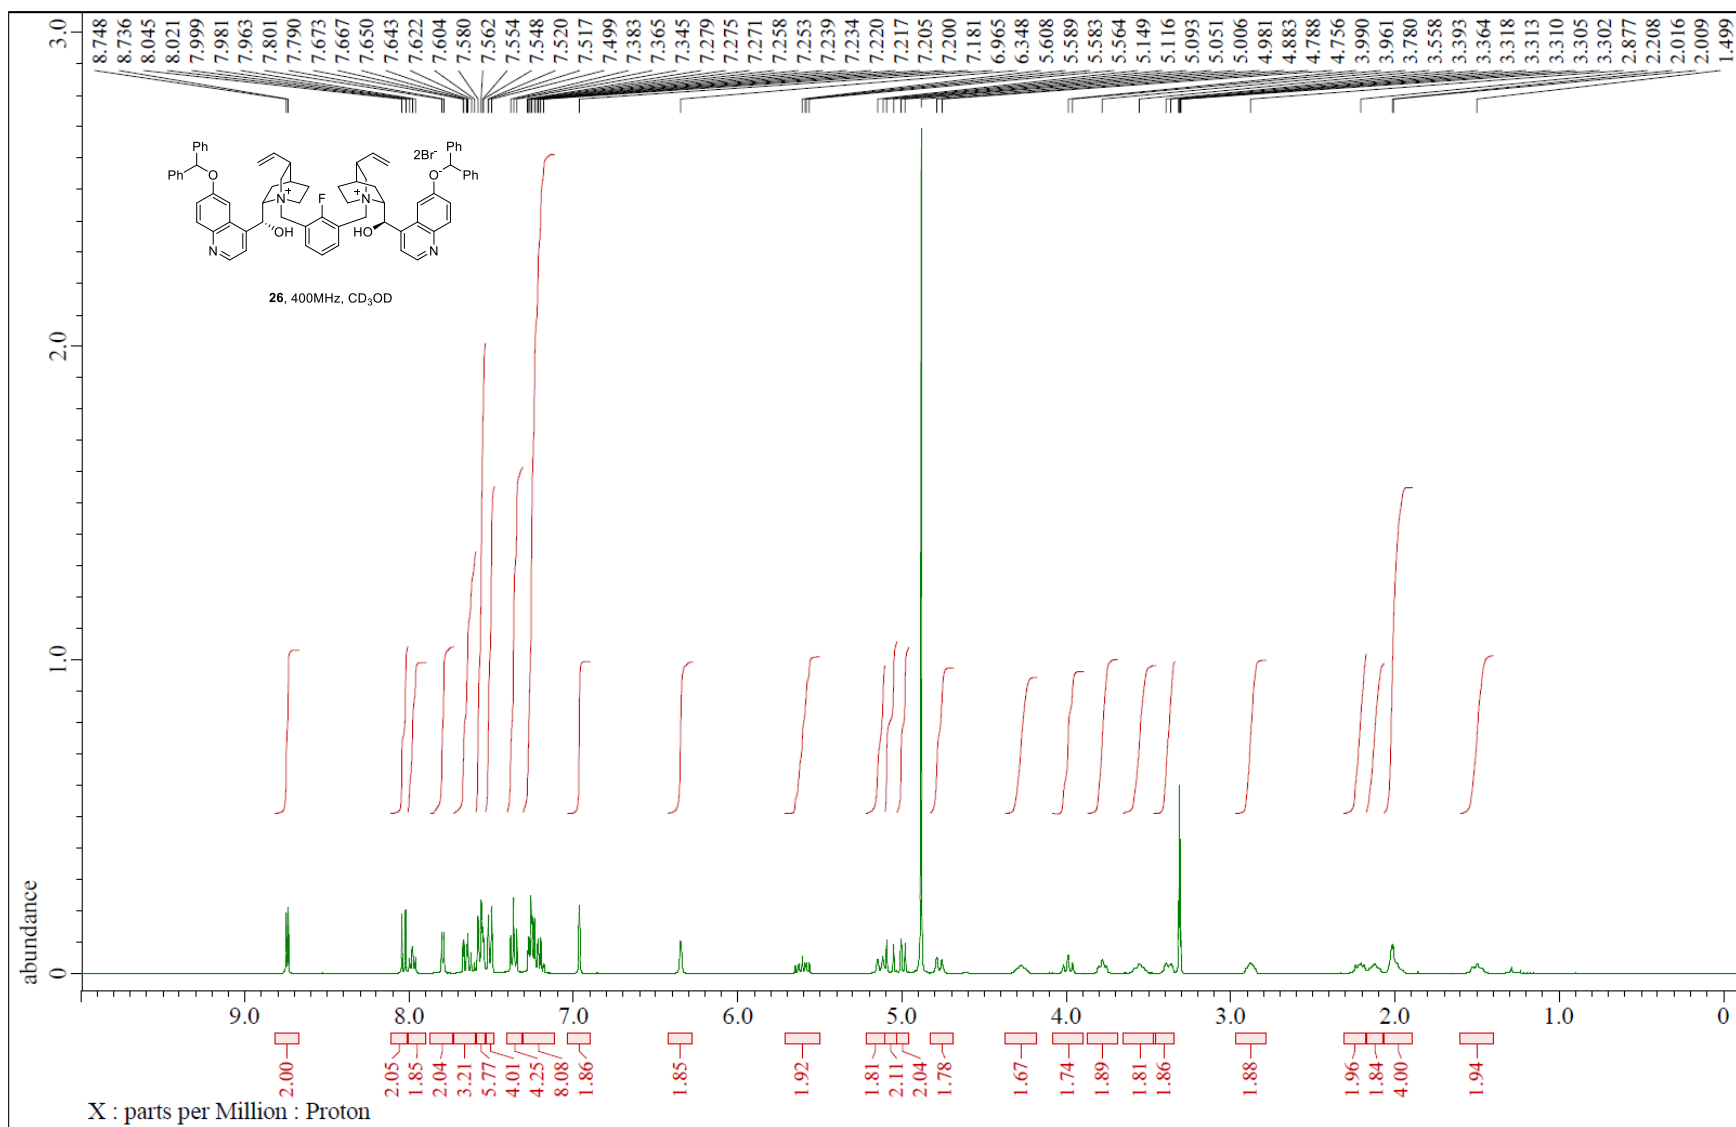

<sup>13</sup>C-NMR of compound **26**

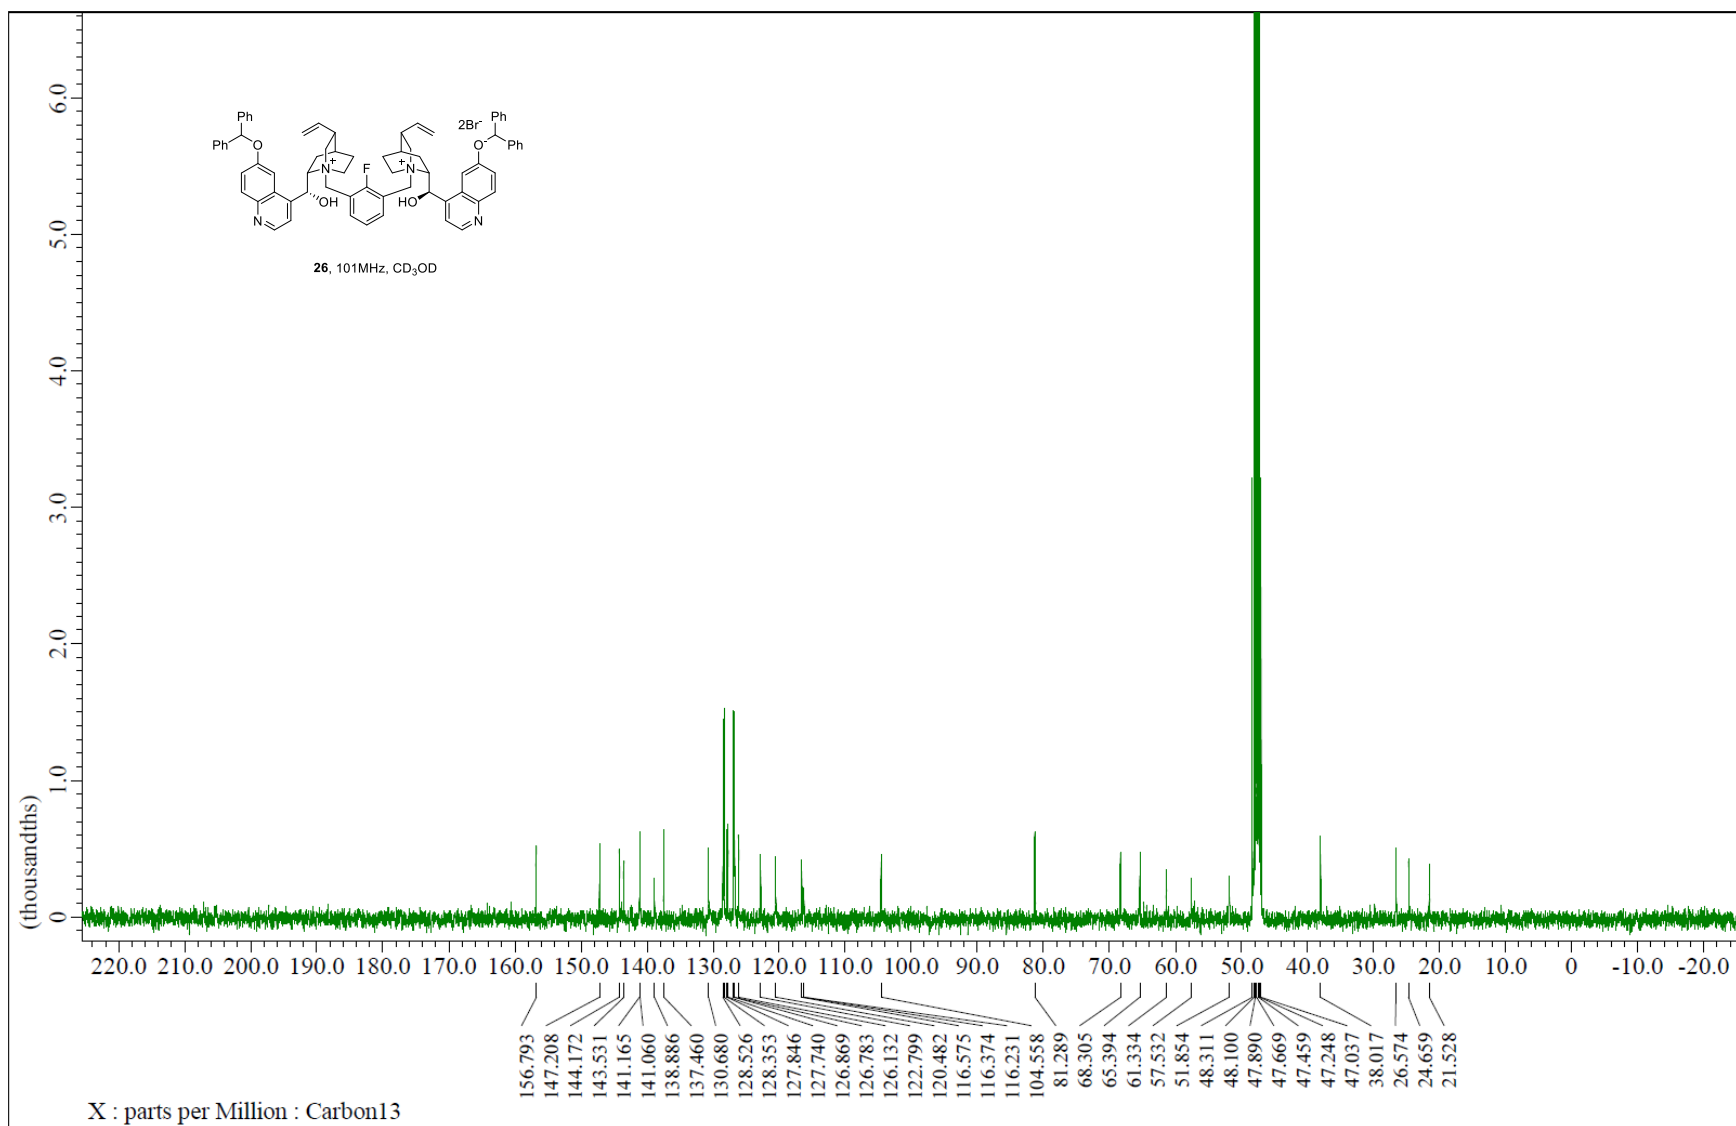



<sup>1</sup>H-NMR of compound S2

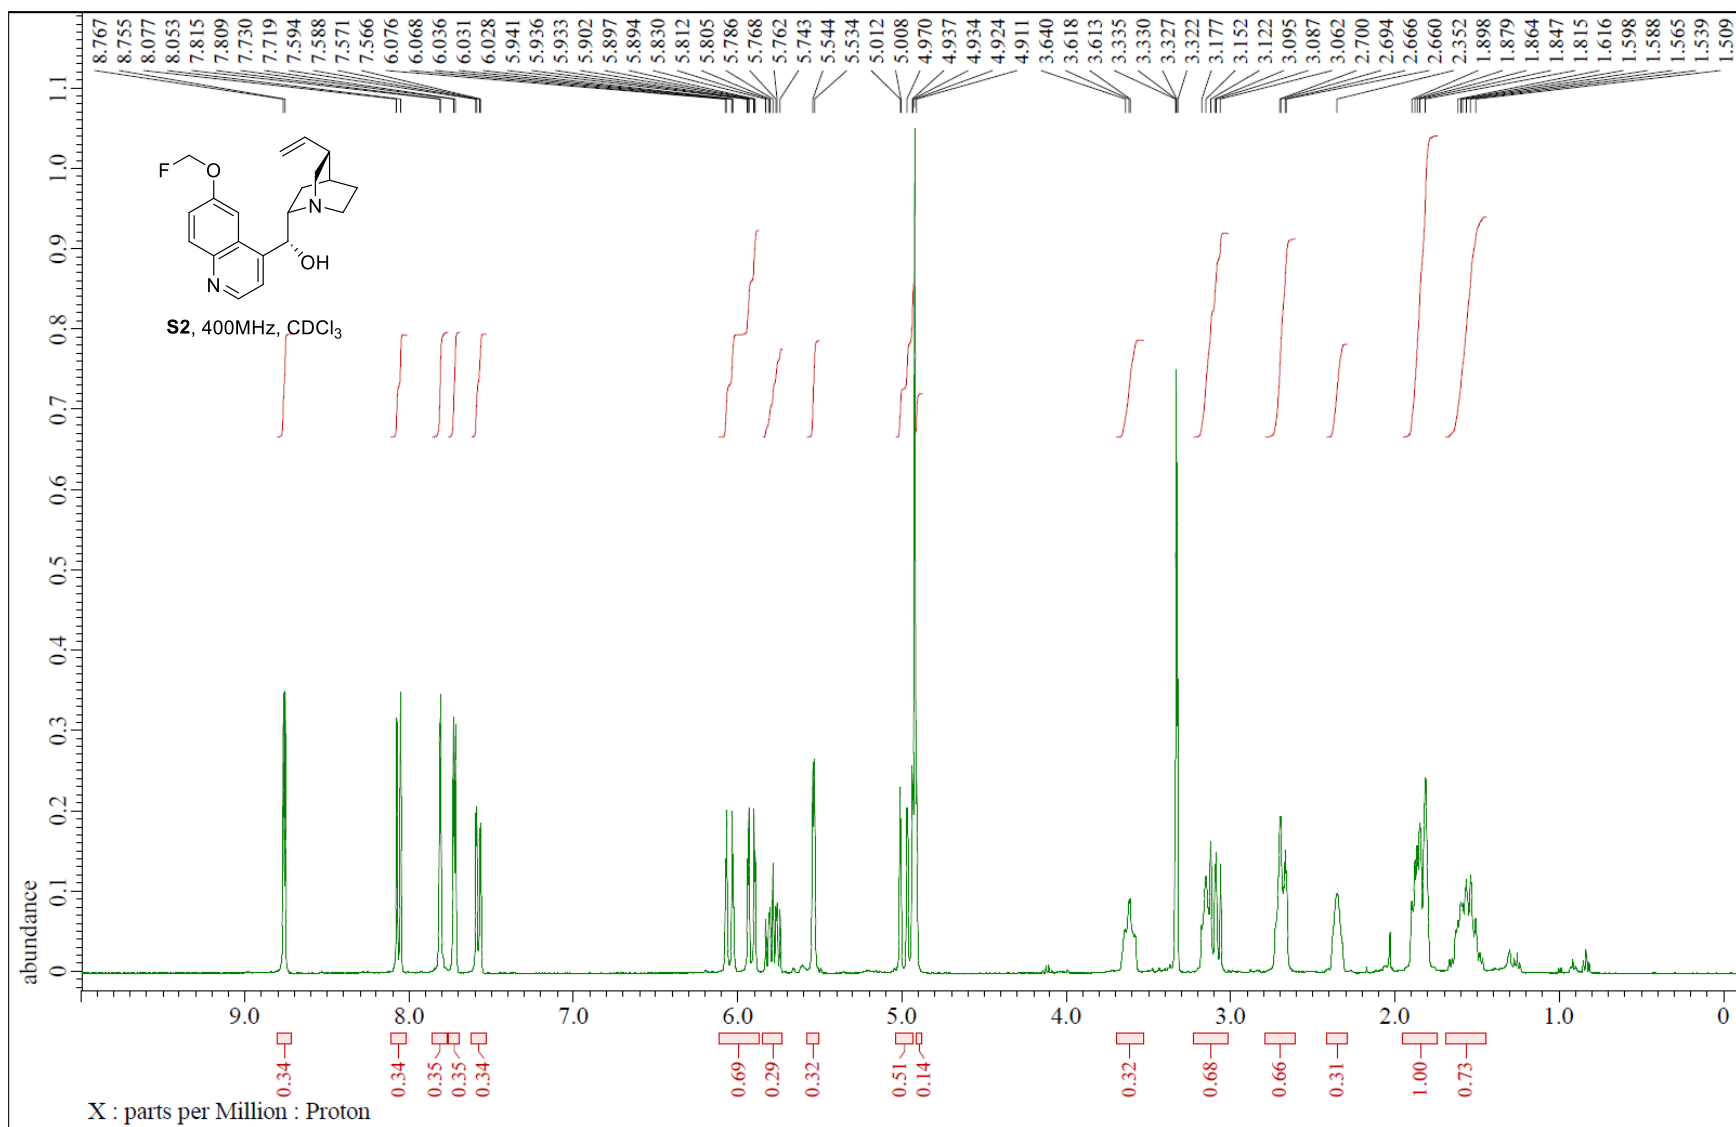

<sup>13</sup>C-NMR of compound **S2**

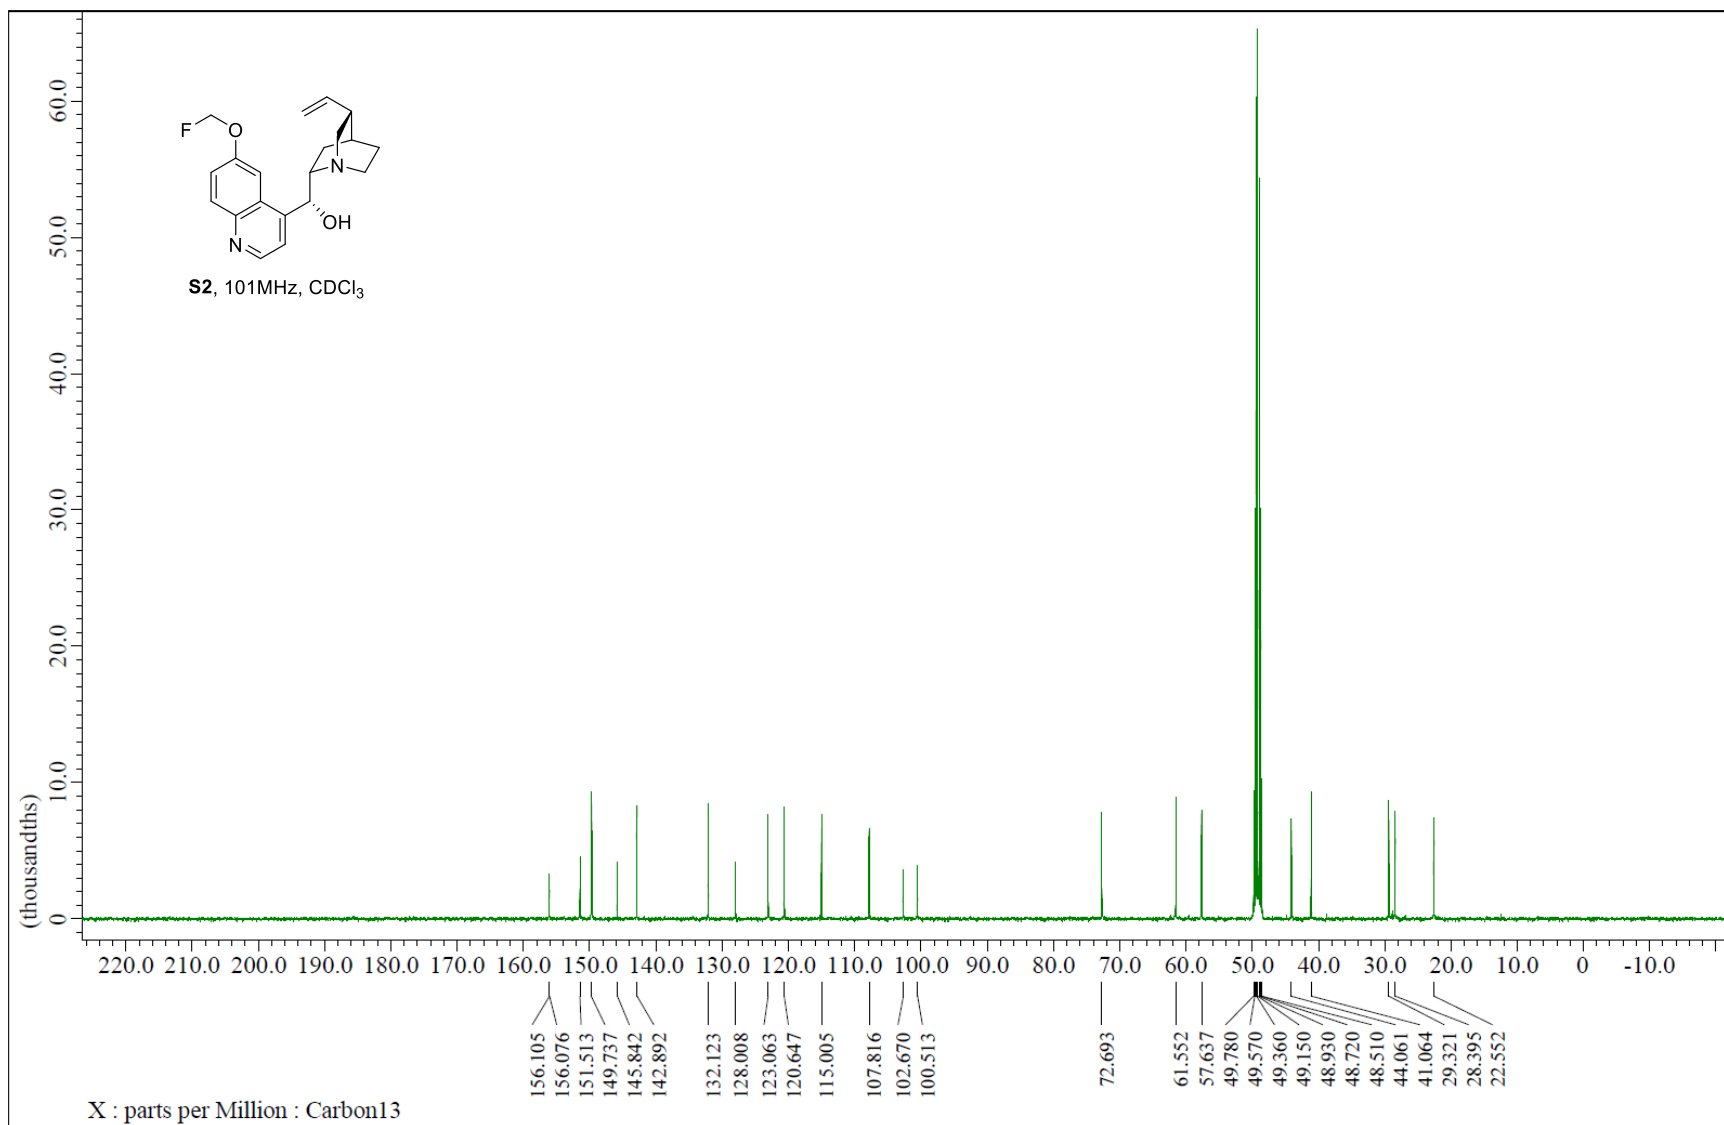

<sup>1</sup>H-NMR of compound 27

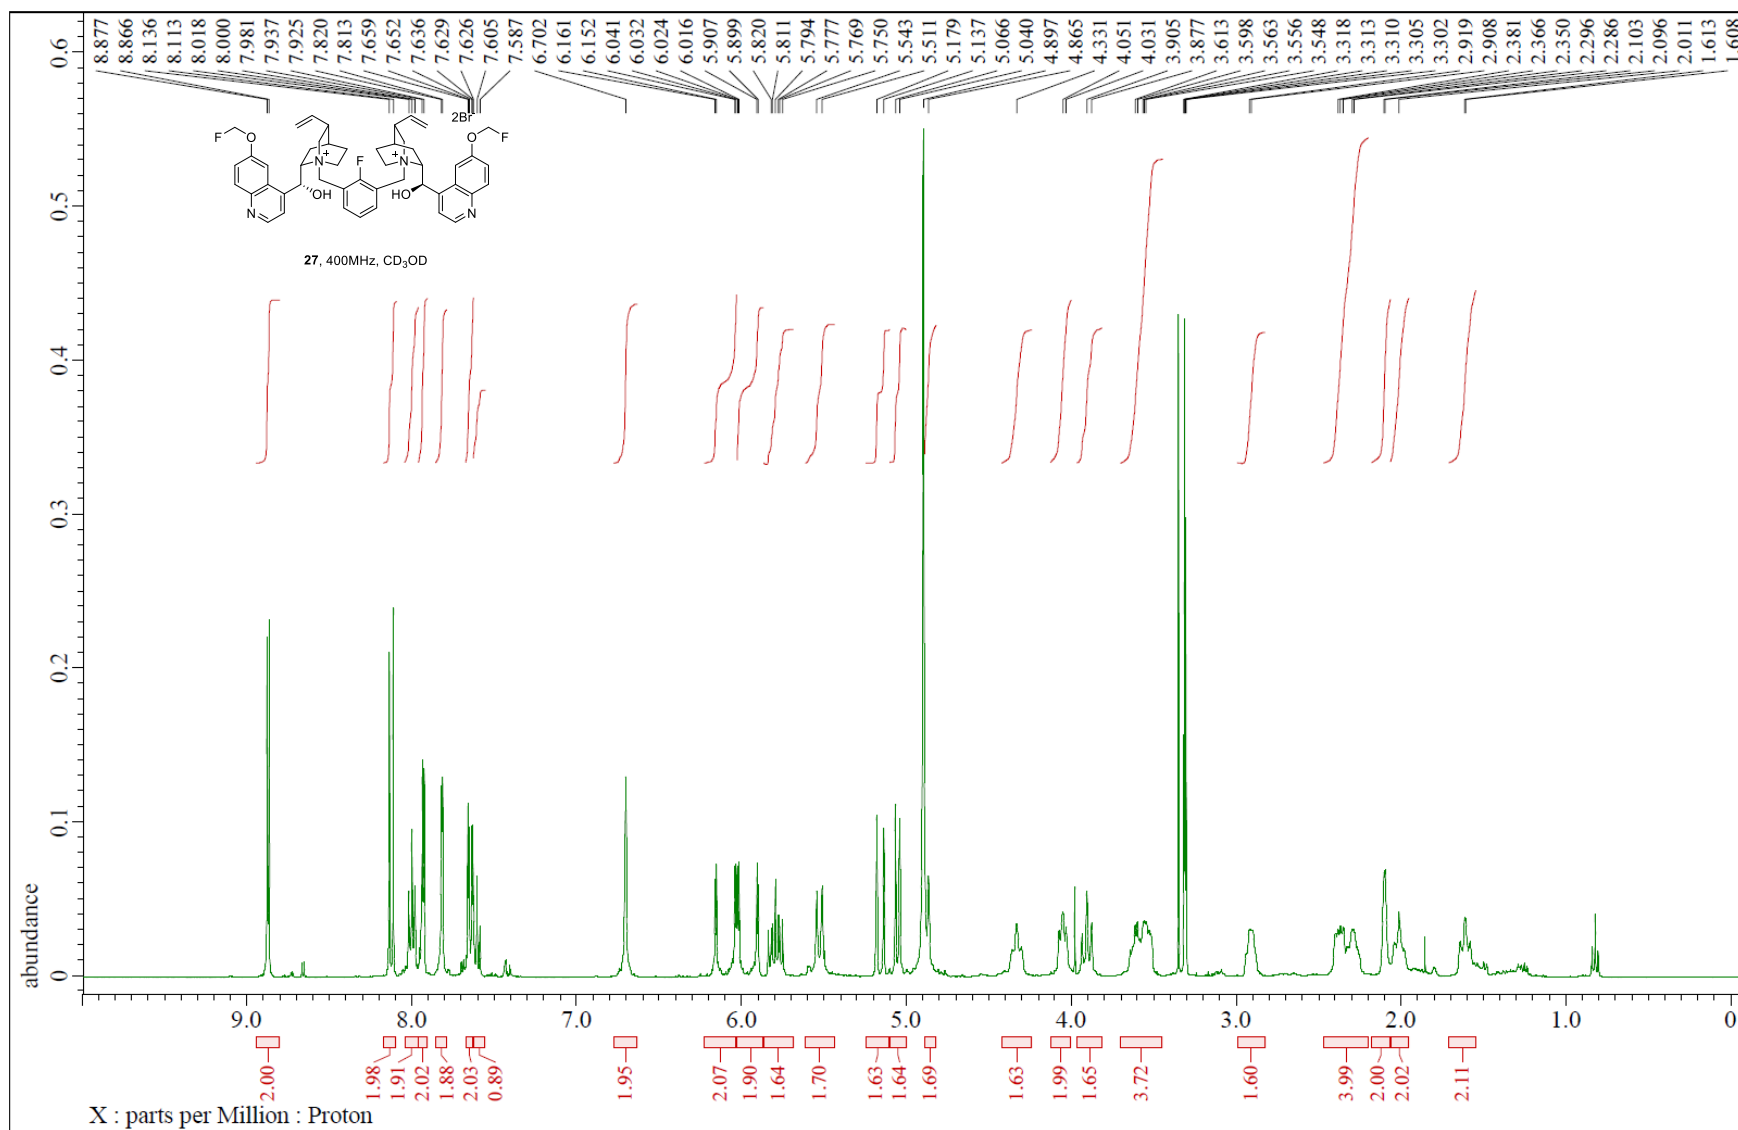

<sup>13</sup>C-NMR of compound **27**

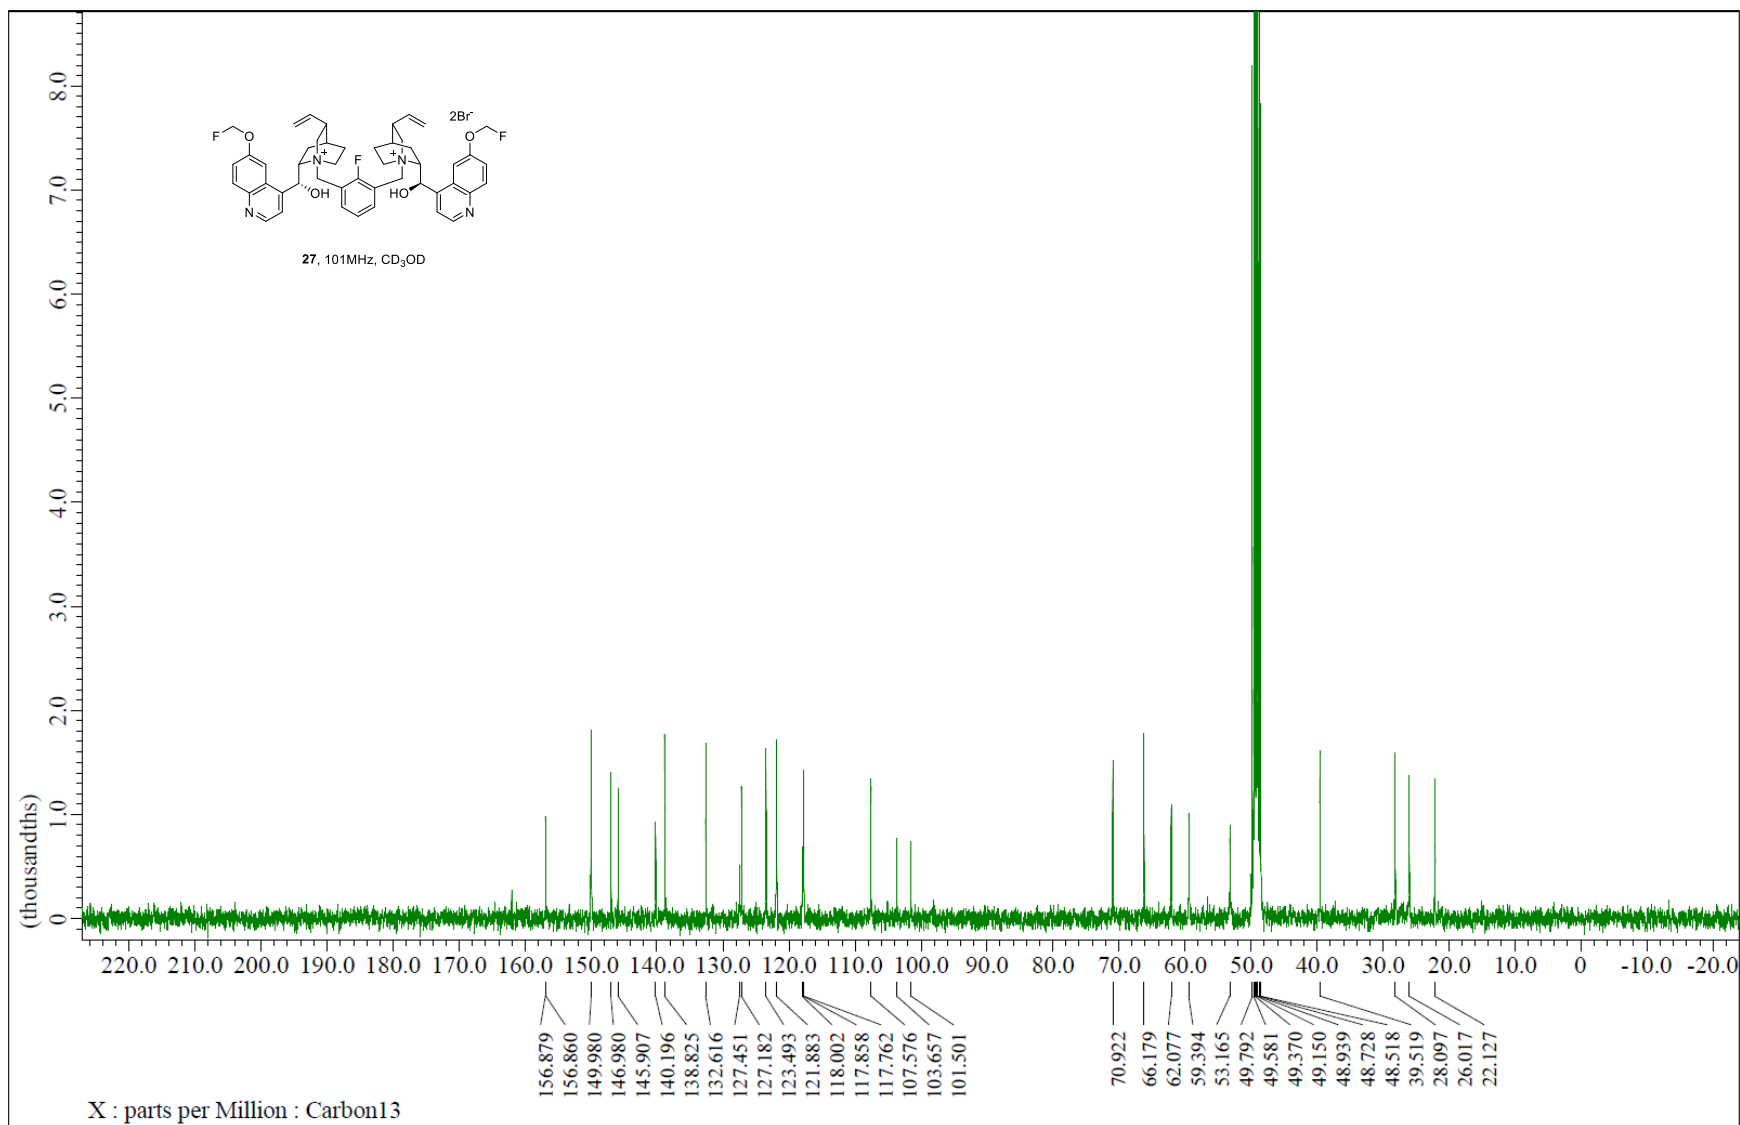

<sup>1</sup>H-NMR of compound 28

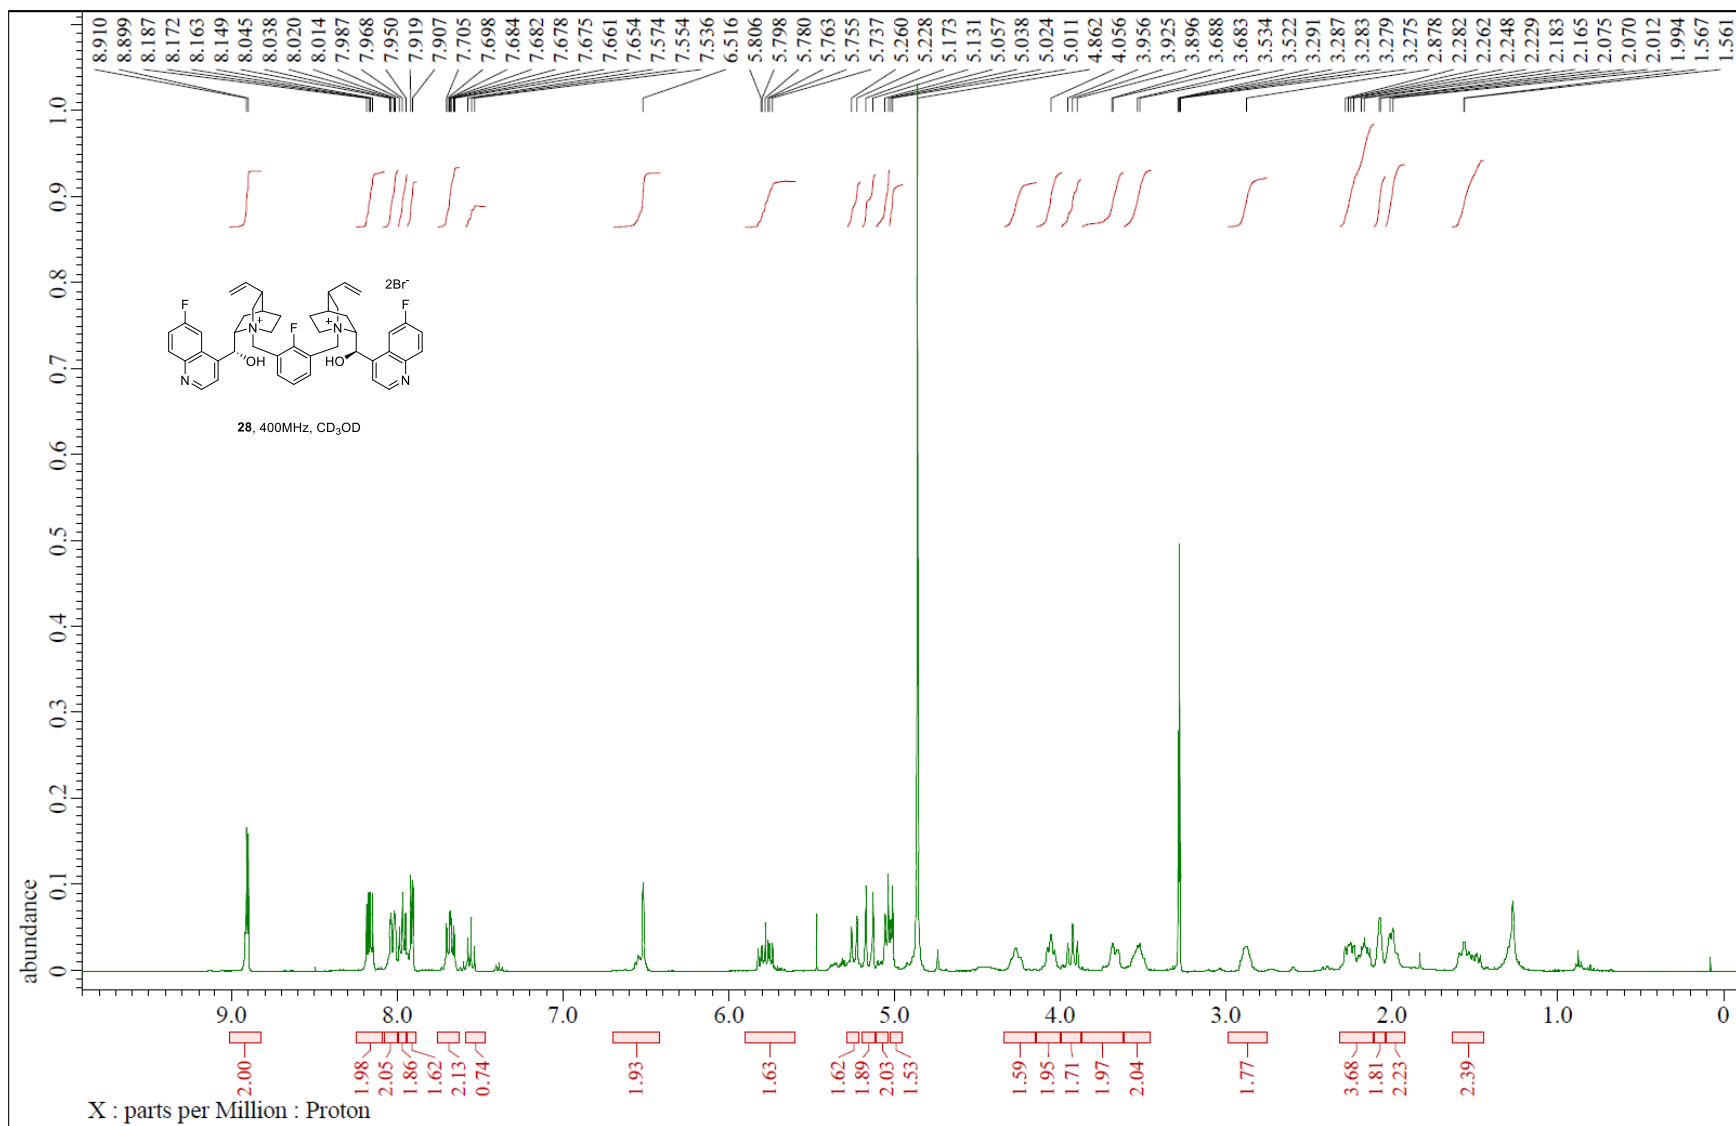

<sup>13</sup>C-NMR of compound **28**

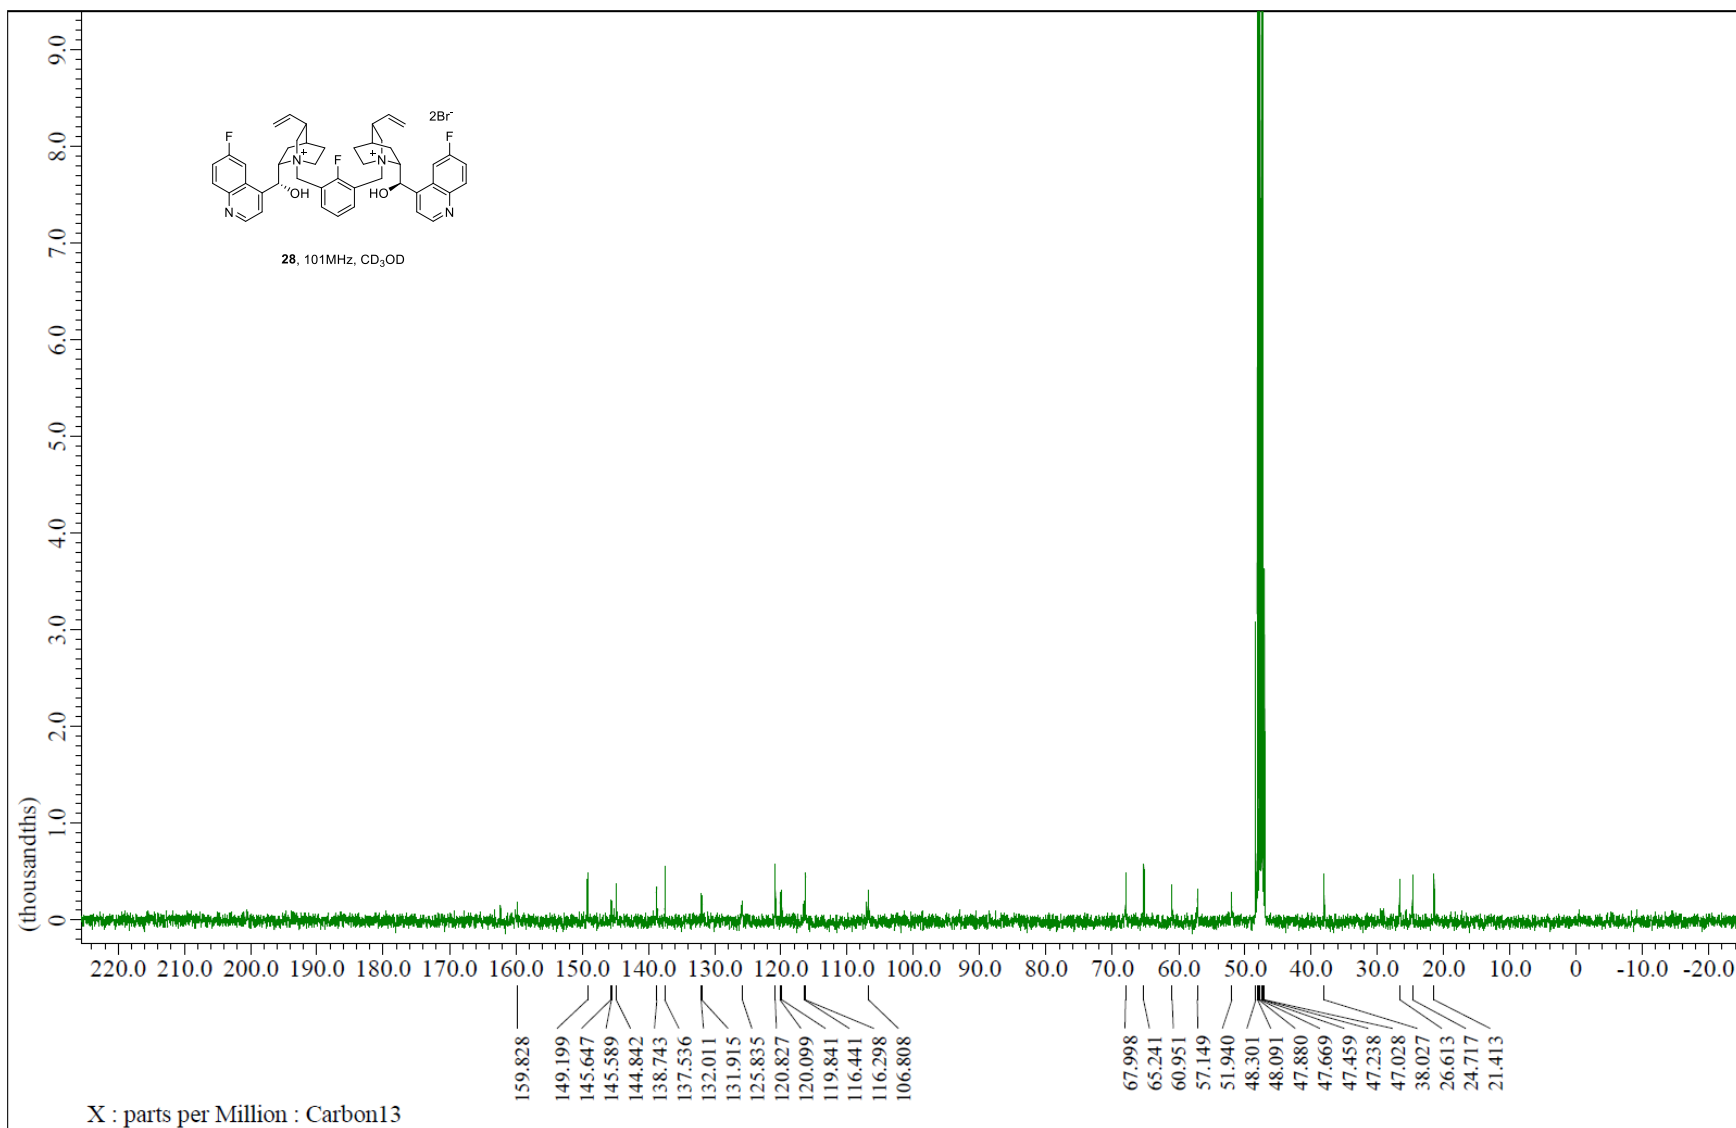

<sup>1</sup>H-NMR of compound 29

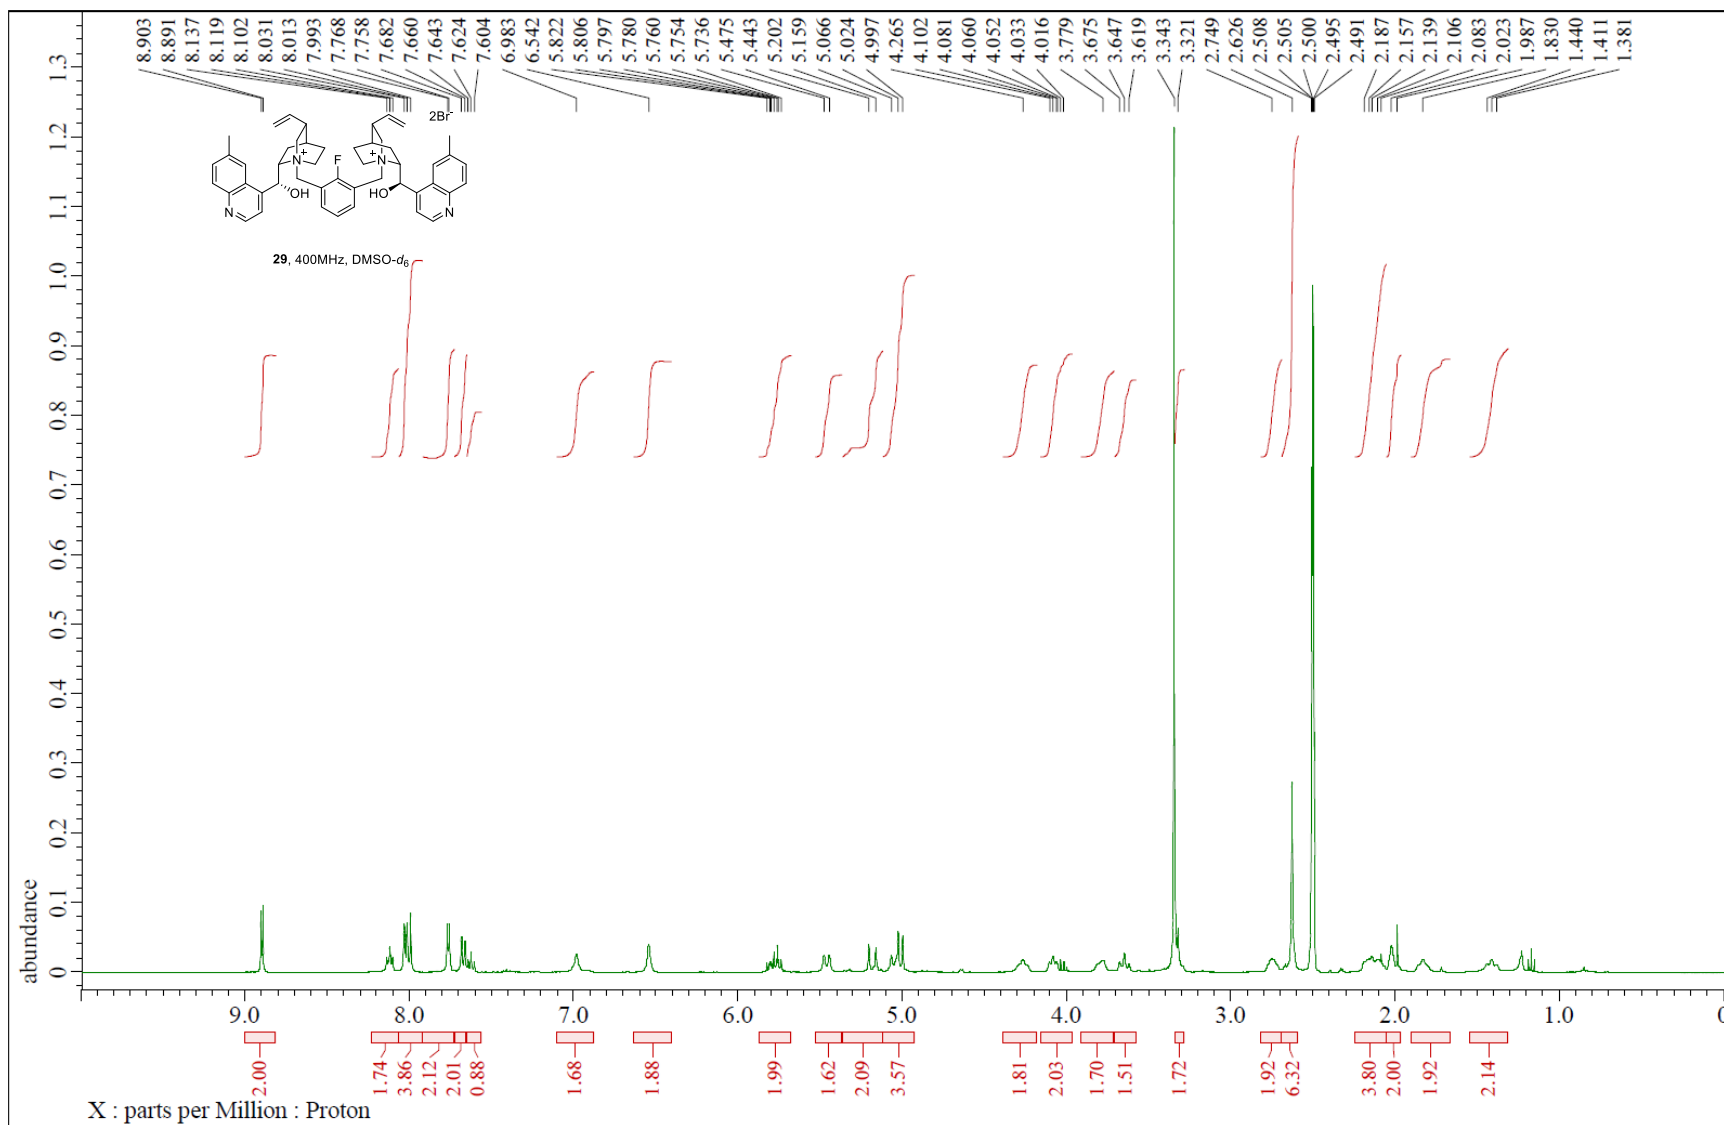

<sup>13</sup>C-NMR of compound **29**

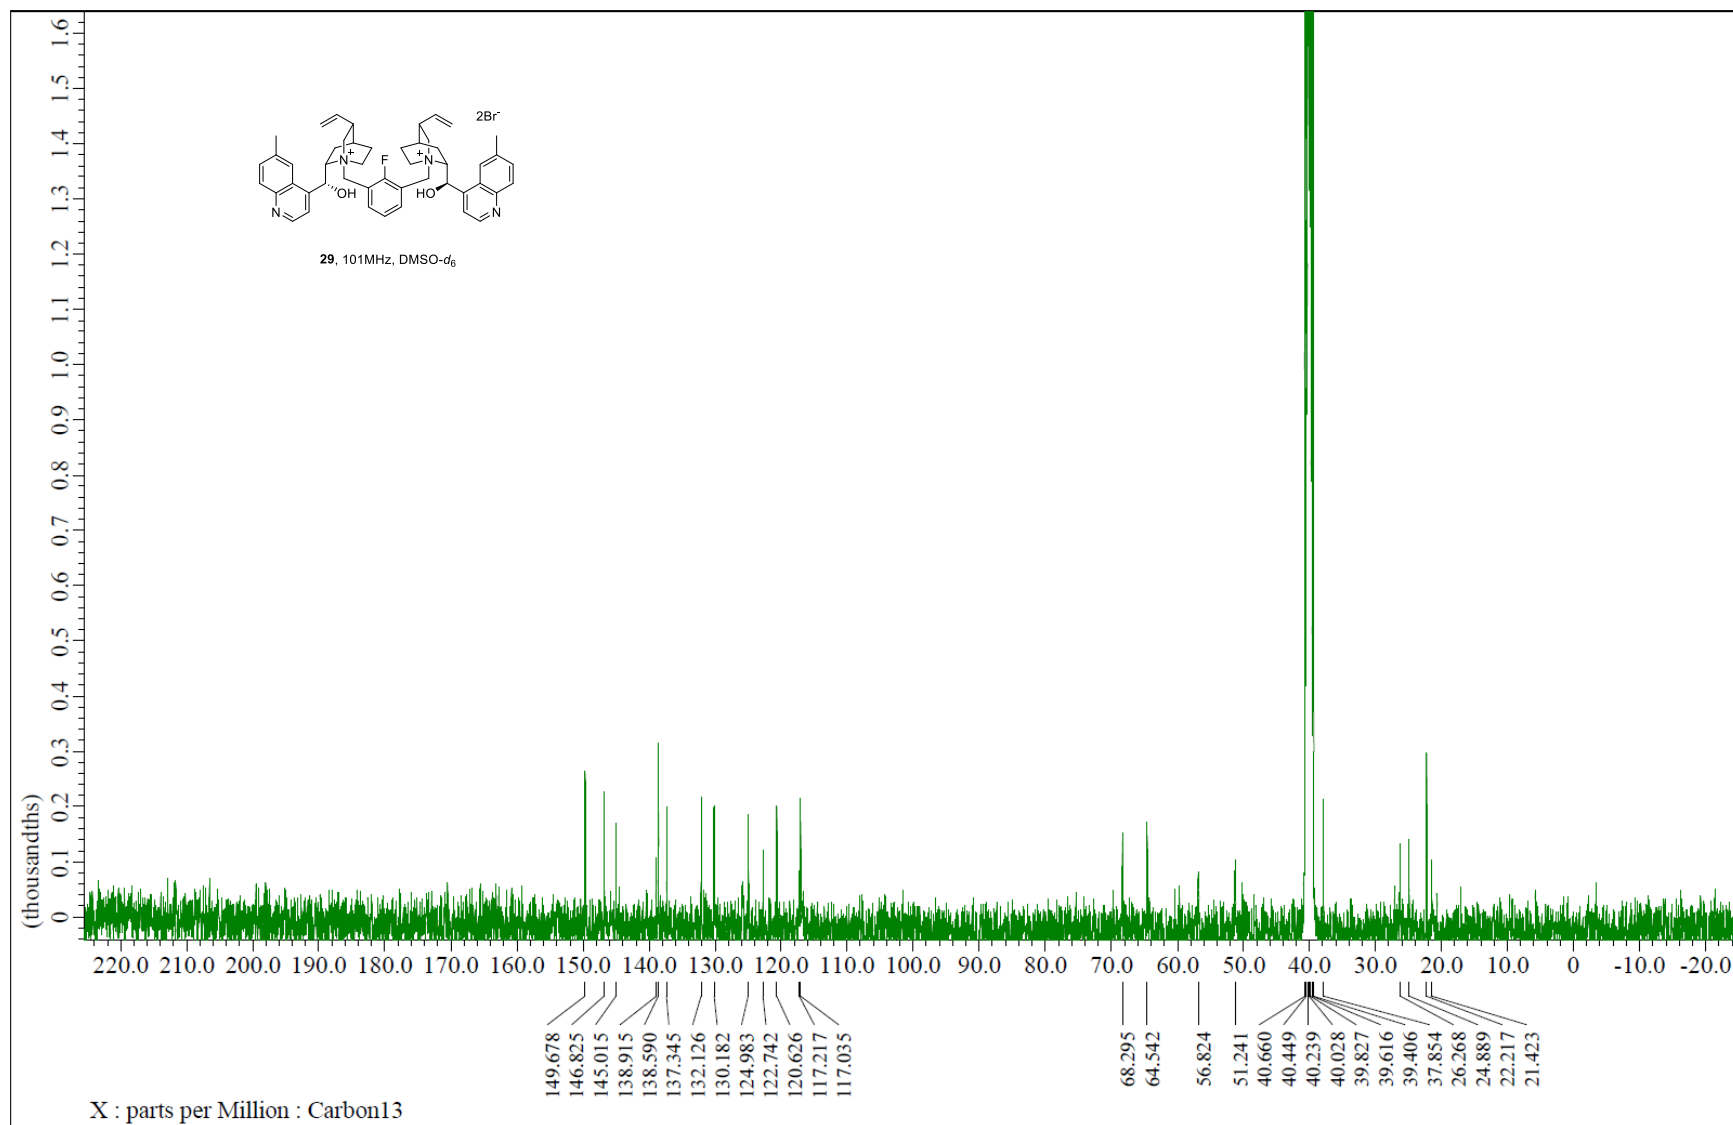



<sup>1</sup>H-NMR of compound S3

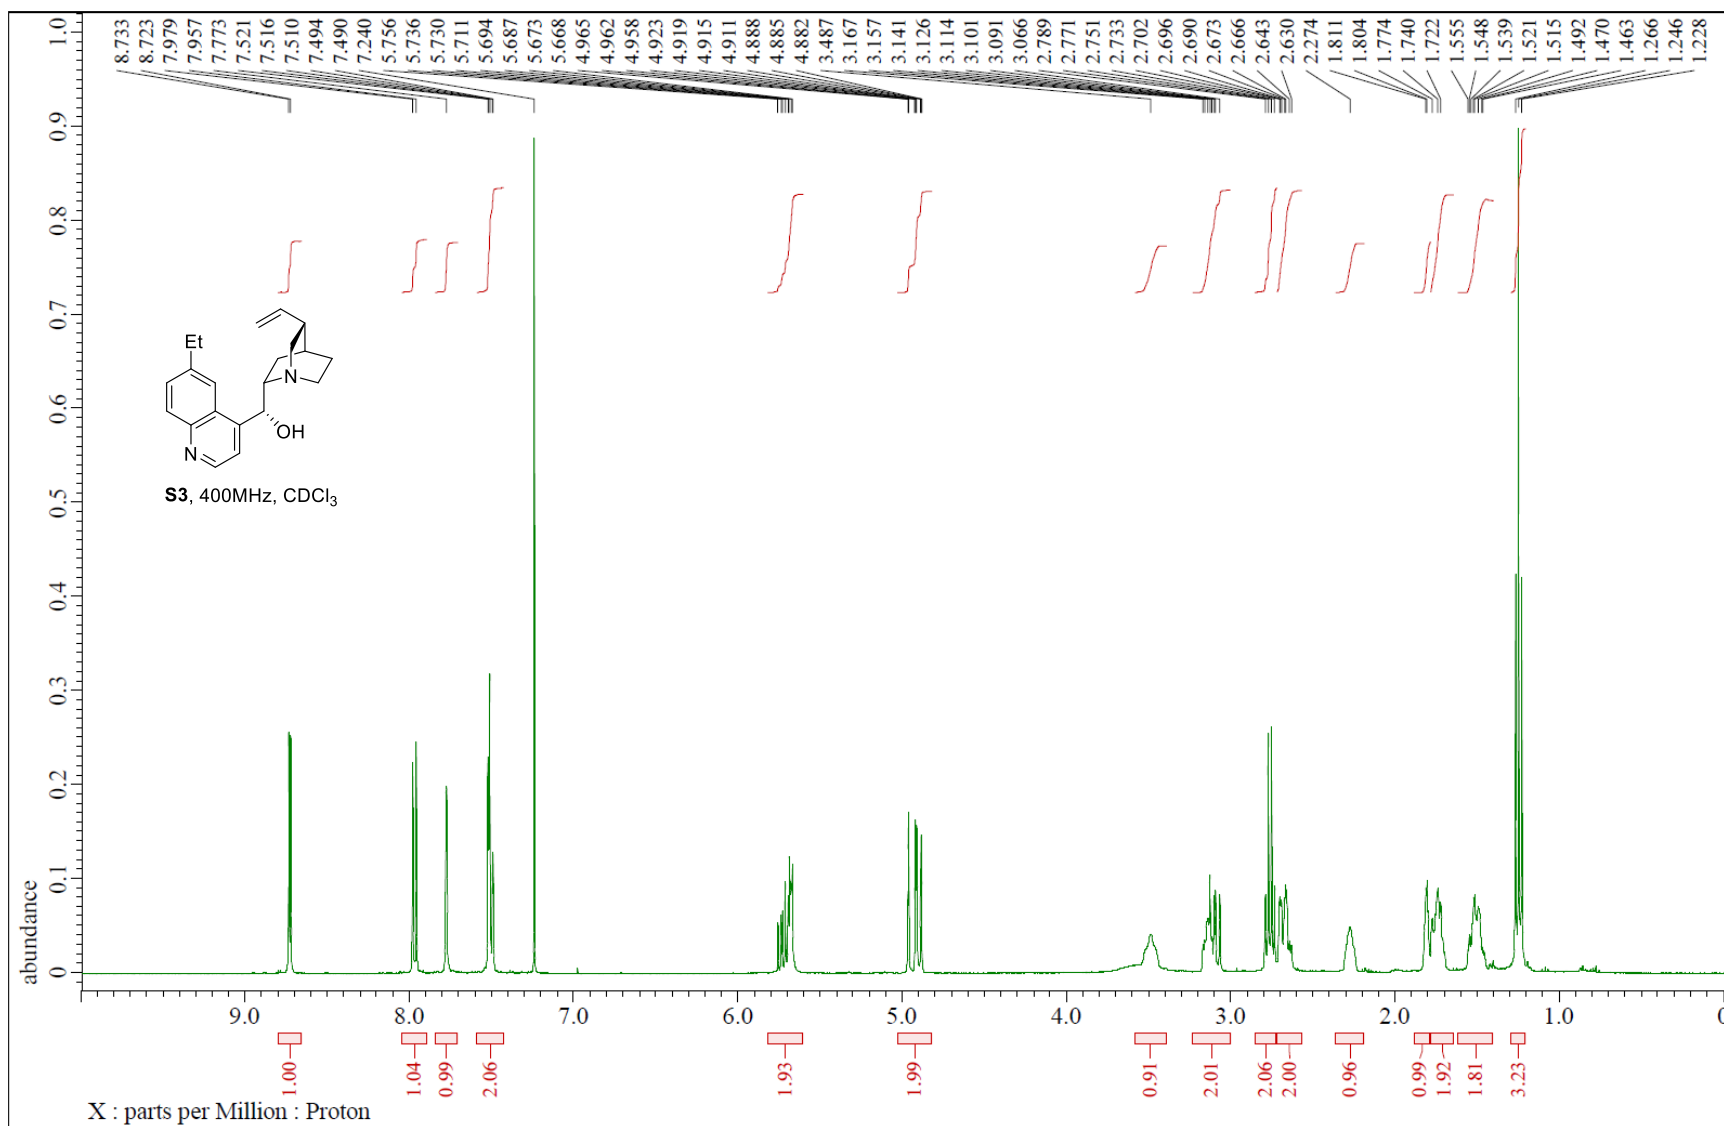

<sup>13</sup>C-NMR of compound **S3**

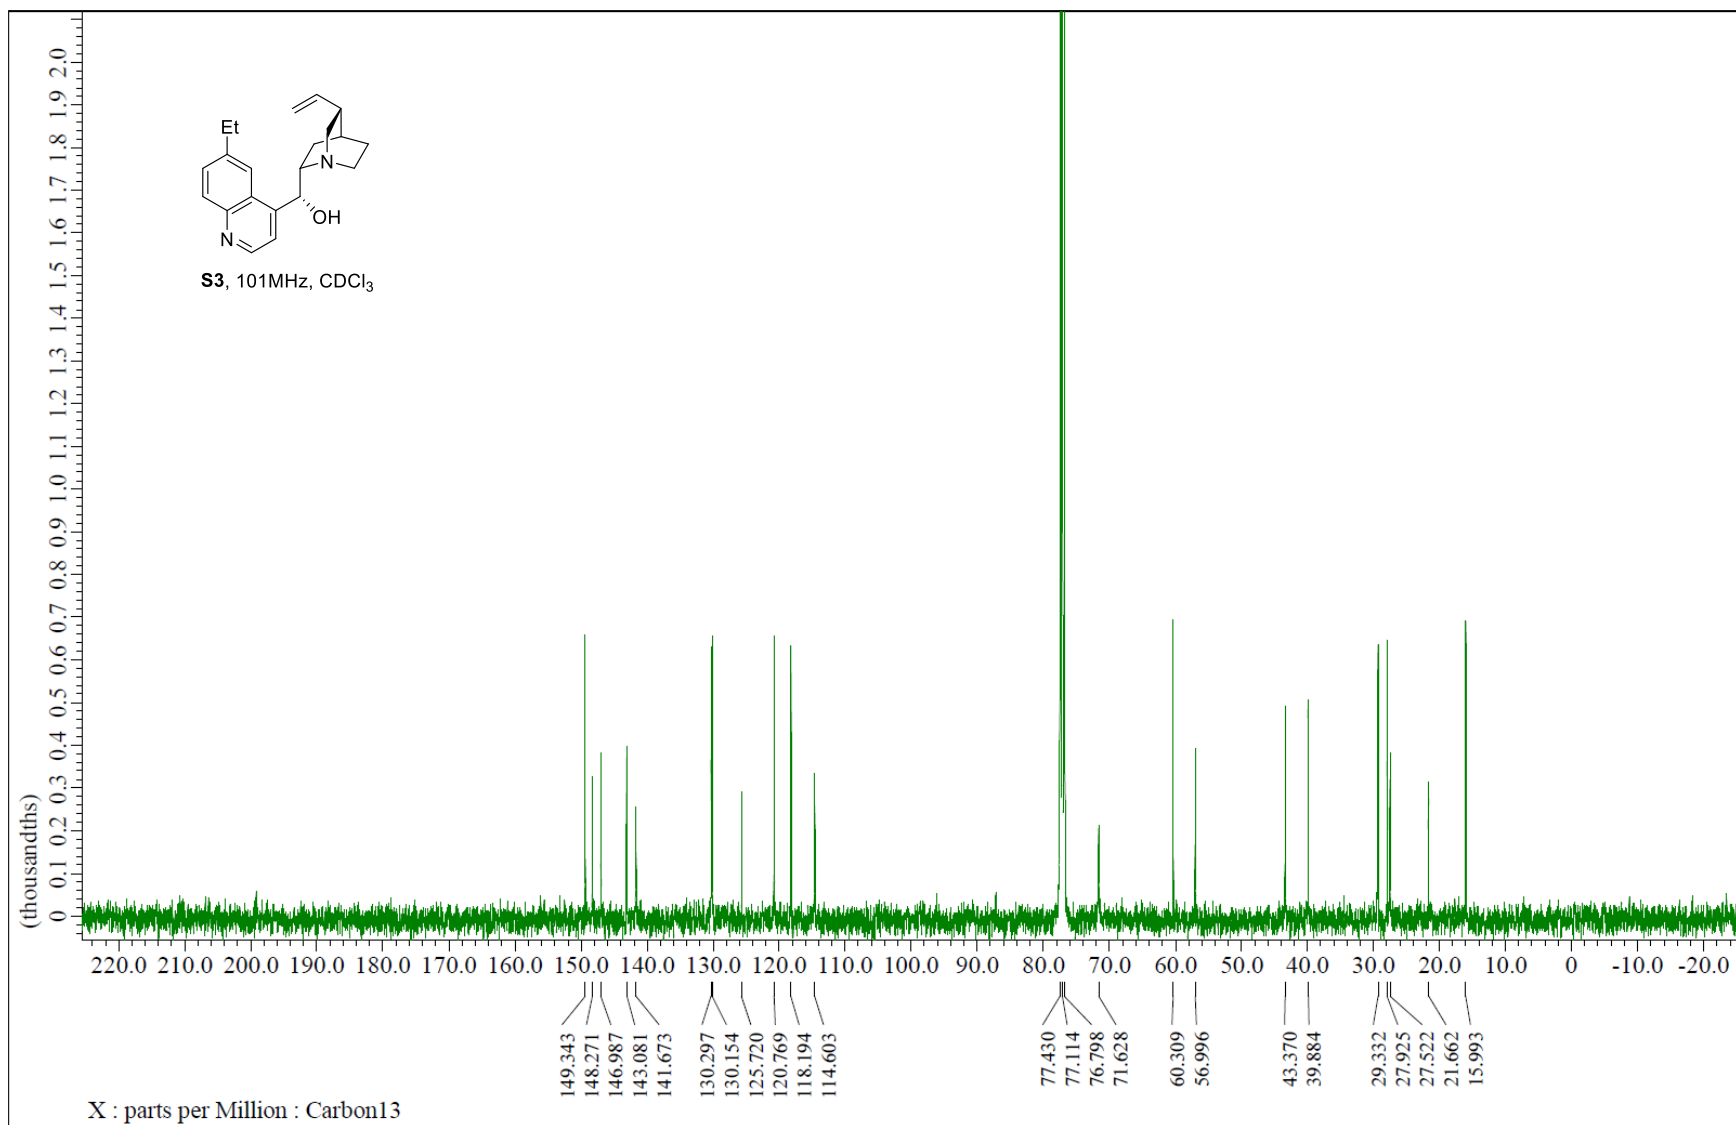

<sup>1</sup>H-NMR of compound 30

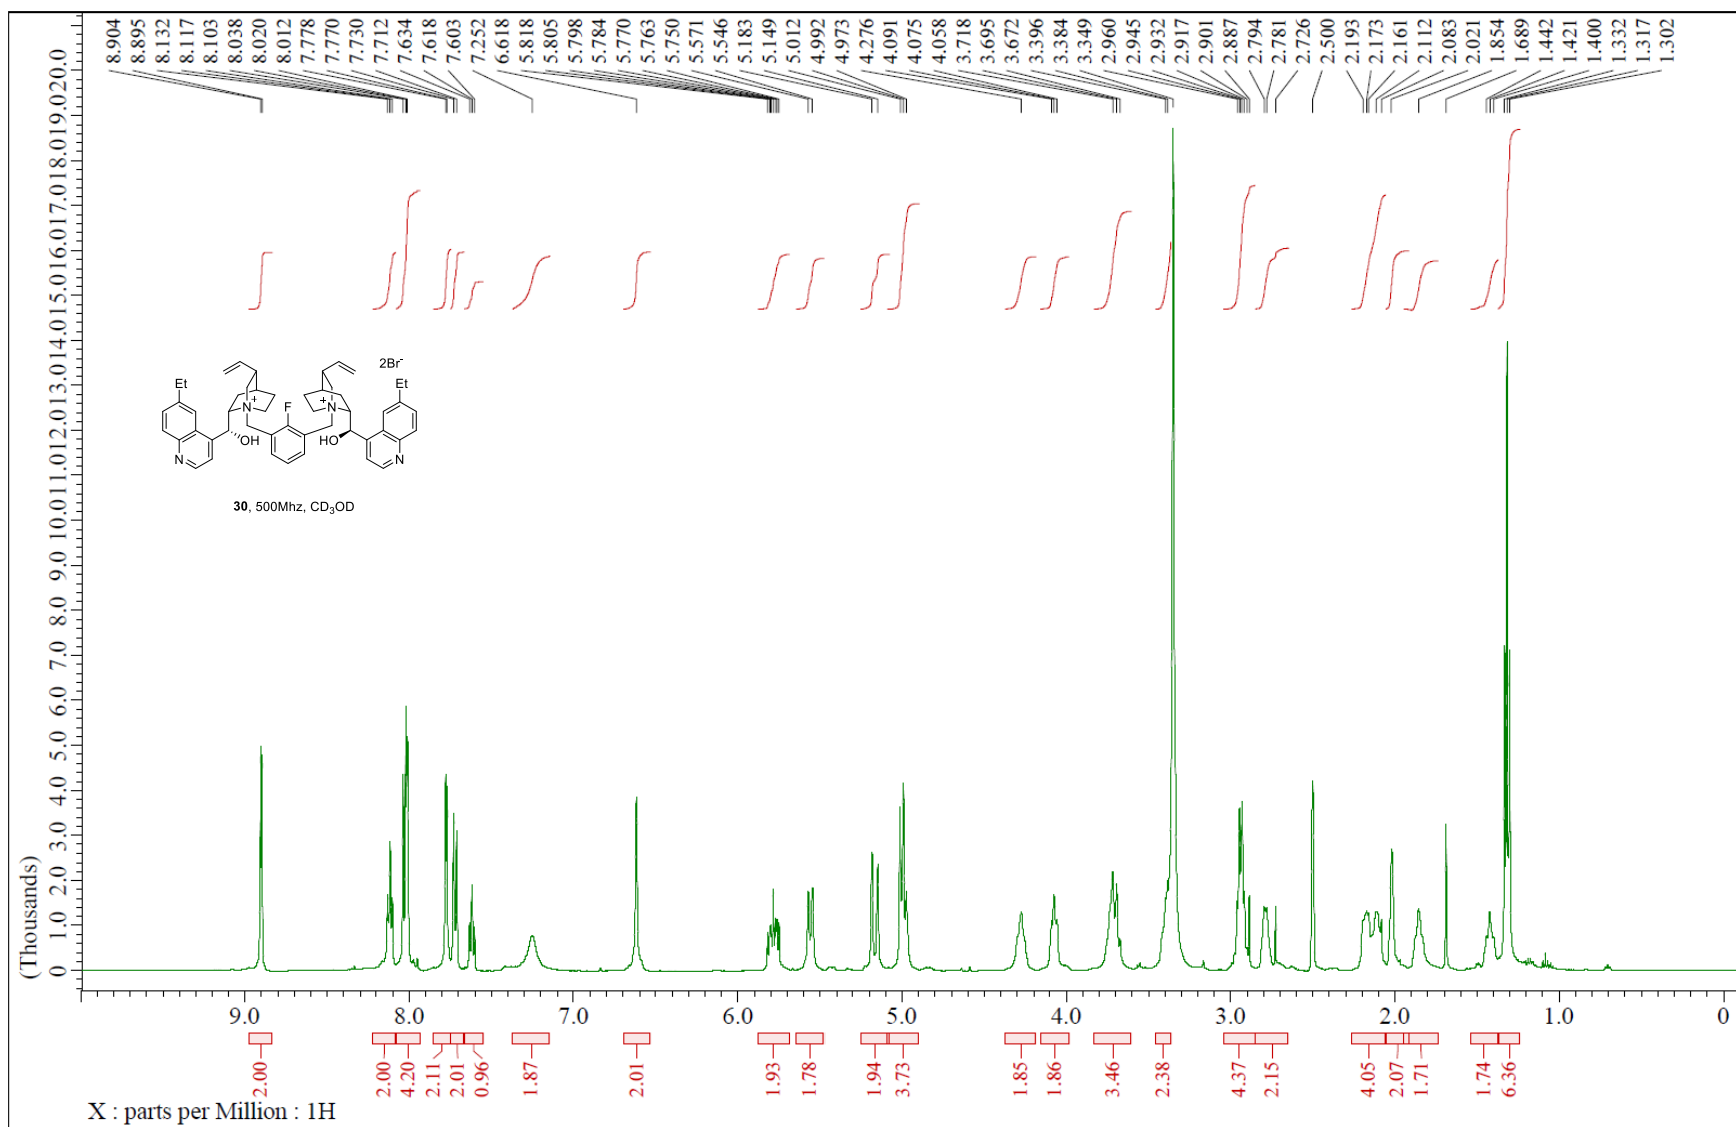

<sup>13</sup>C-NMR of compound **30**

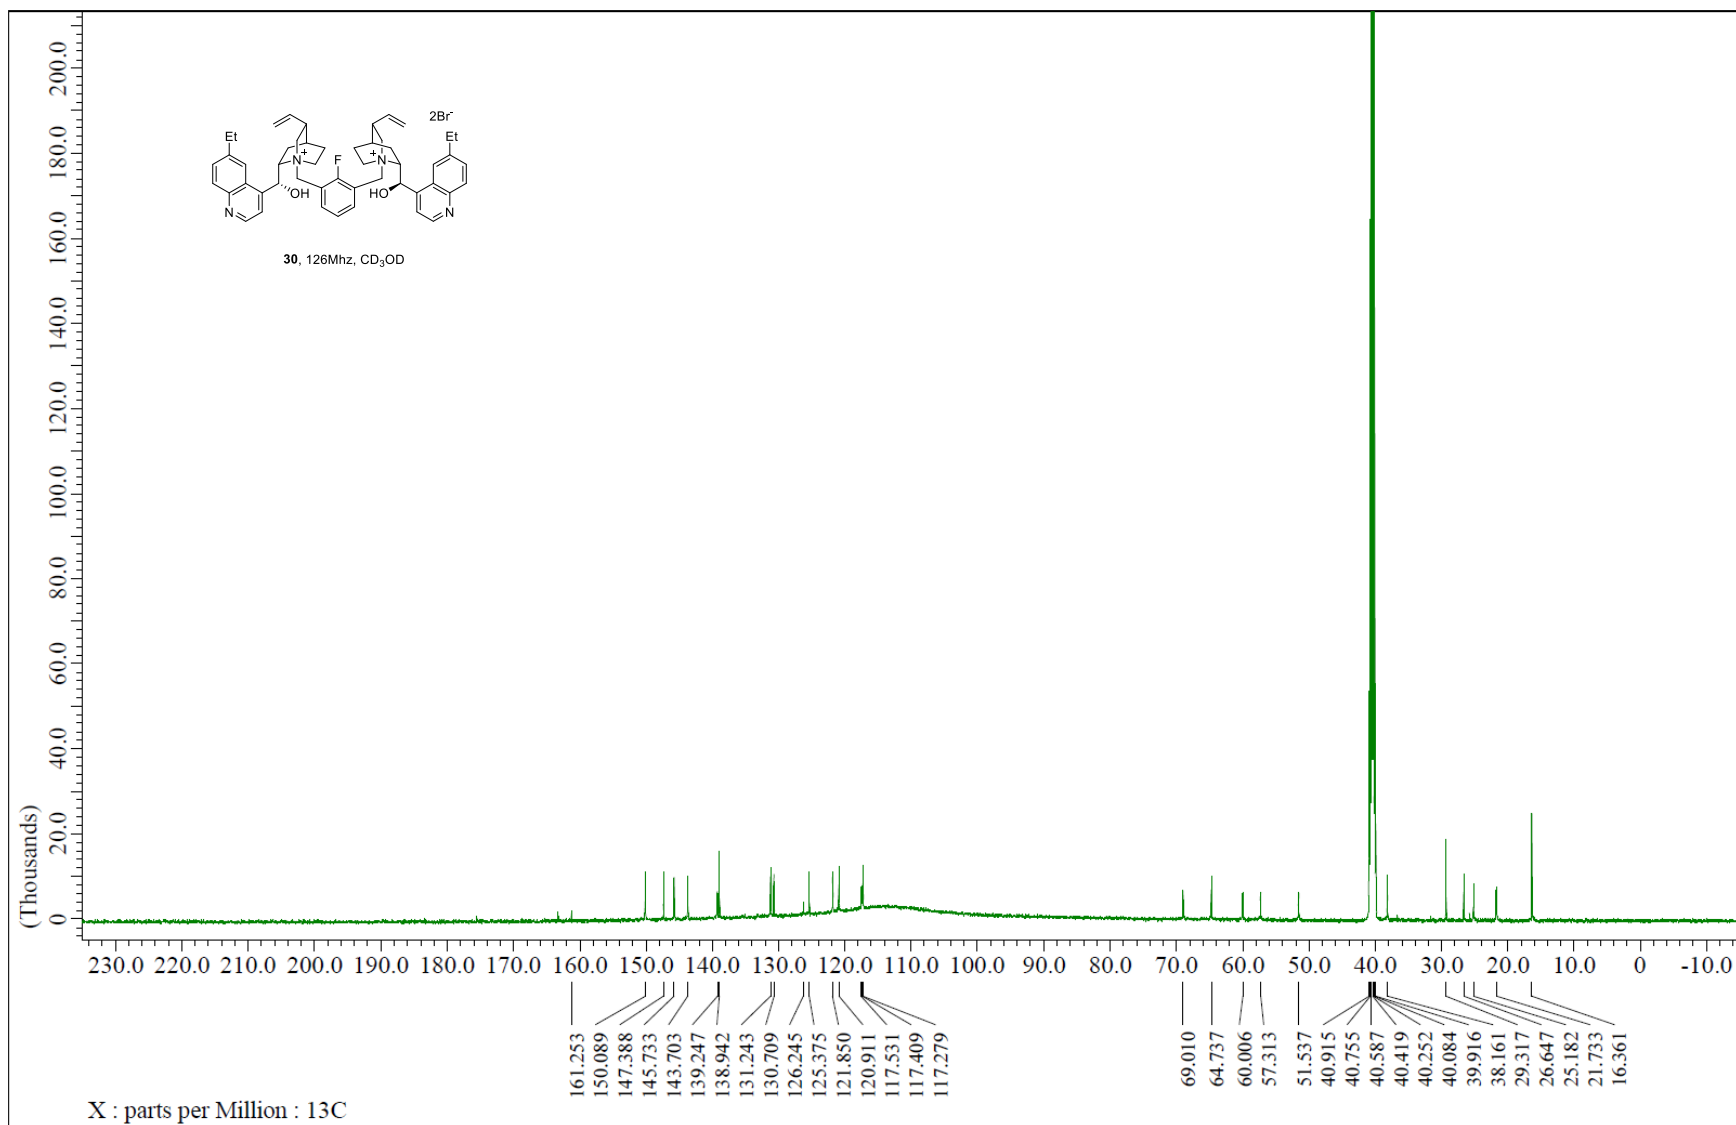

<sup>1</sup>H-NMR of compound 31

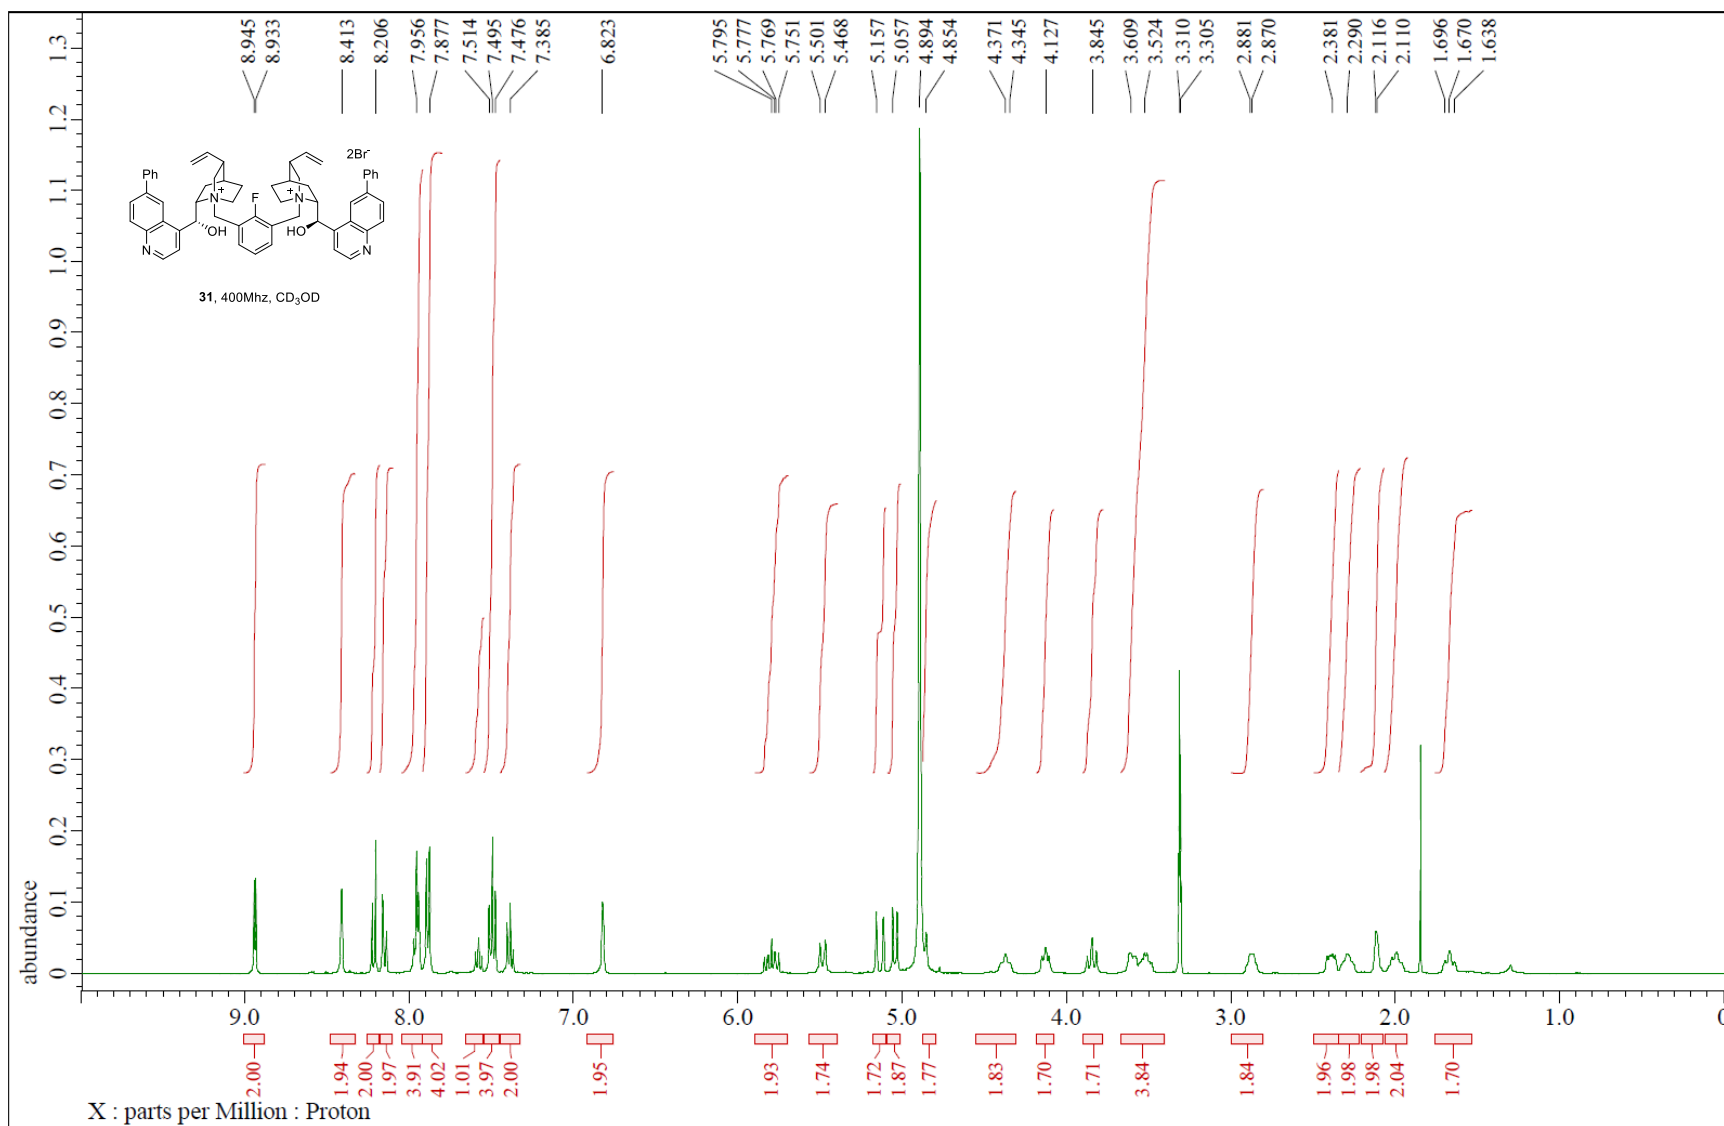

<sup>13</sup>C-NMR of compound **31**

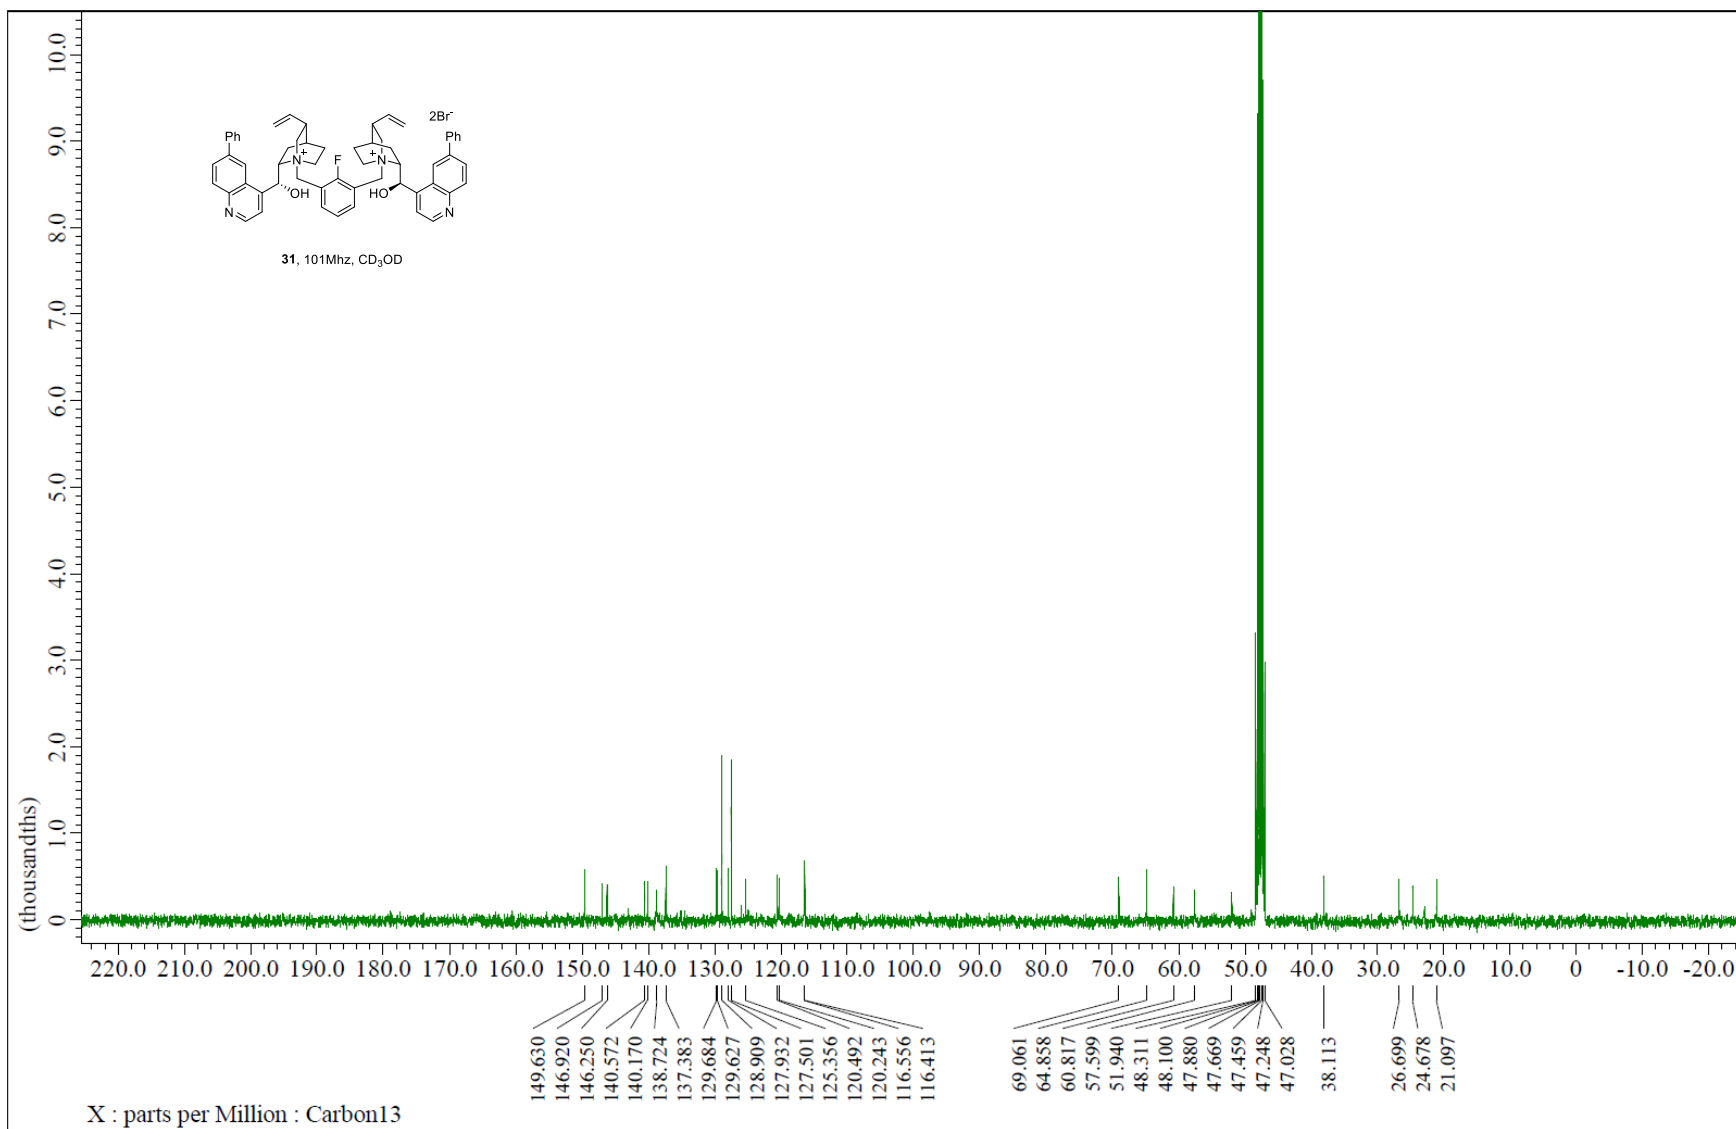

<sup>1</sup>H-NMR of compound **32**

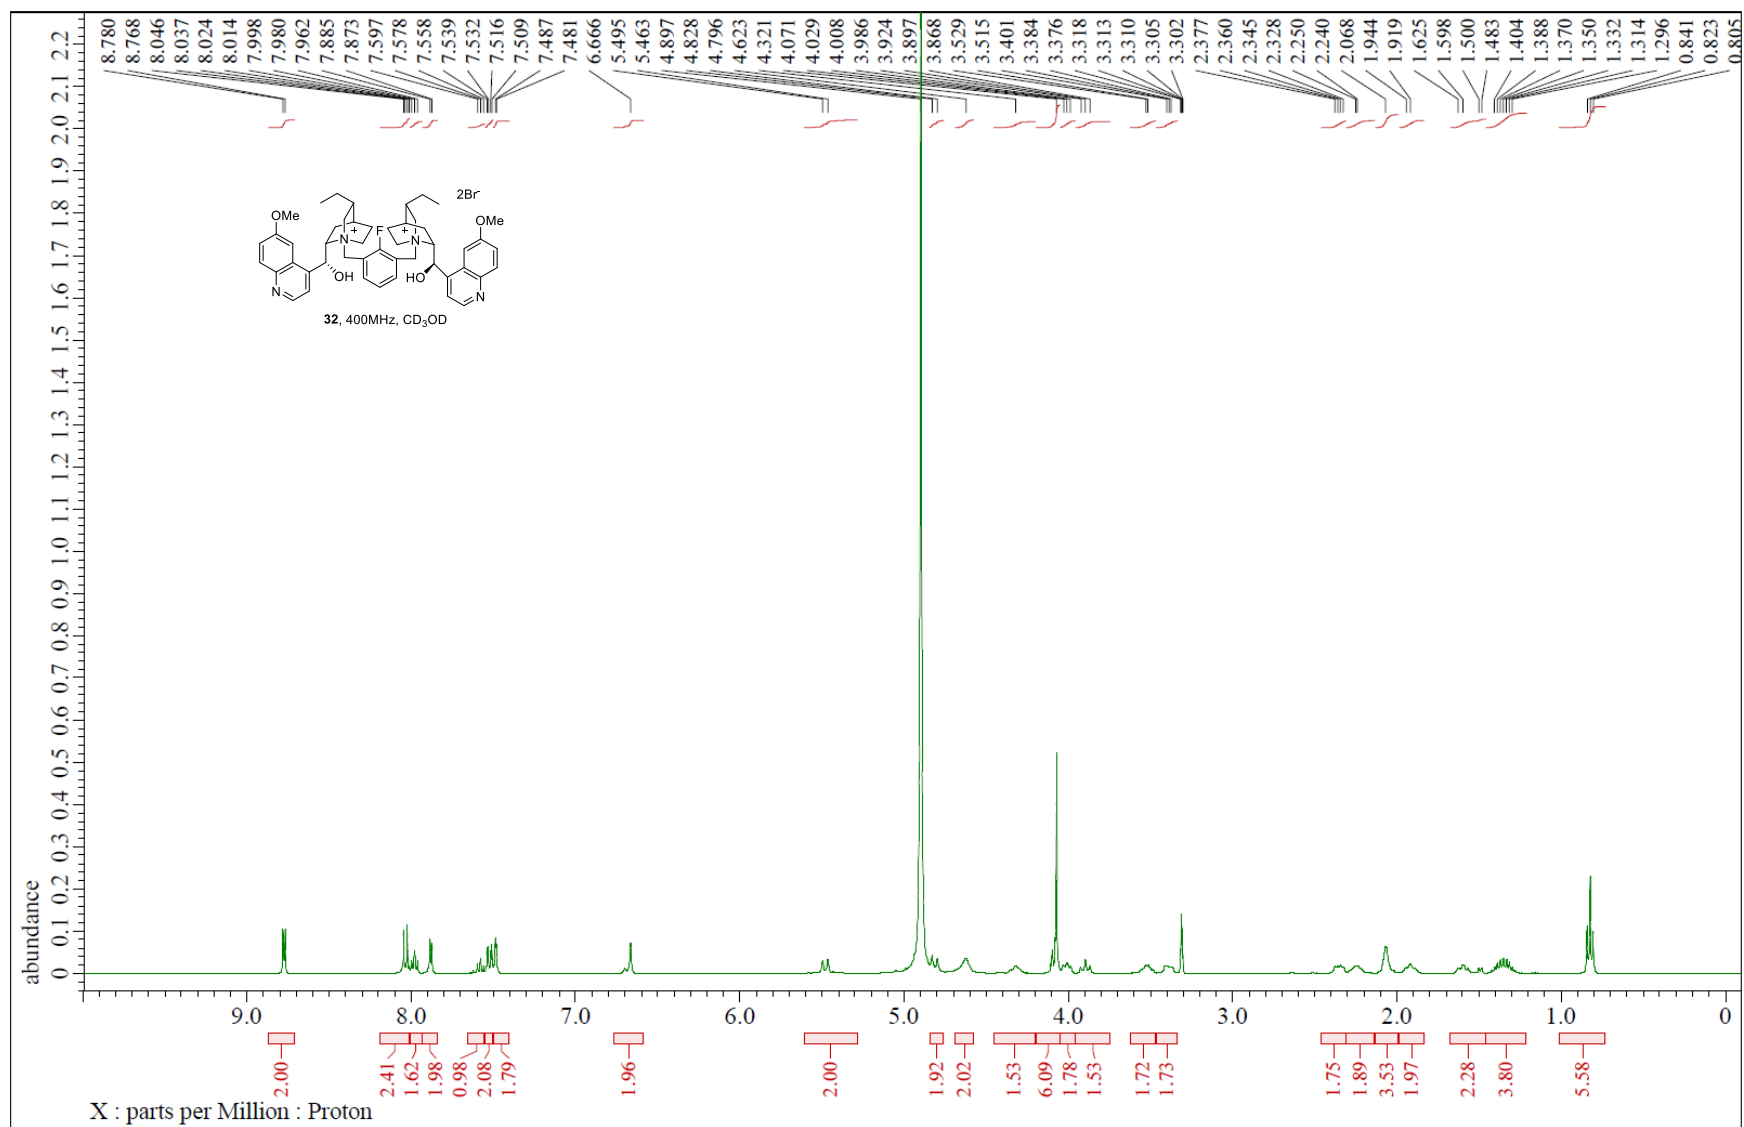

<sup>13</sup>C-NMR of compound **32**

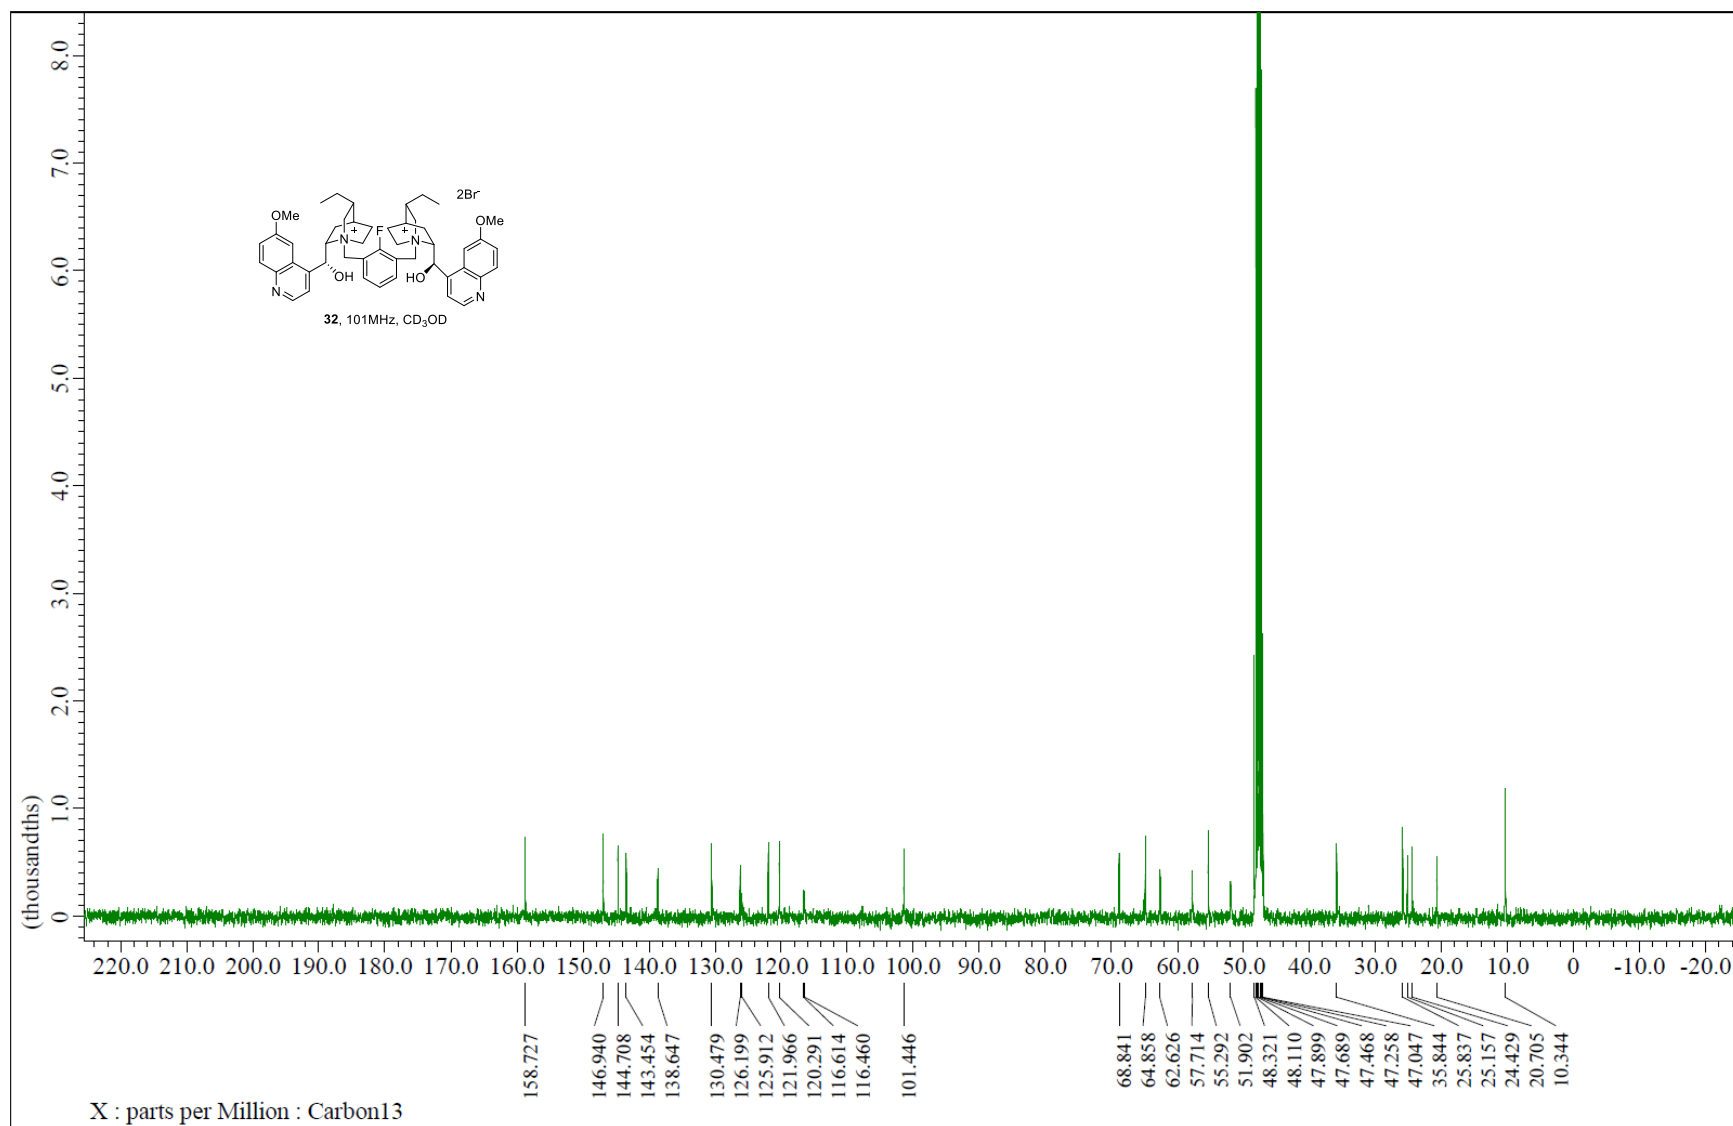



<sup>1</sup>H-NMR of compound 33

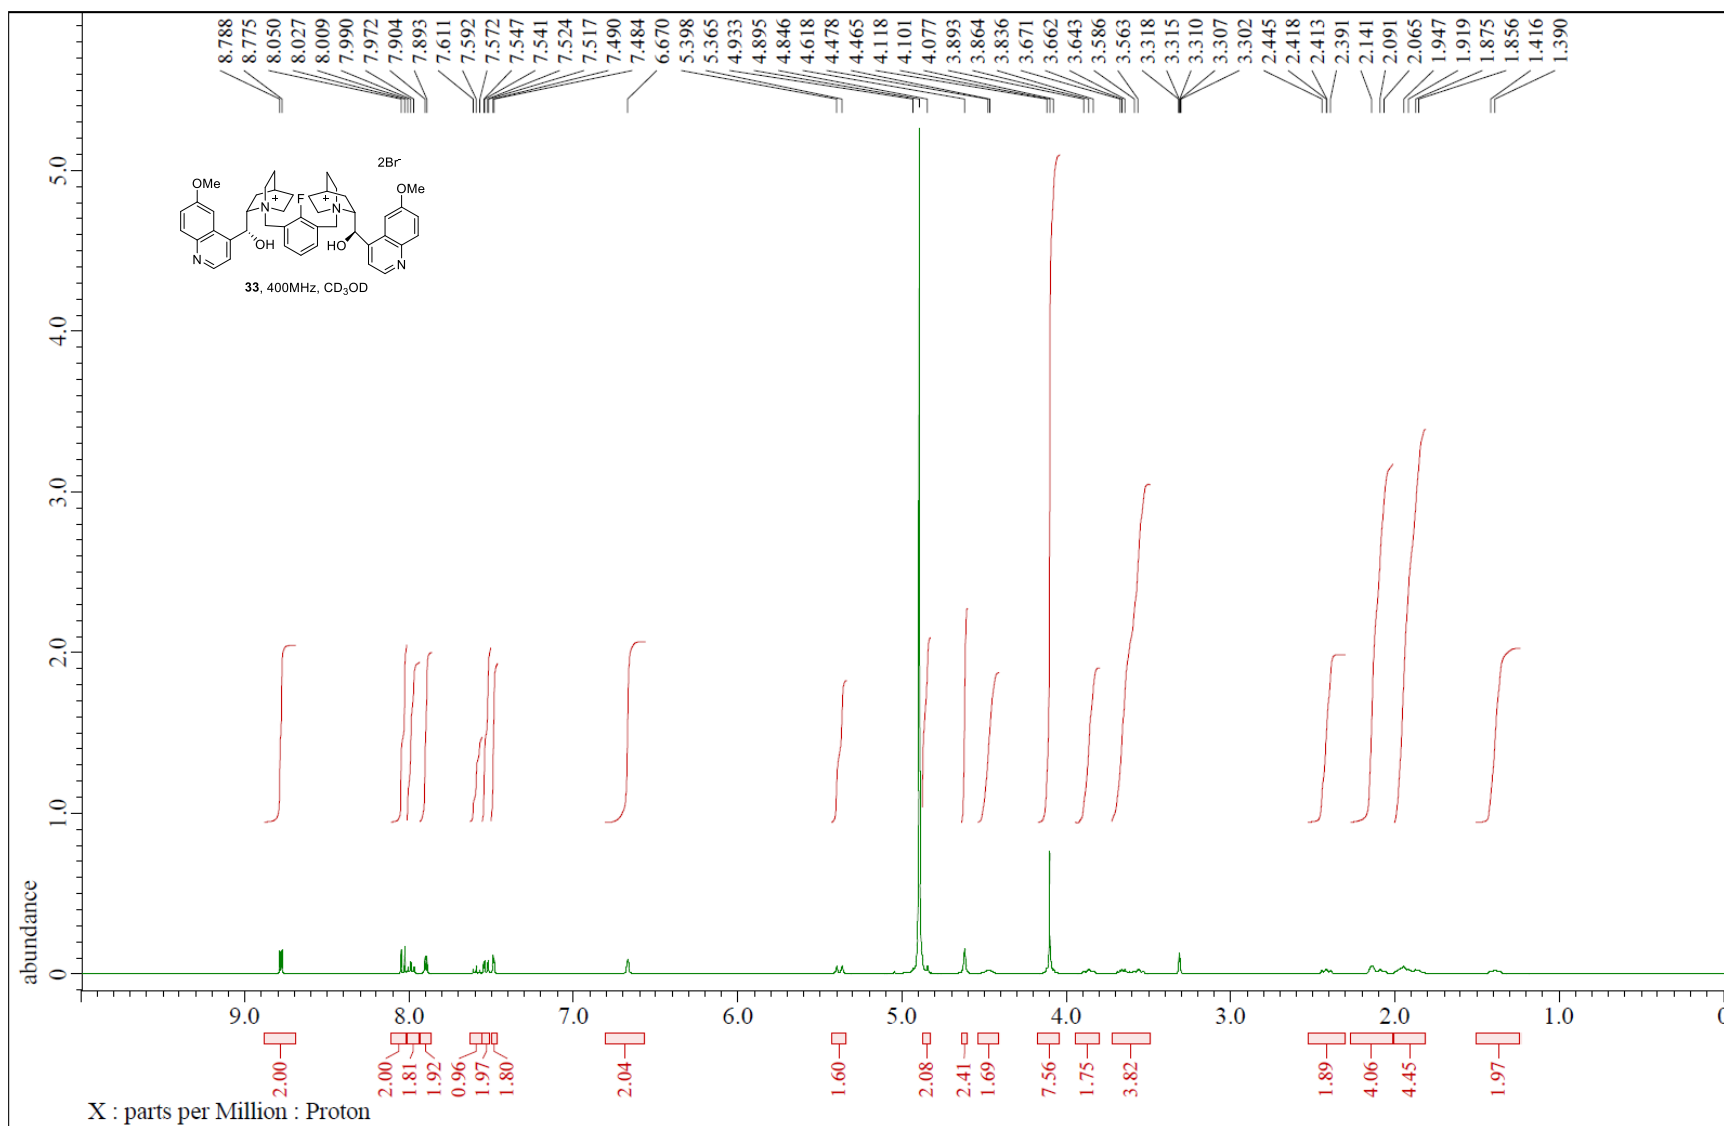

<sup>13</sup>C-NMR of compound **33**

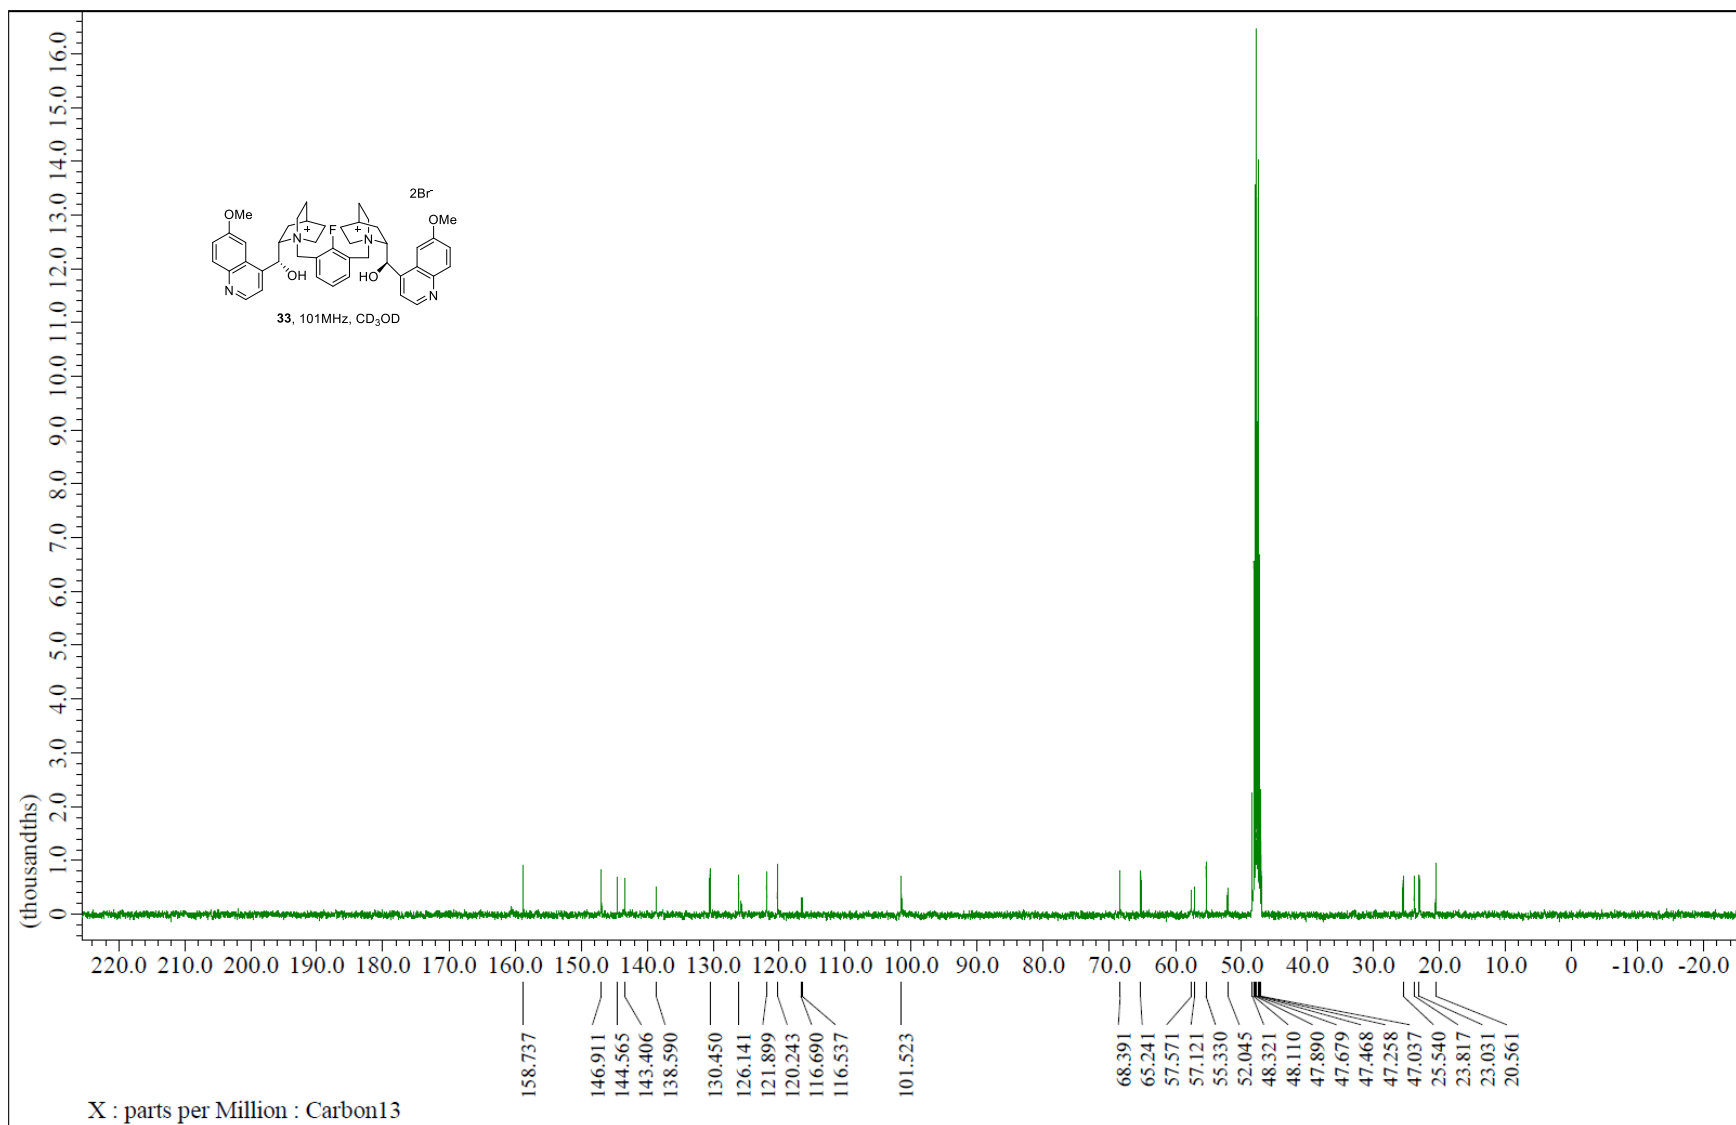

<sup>1</sup>H-NMR of compound 34

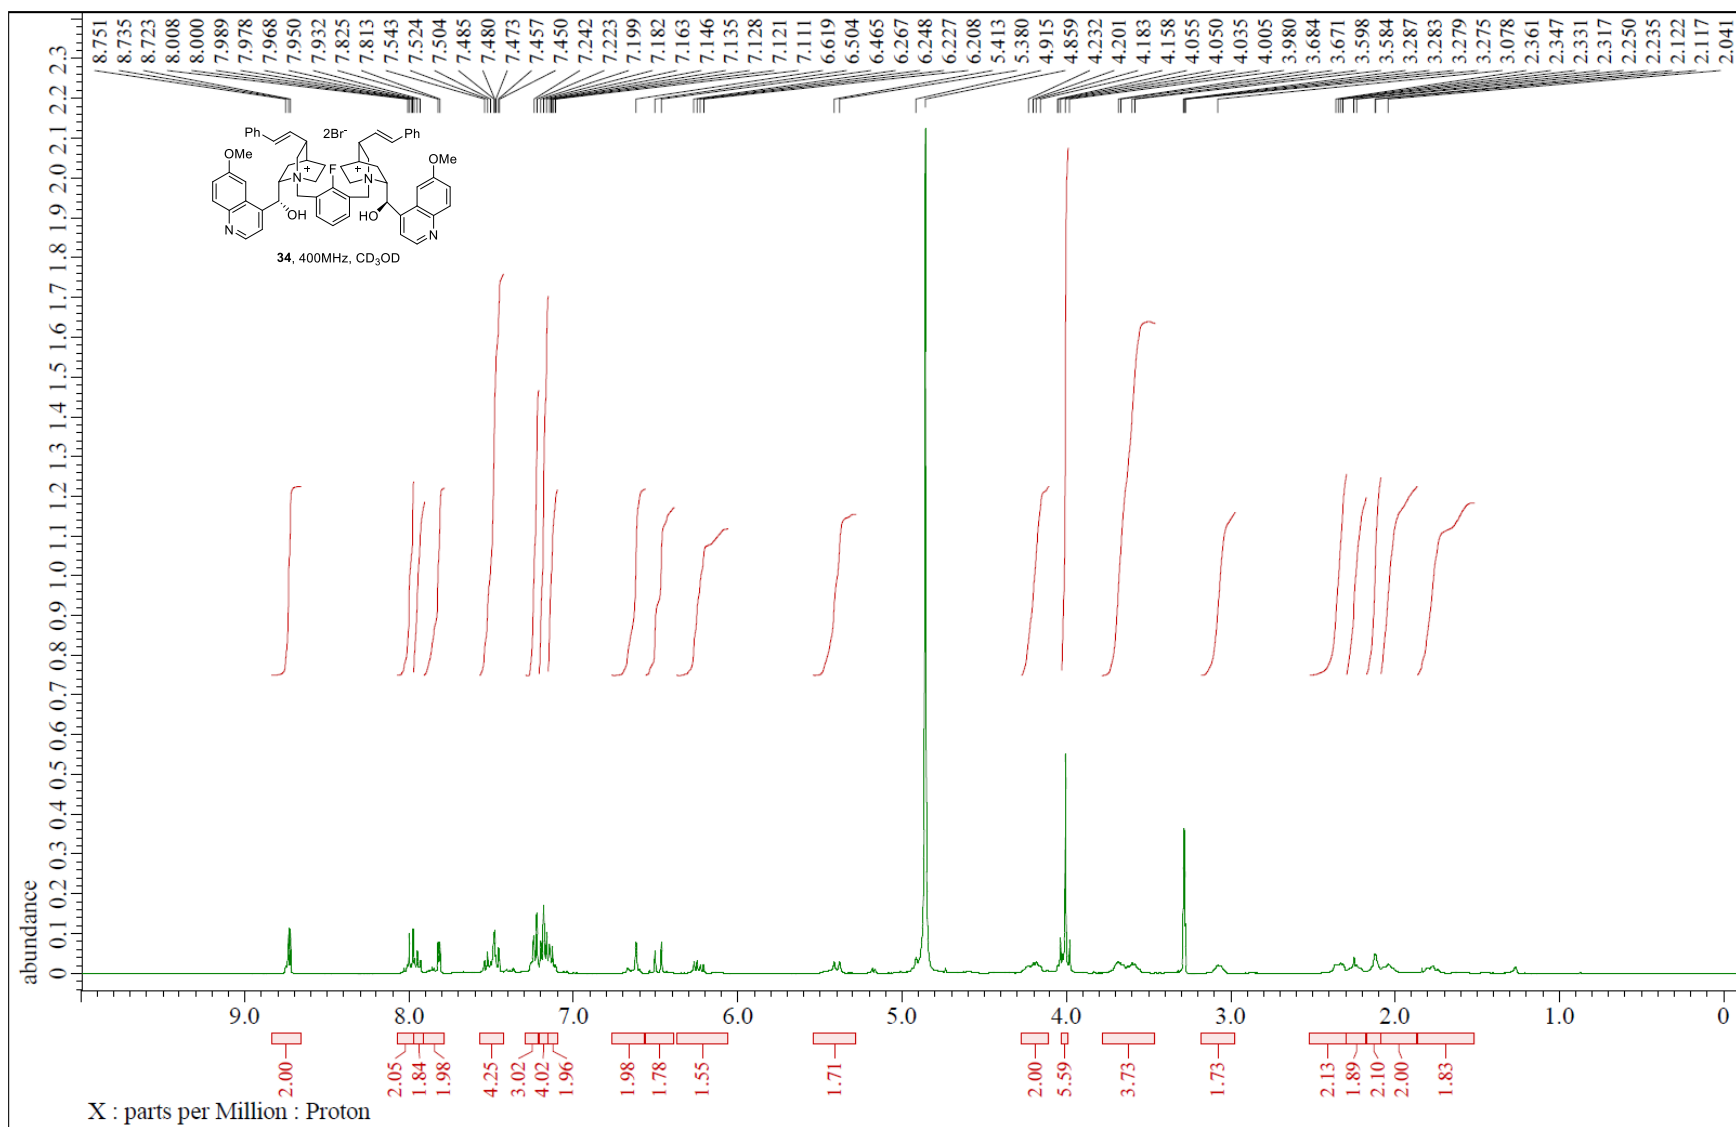

<sup>13</sup>C-NMR of compound **34**

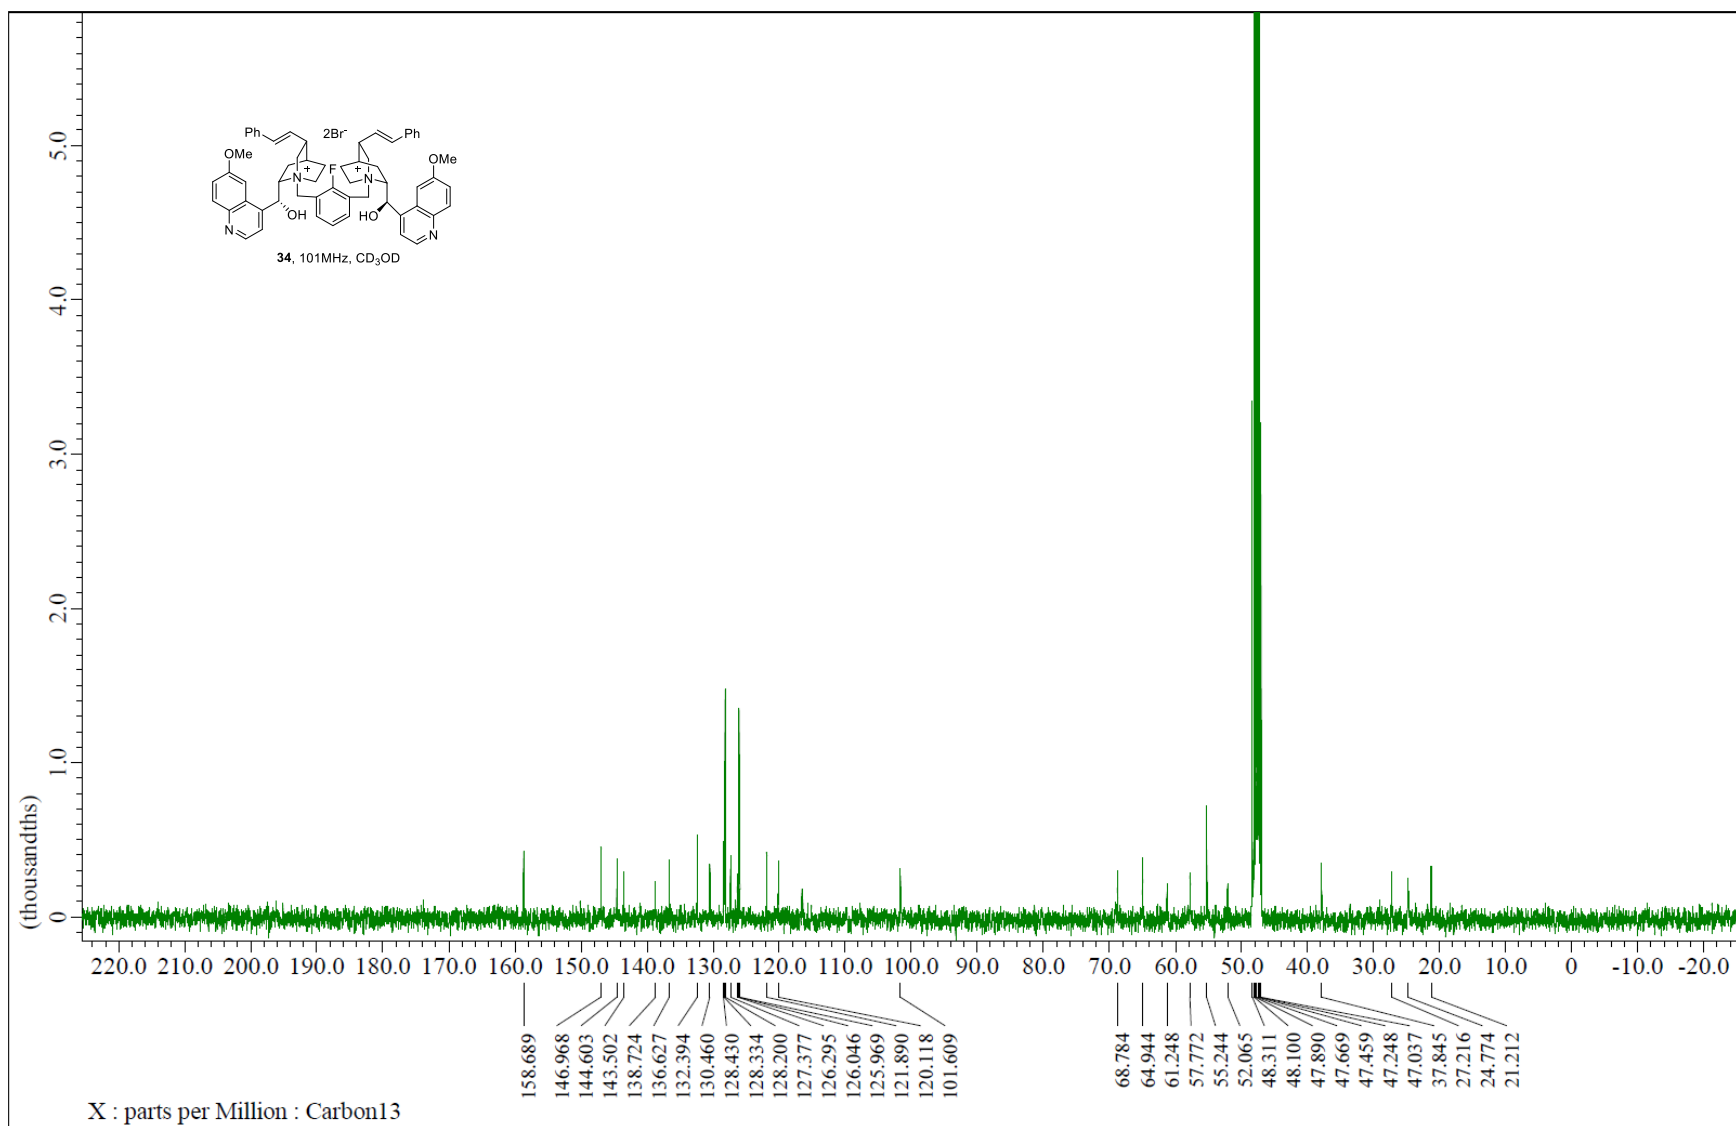

<sup>1</sup>H-NMR of compound 35

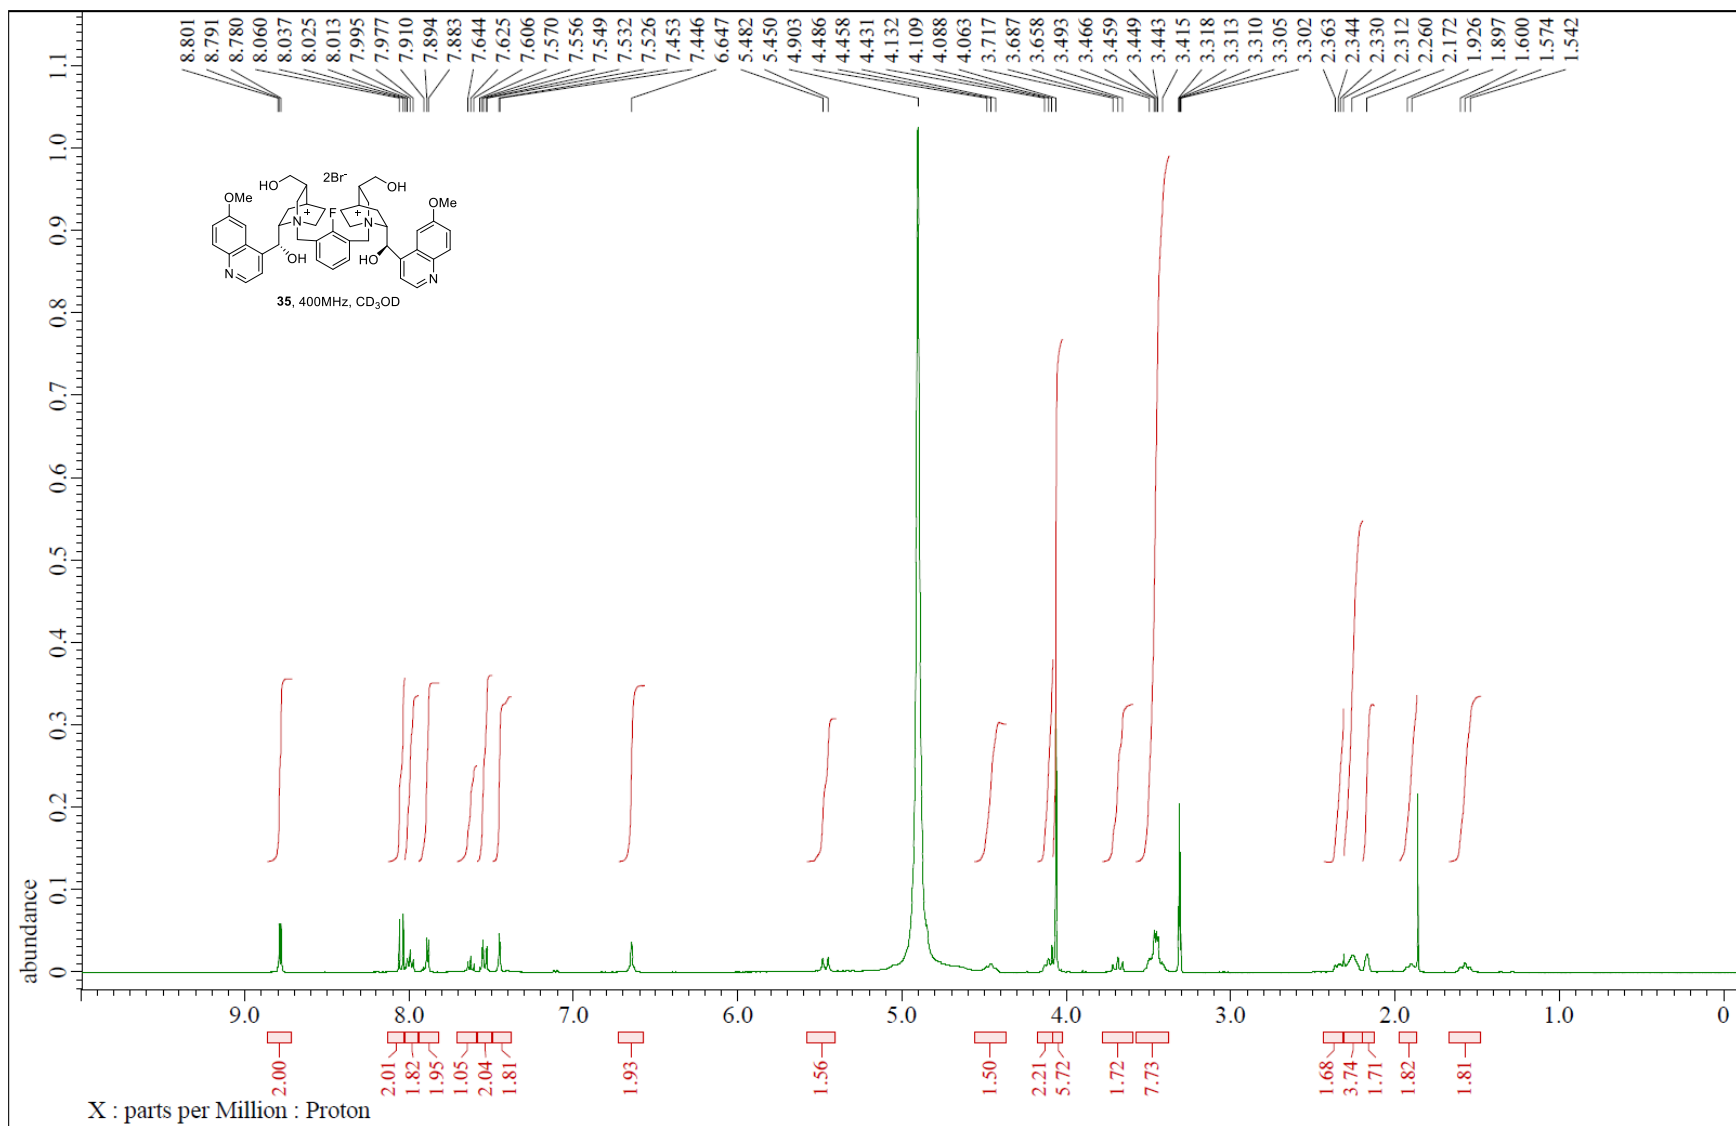

<sup>13</sup>C-NMR of compound 35

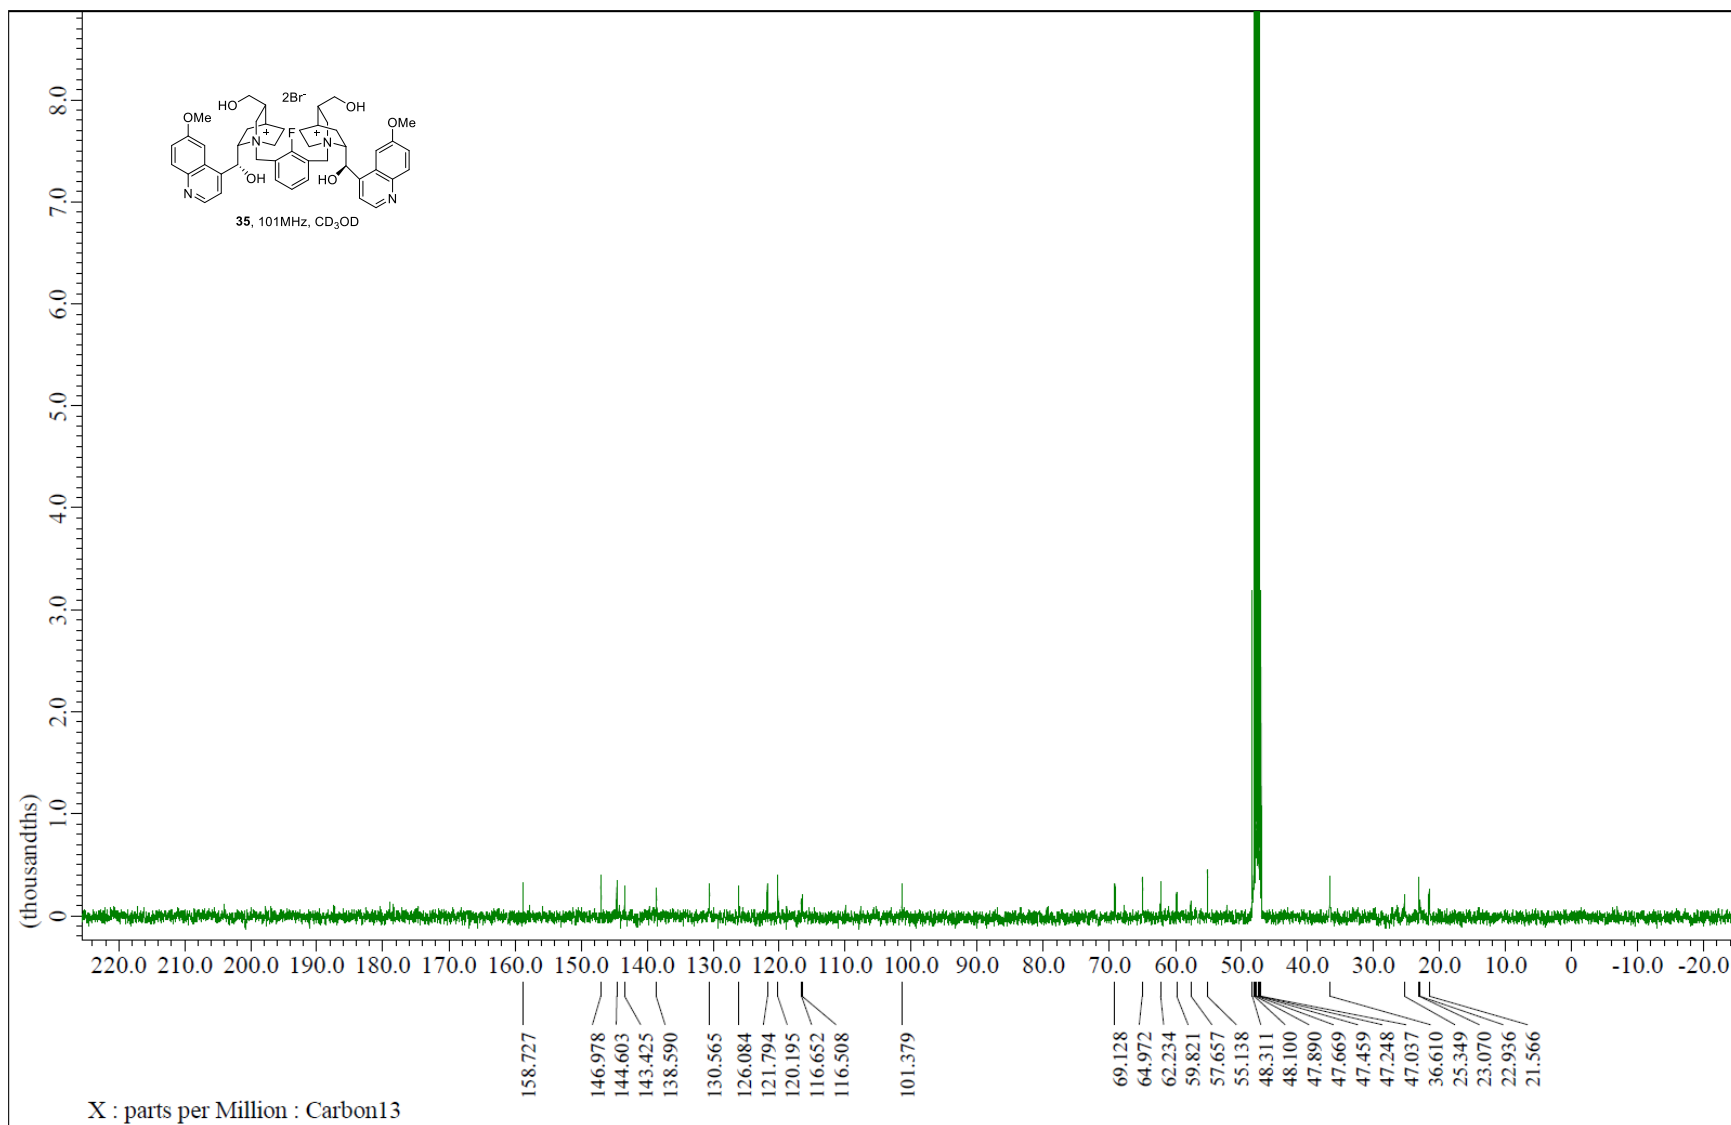

<sup>1</sup>H-NMR of compound S4

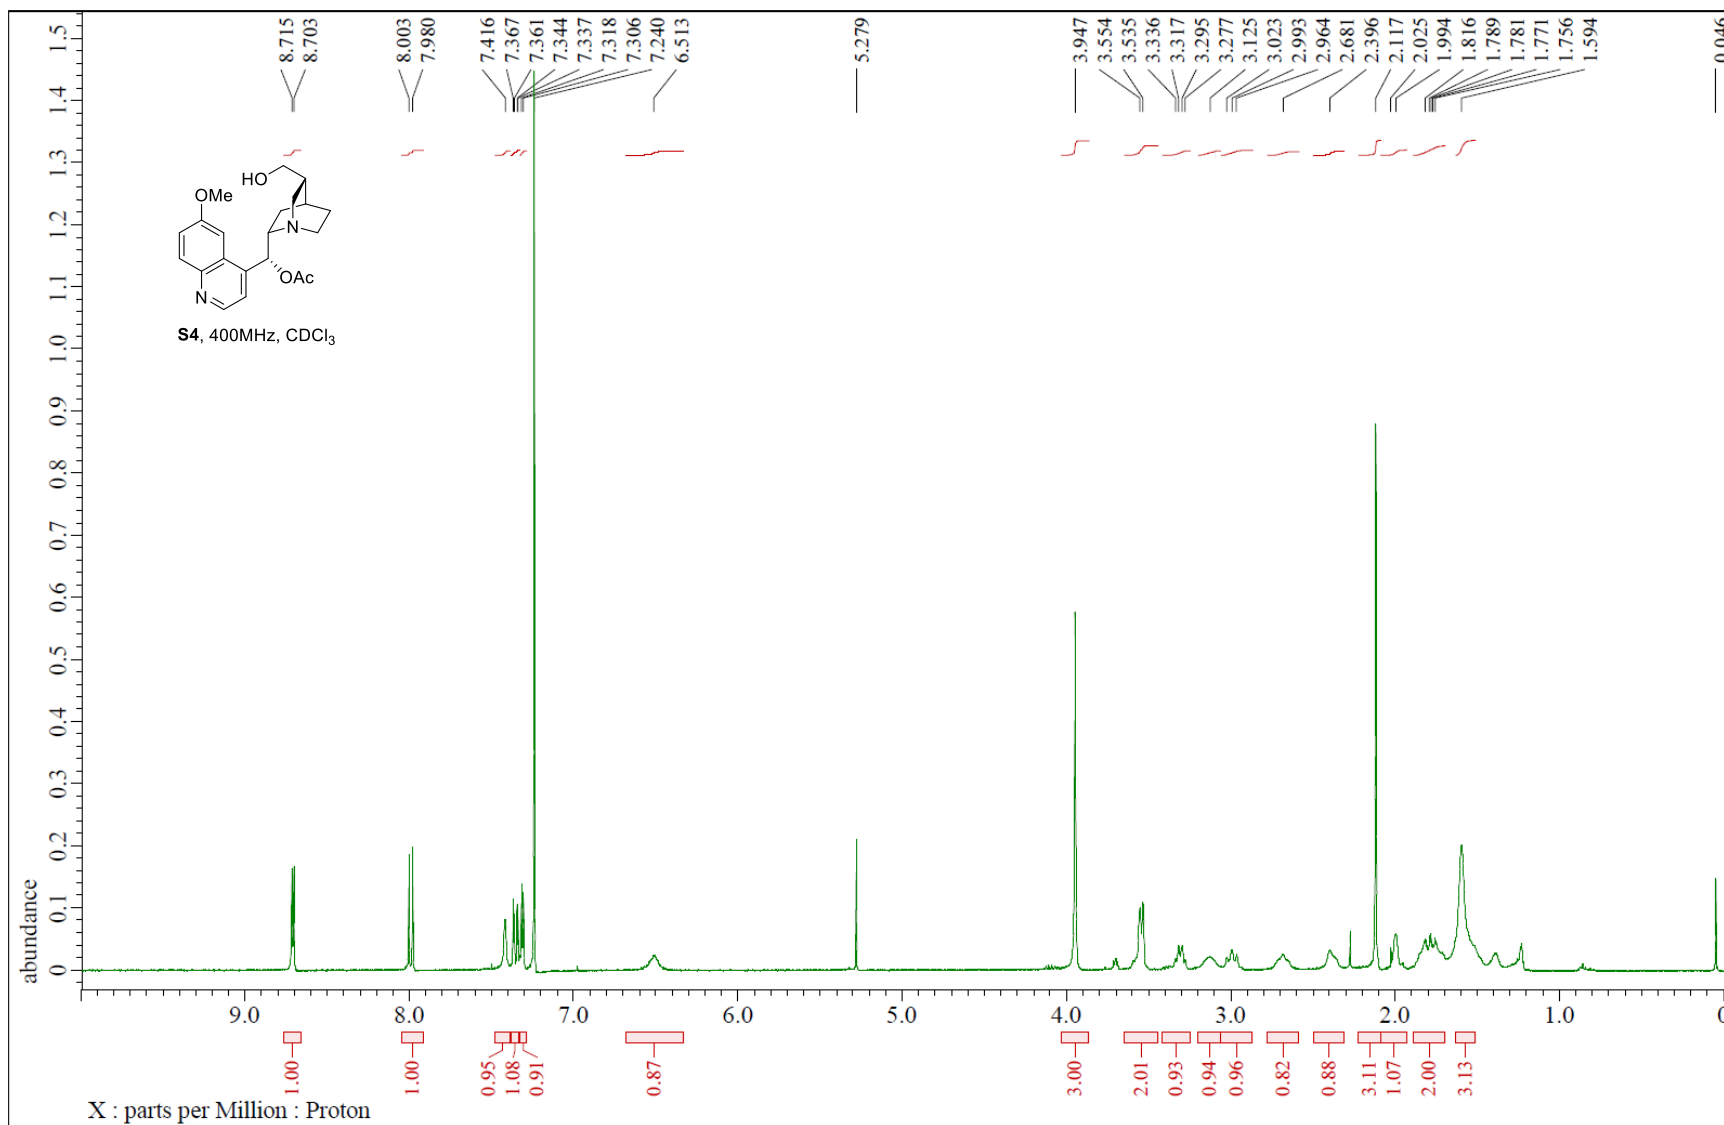

<sup>13</sup>C-NMR of compound **S4**

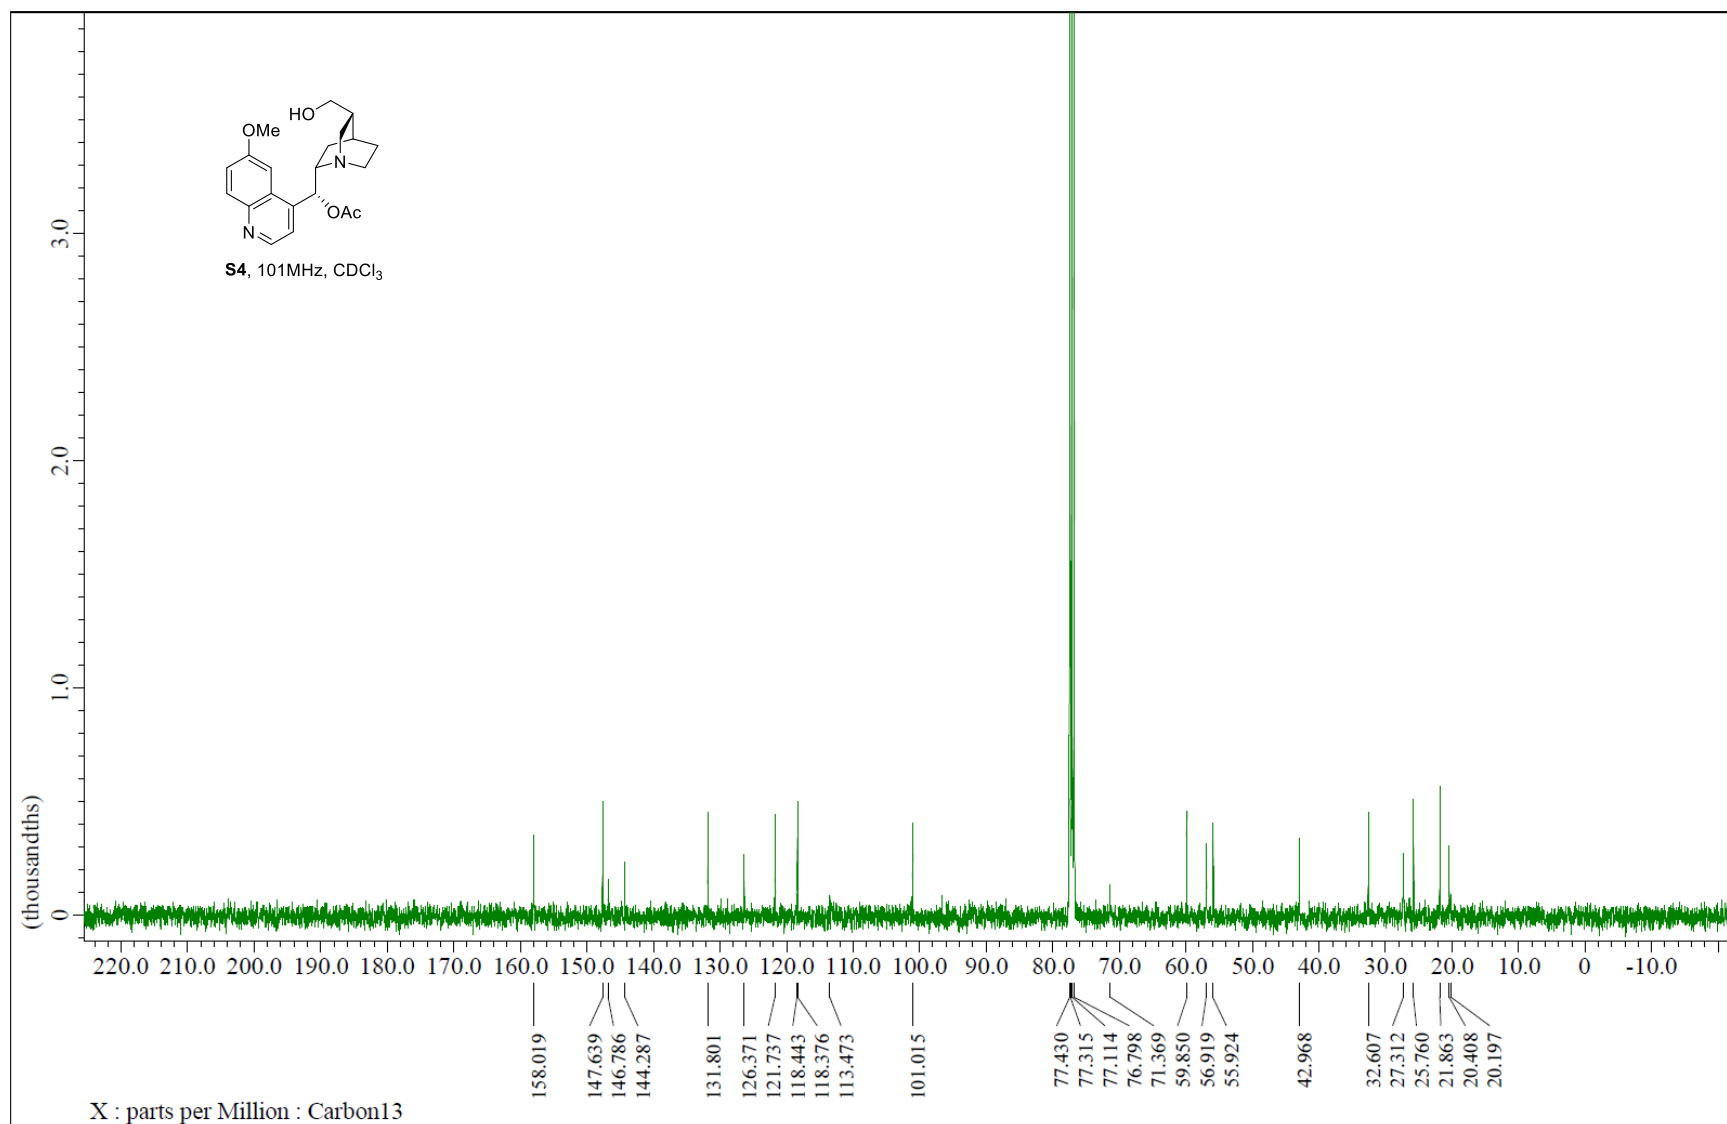



<sup>1</sup>H-NMR of compound **S5**

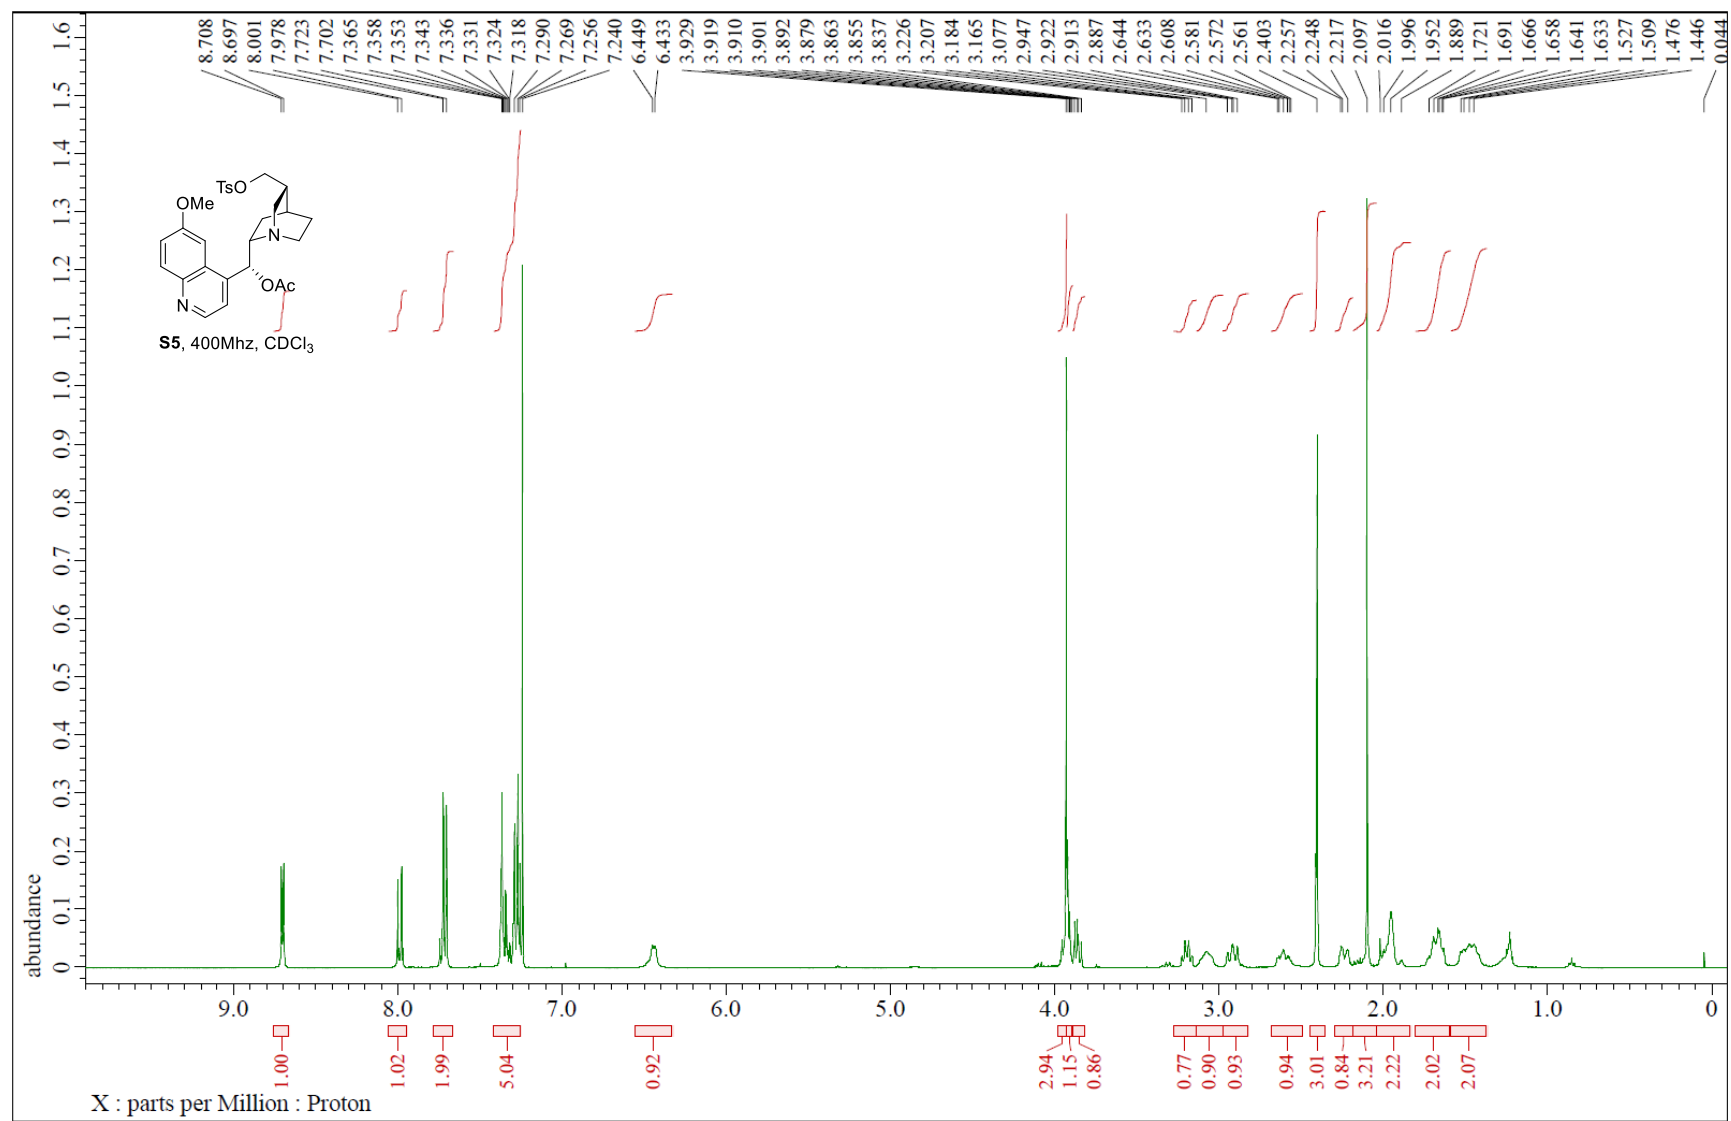

<sup>13</sup>C-NMR of compound **S5**

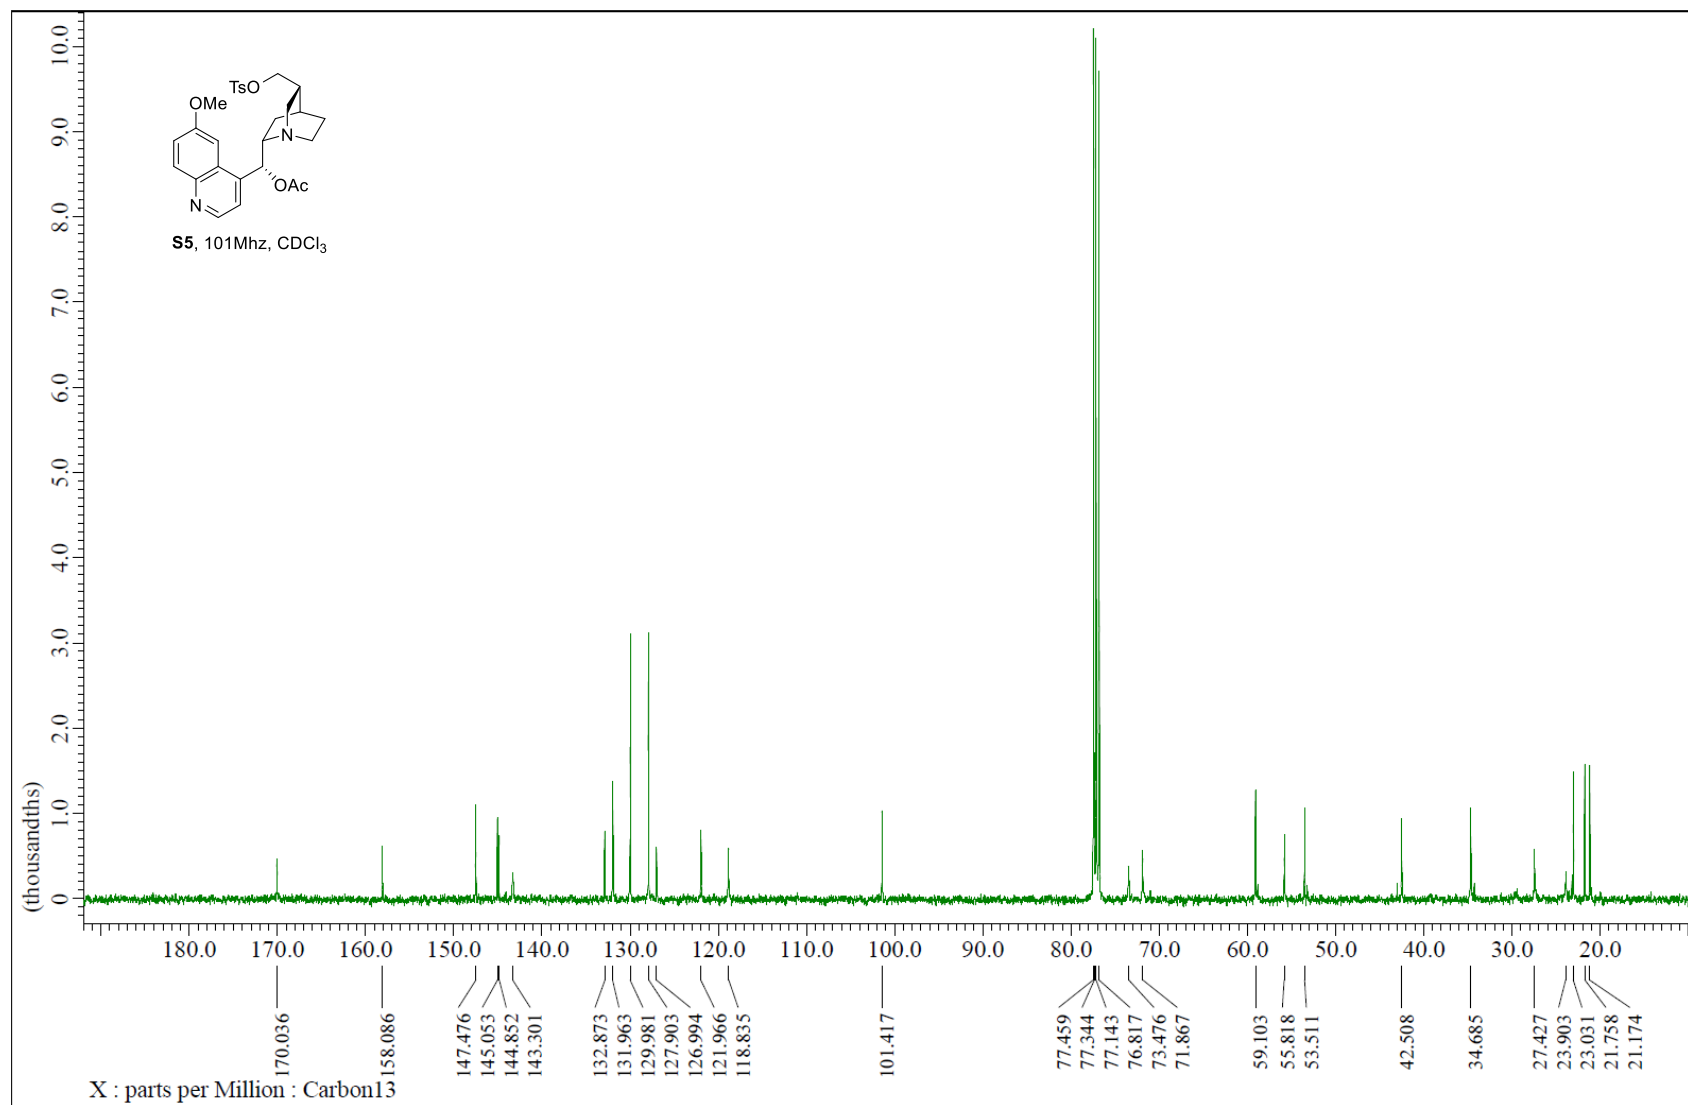

<sup>1</sup>H-NMR of compound S6

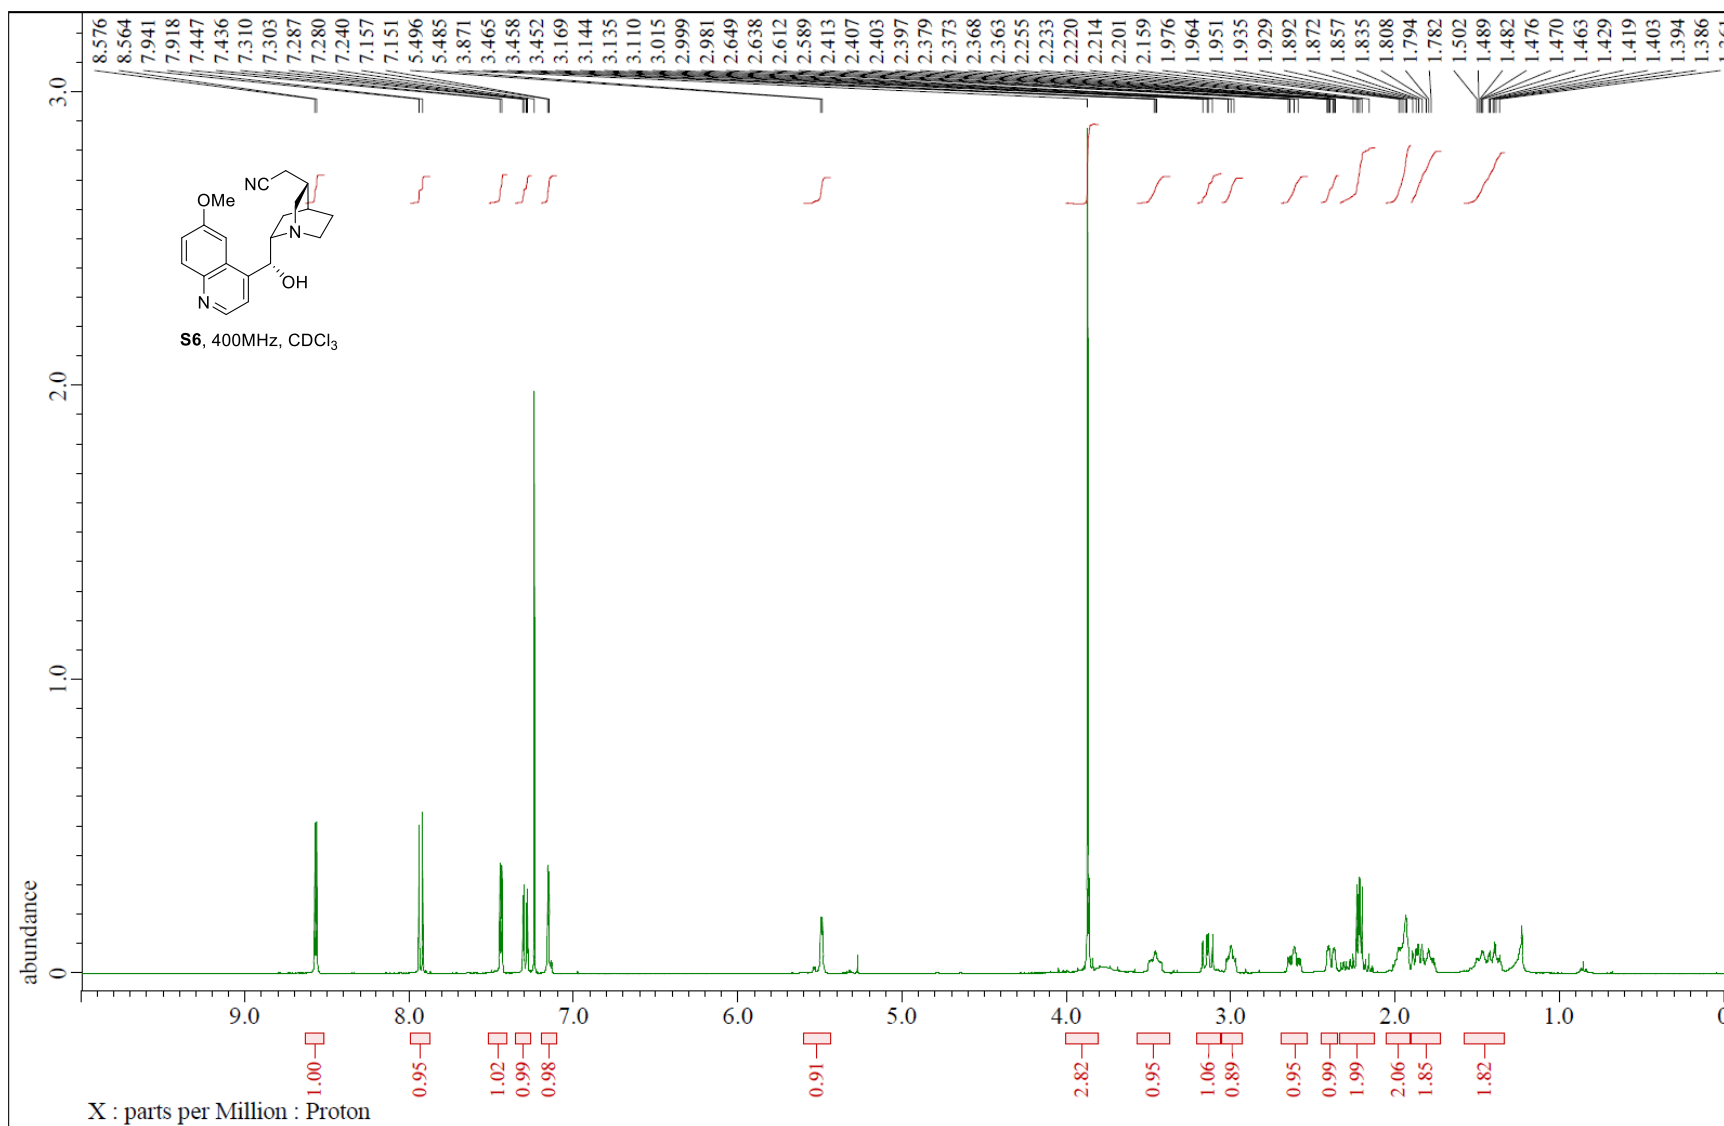

<sup>13</sup>C-NMR of compound **S6**

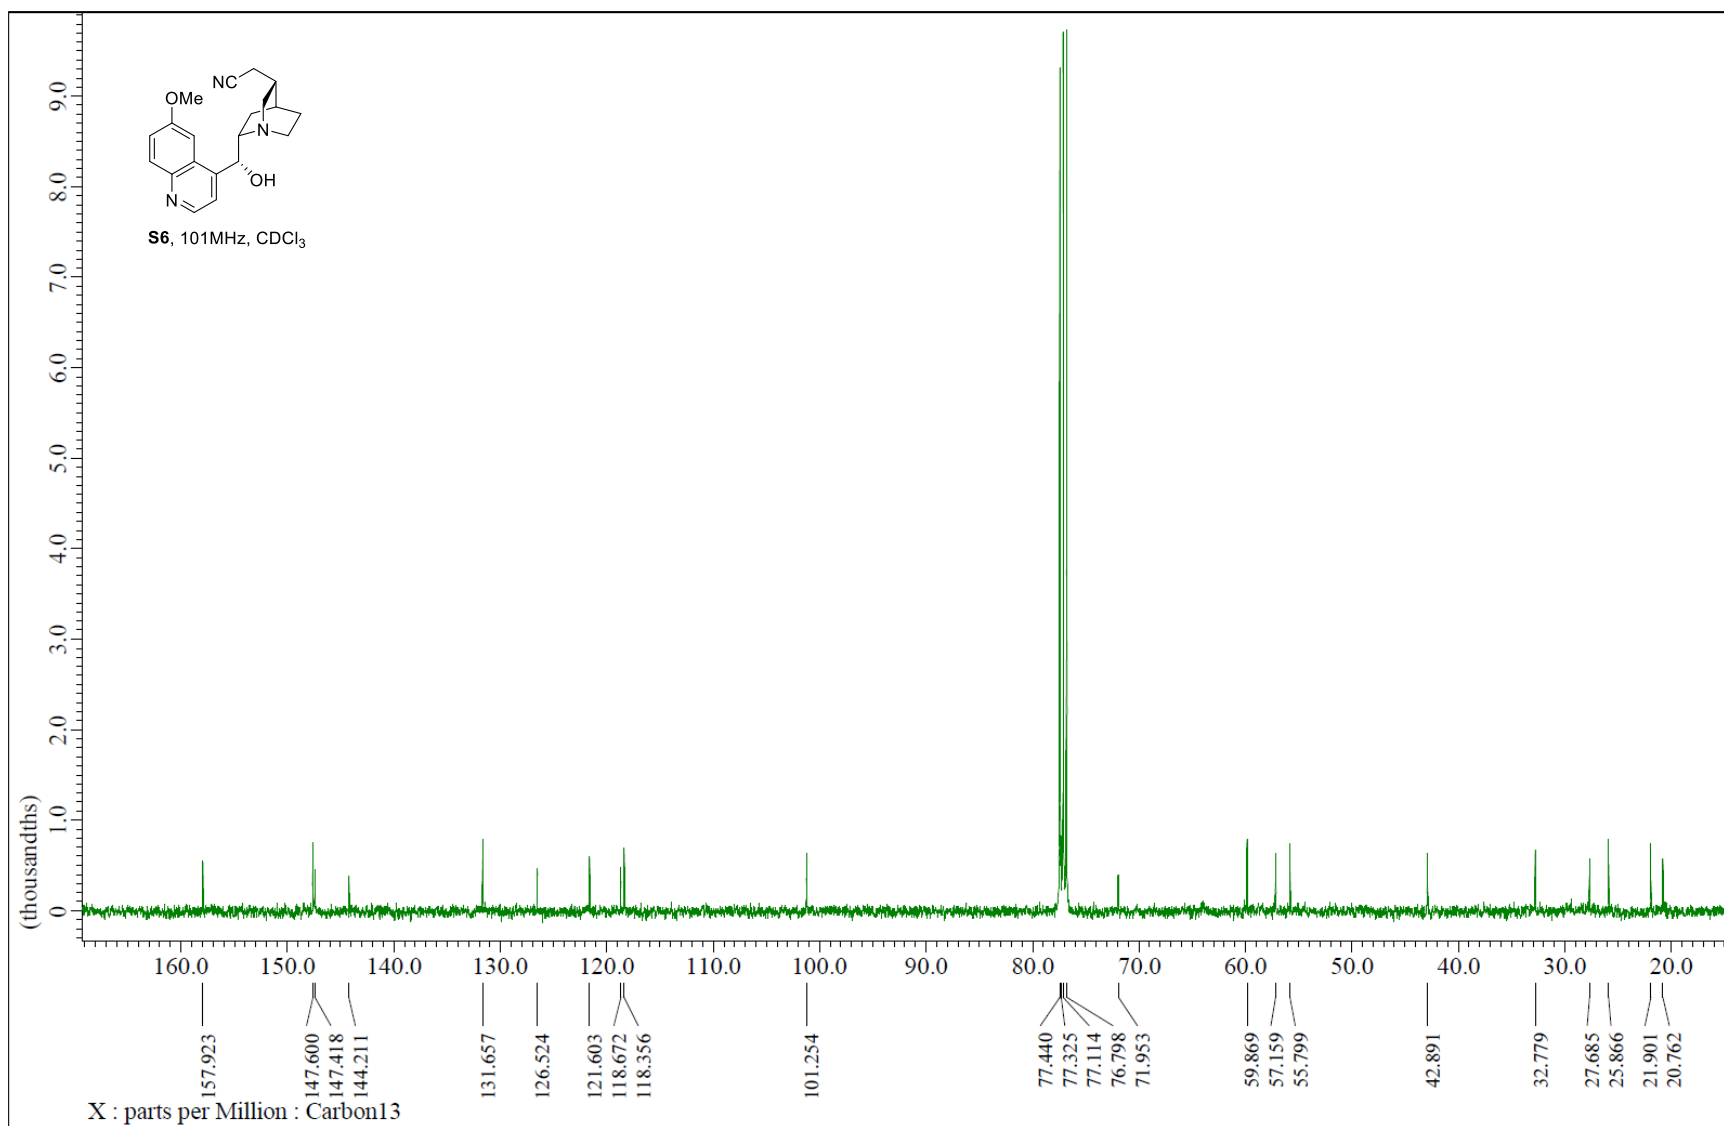

<sup>1</sup>H-NMR of compound 36

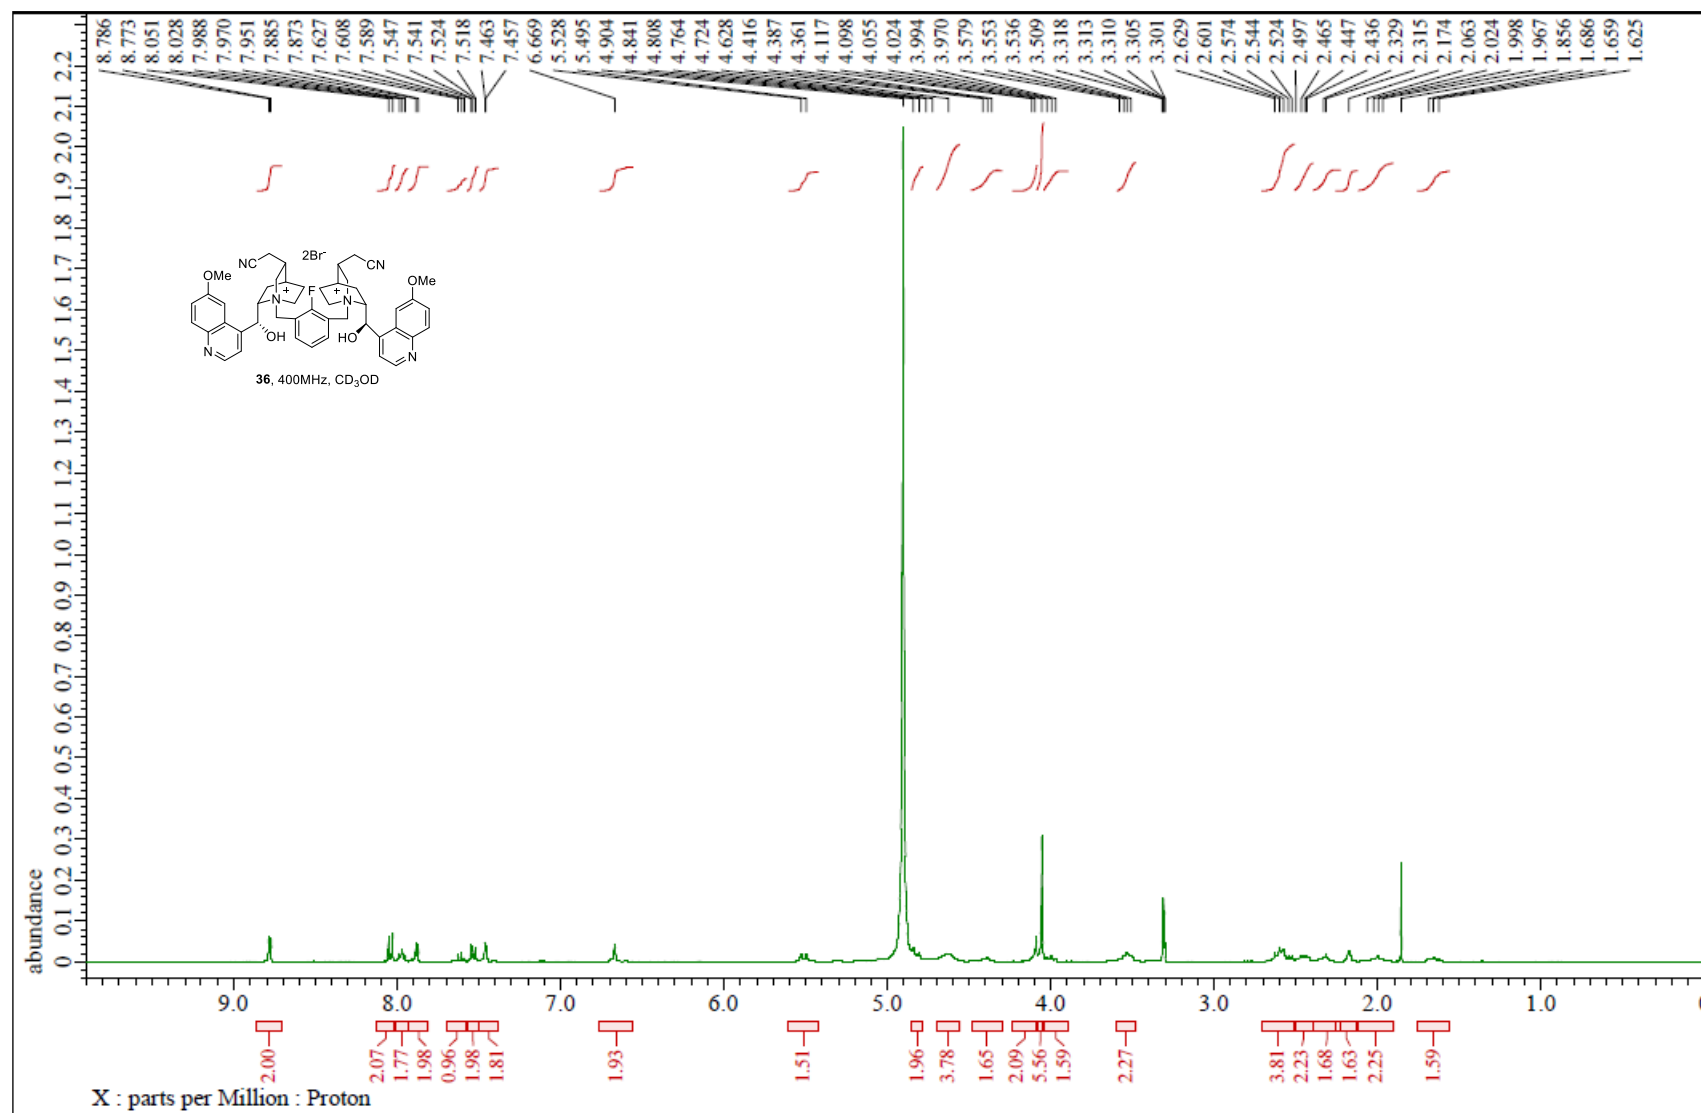

<sup>13</sup>C-NMR of compound **36**

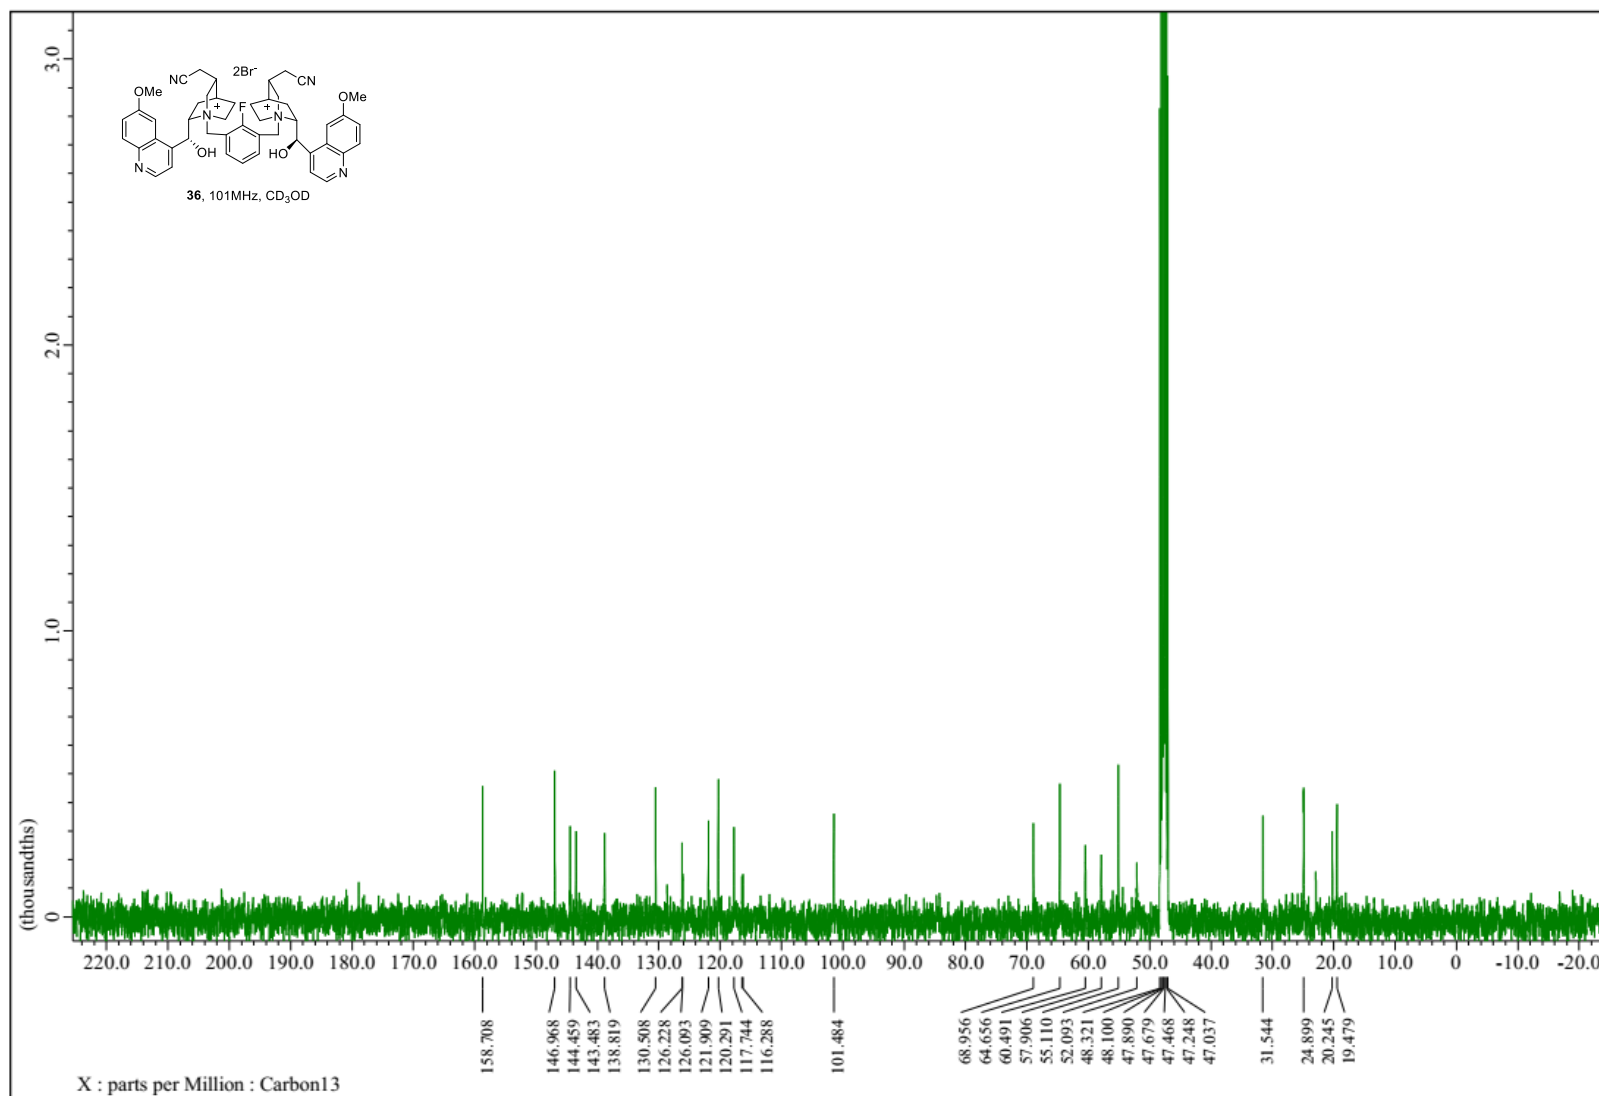

<sup>1</sup>H-NMR of compound 37

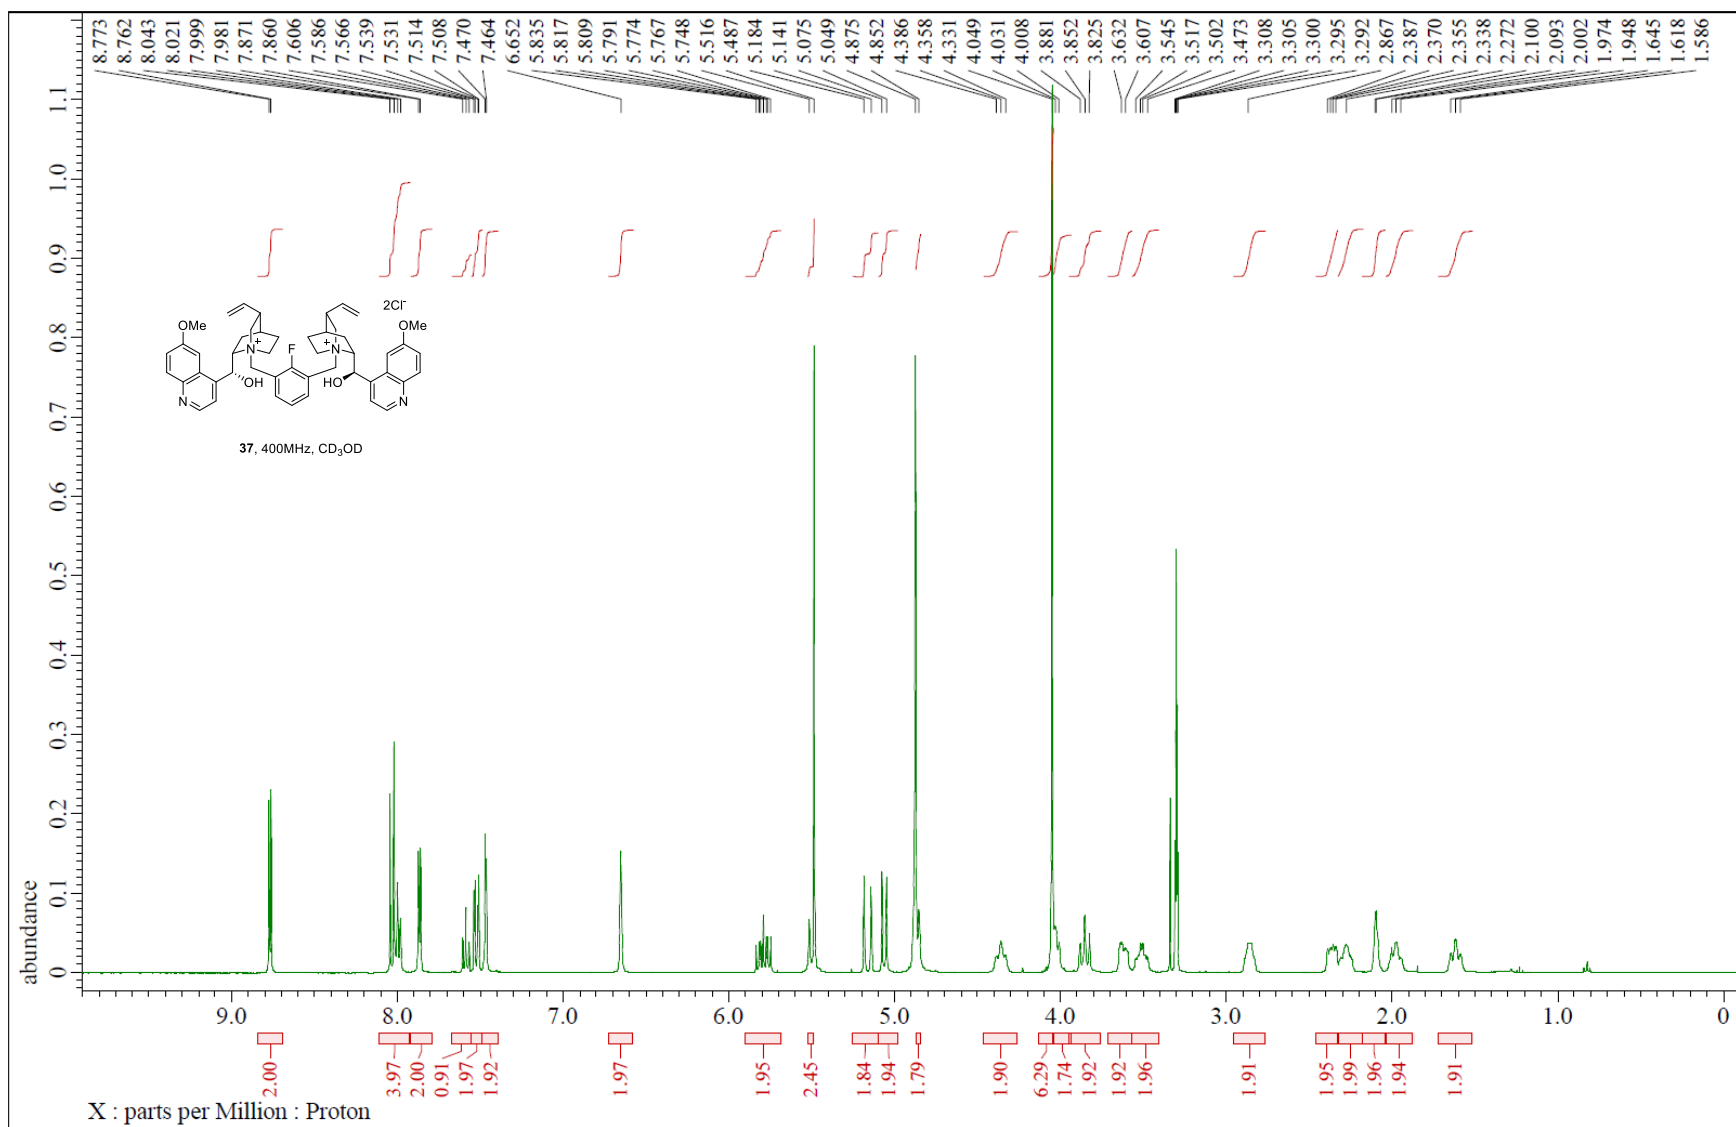

<sup>13</sup>C-NMR of compound **37**

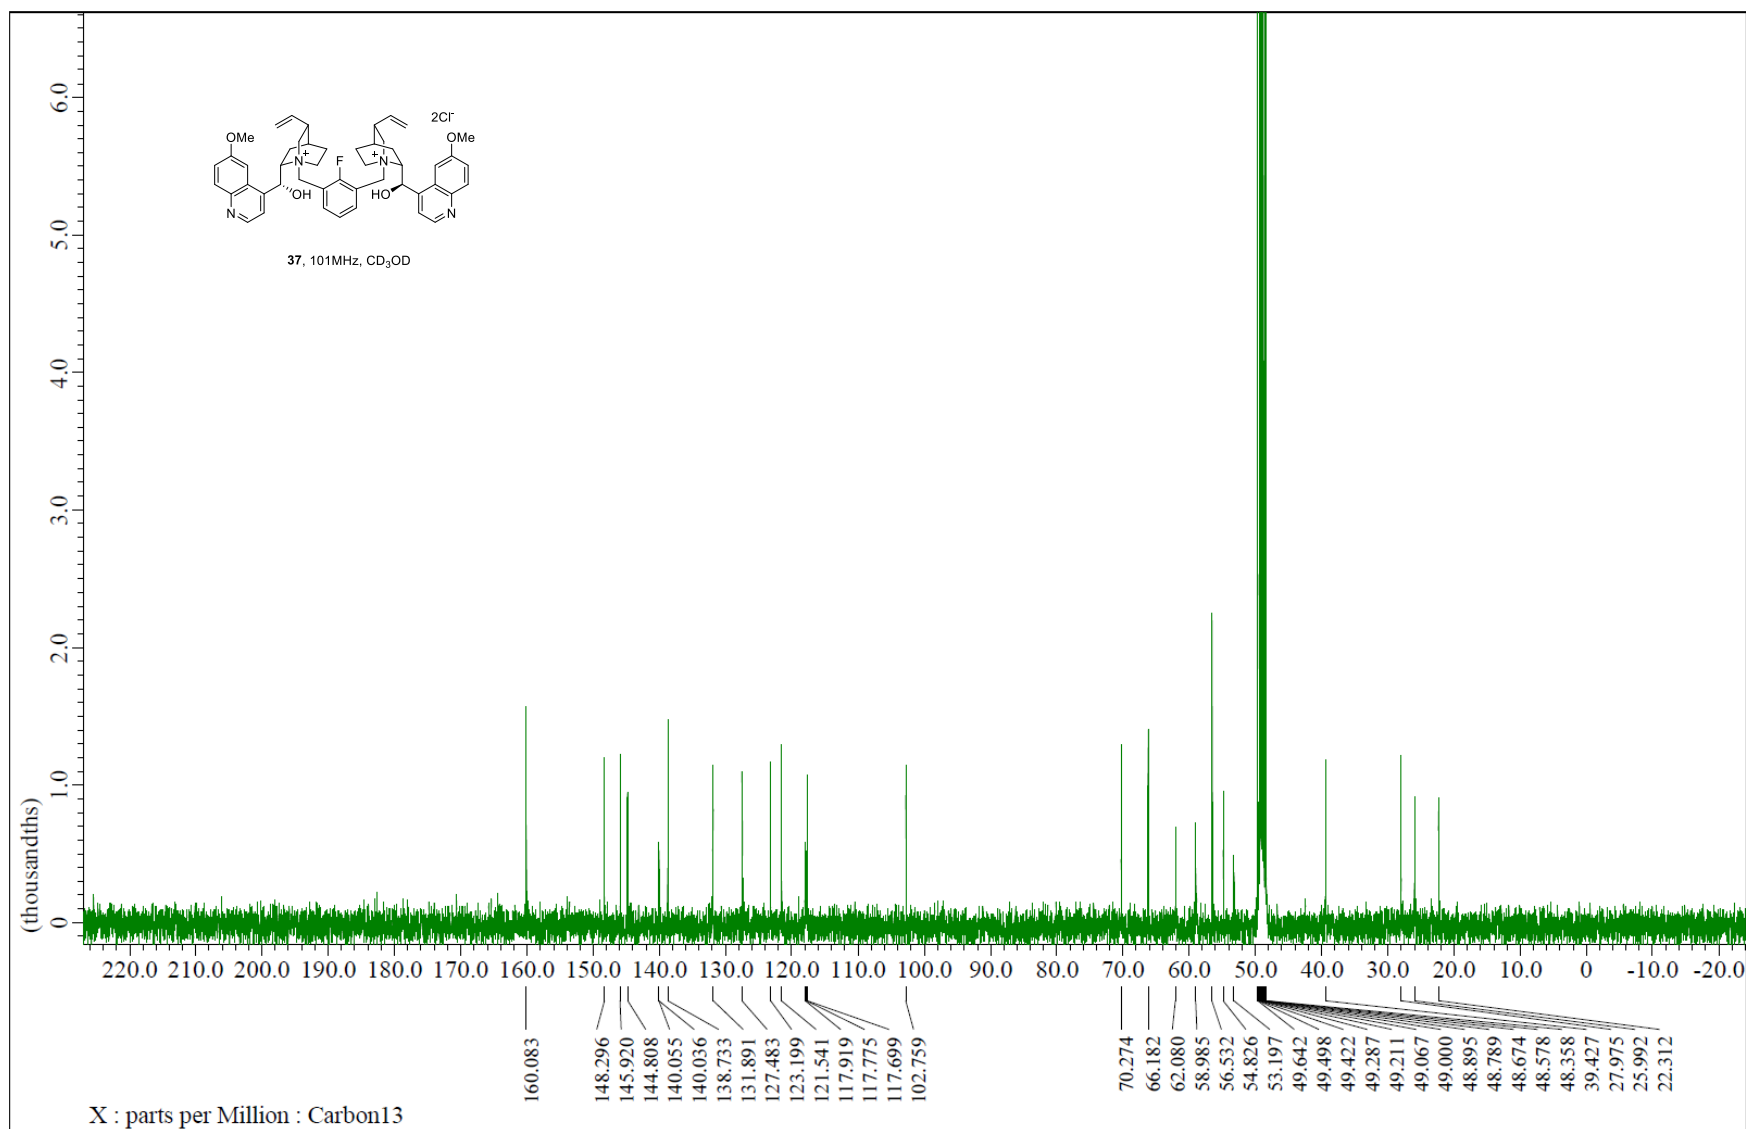



<sup>1</sup>H-NMR of compound 38

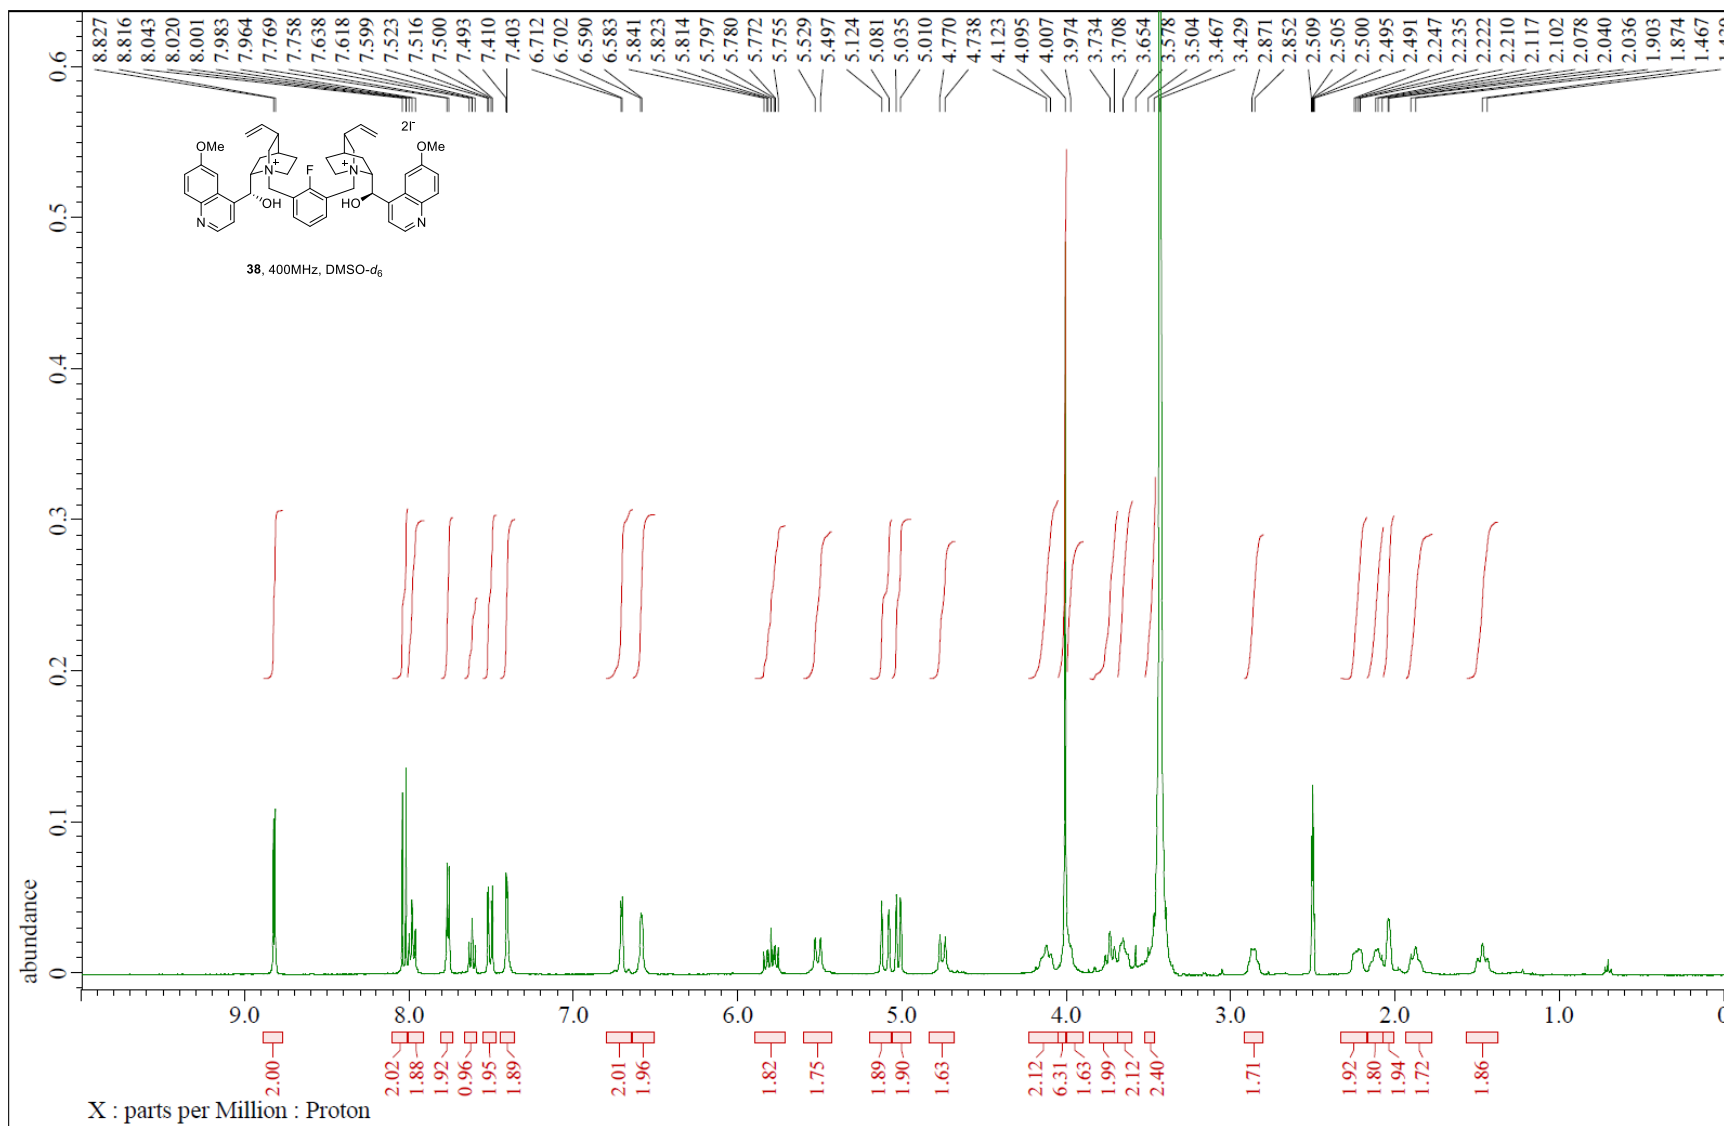

<sup>13</sup>C-NMR of compound **38**

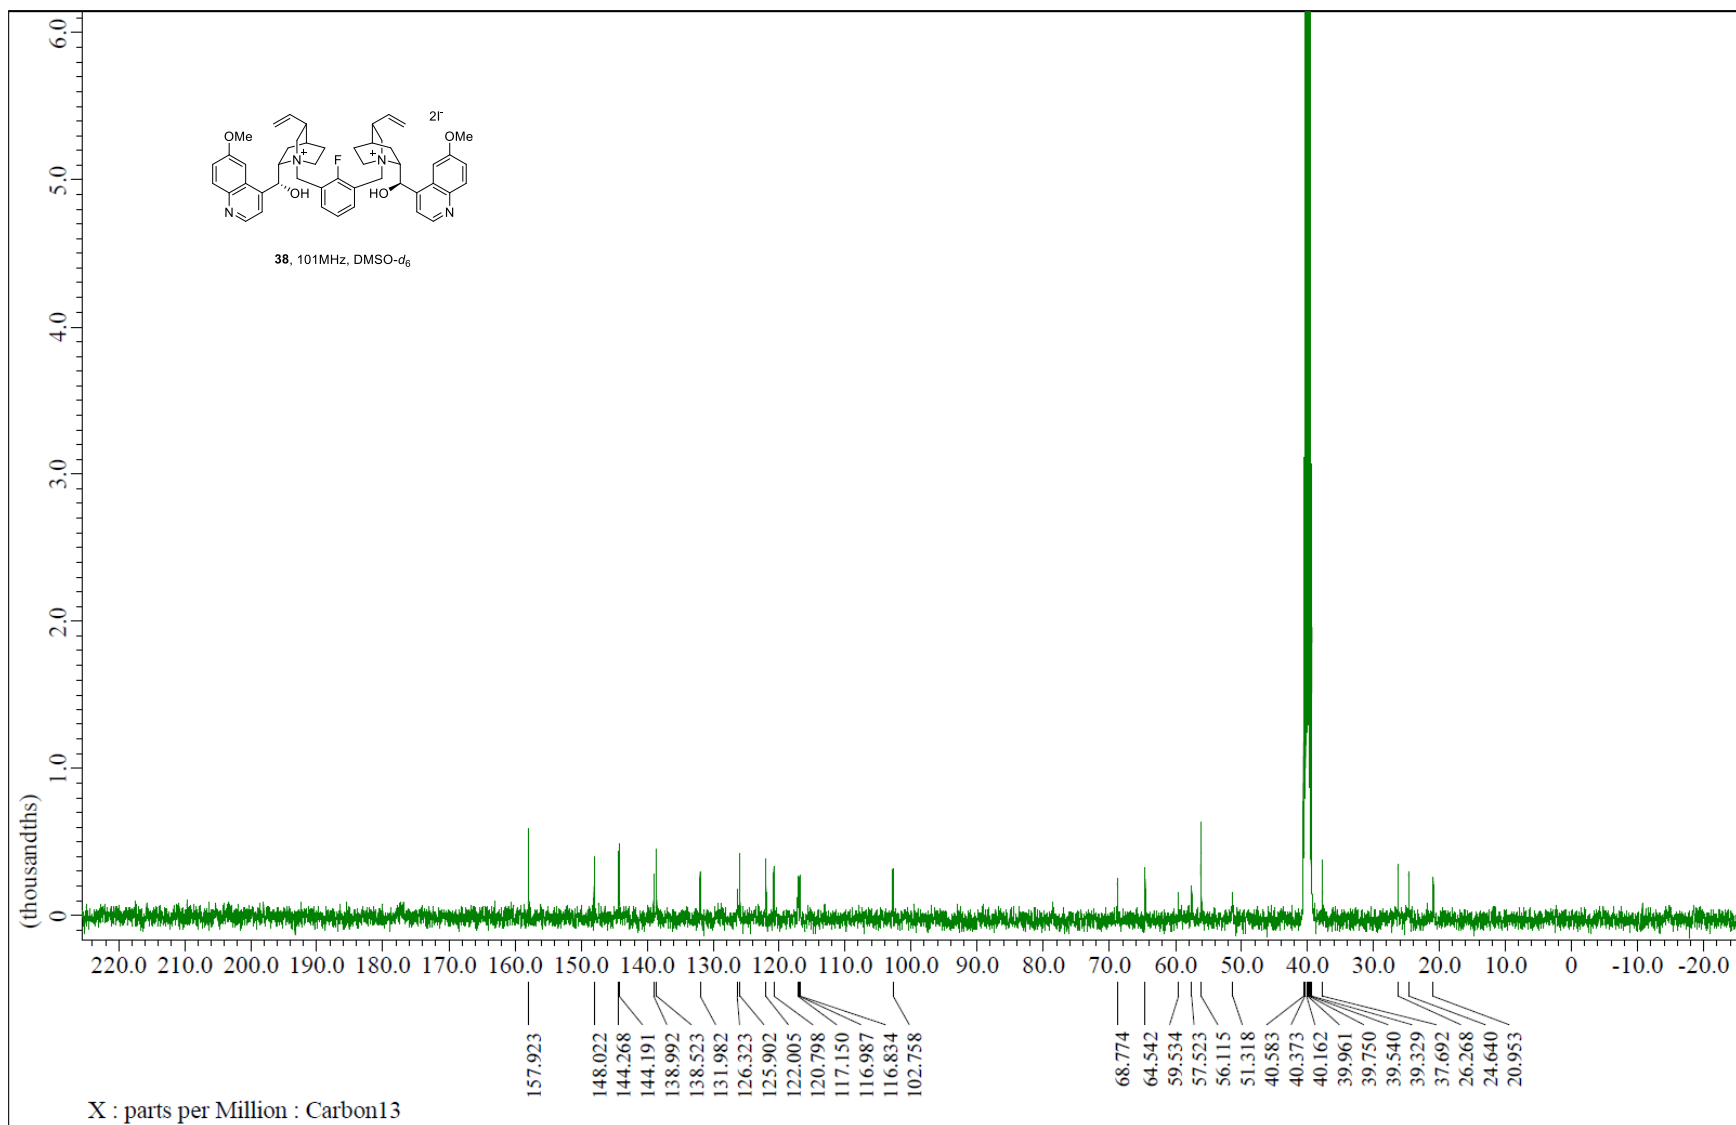

<sup>1</sup>H-NMR of compound **39**

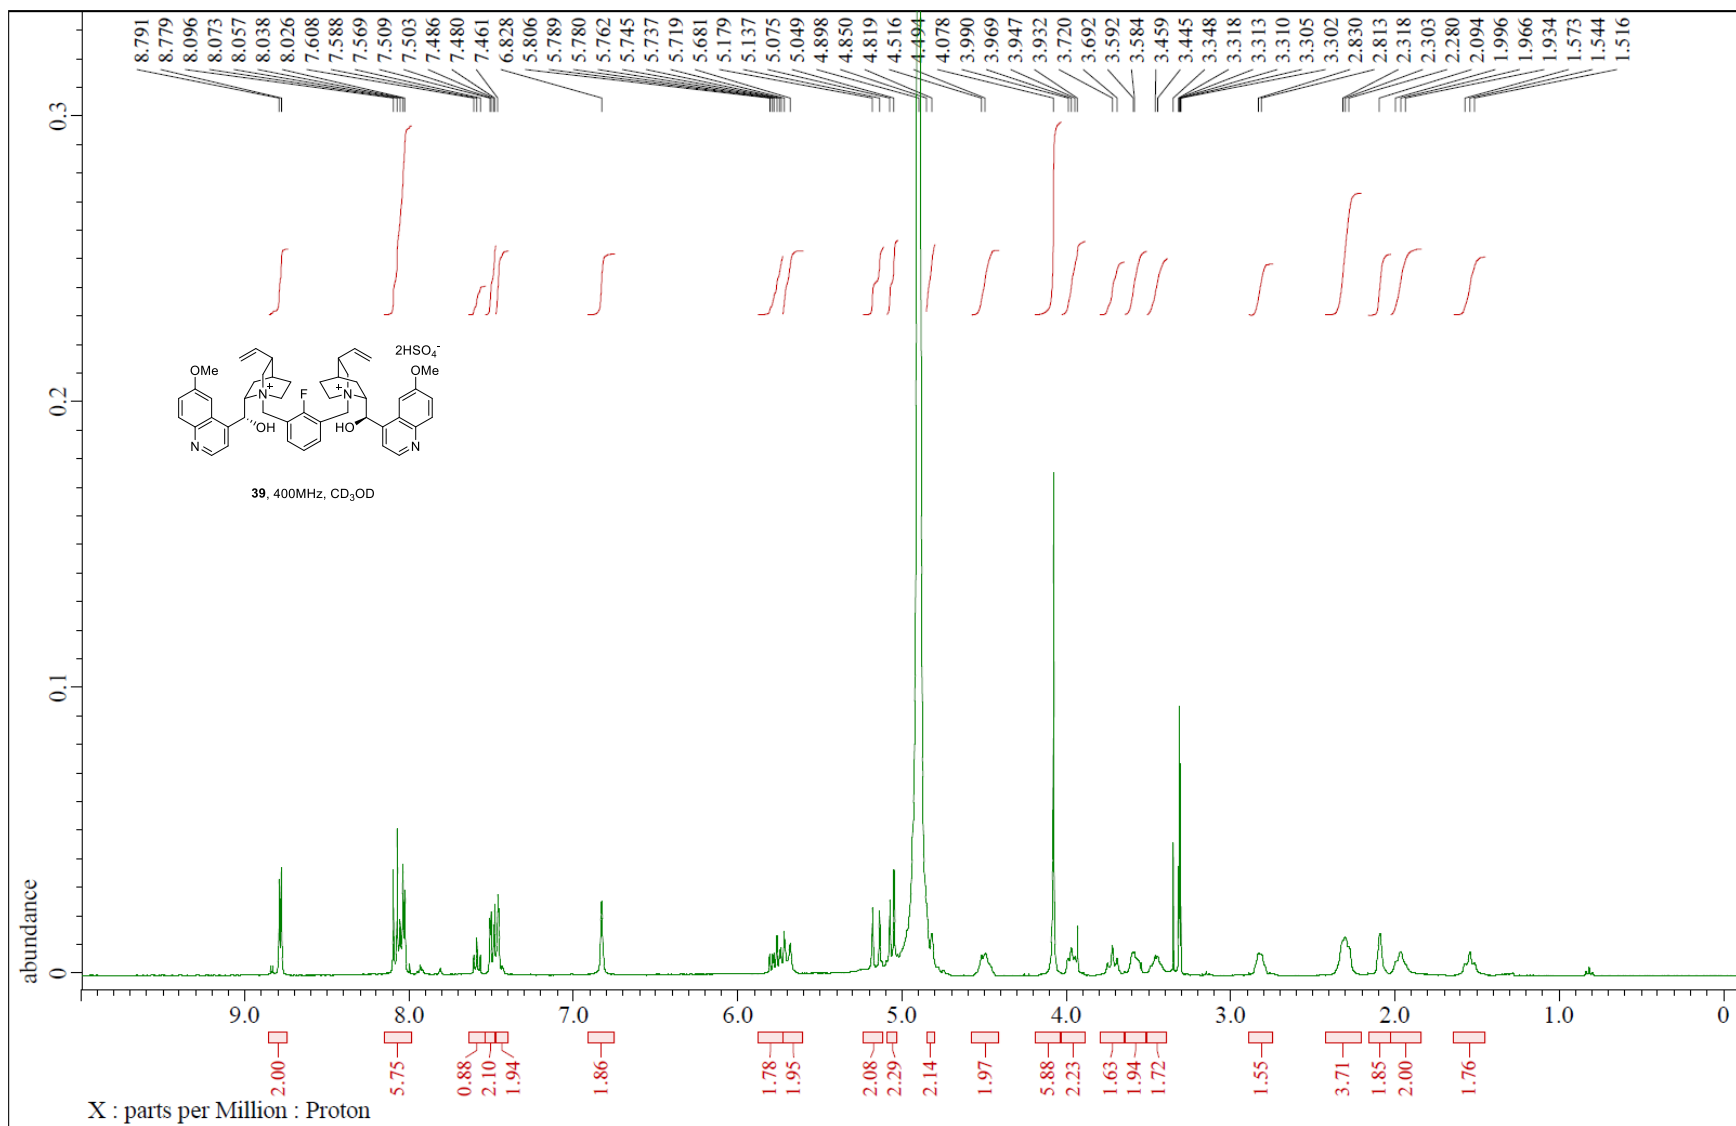

<sup>13</sup>C-NMR of compound **39**

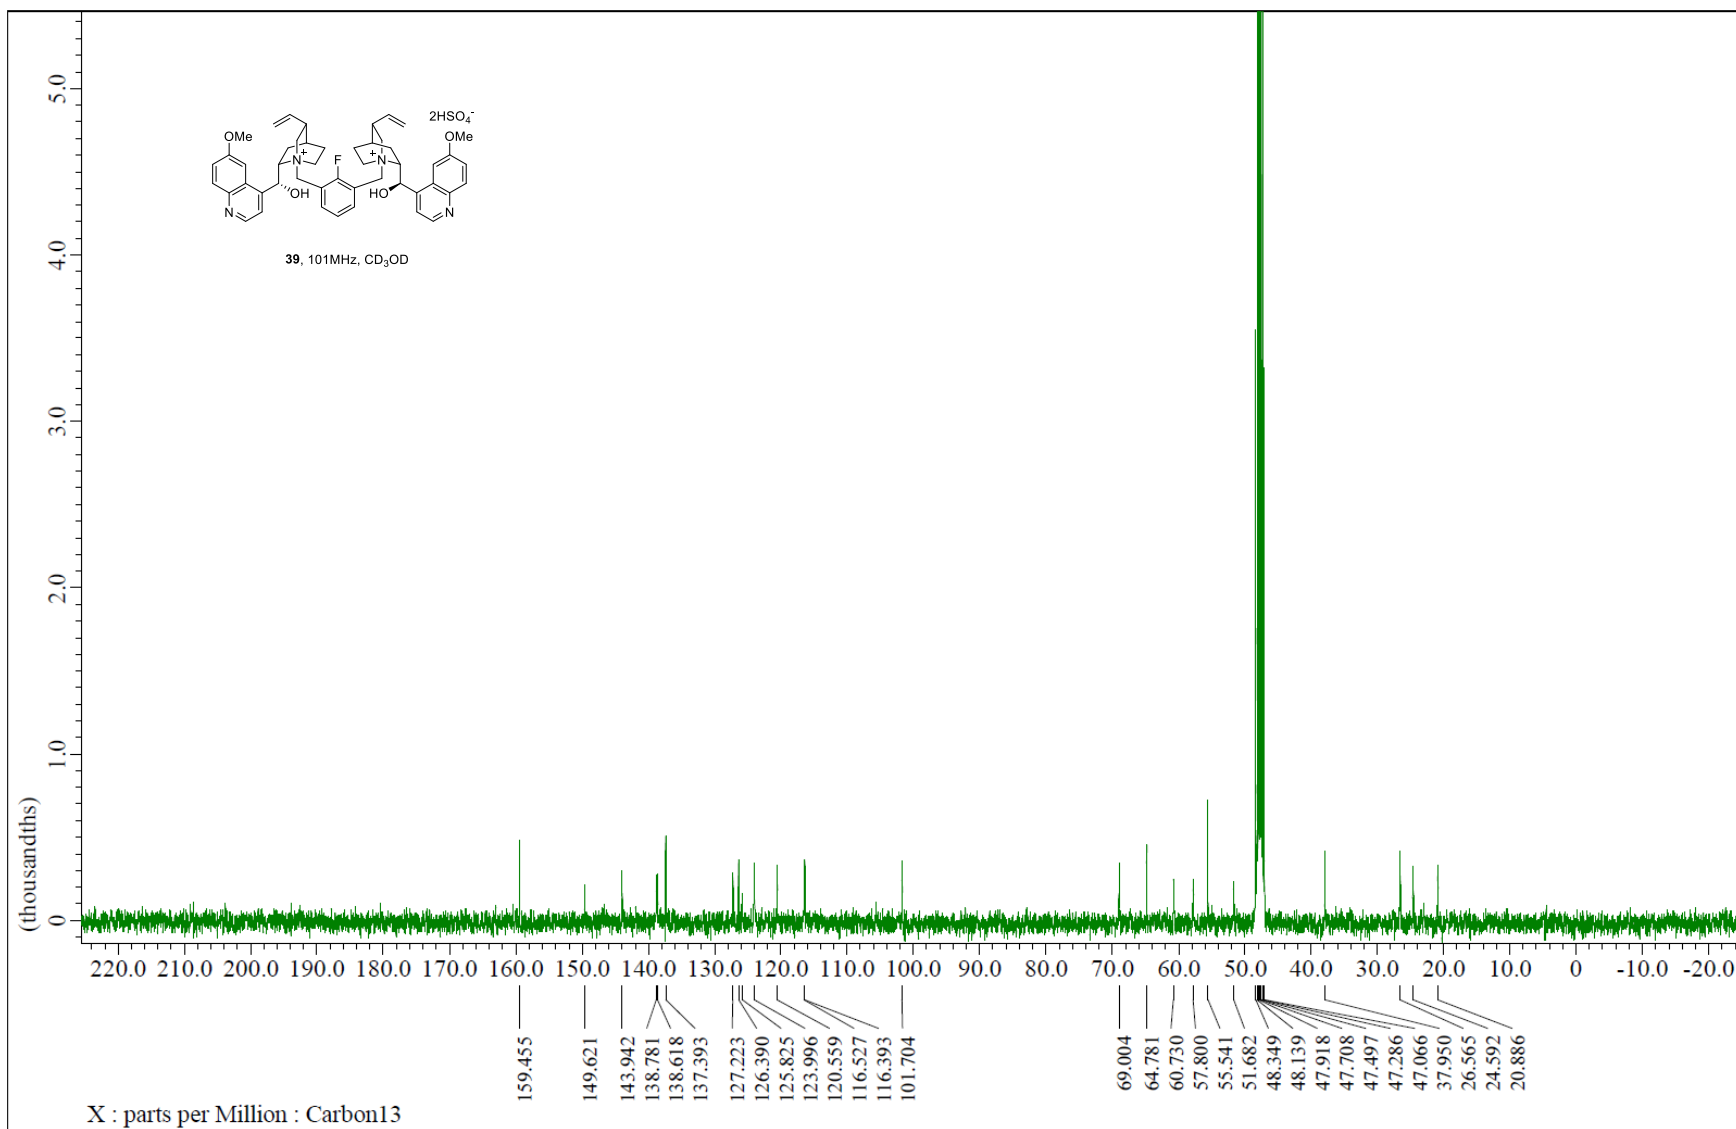

<sup>1</sup>H-NMR of compound 40

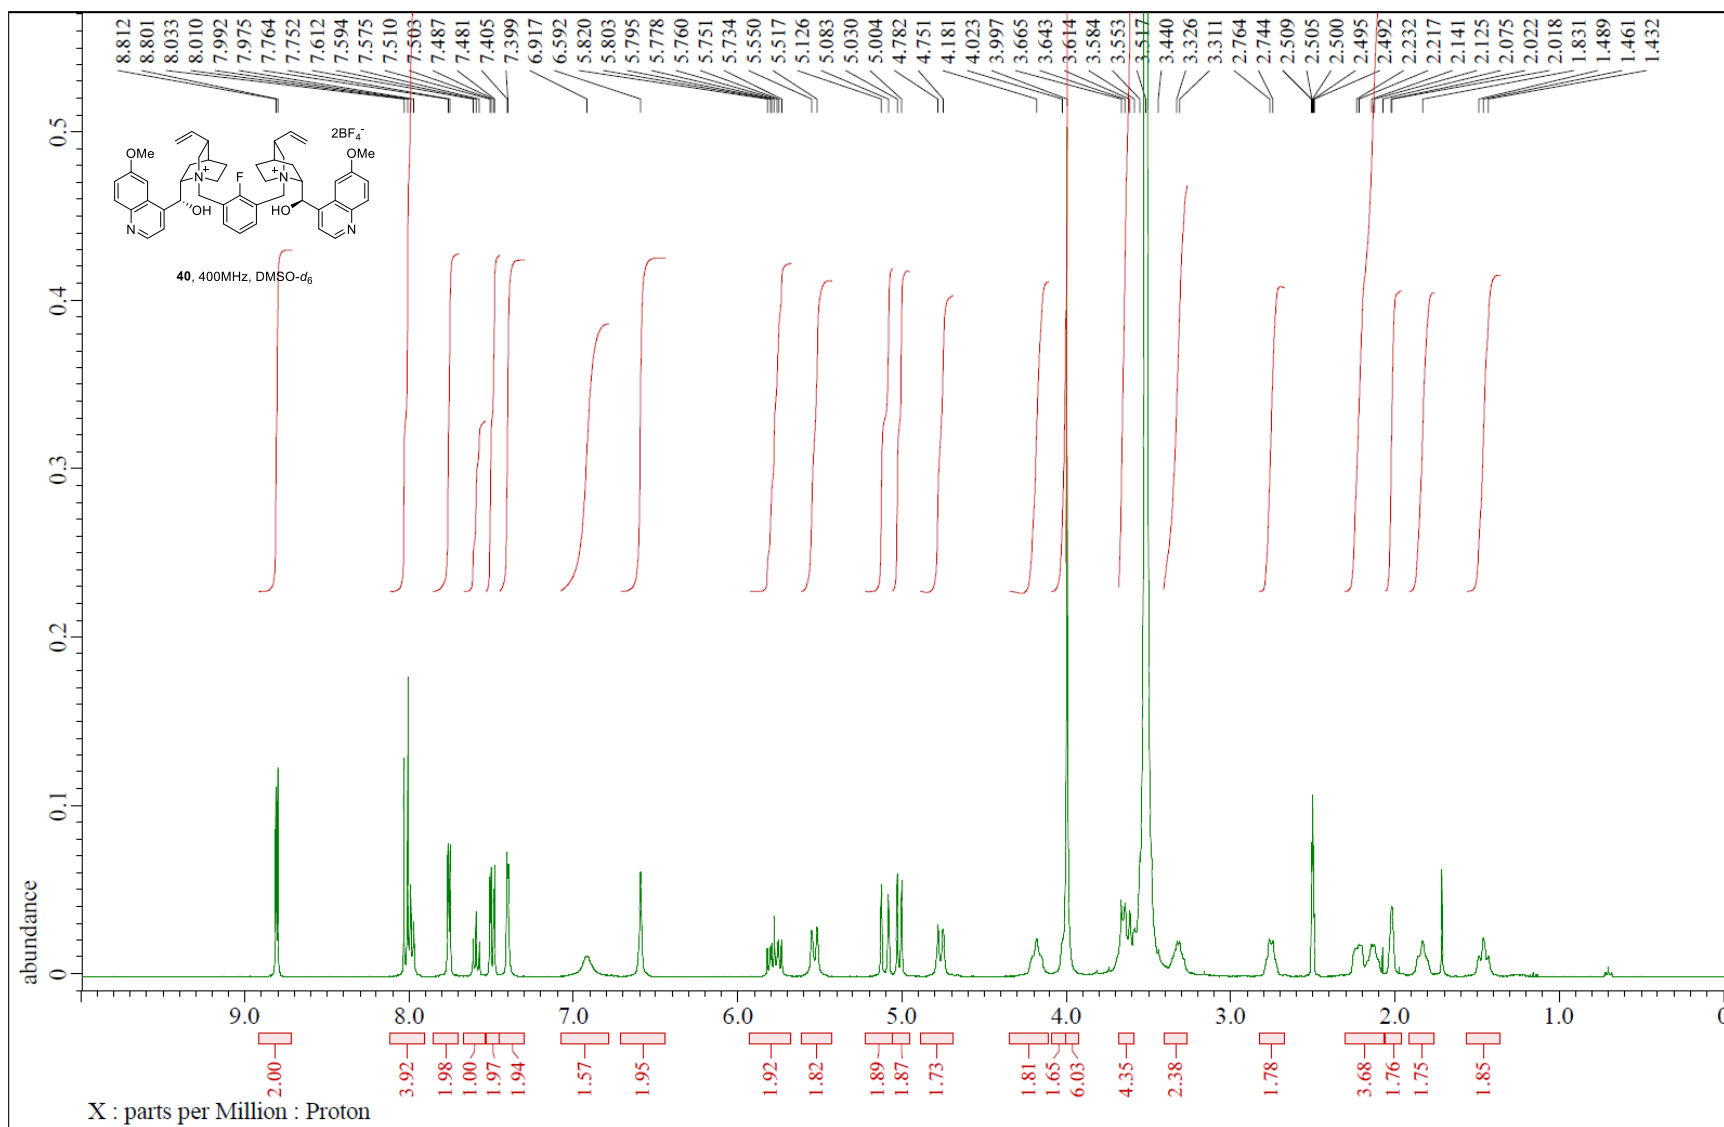

<sup>13</sup>C-NMR of compound **40**

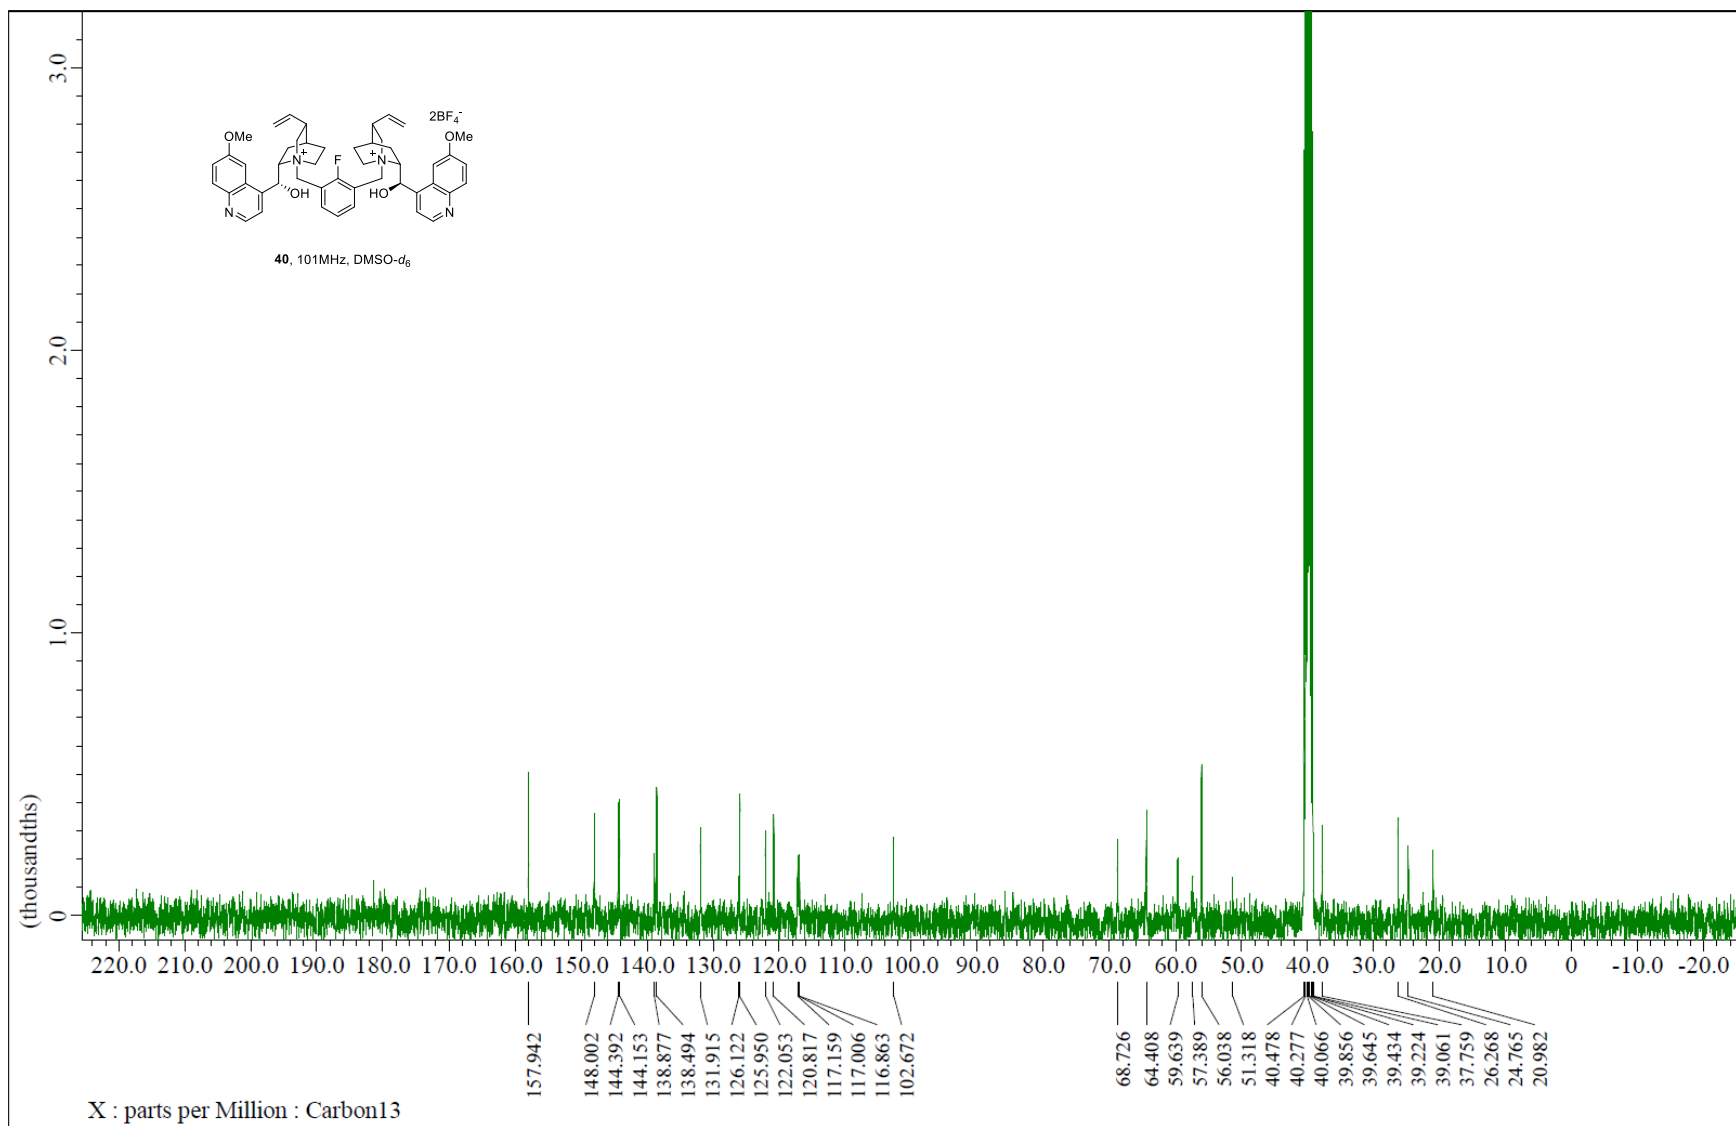

<sup>1</sup>H-NMR of compound **41**

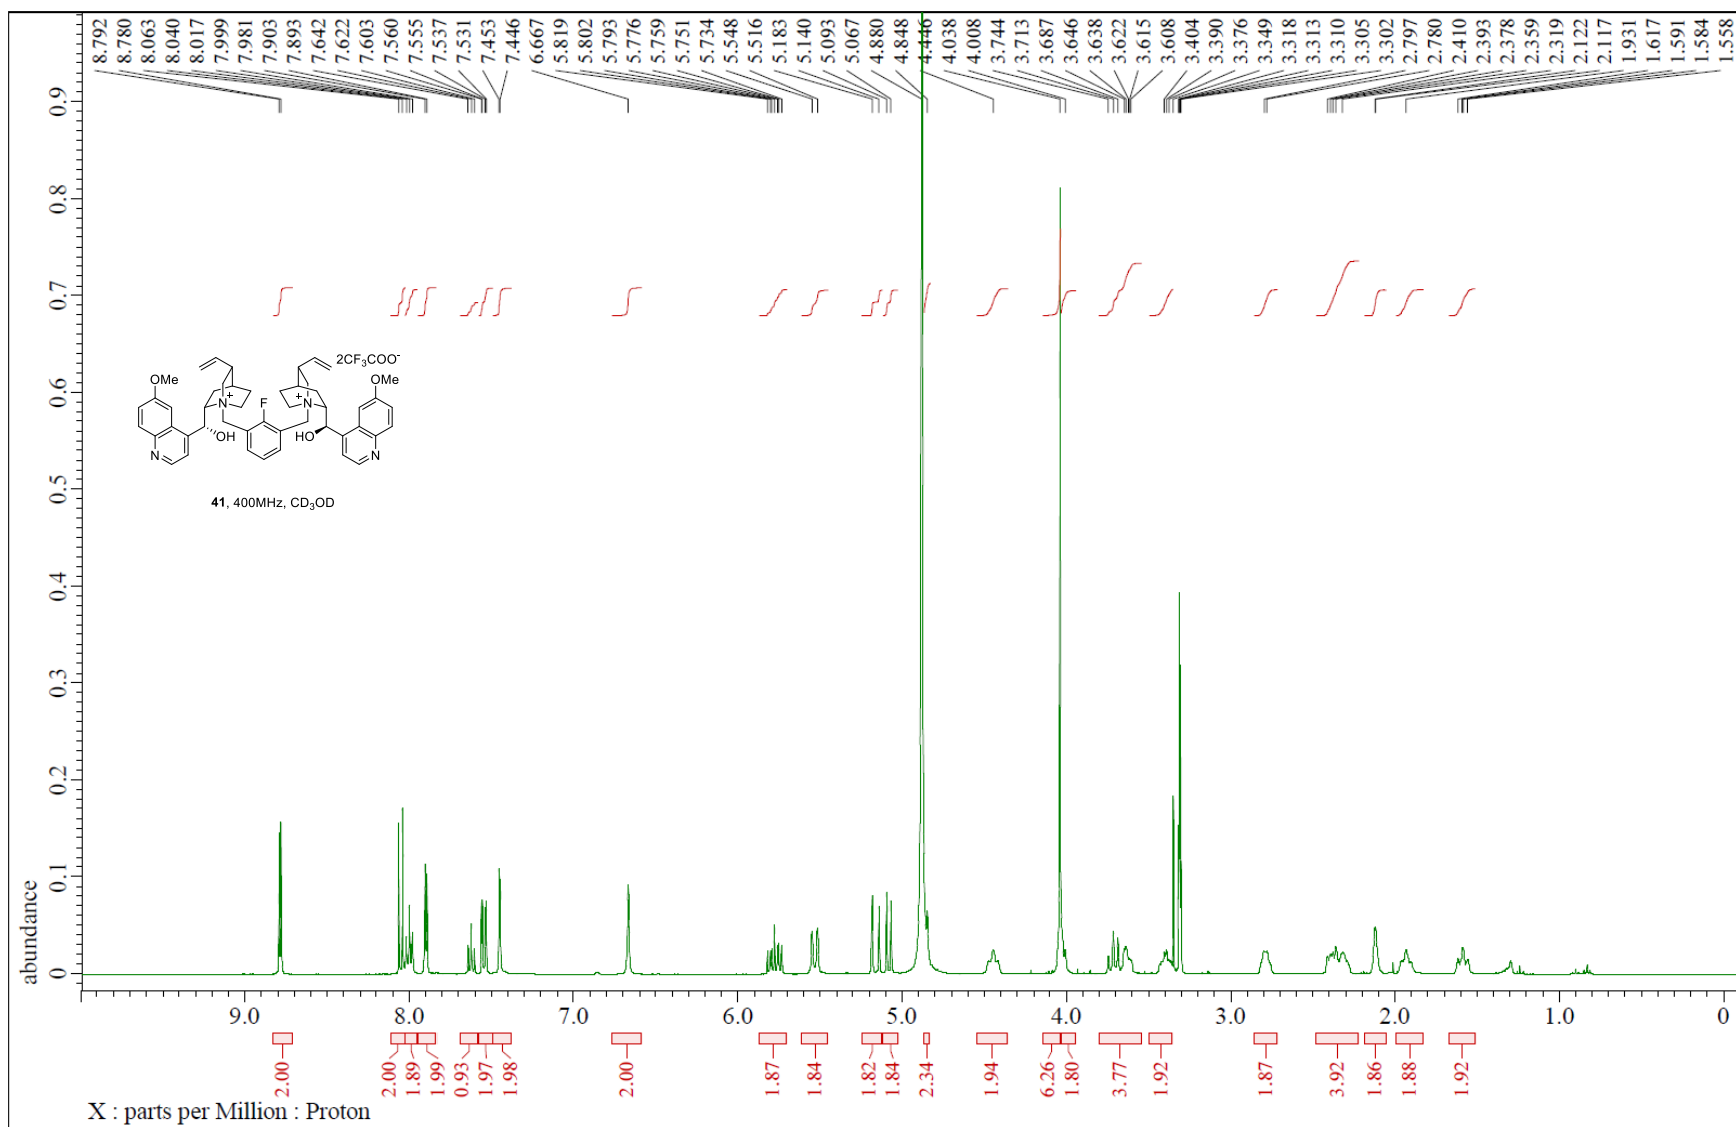

<sup>13</sup>C-NMR of compound **41**

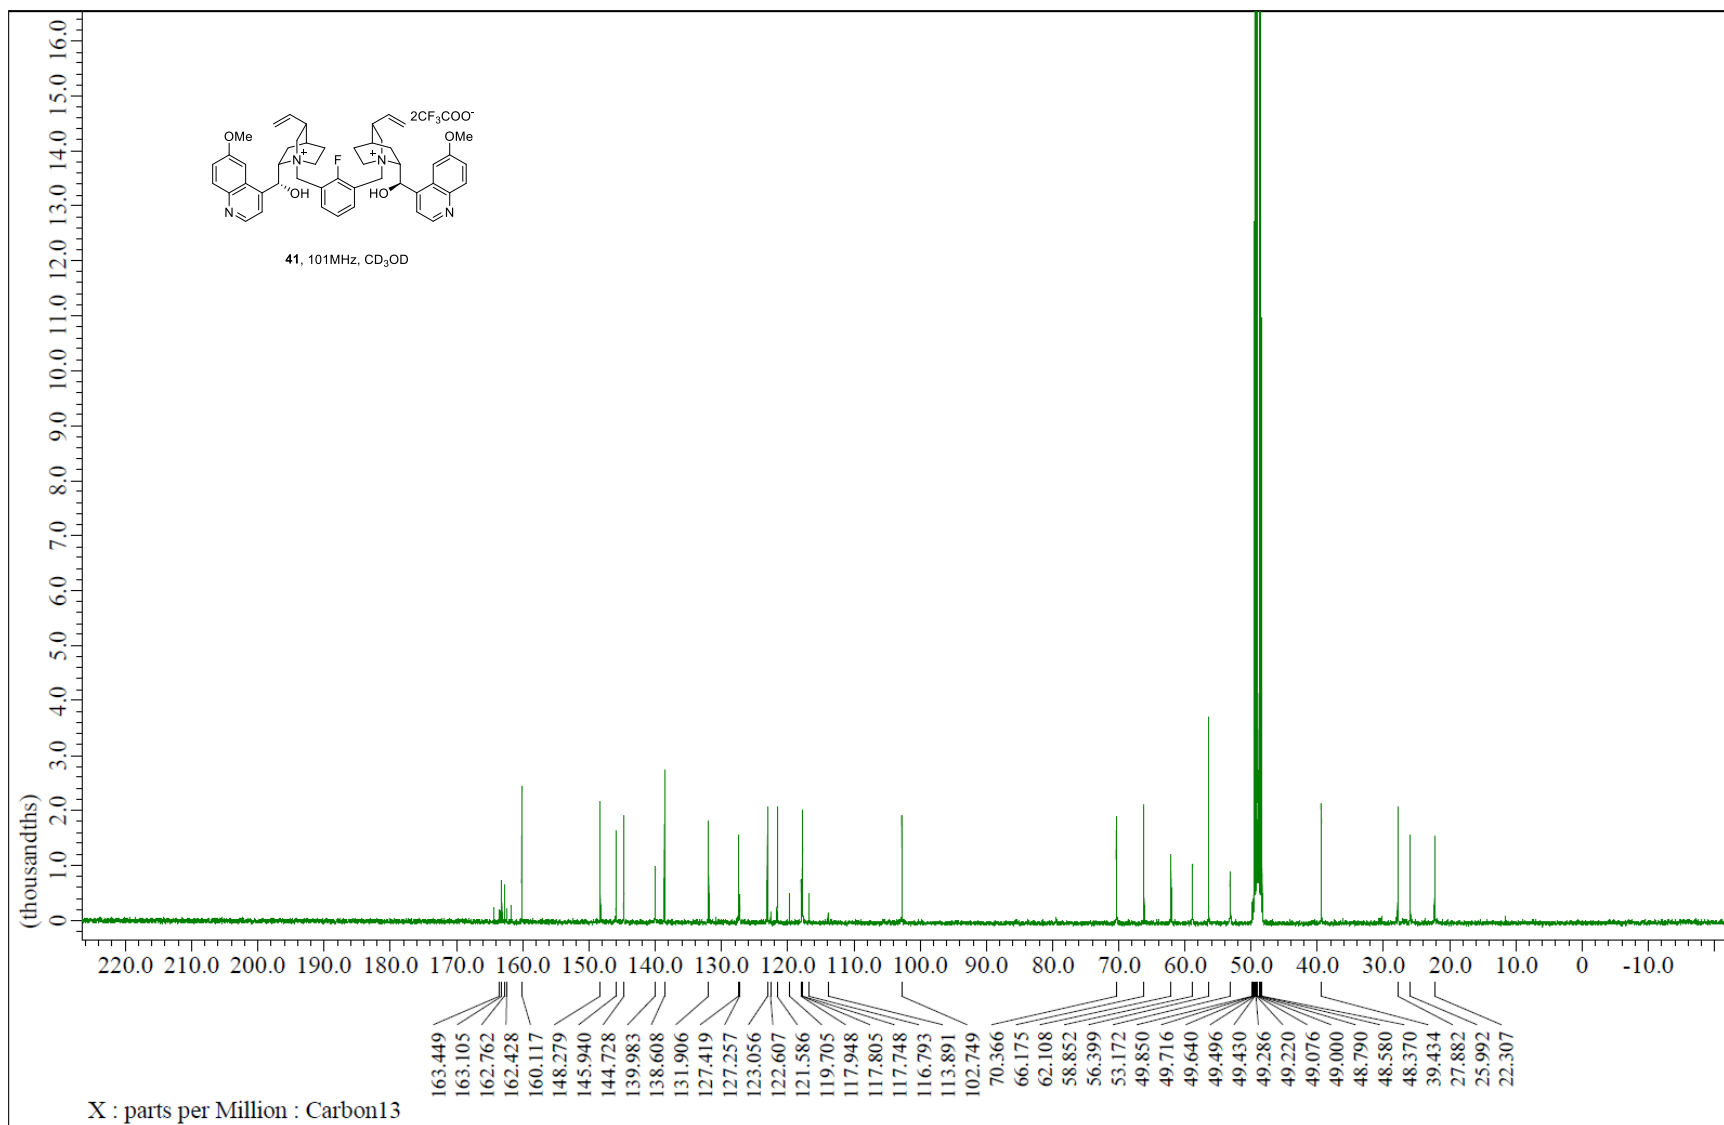



<sup>1</sup>H-NMR of compound 42

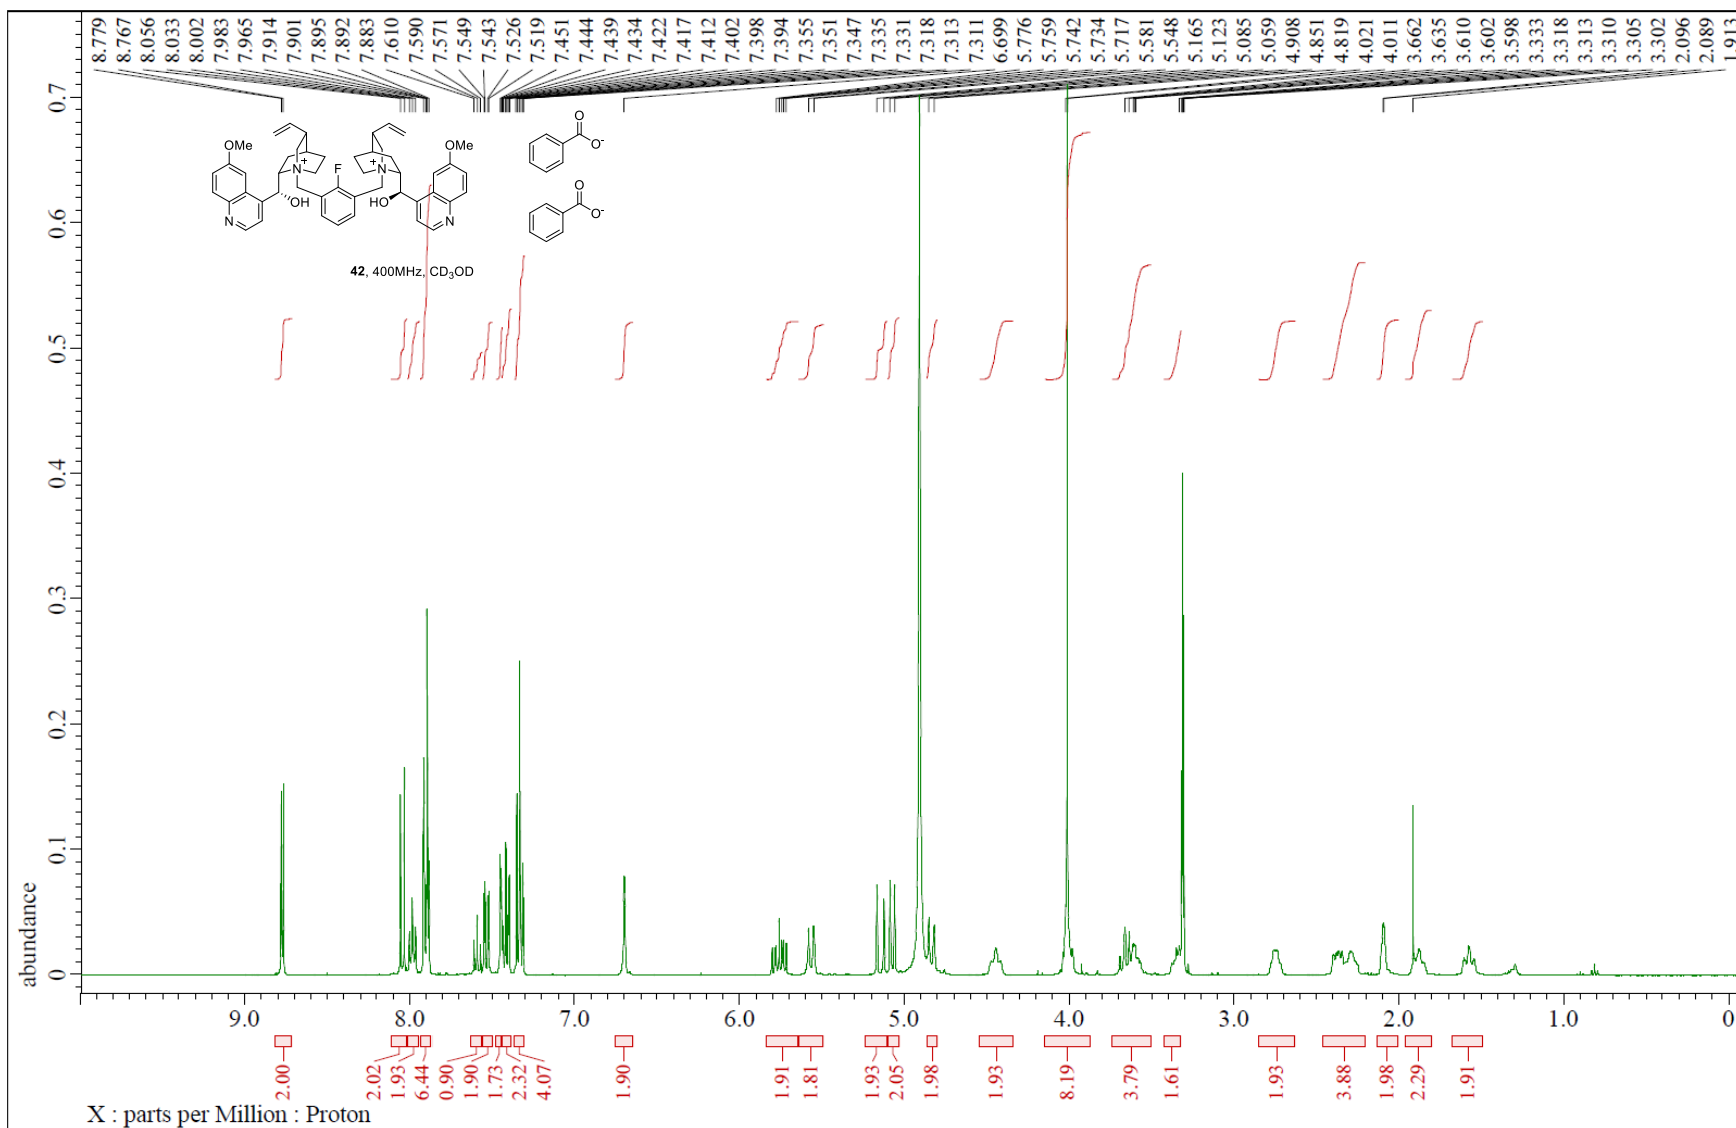

<sup>13</sup>C-NMR of compound **42**

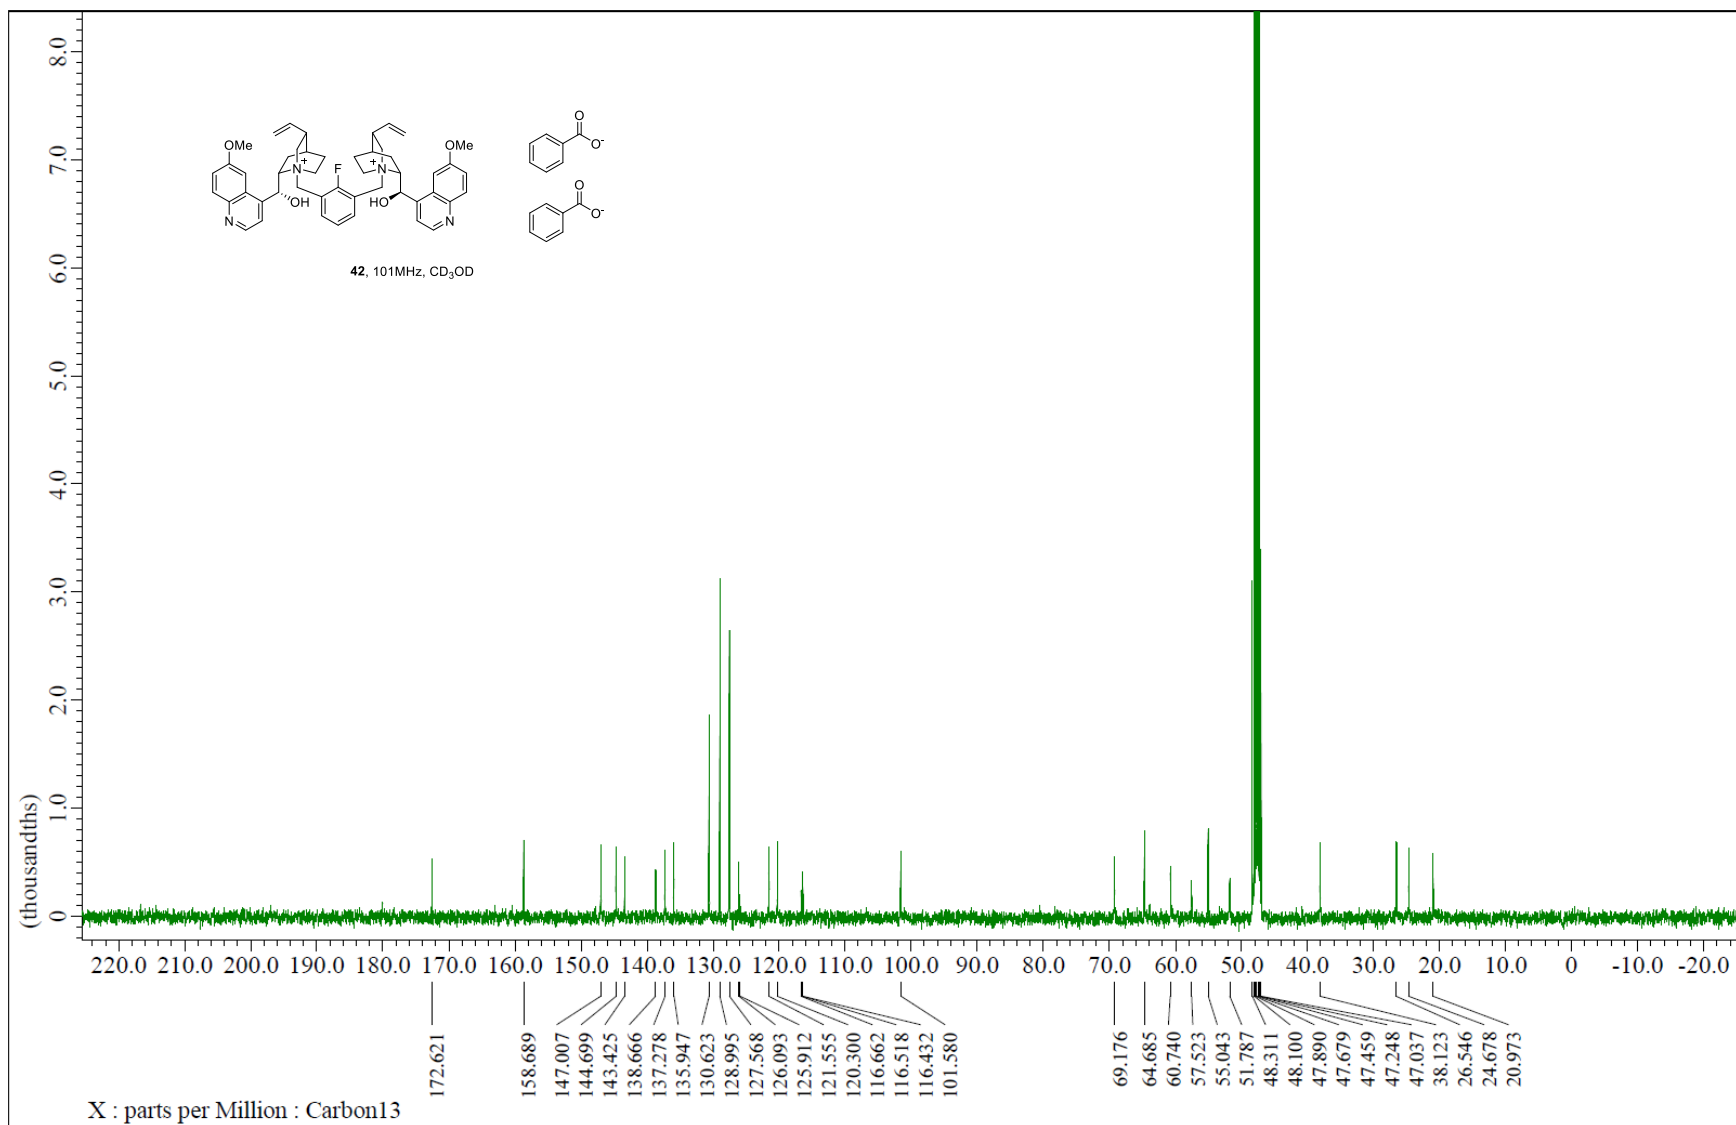

<sup>1</sup>H-NMR of compound 43

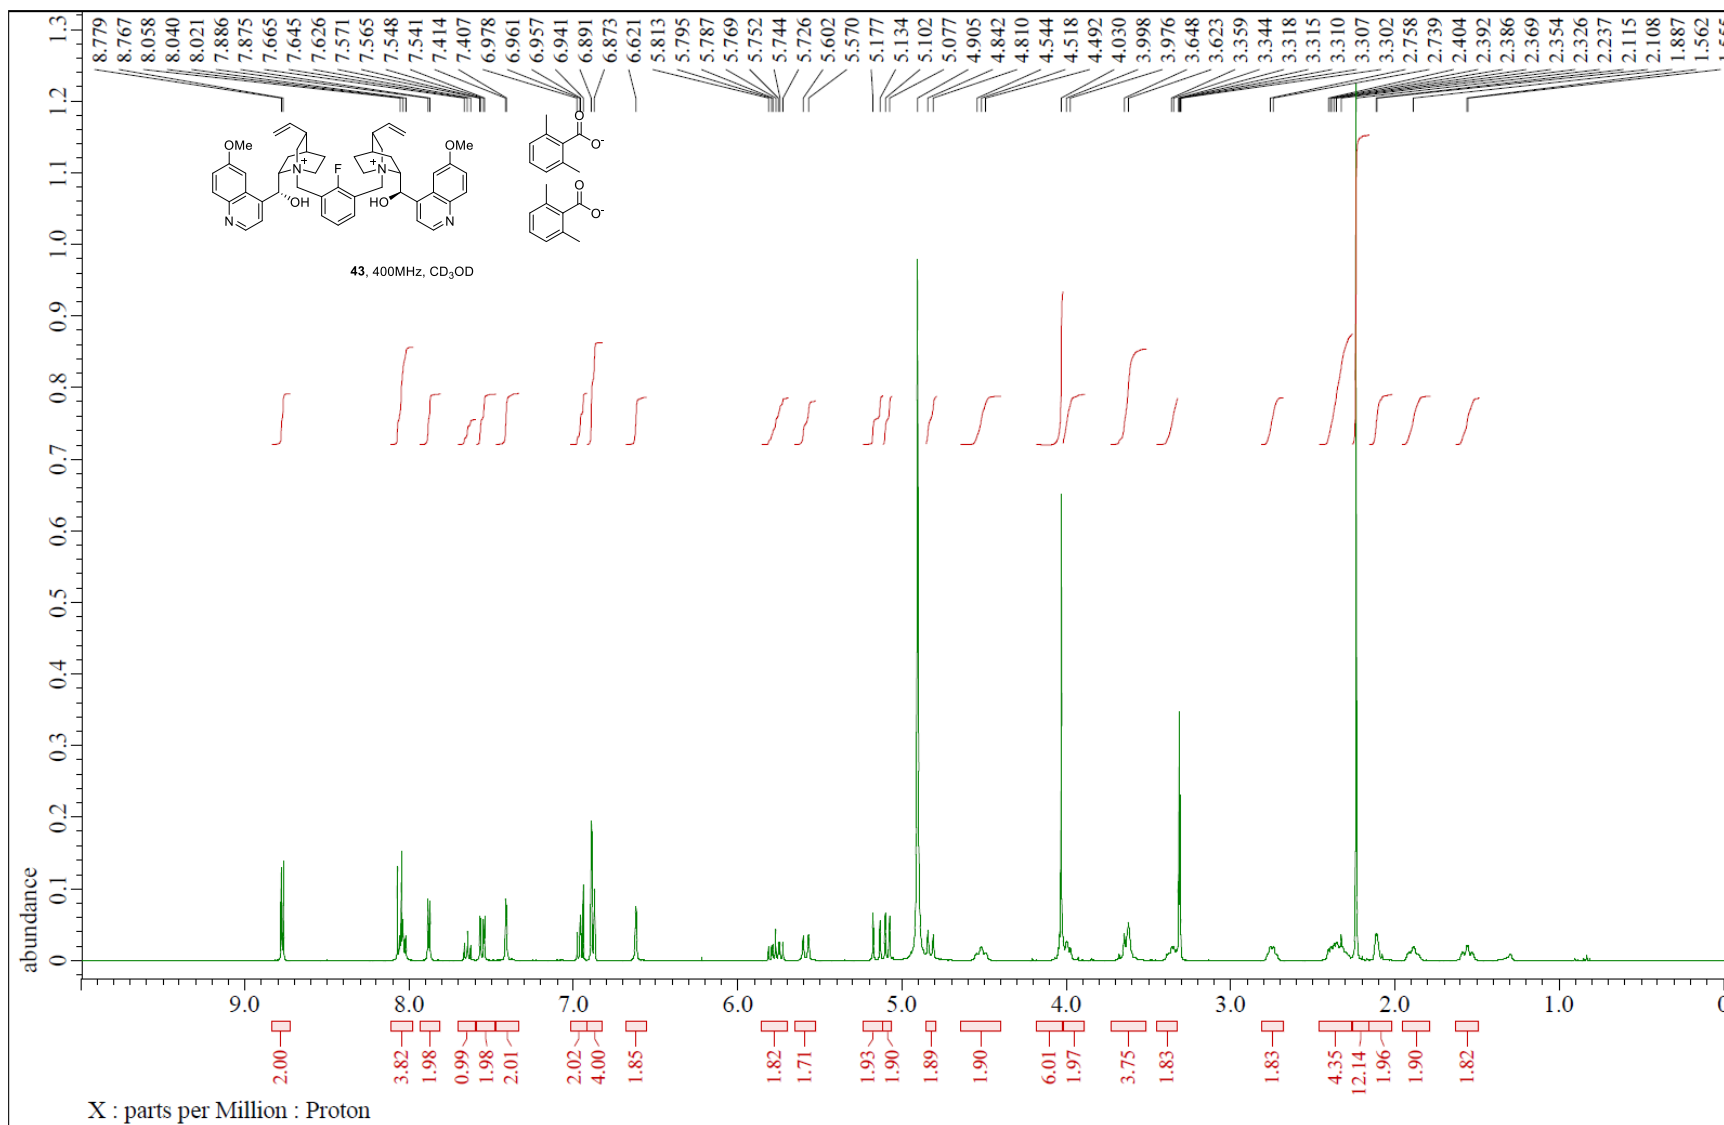

<sup>13</sup>C-NMR of compound **43**

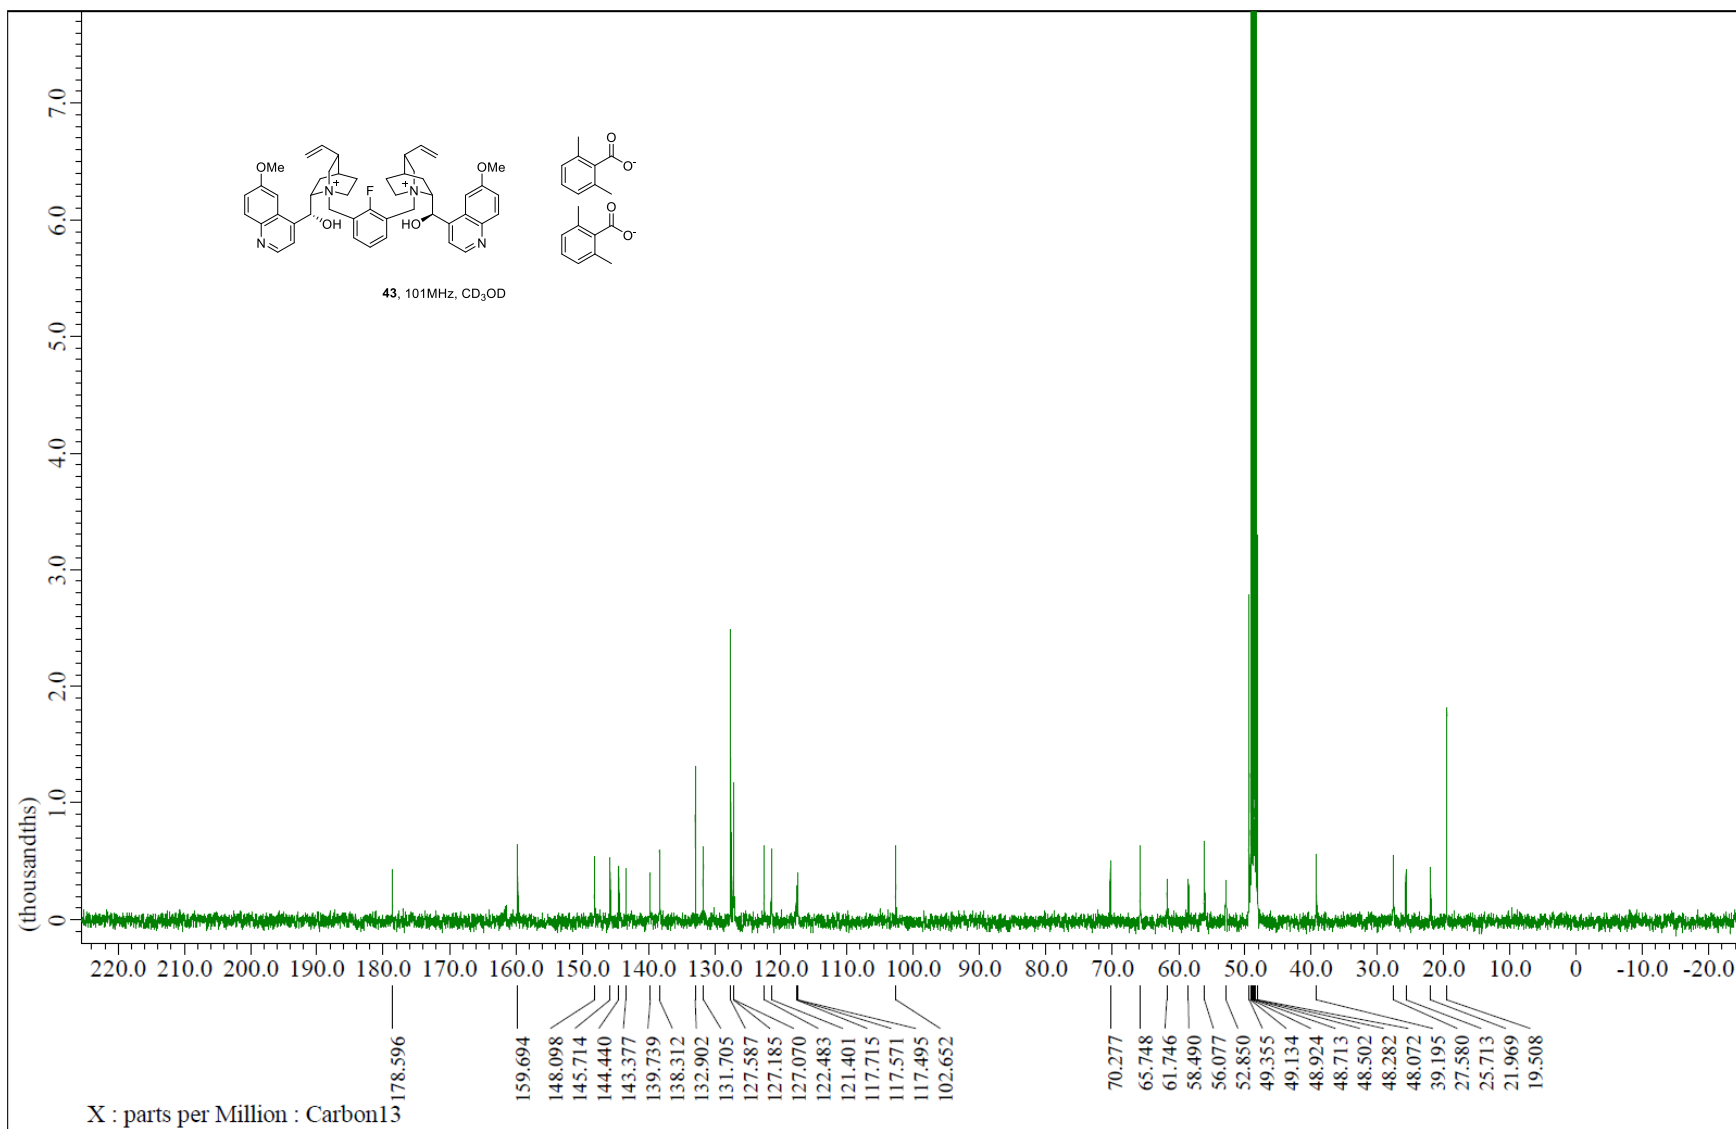

<sup>1</sup>H-NMR of compound 44

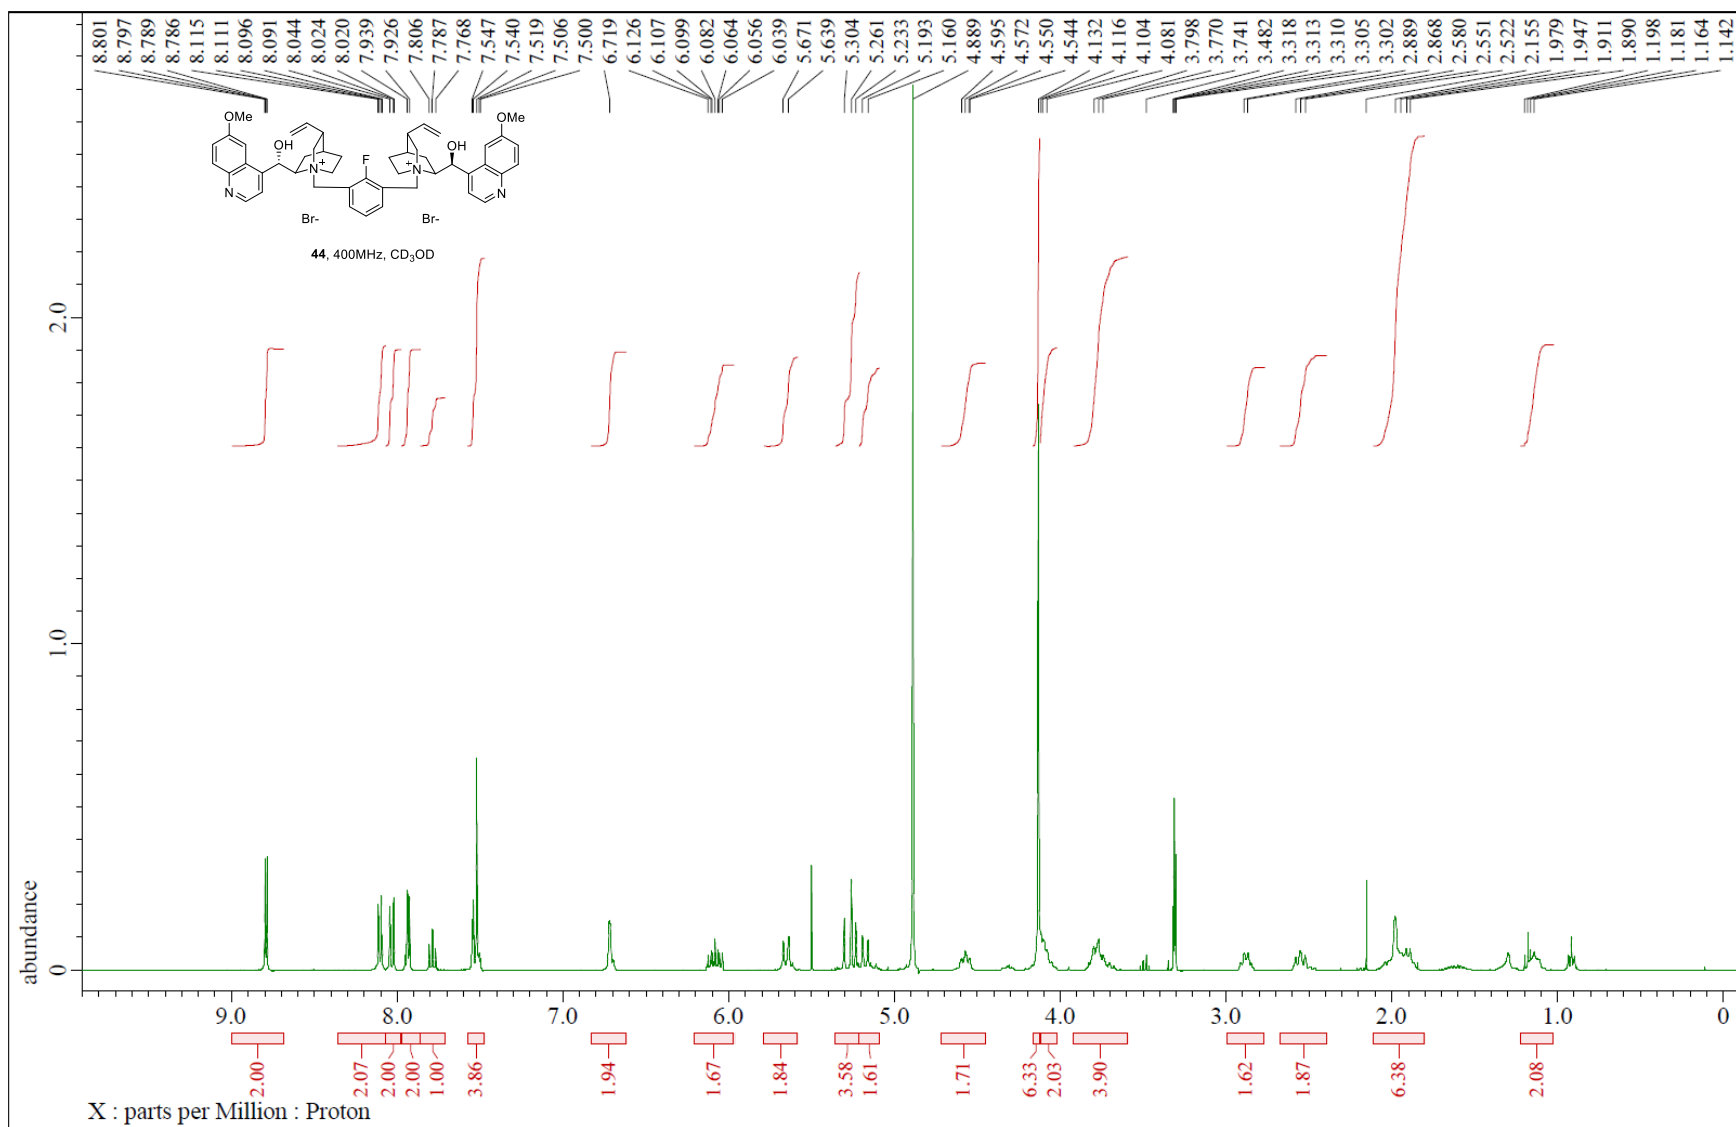

<sup>13</sup>C-NMR of compound **44**

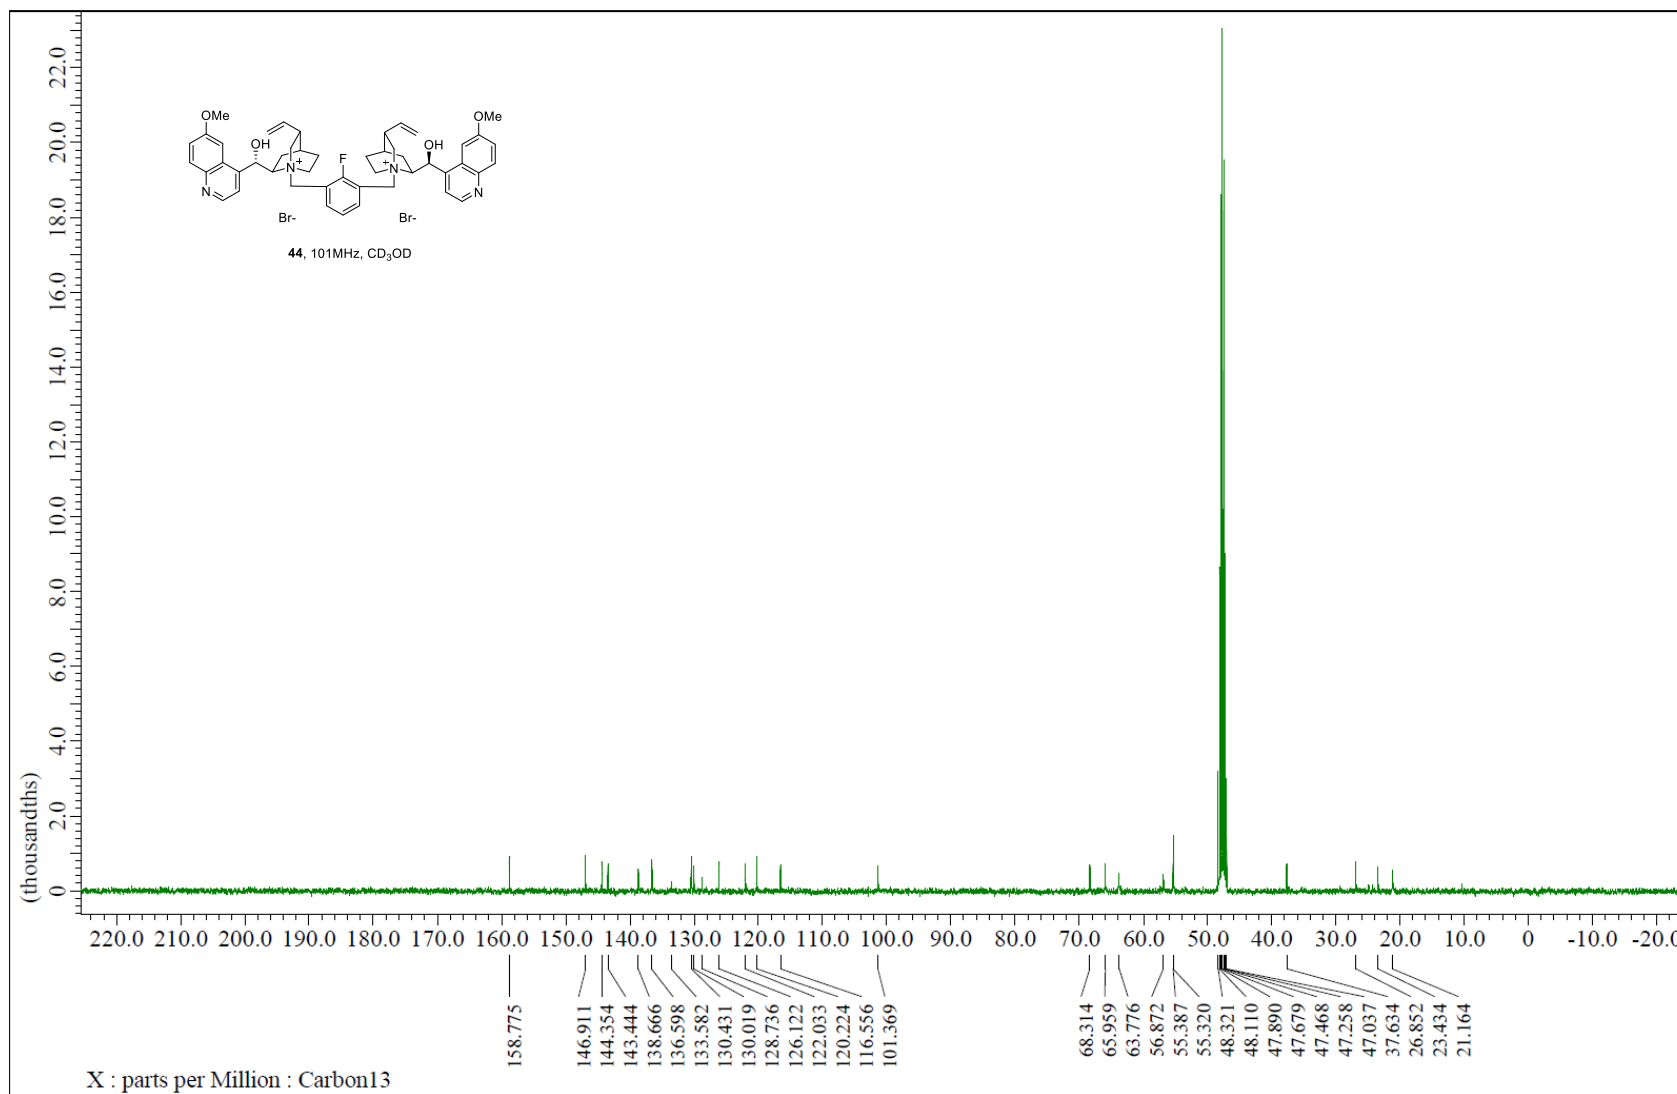

<sup>1</sup>H-NMR of compound S8

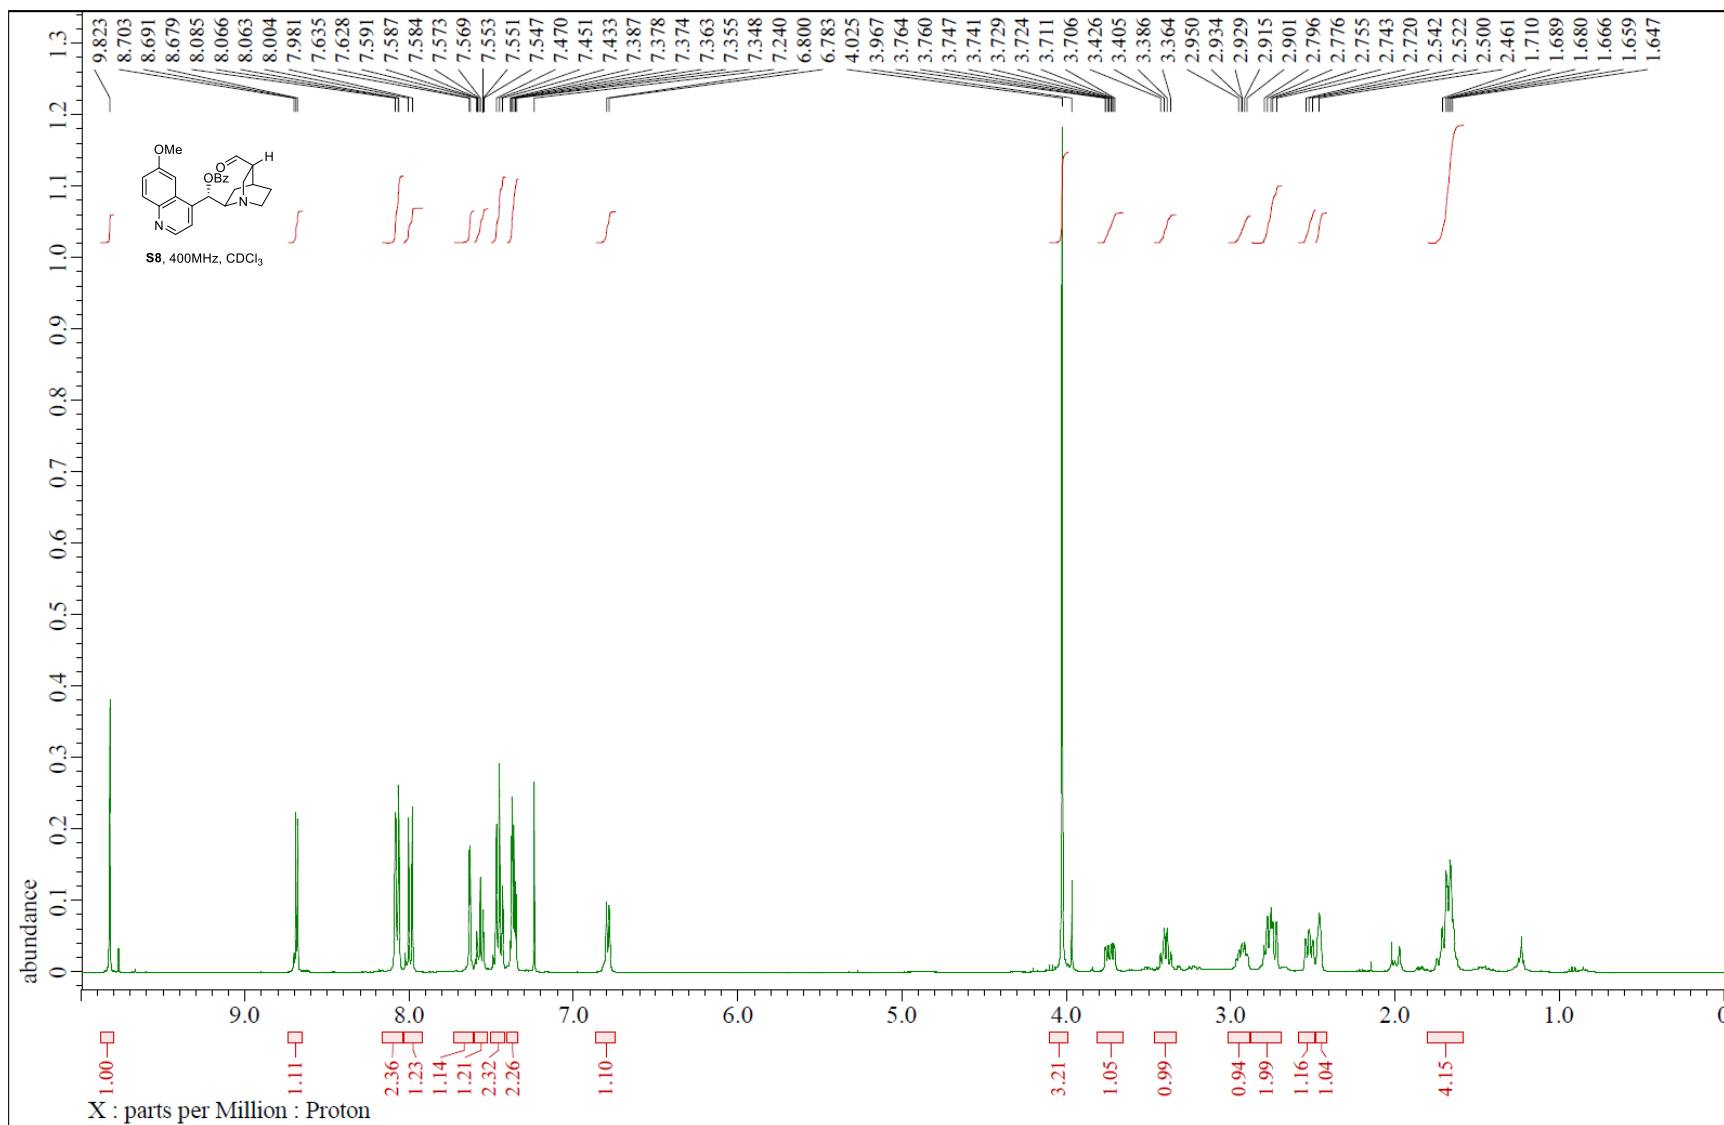

<sup>13</sup>C-NMR of compound **S8**

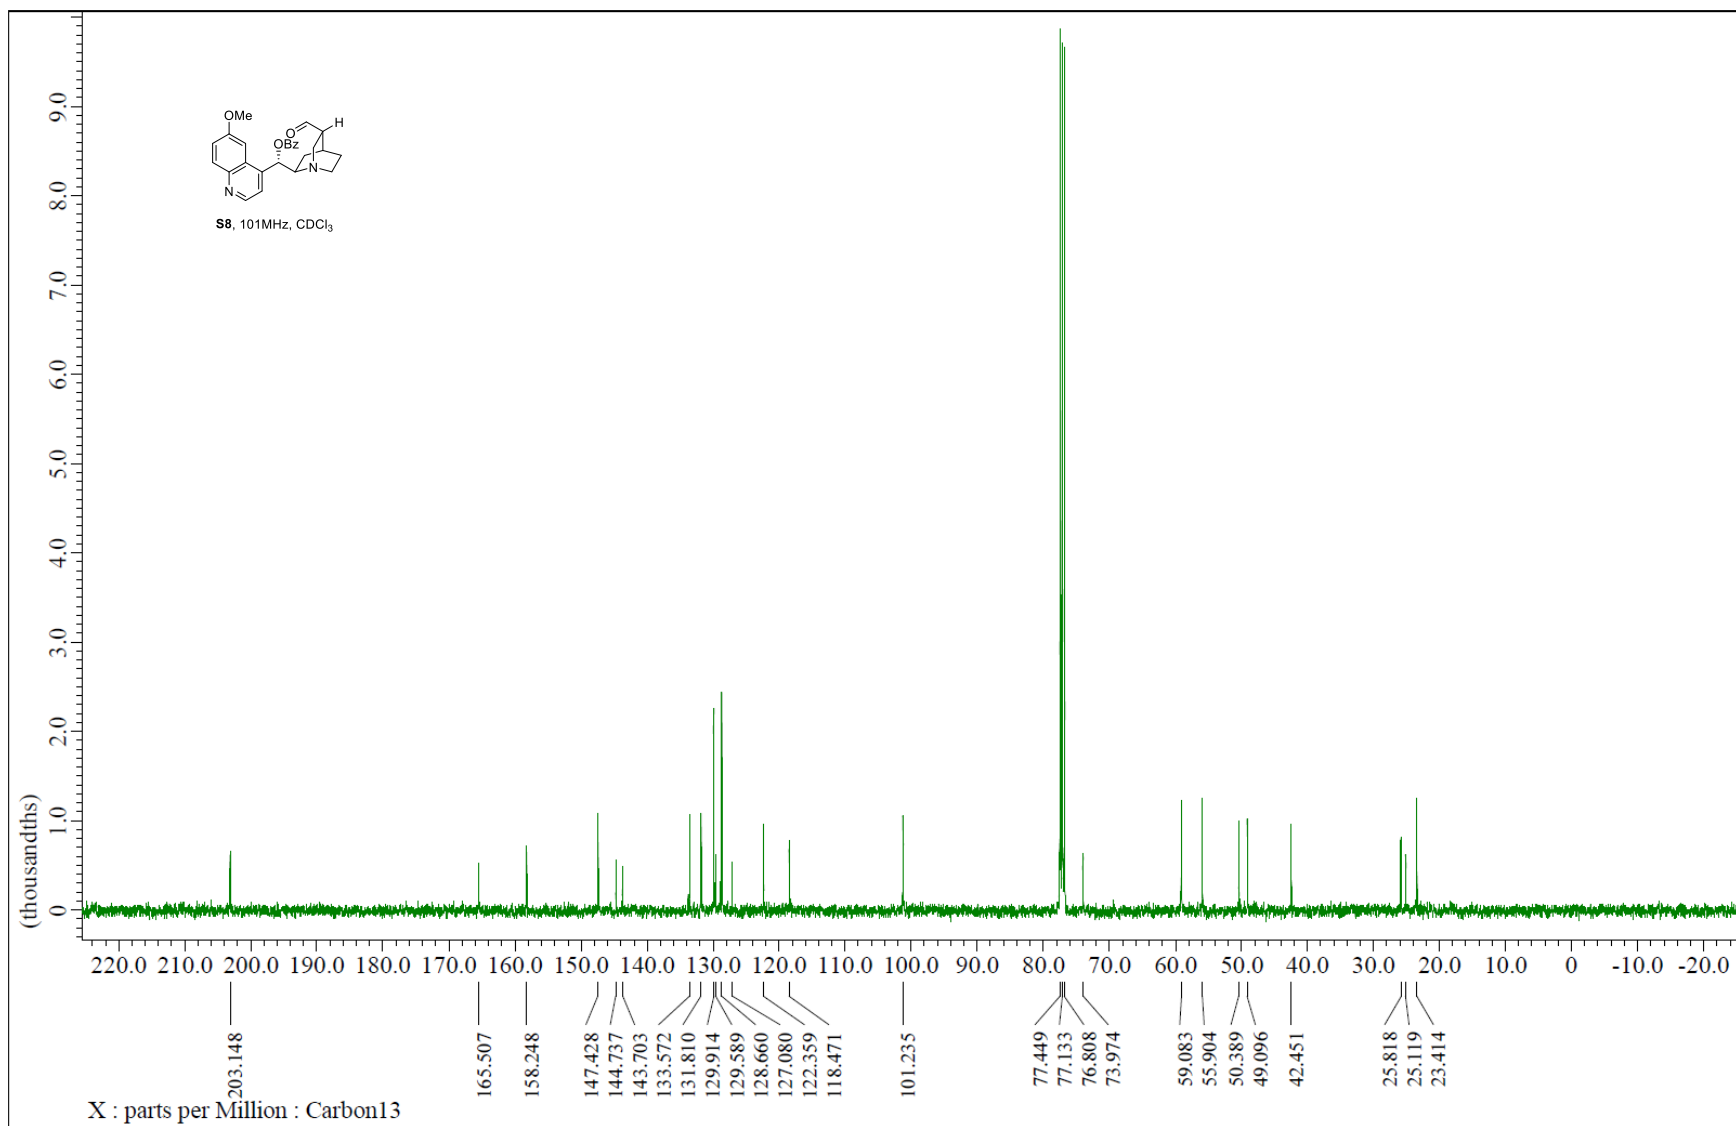



<sup>1</sup>H-NMR of compound S9

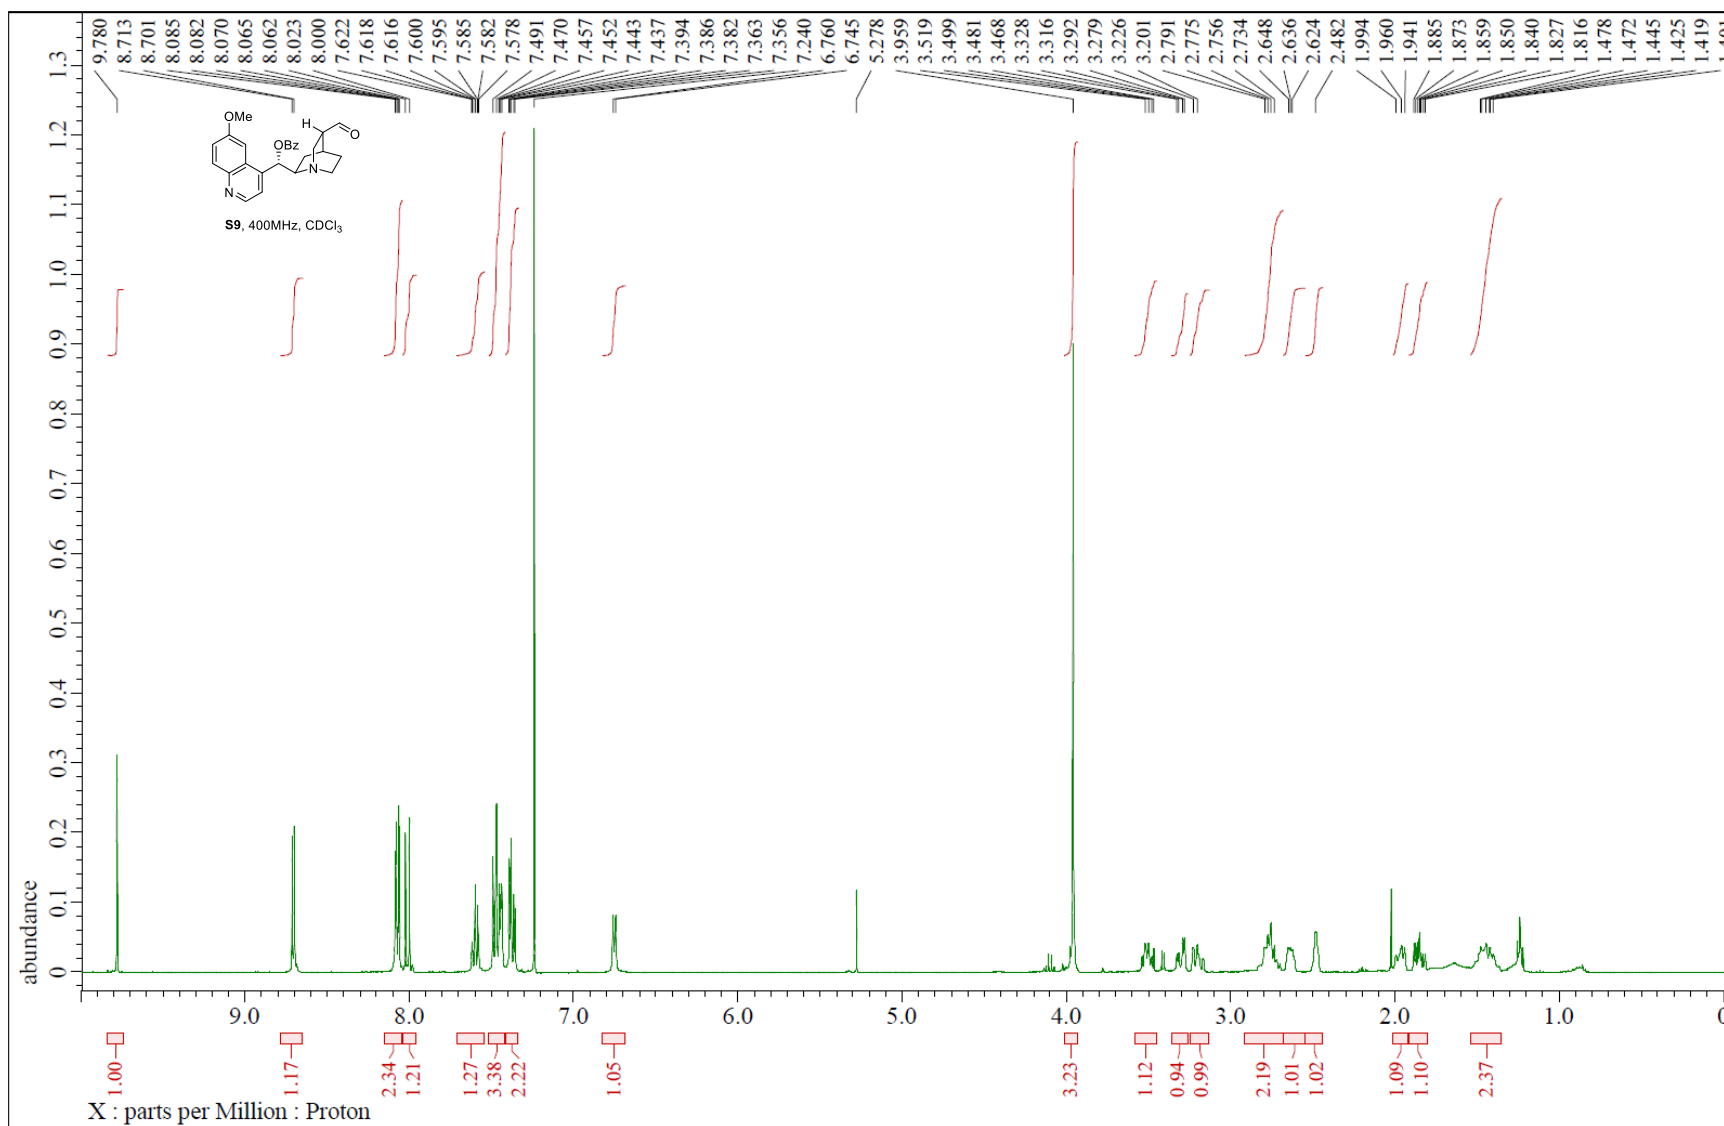

<sup>13</sup>C-NMR of compound **S9**

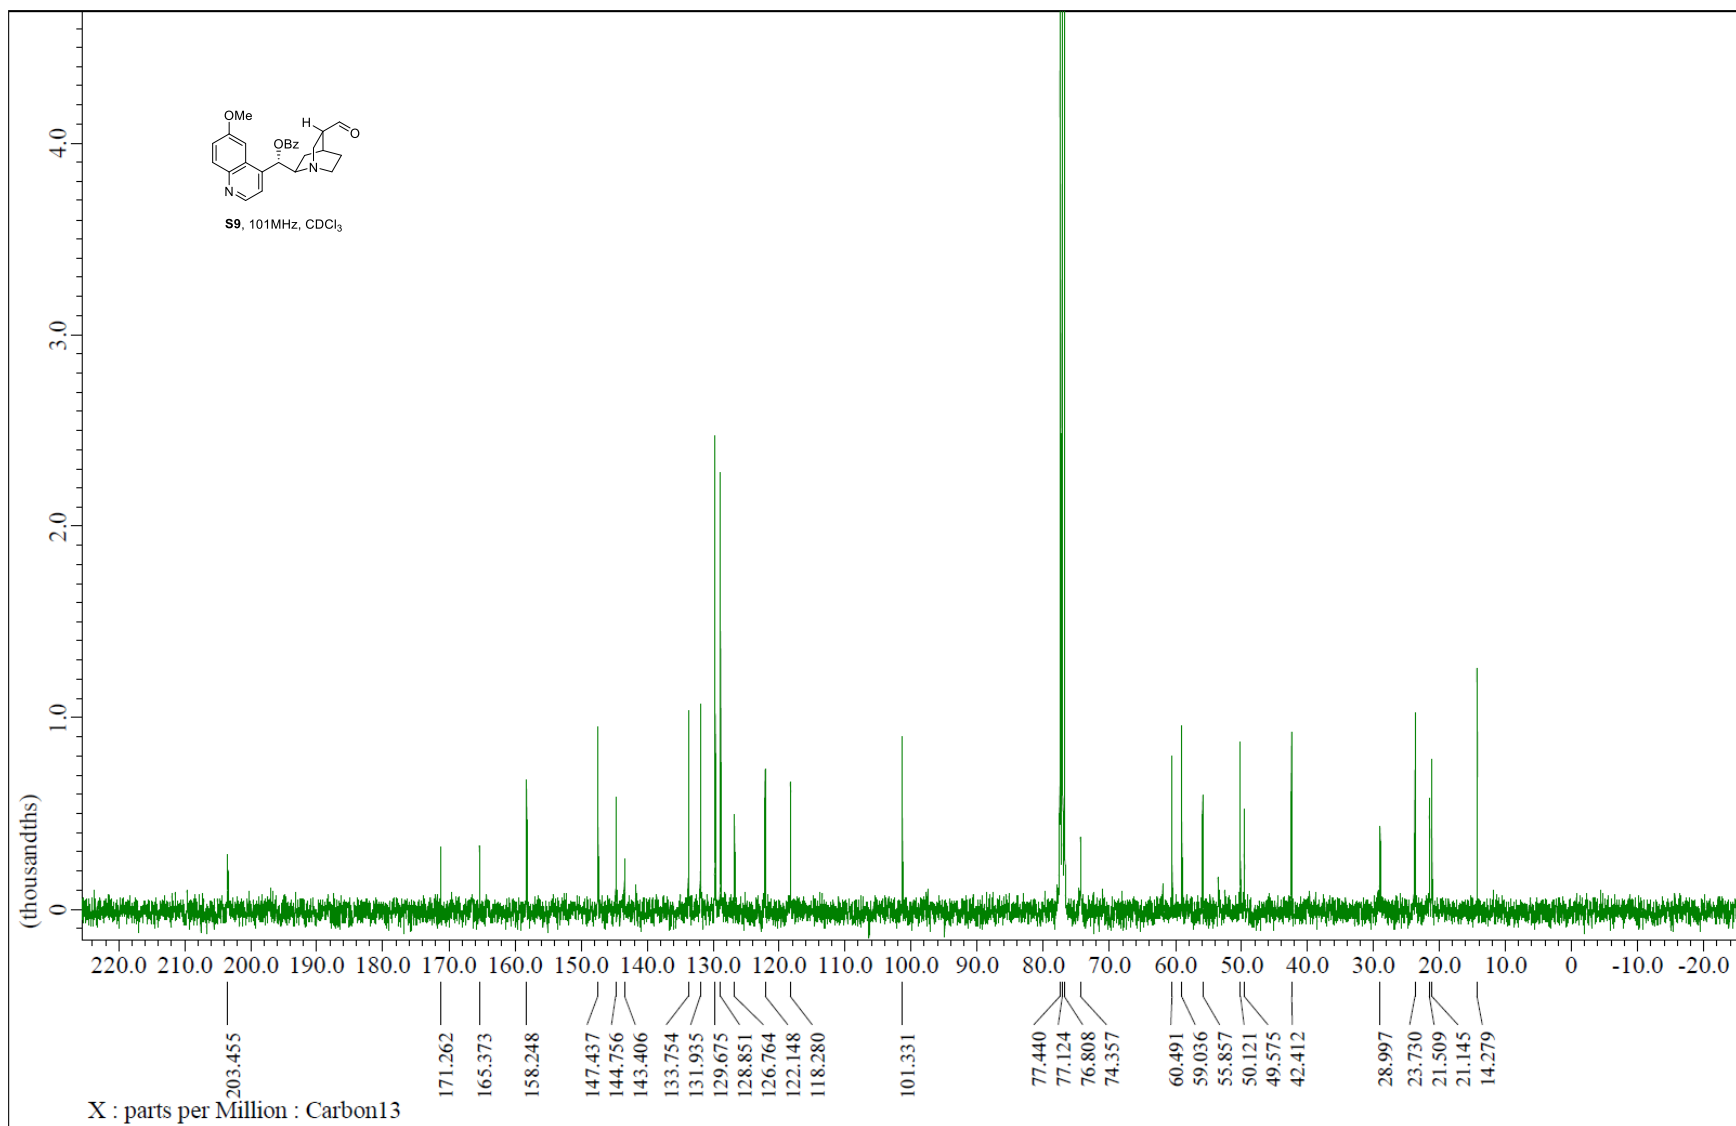

<sup>1</sup>H-NMR of compound **S10**

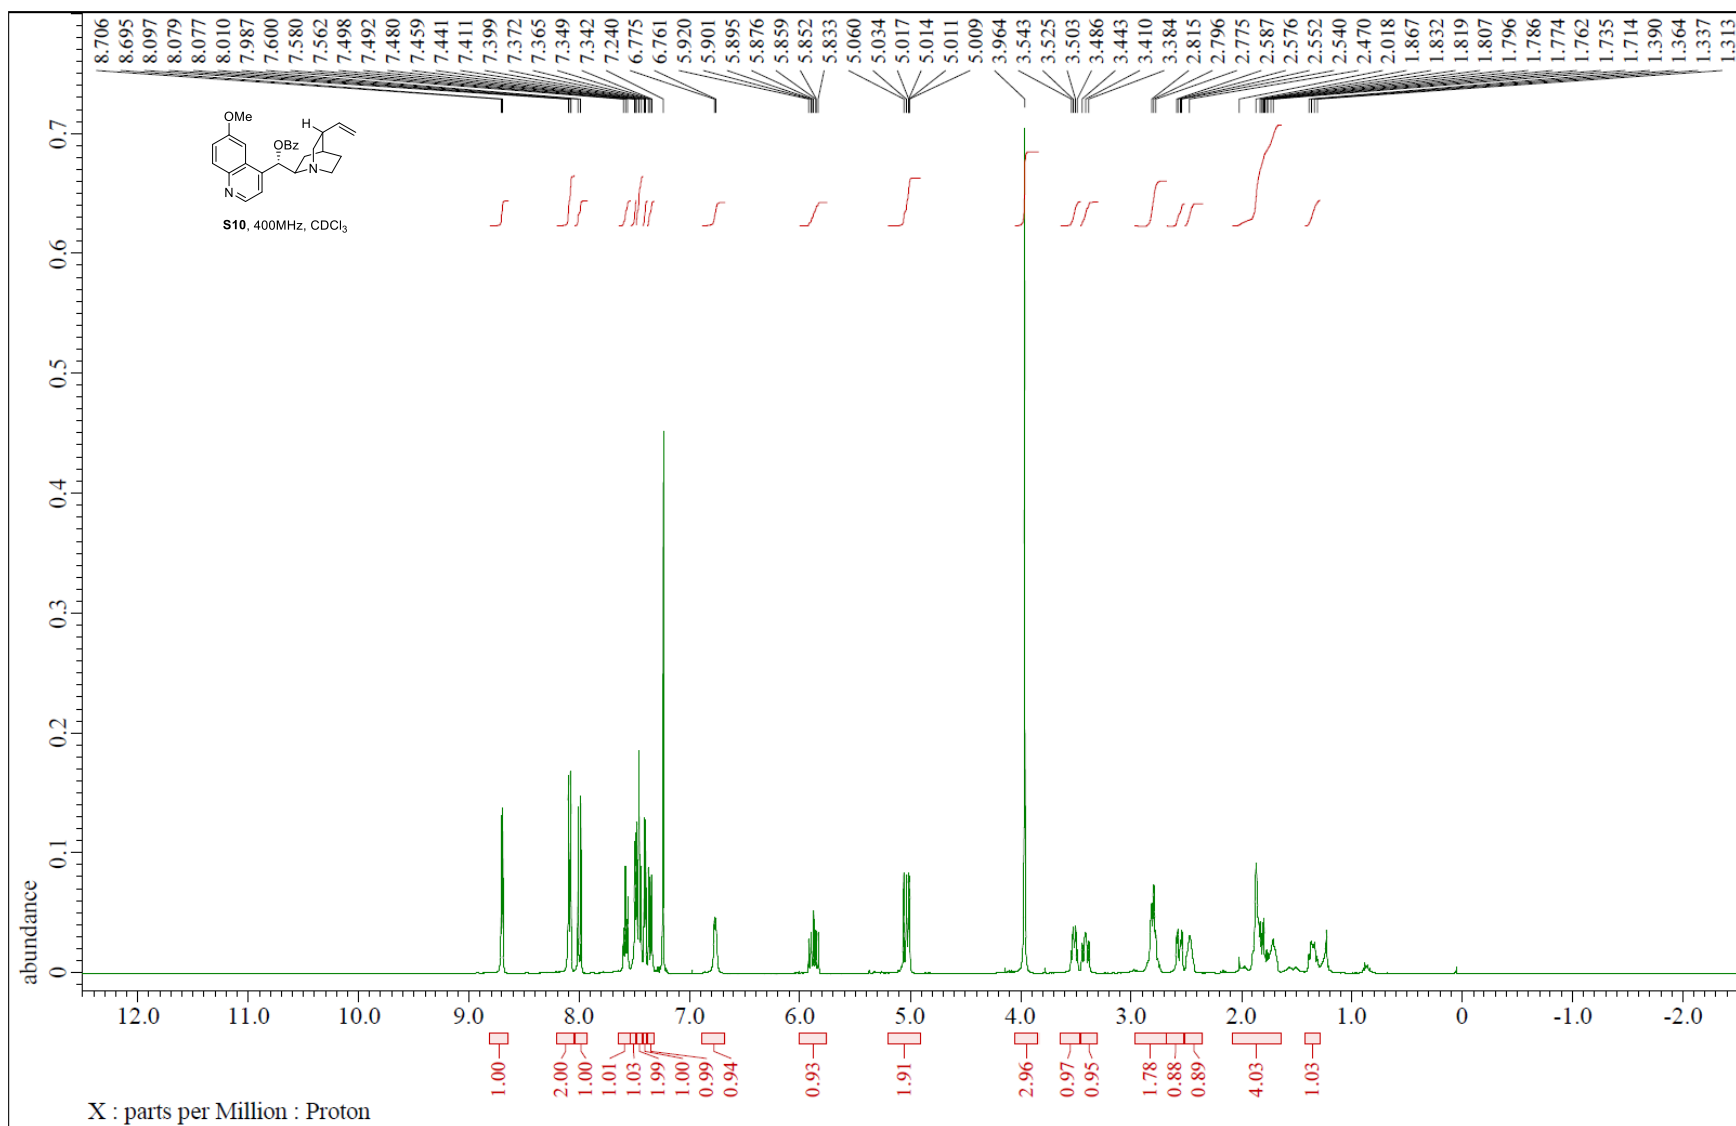

<sup>13</sup>C-NMR of compound **S10**

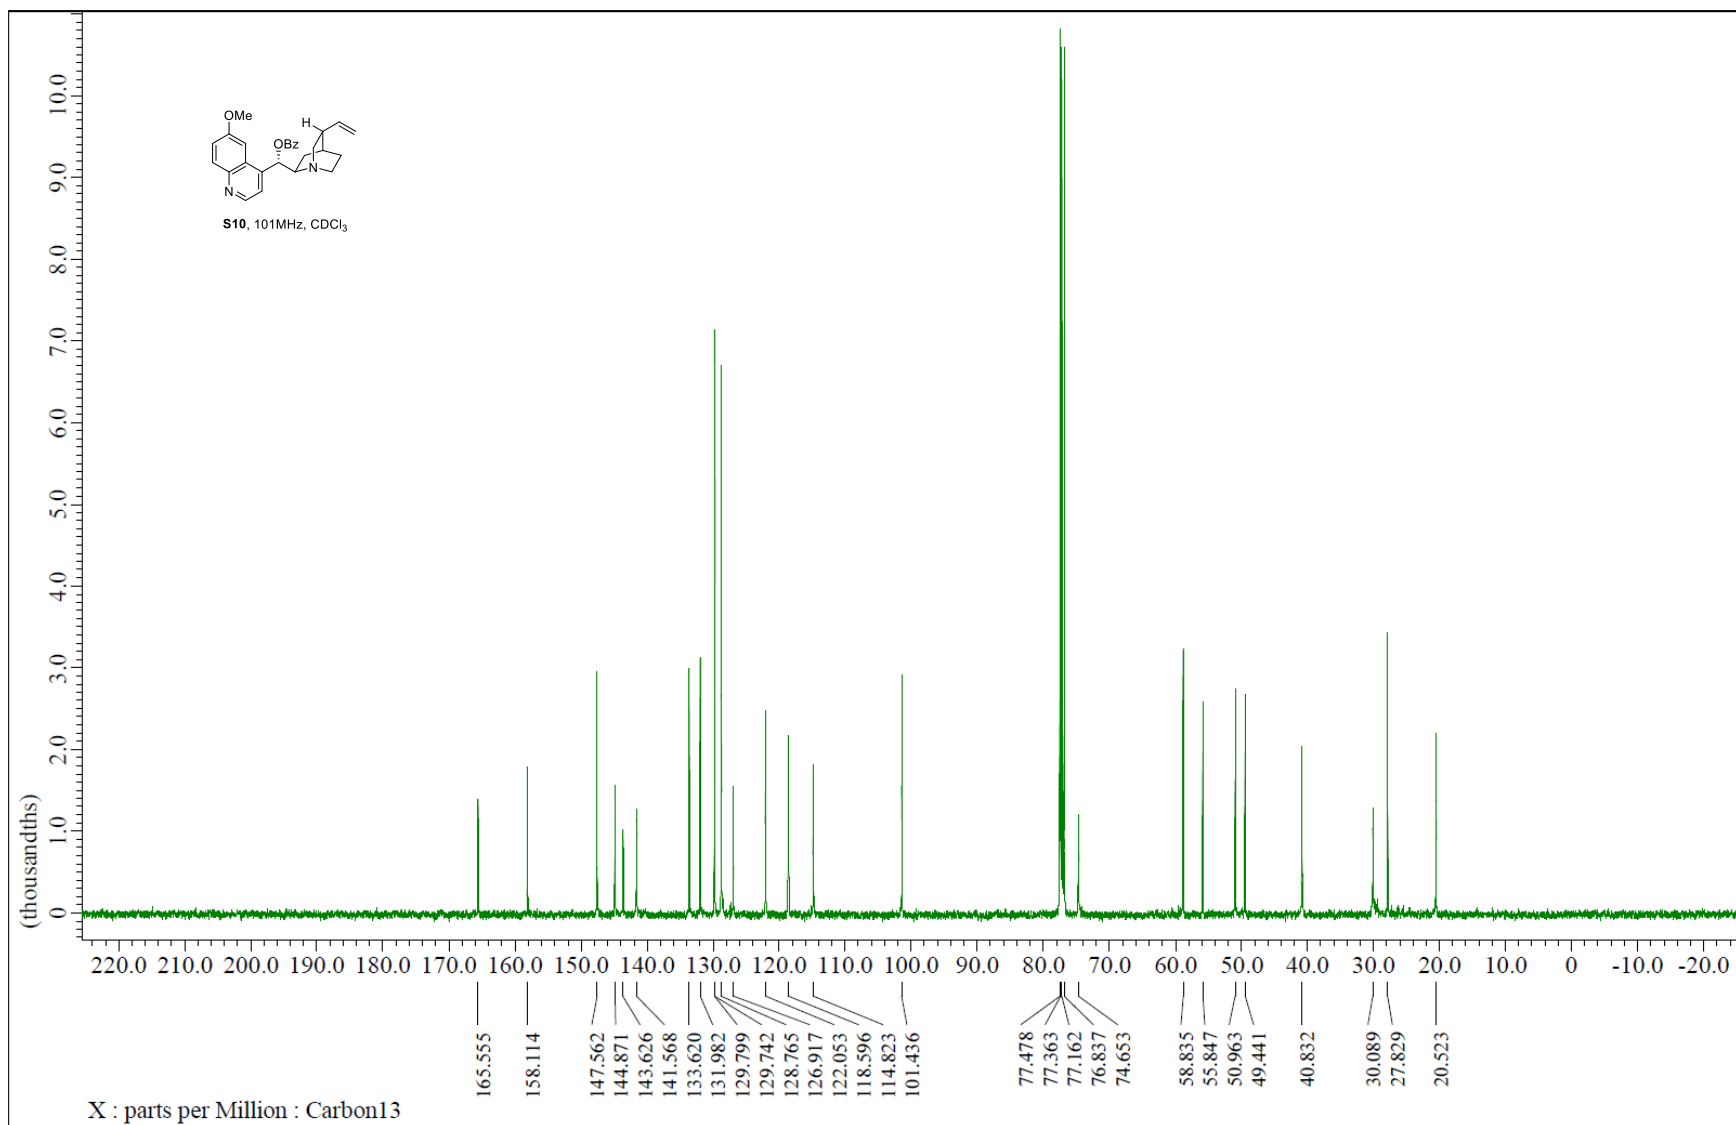

<sup>1</sup>H-NMR of compound **S11**

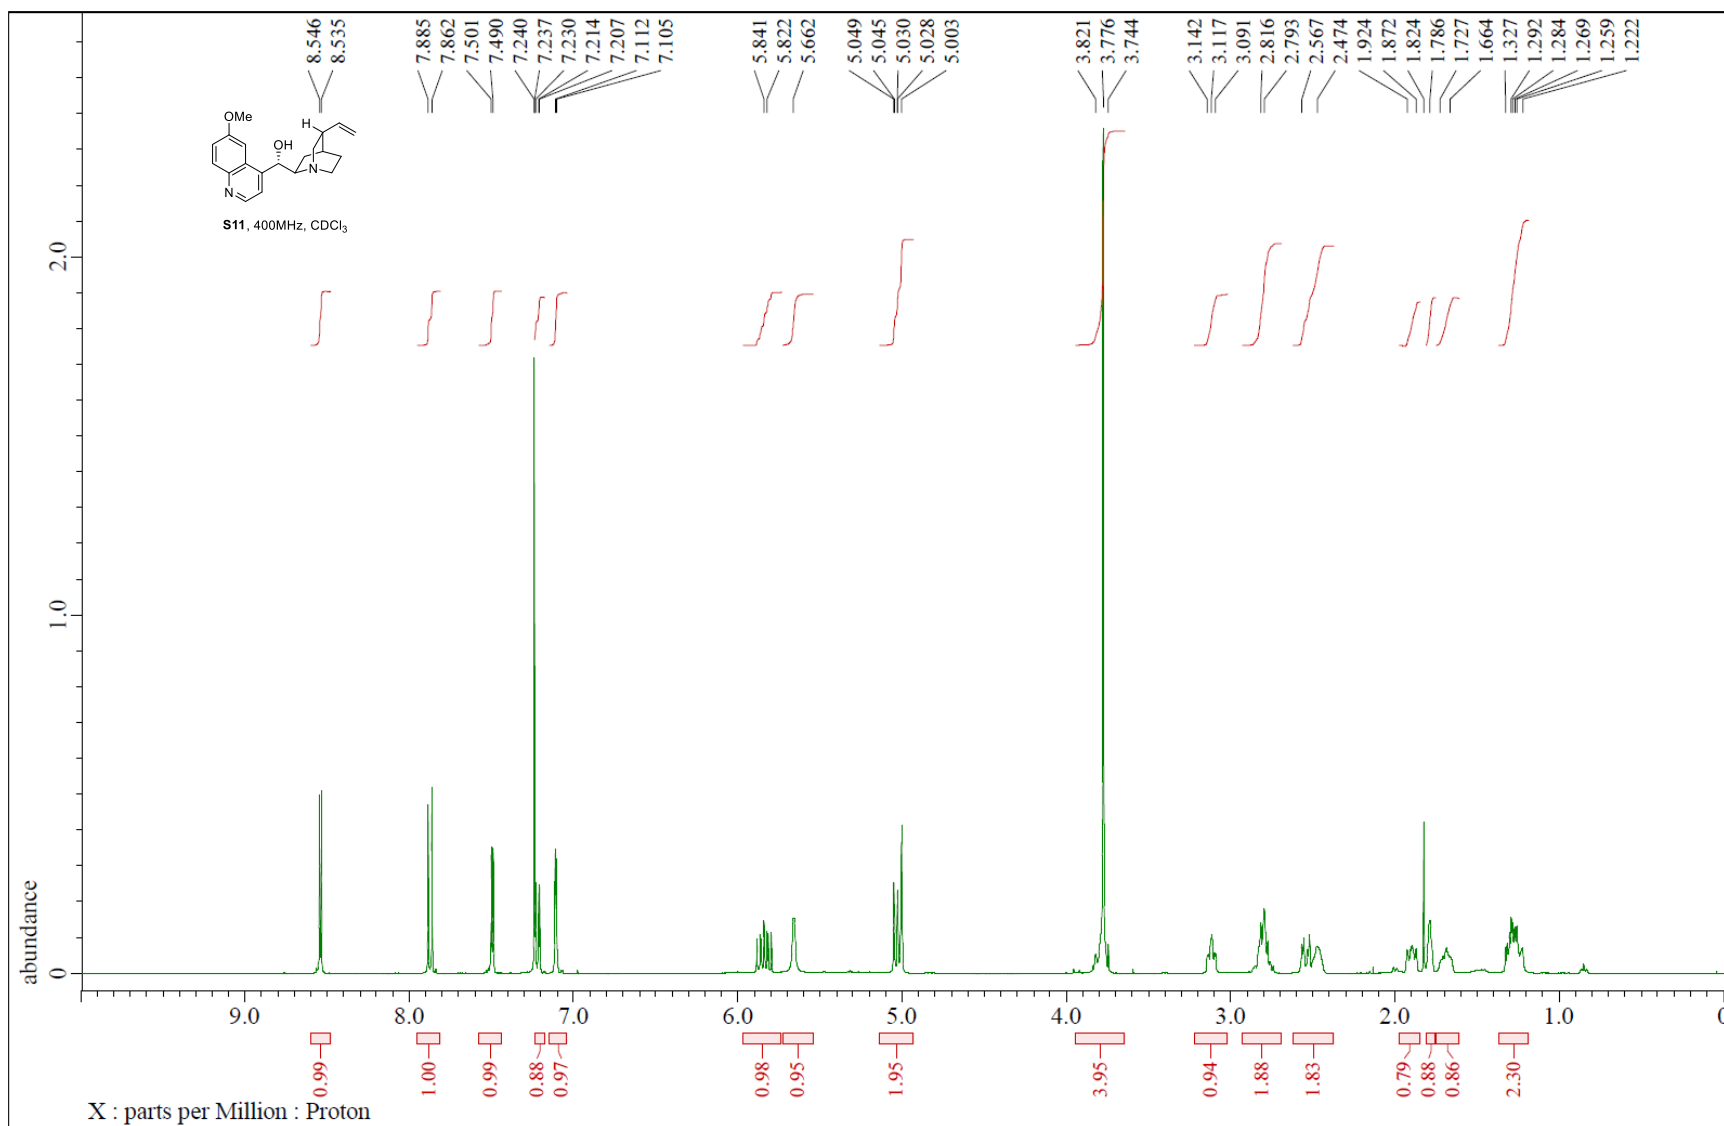

<sup>13</sup>C-NMR of compound **S11**

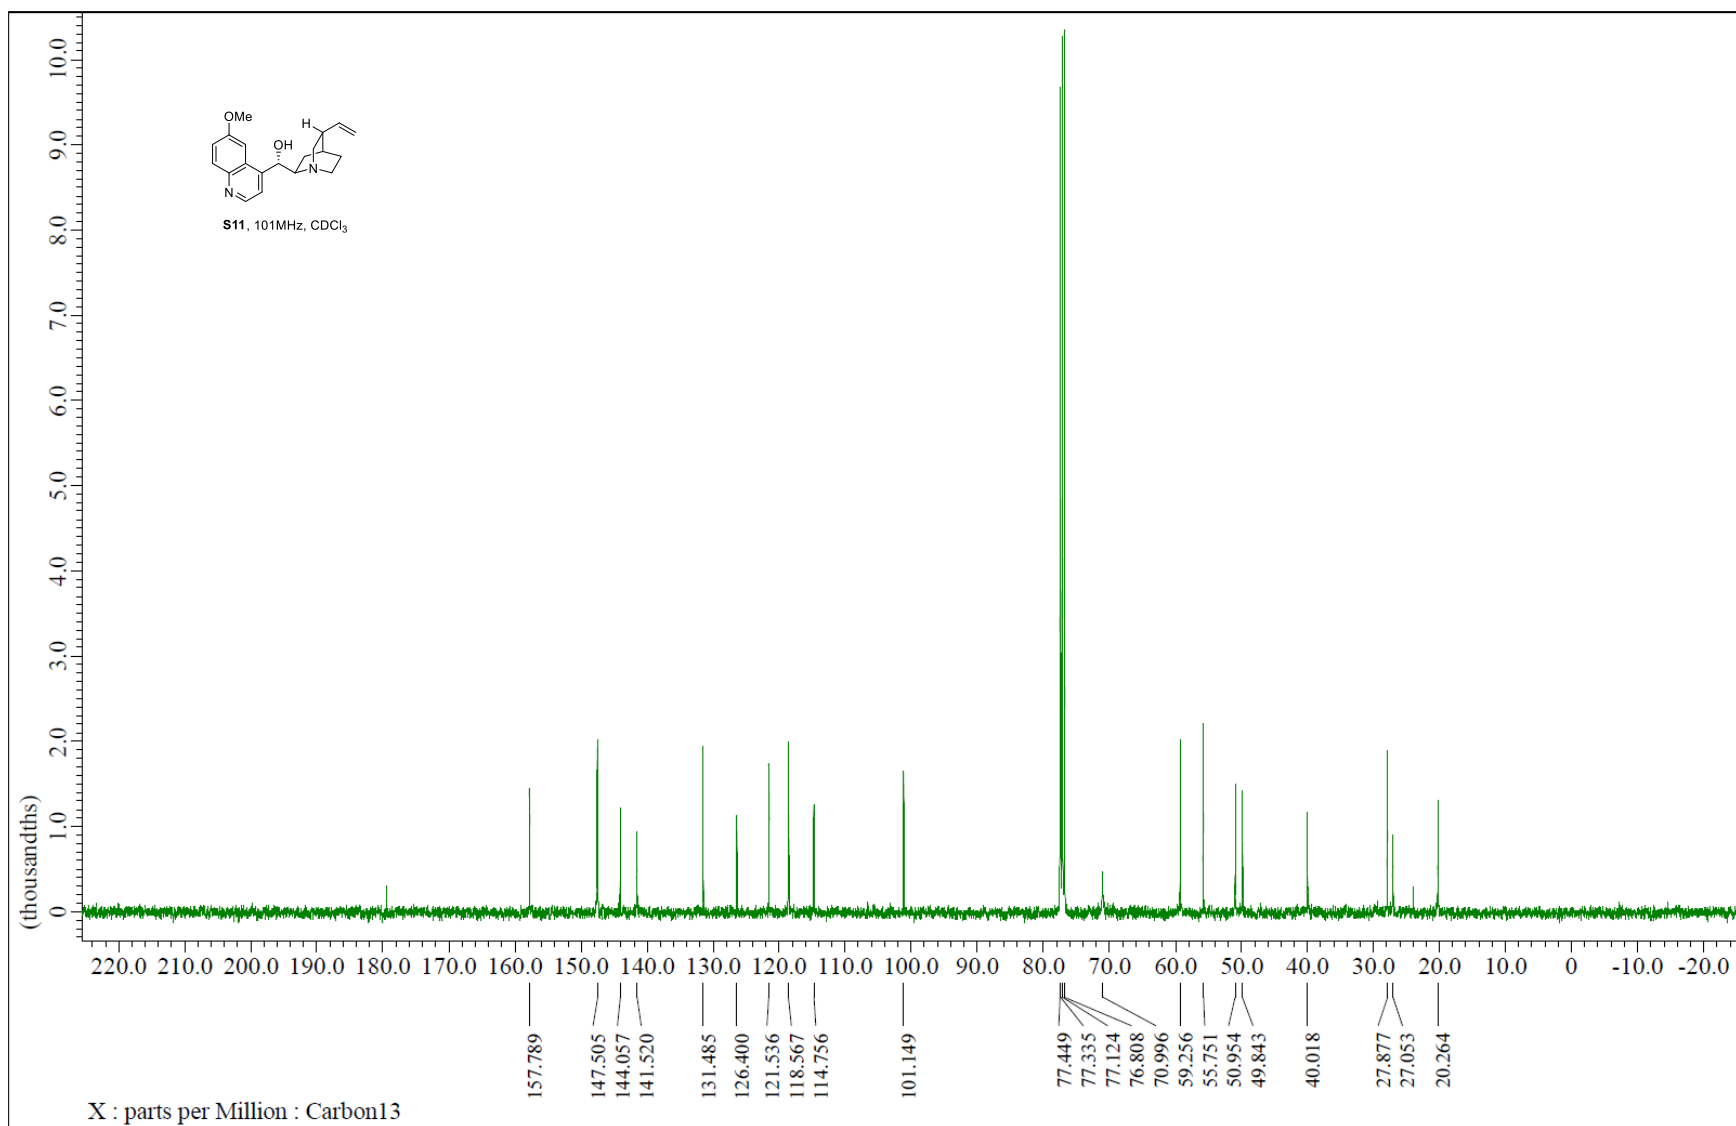

<sup>1</sup>H-NMR of compound 45

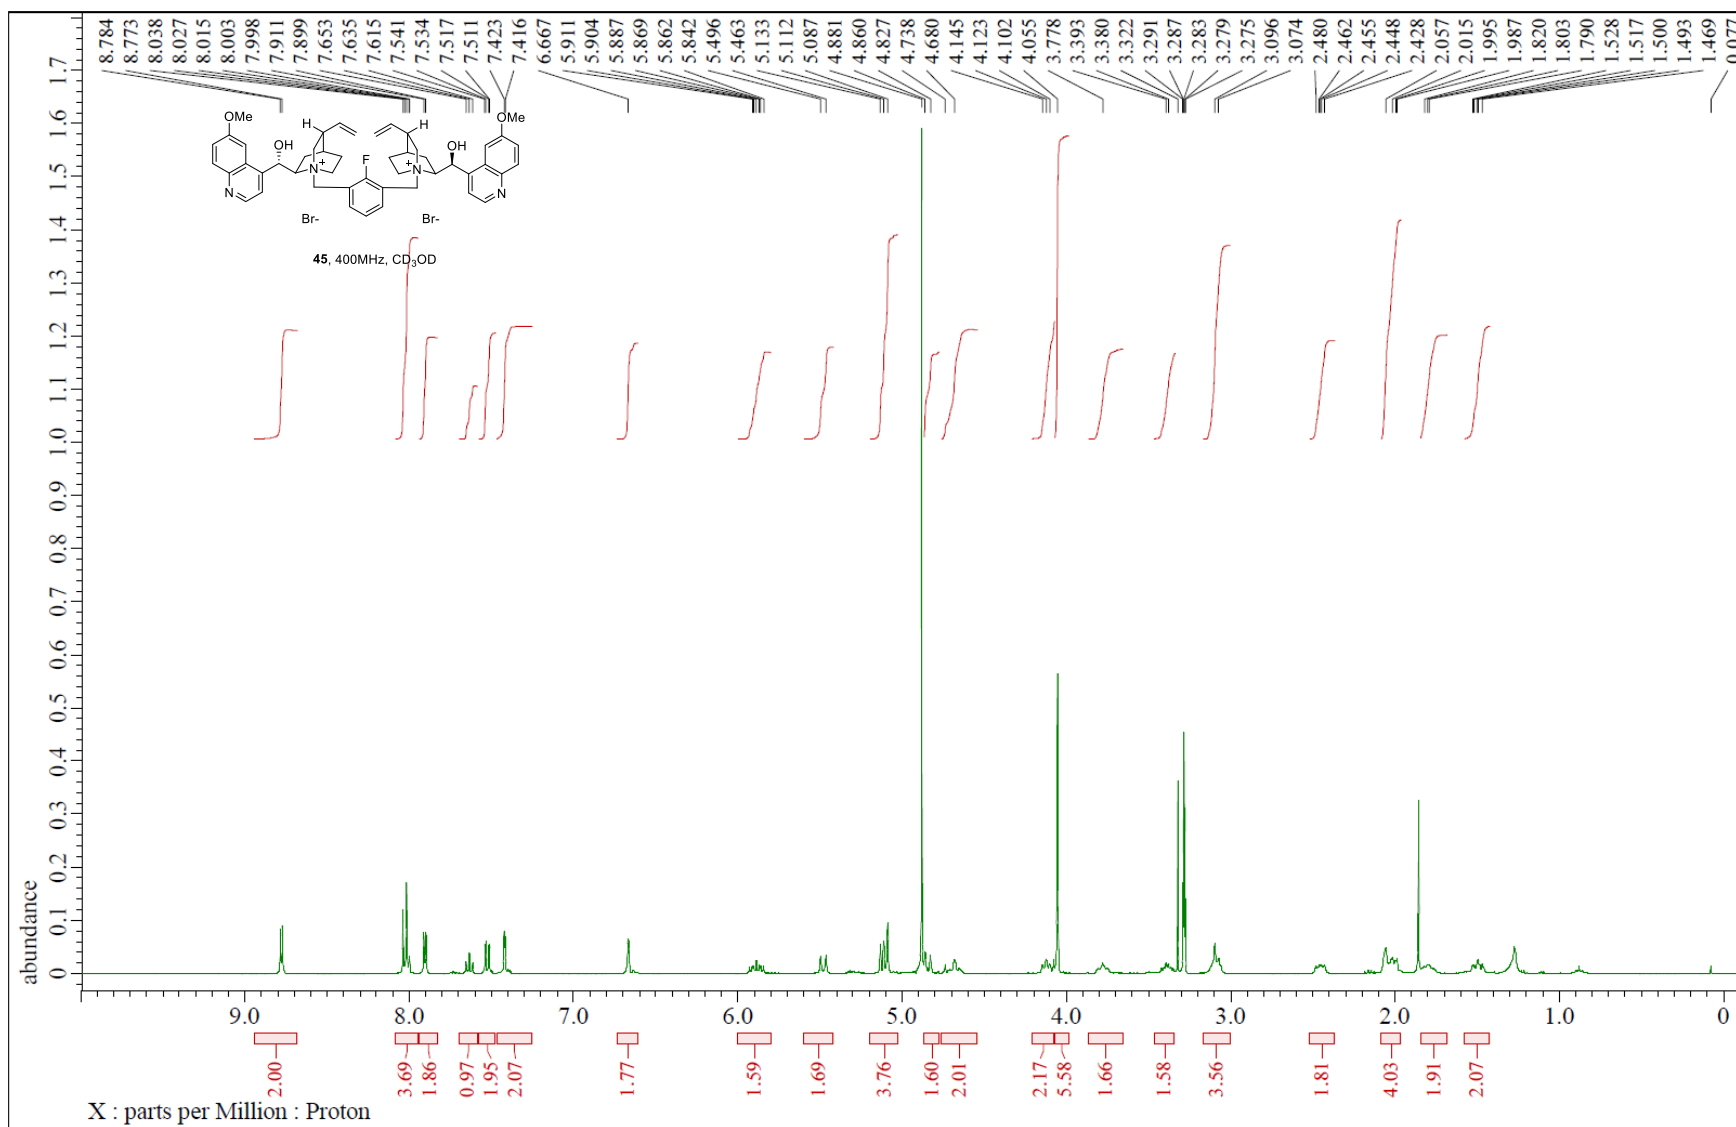

<sup>13</sup>C-NMR of compound 45

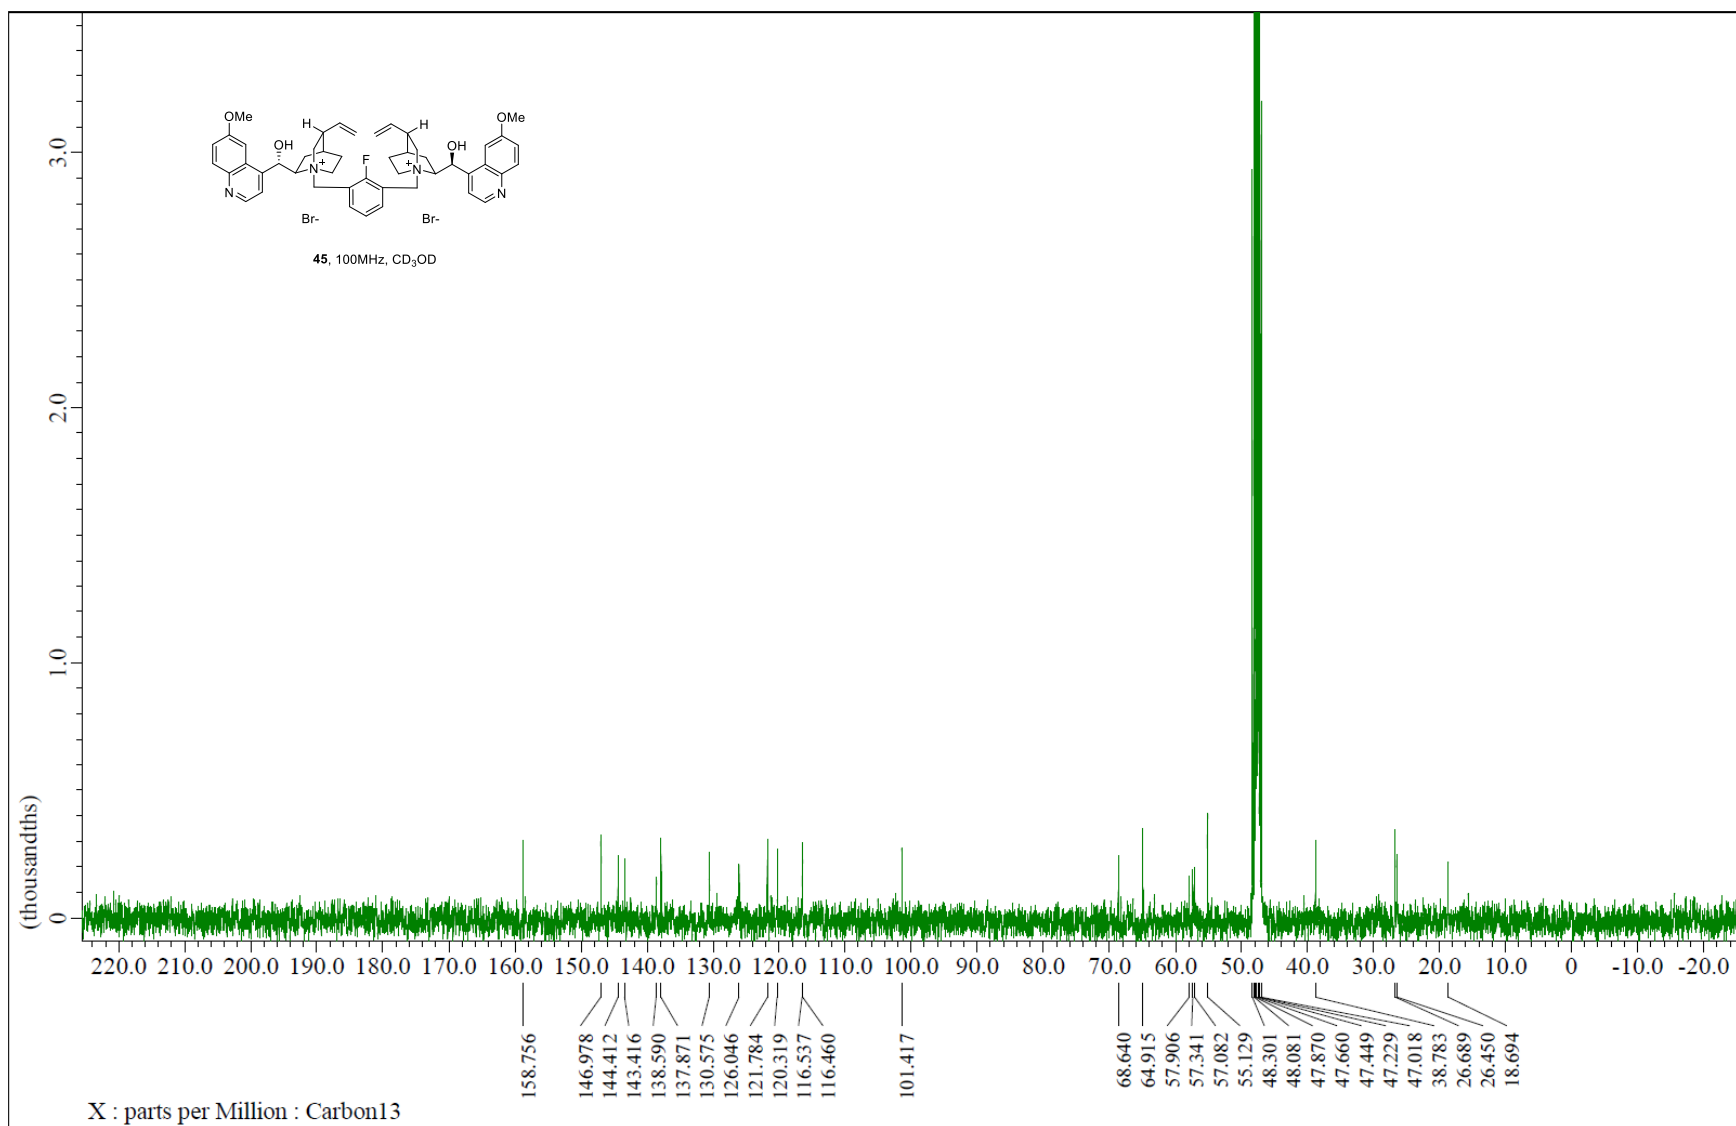



<sup>1</sup>H-NMR of compound **2a**

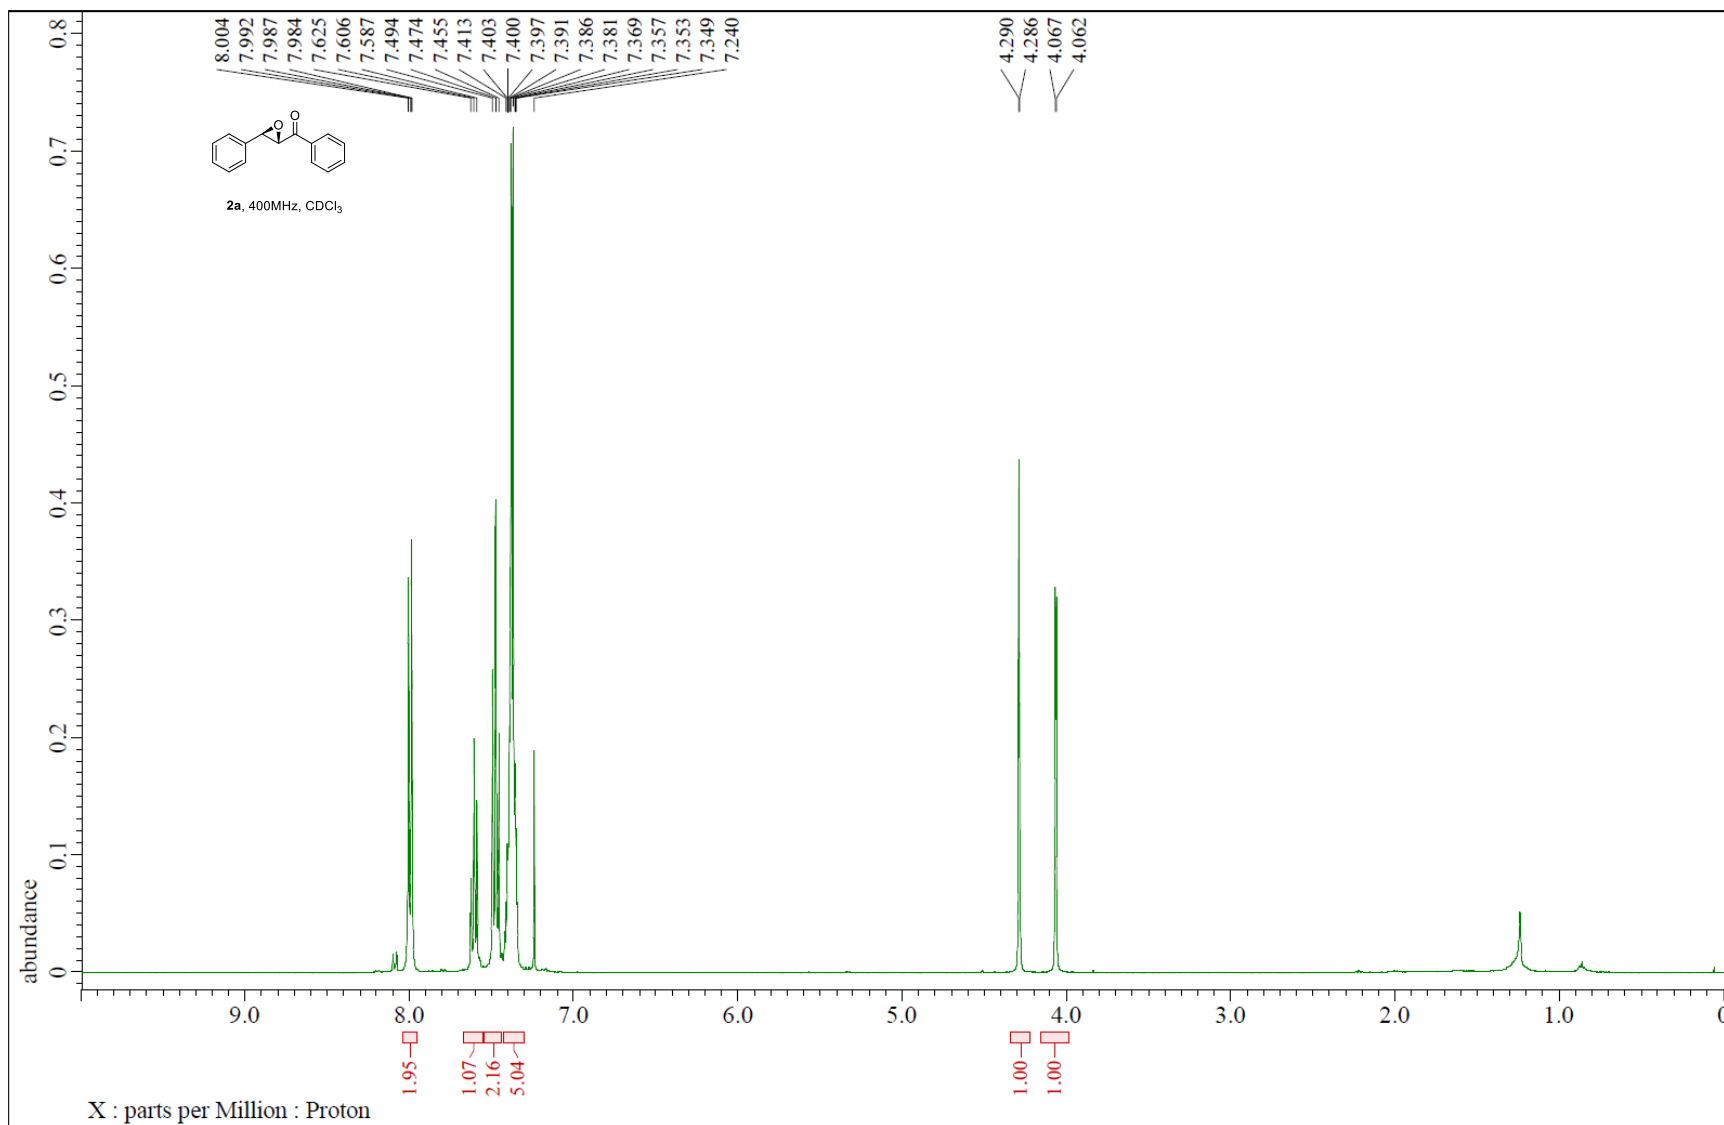

<sup>13</sup>C-NMR of compound **2a**

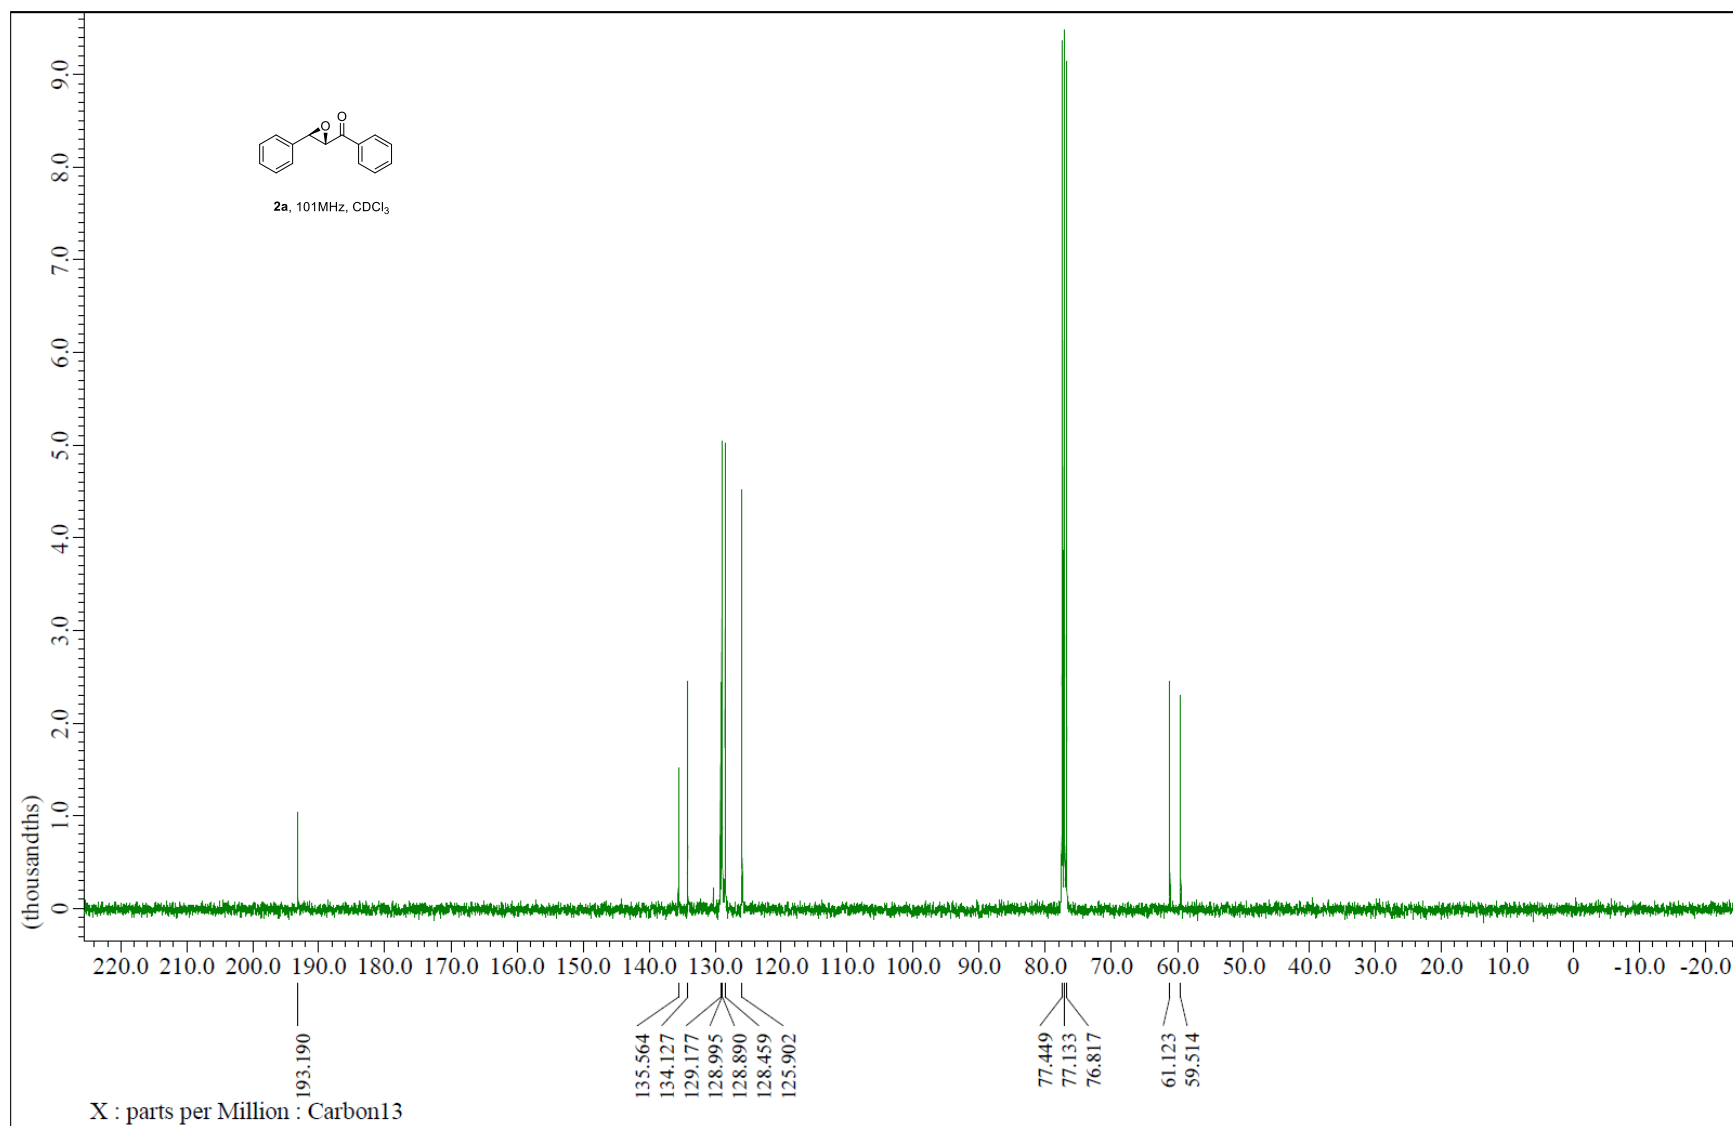

<sup>1</sup>H-NMR of compound **2b**

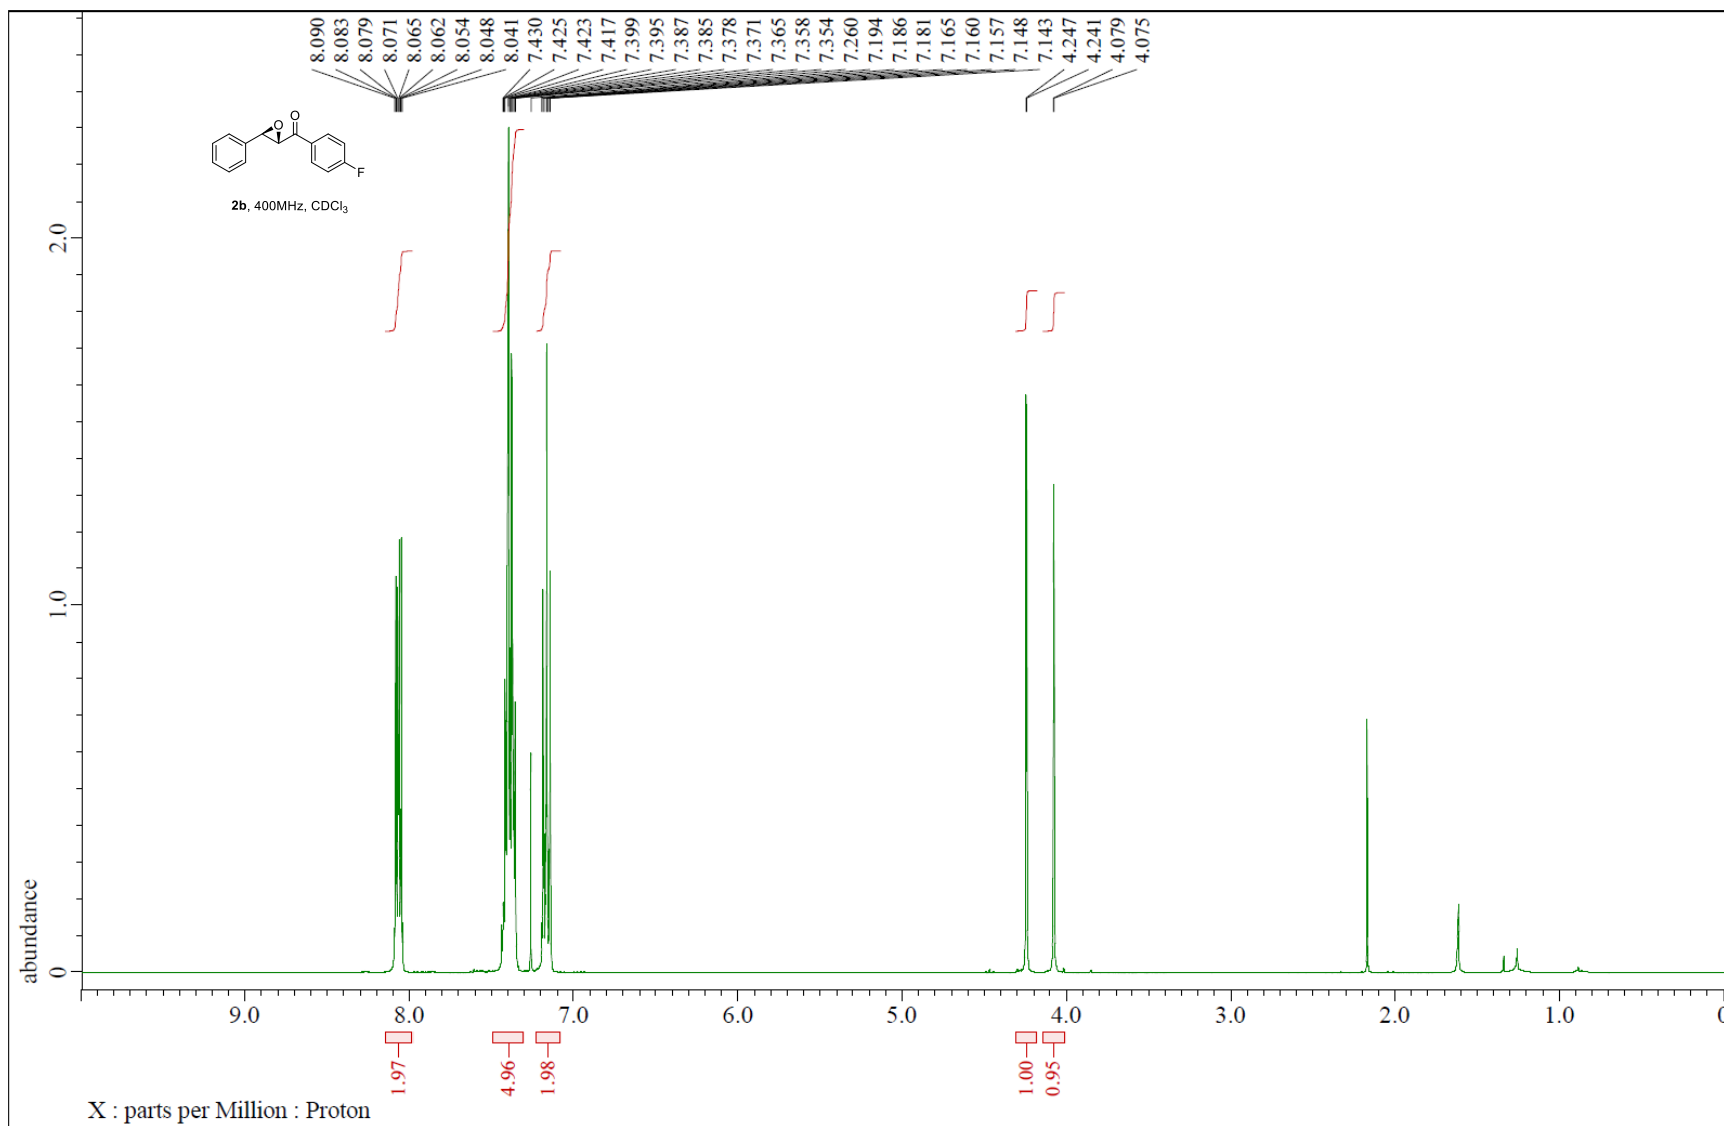

<sup>13</sup>C-NMR of compound **2b**

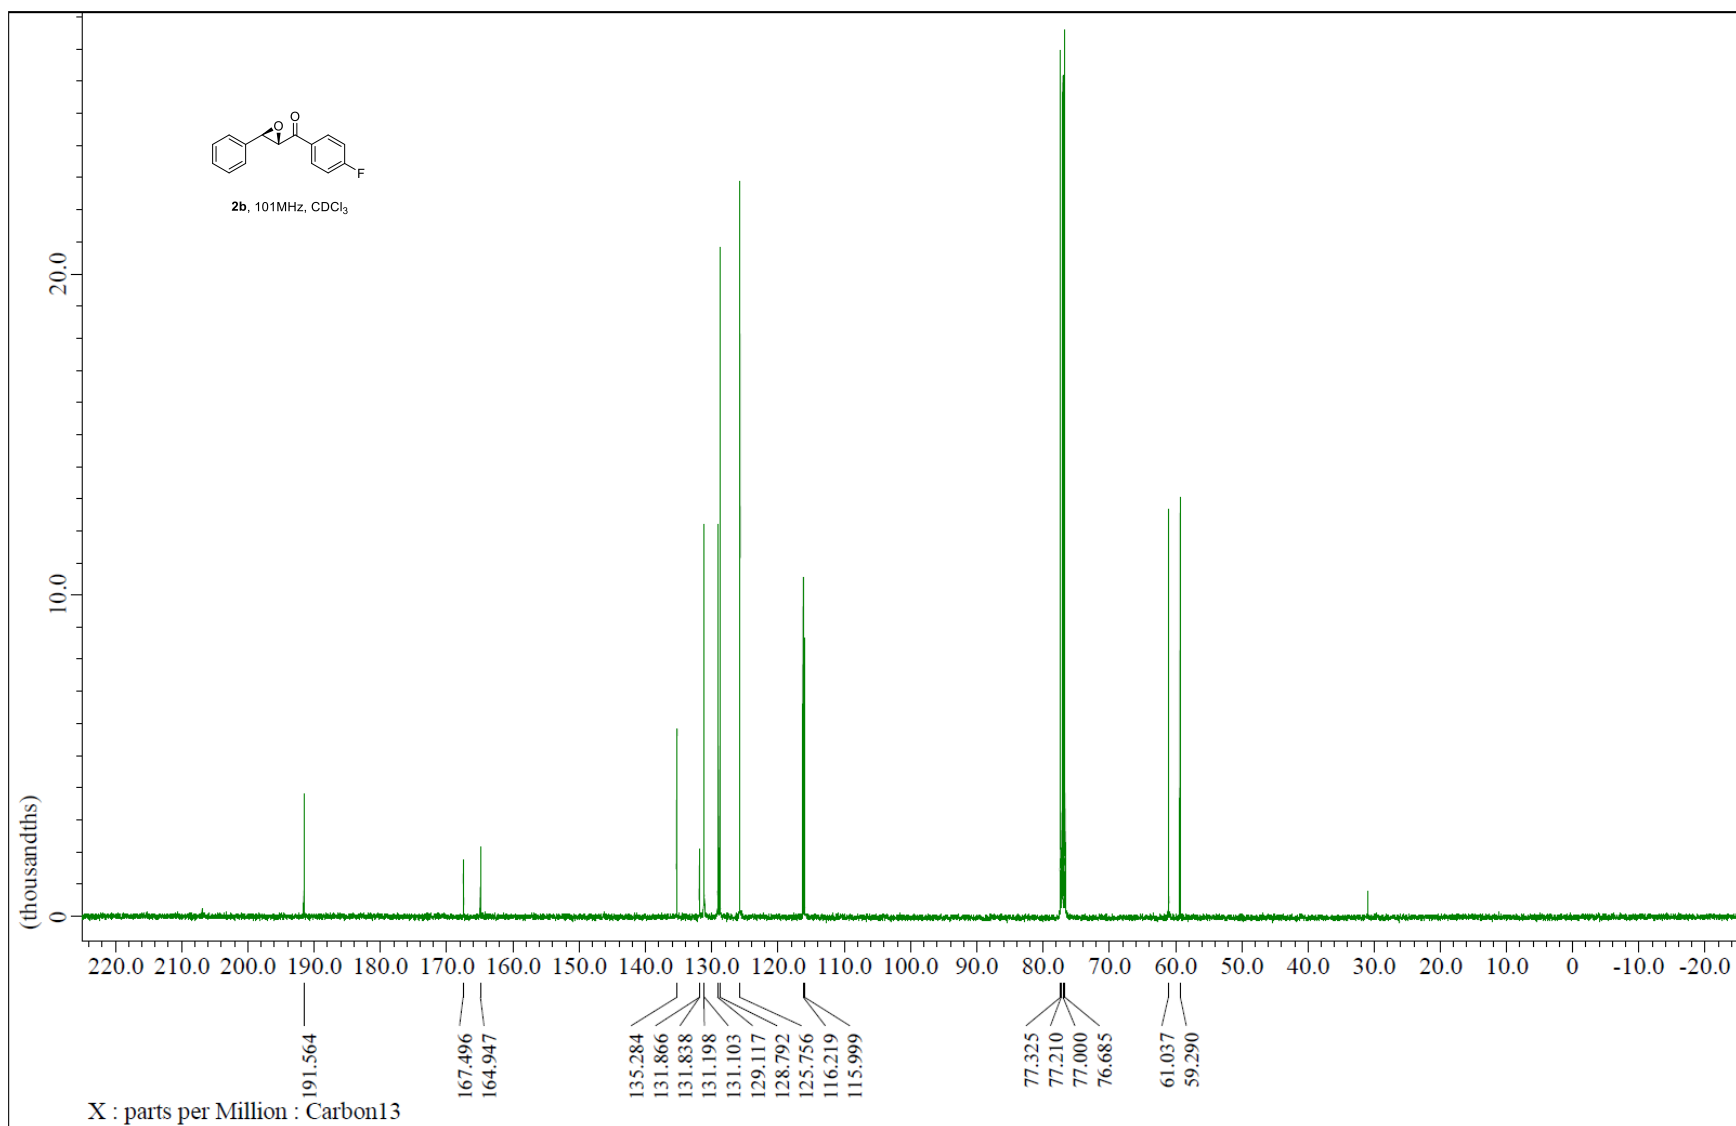

<sup>1</sup>H-NMR of compound **2c**

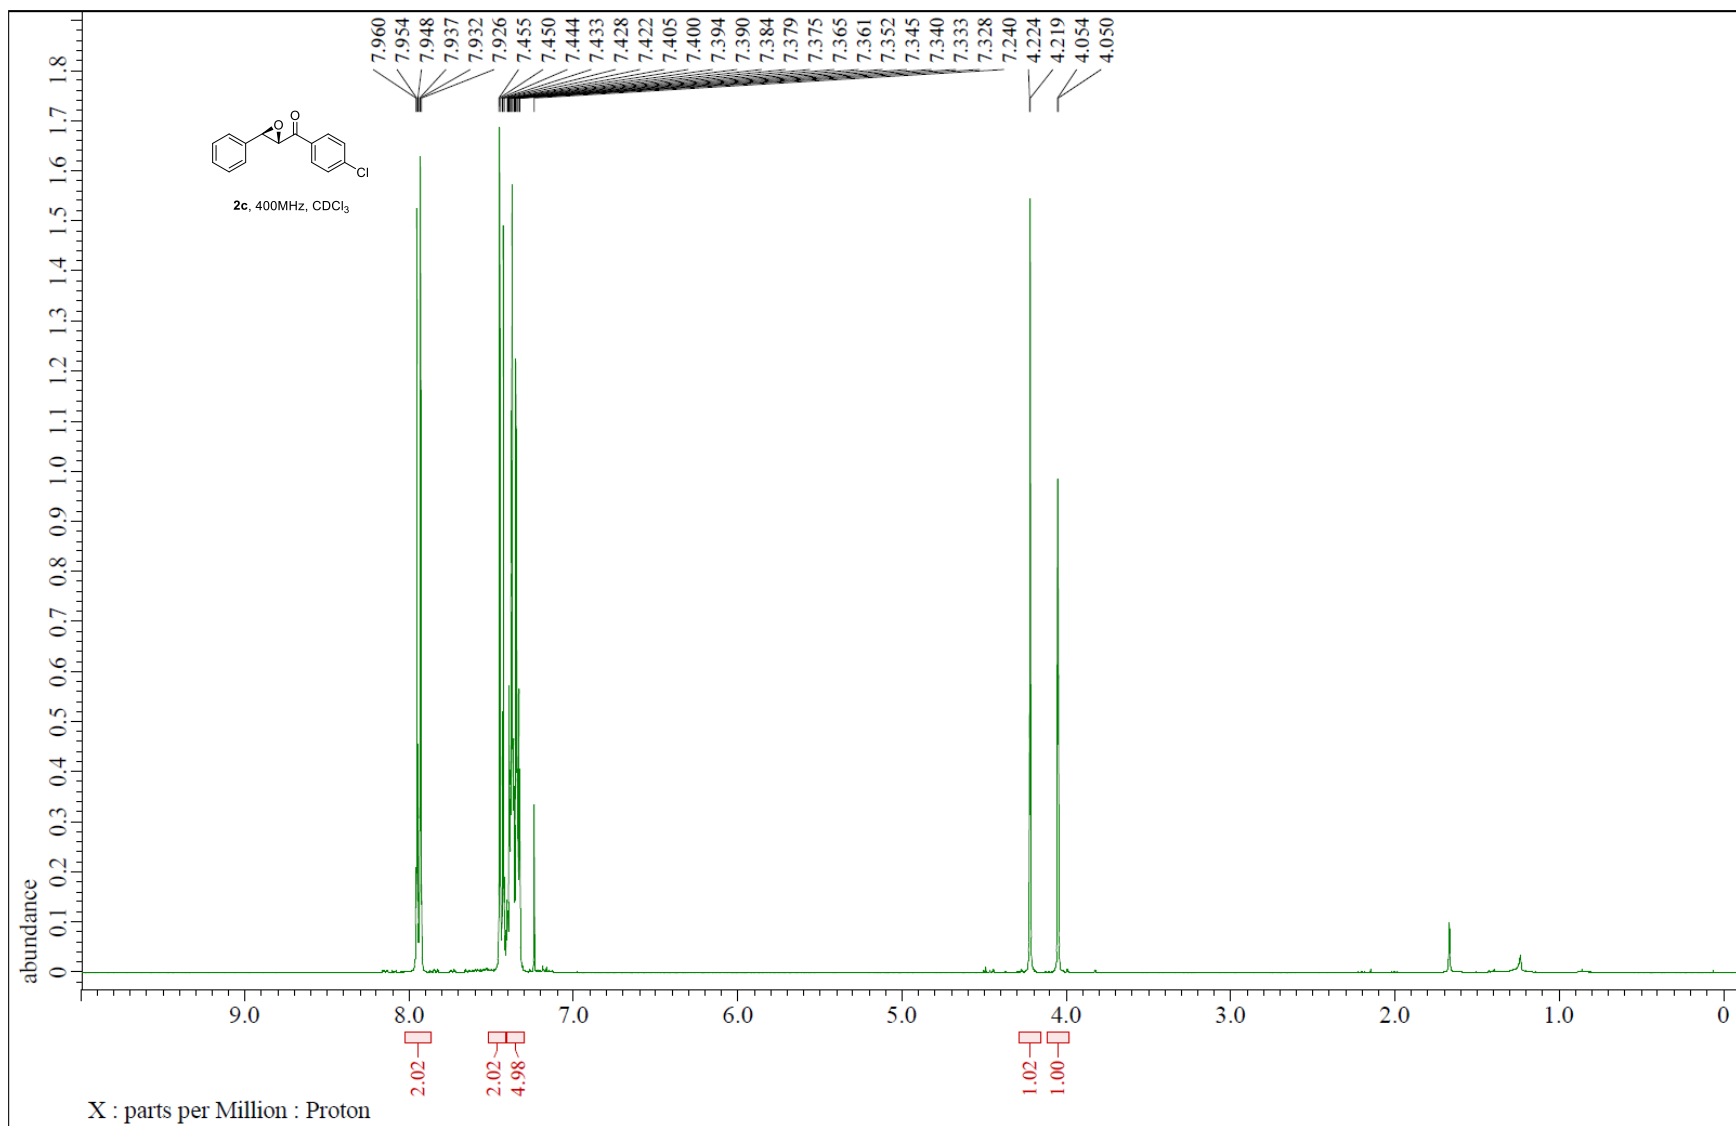

<sup>13</sup>C-NMR of compound **2c**

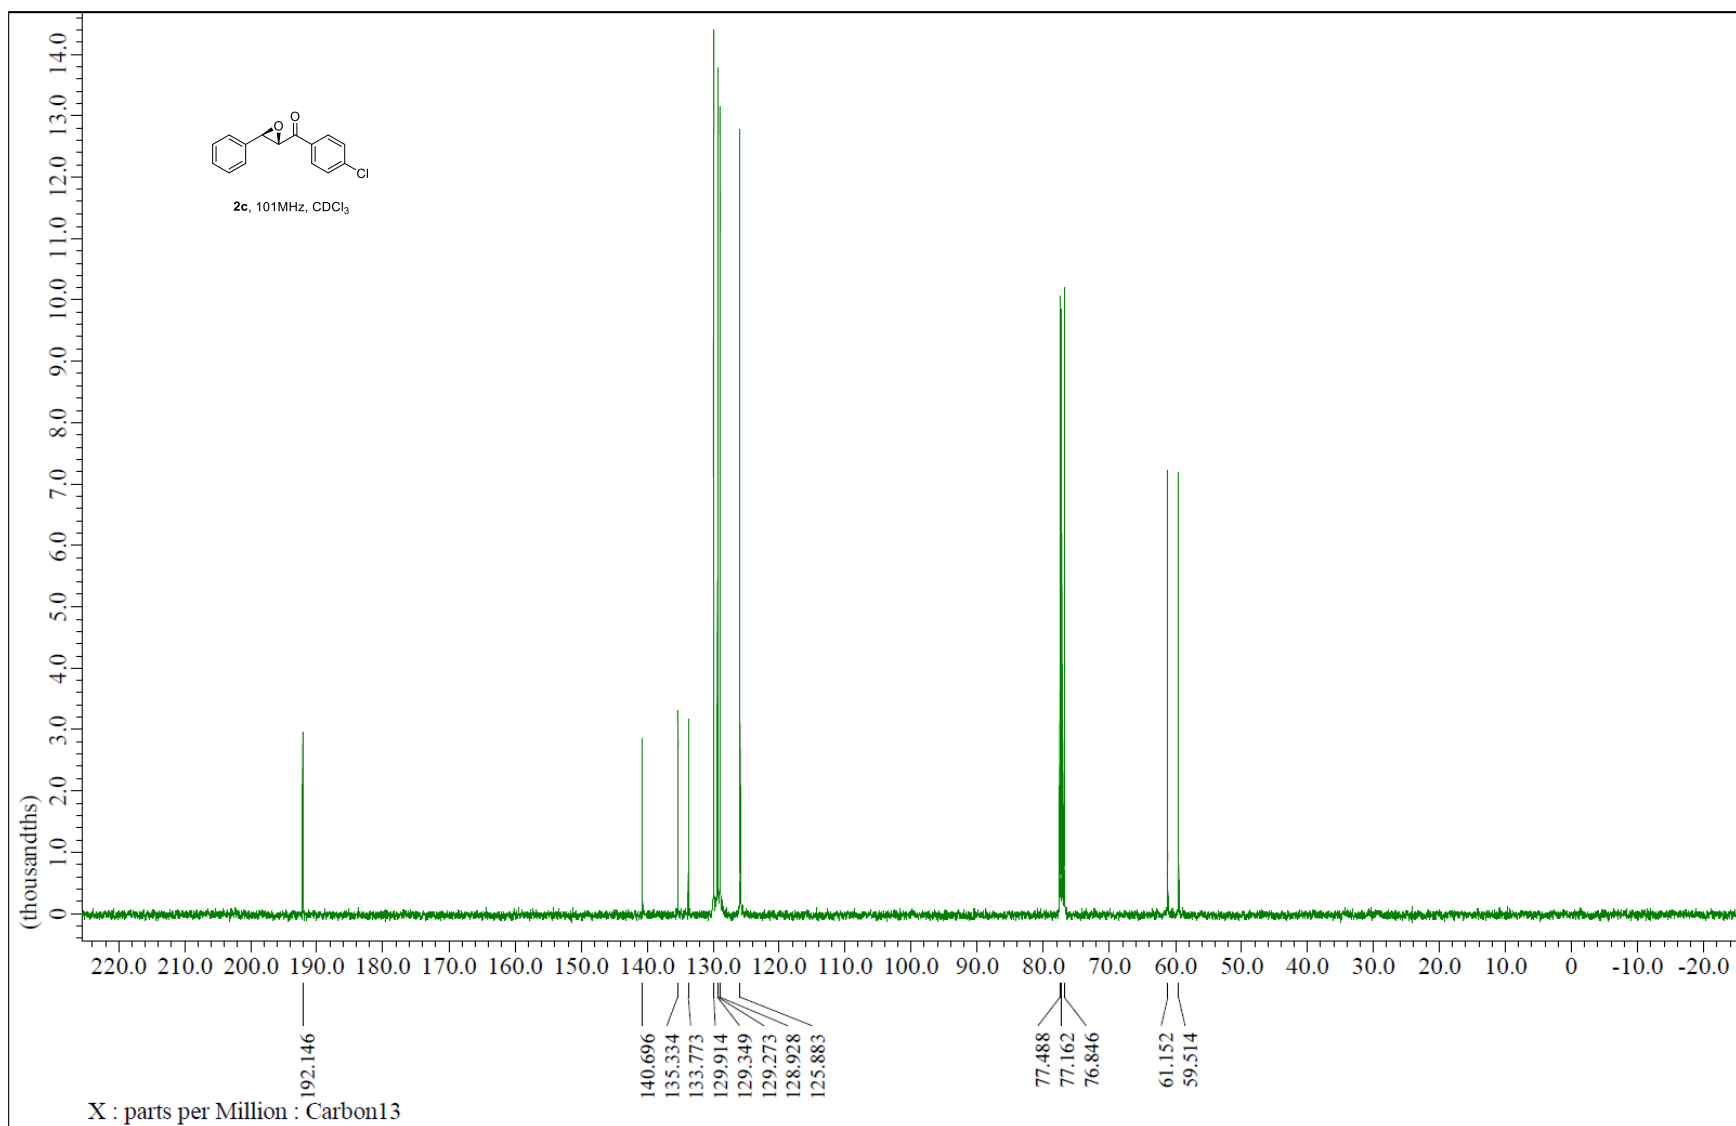

<sup>1</sup>H-NMR of compound **2d**

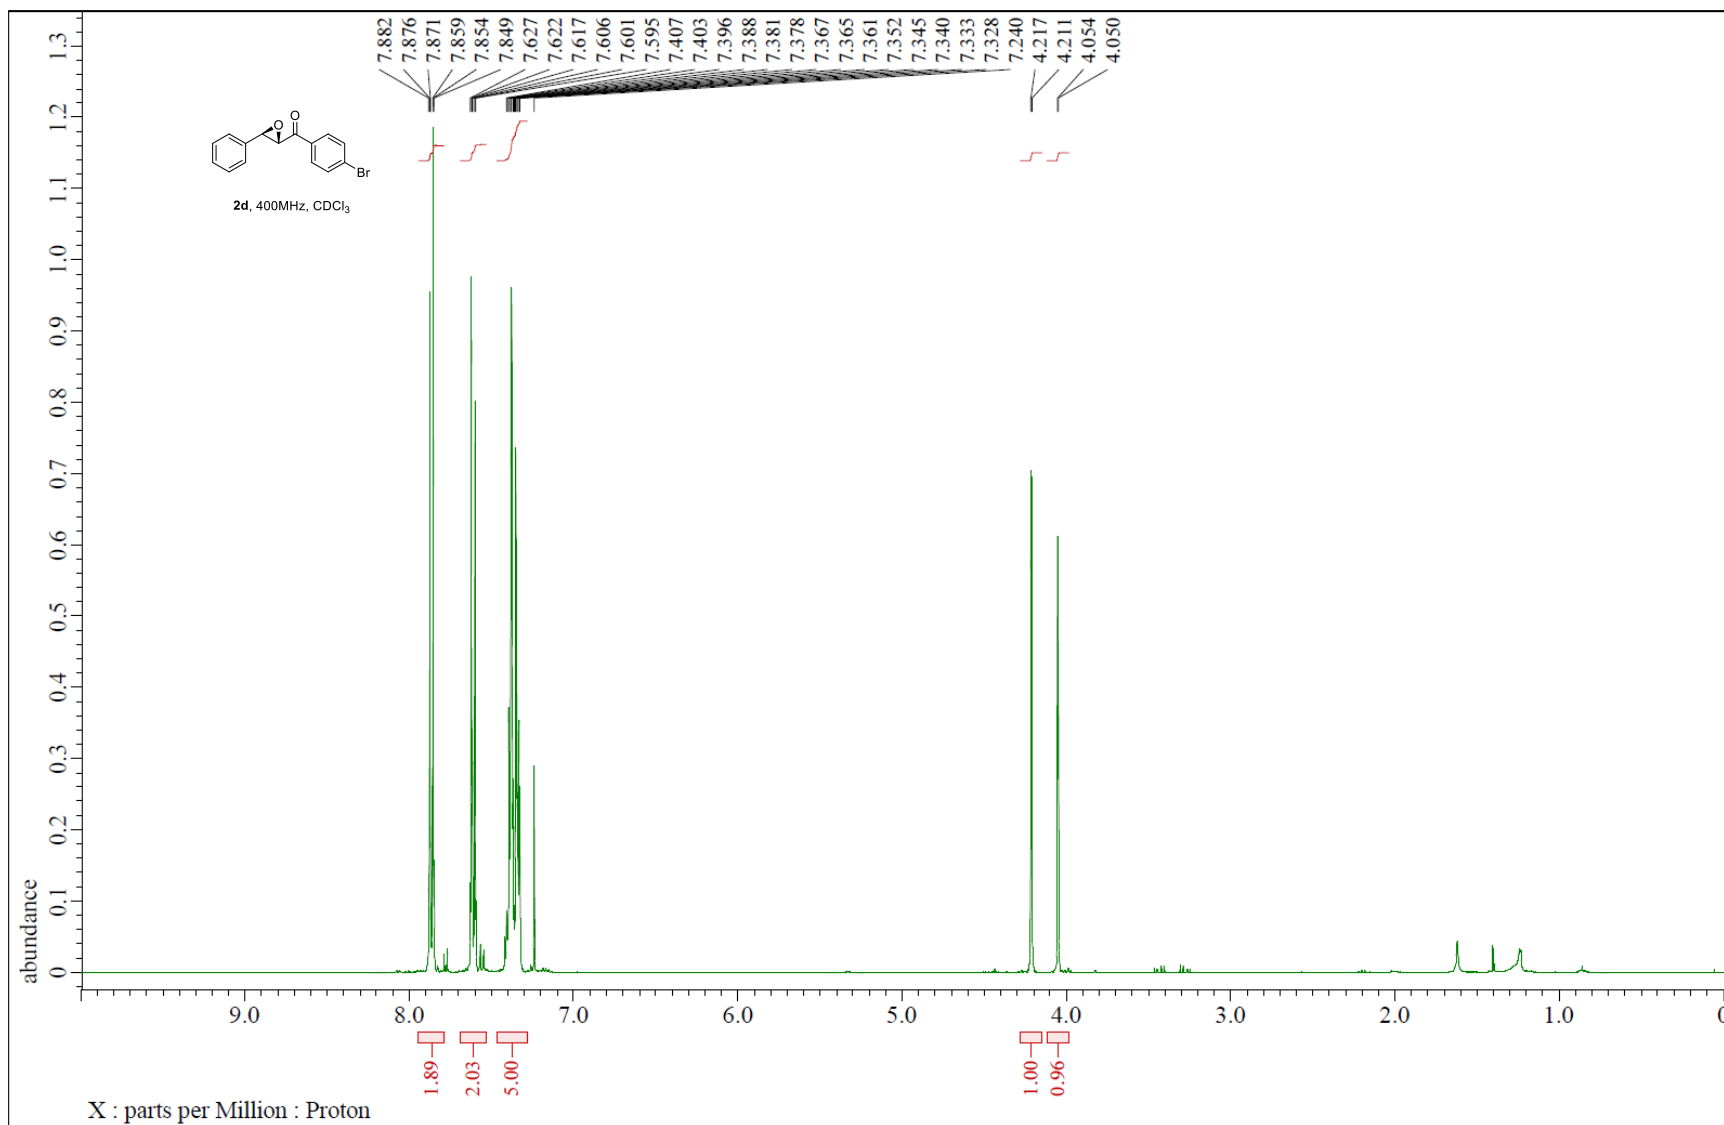

<sup>13</sup>C-NMR of compound **2d**

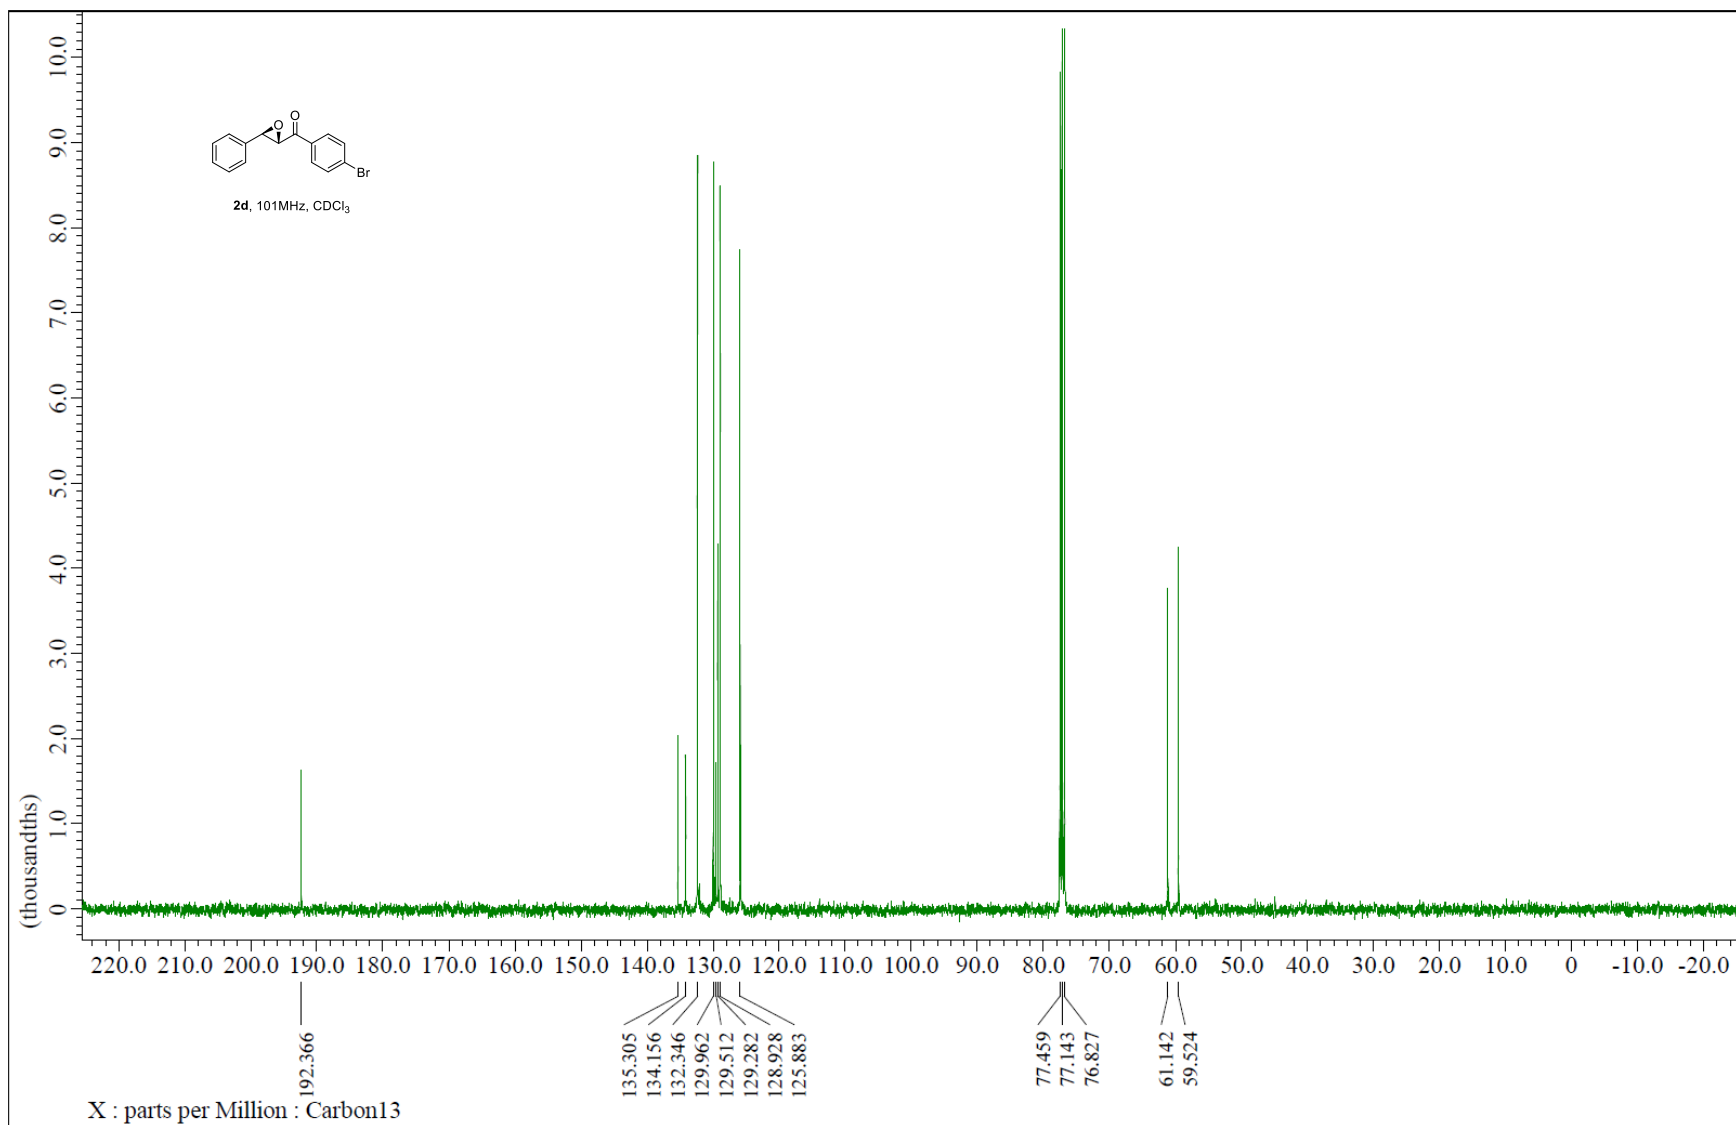



<sup>1</sup>H-NMR of compound **2e**

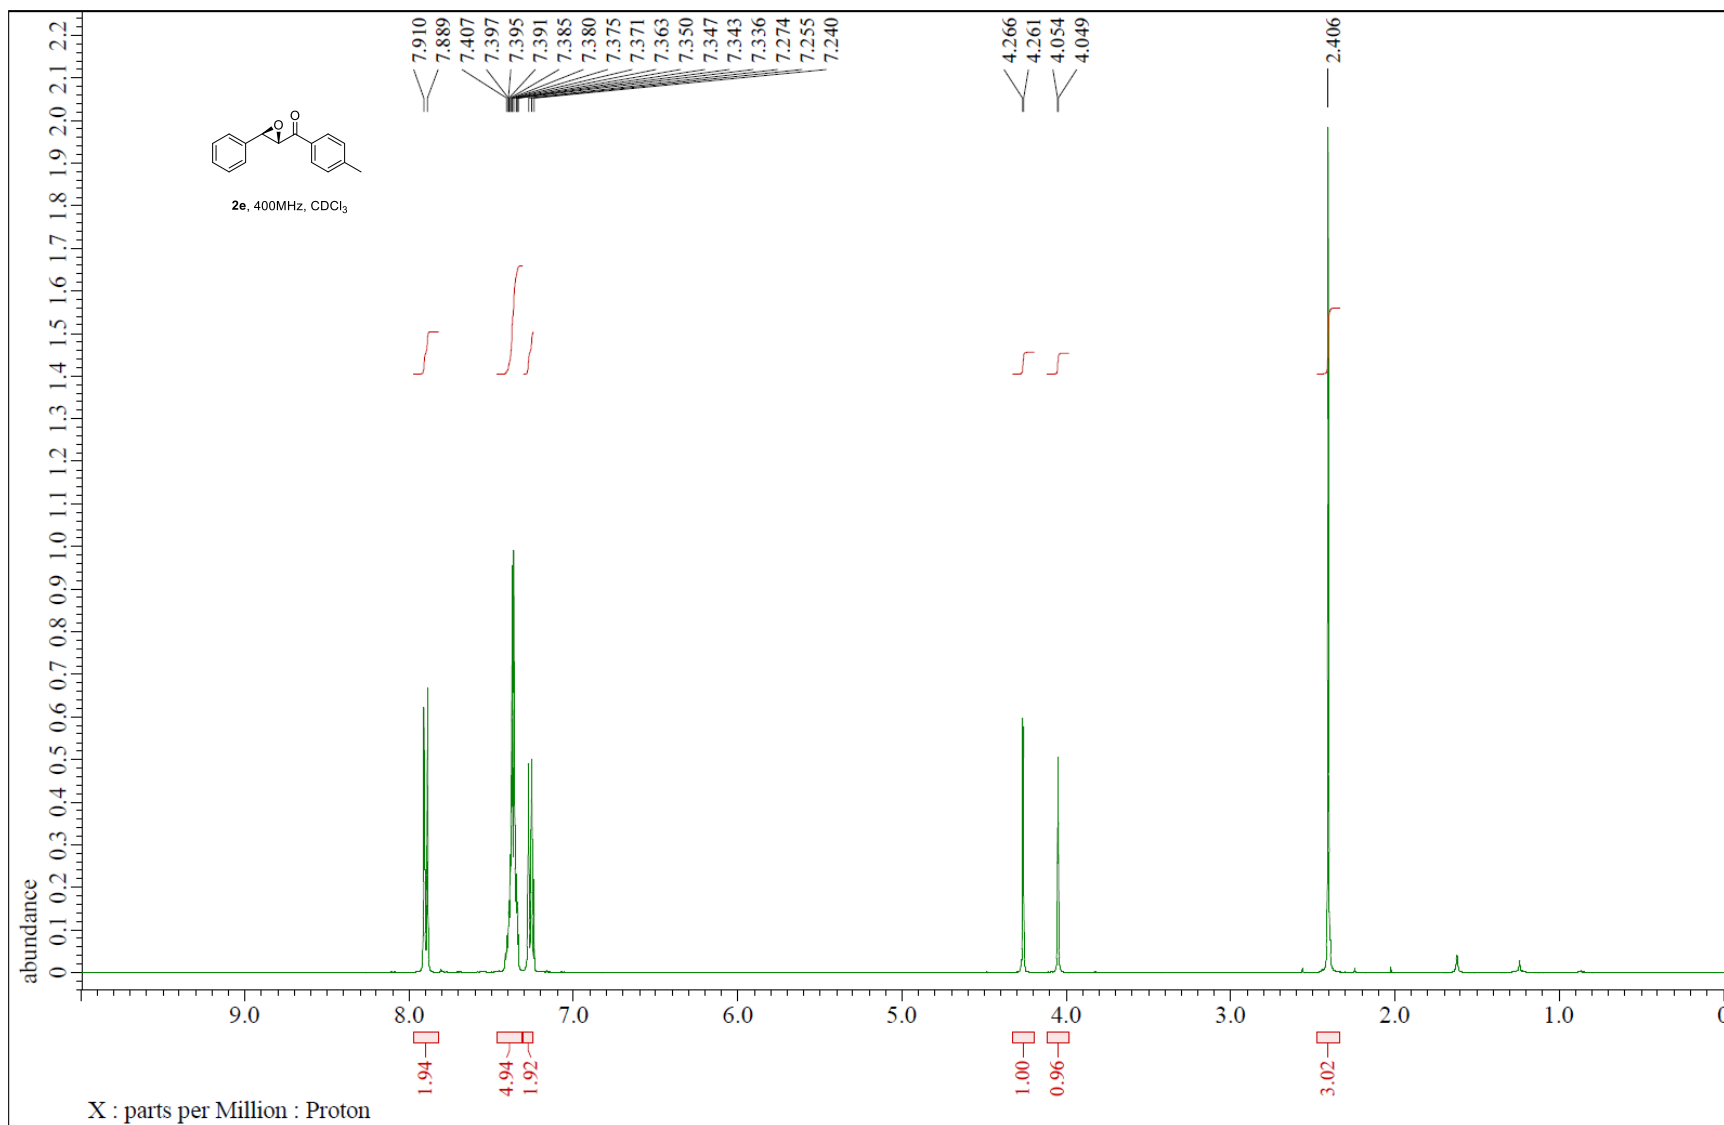

<sup>13</sup>C-NMR of compound **2e**

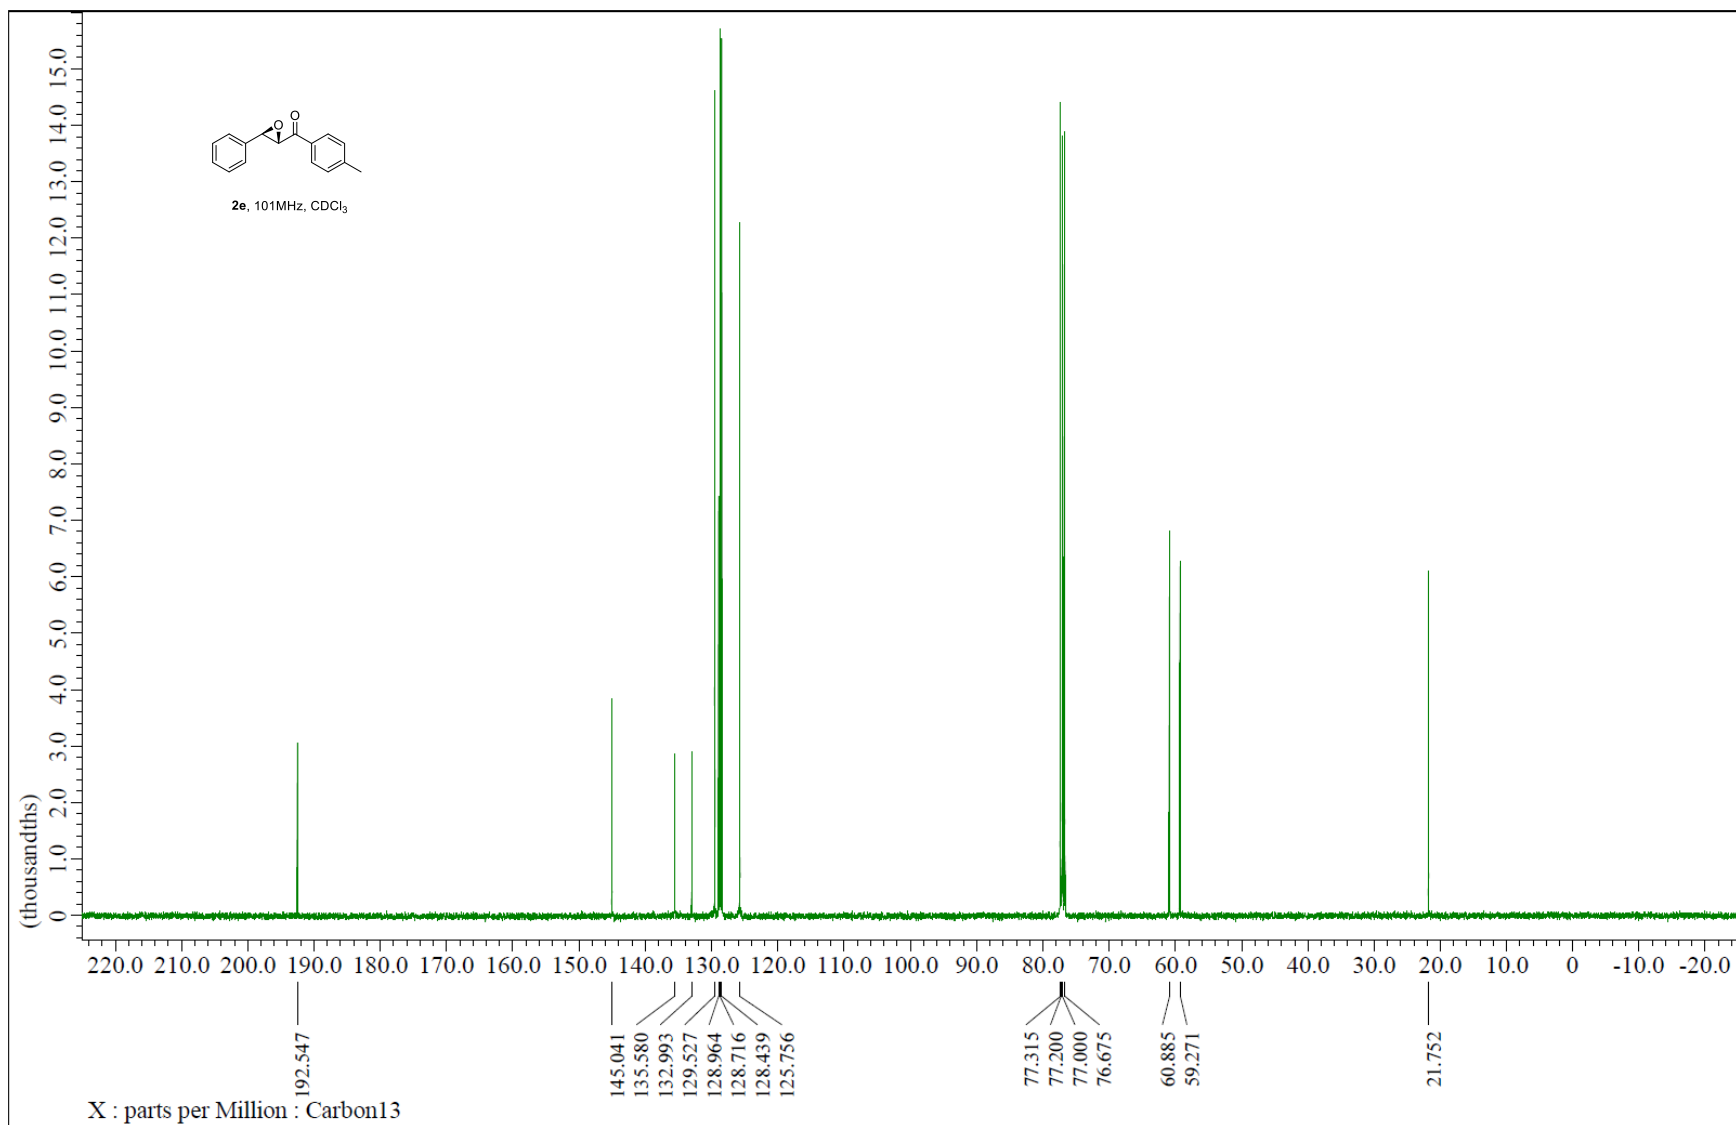

<sup>1</sup>H-NMR of compound **2f**

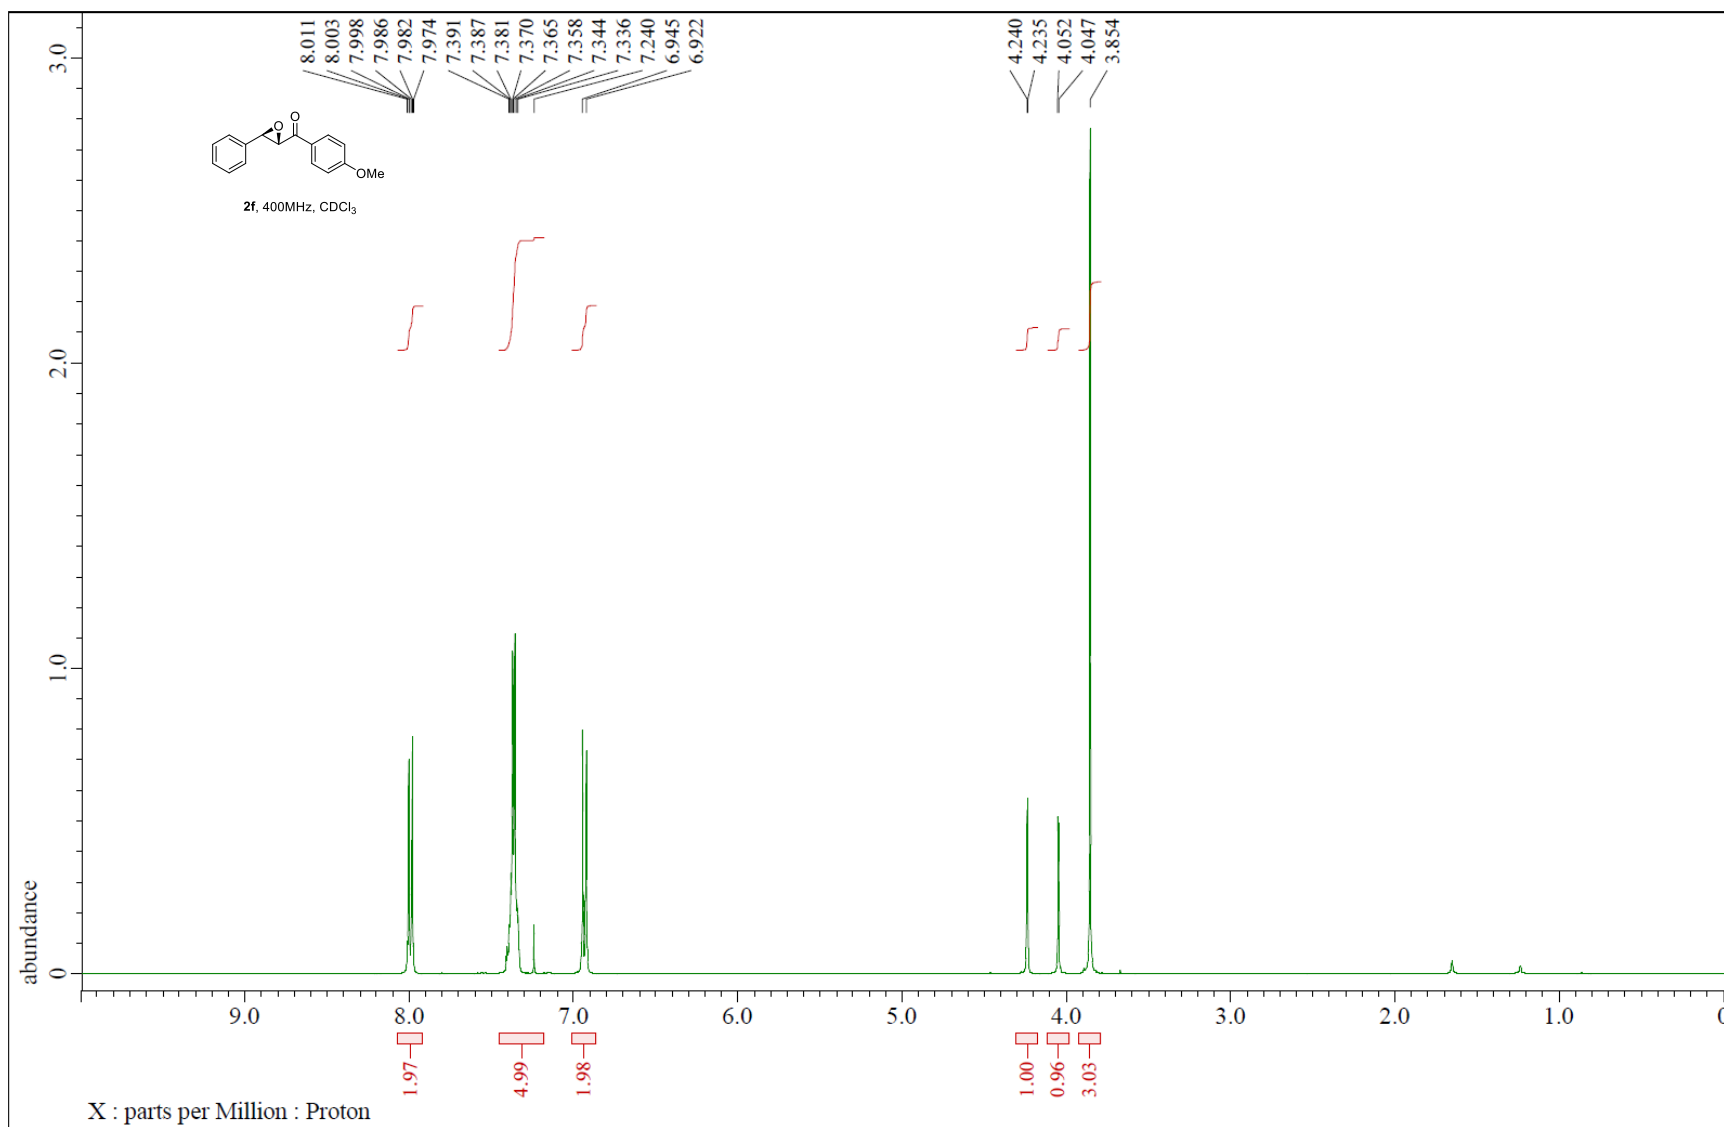

<sup>13</sup>C-NMR of compound **2f**

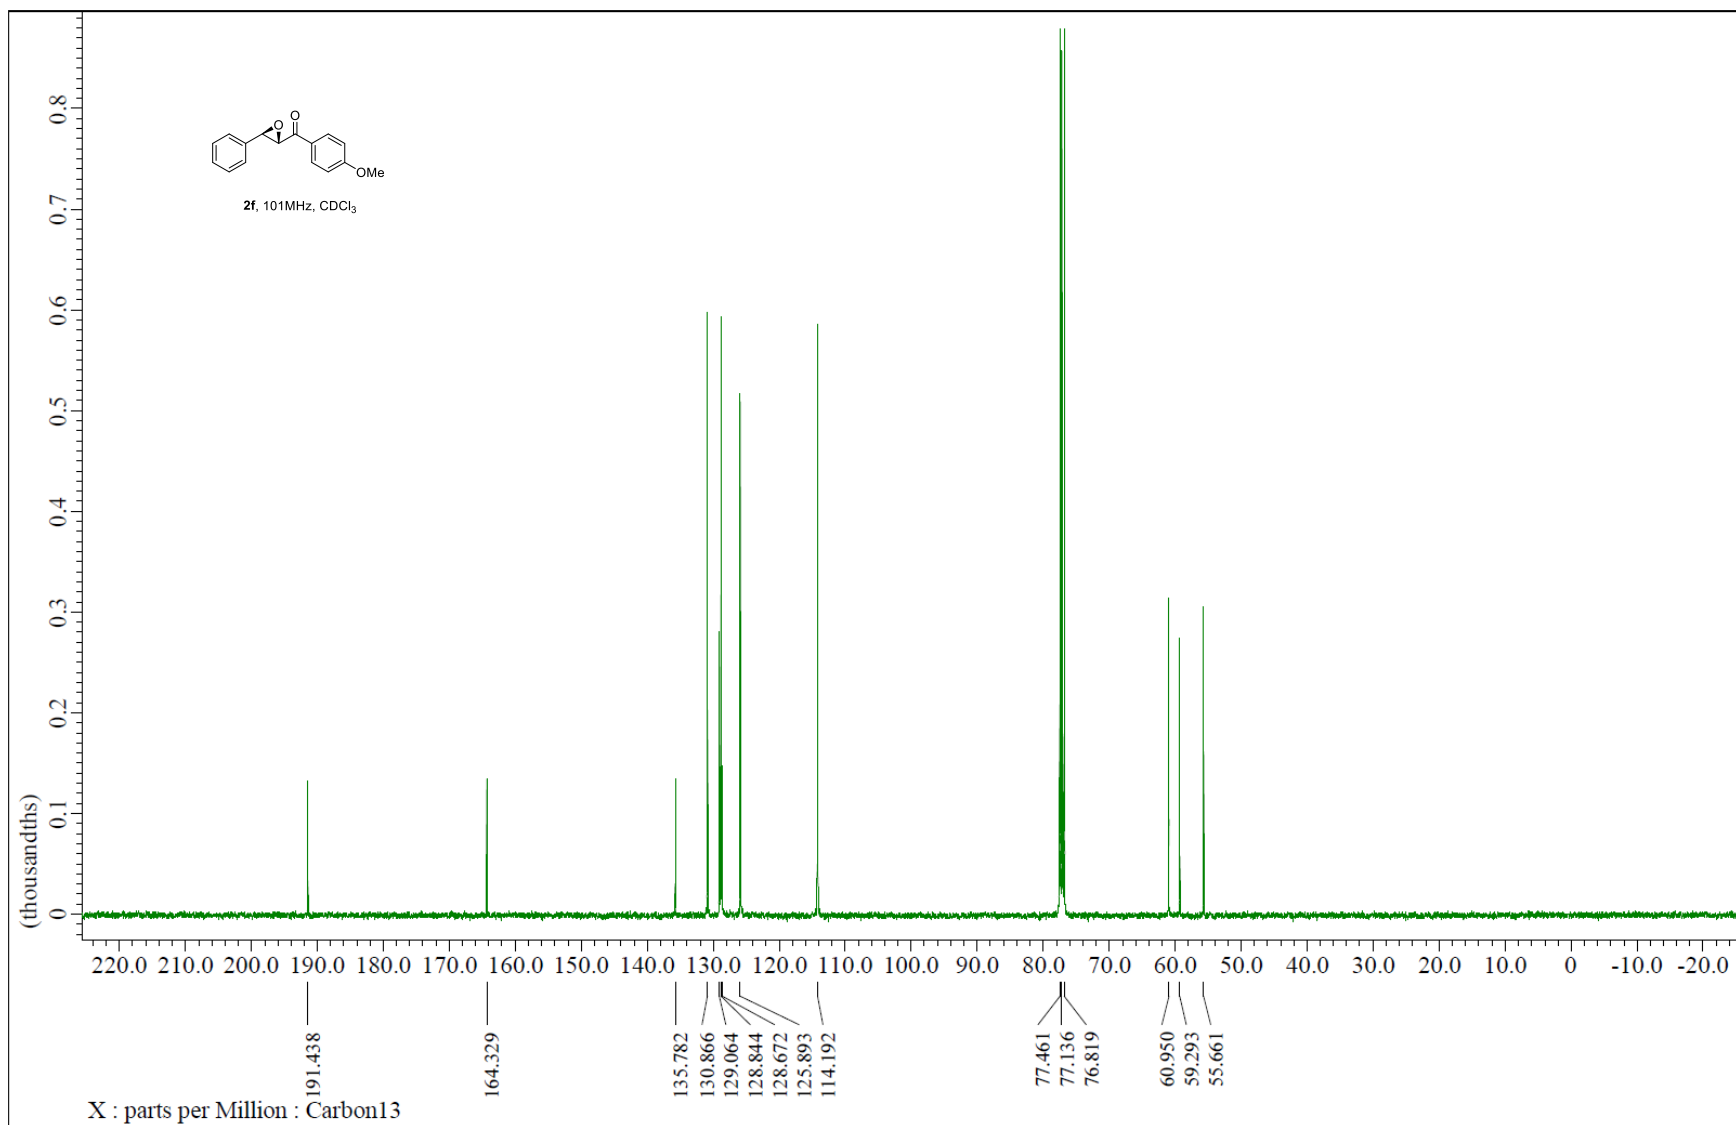

<sup>1</sup>H-NMR of compound **2g**

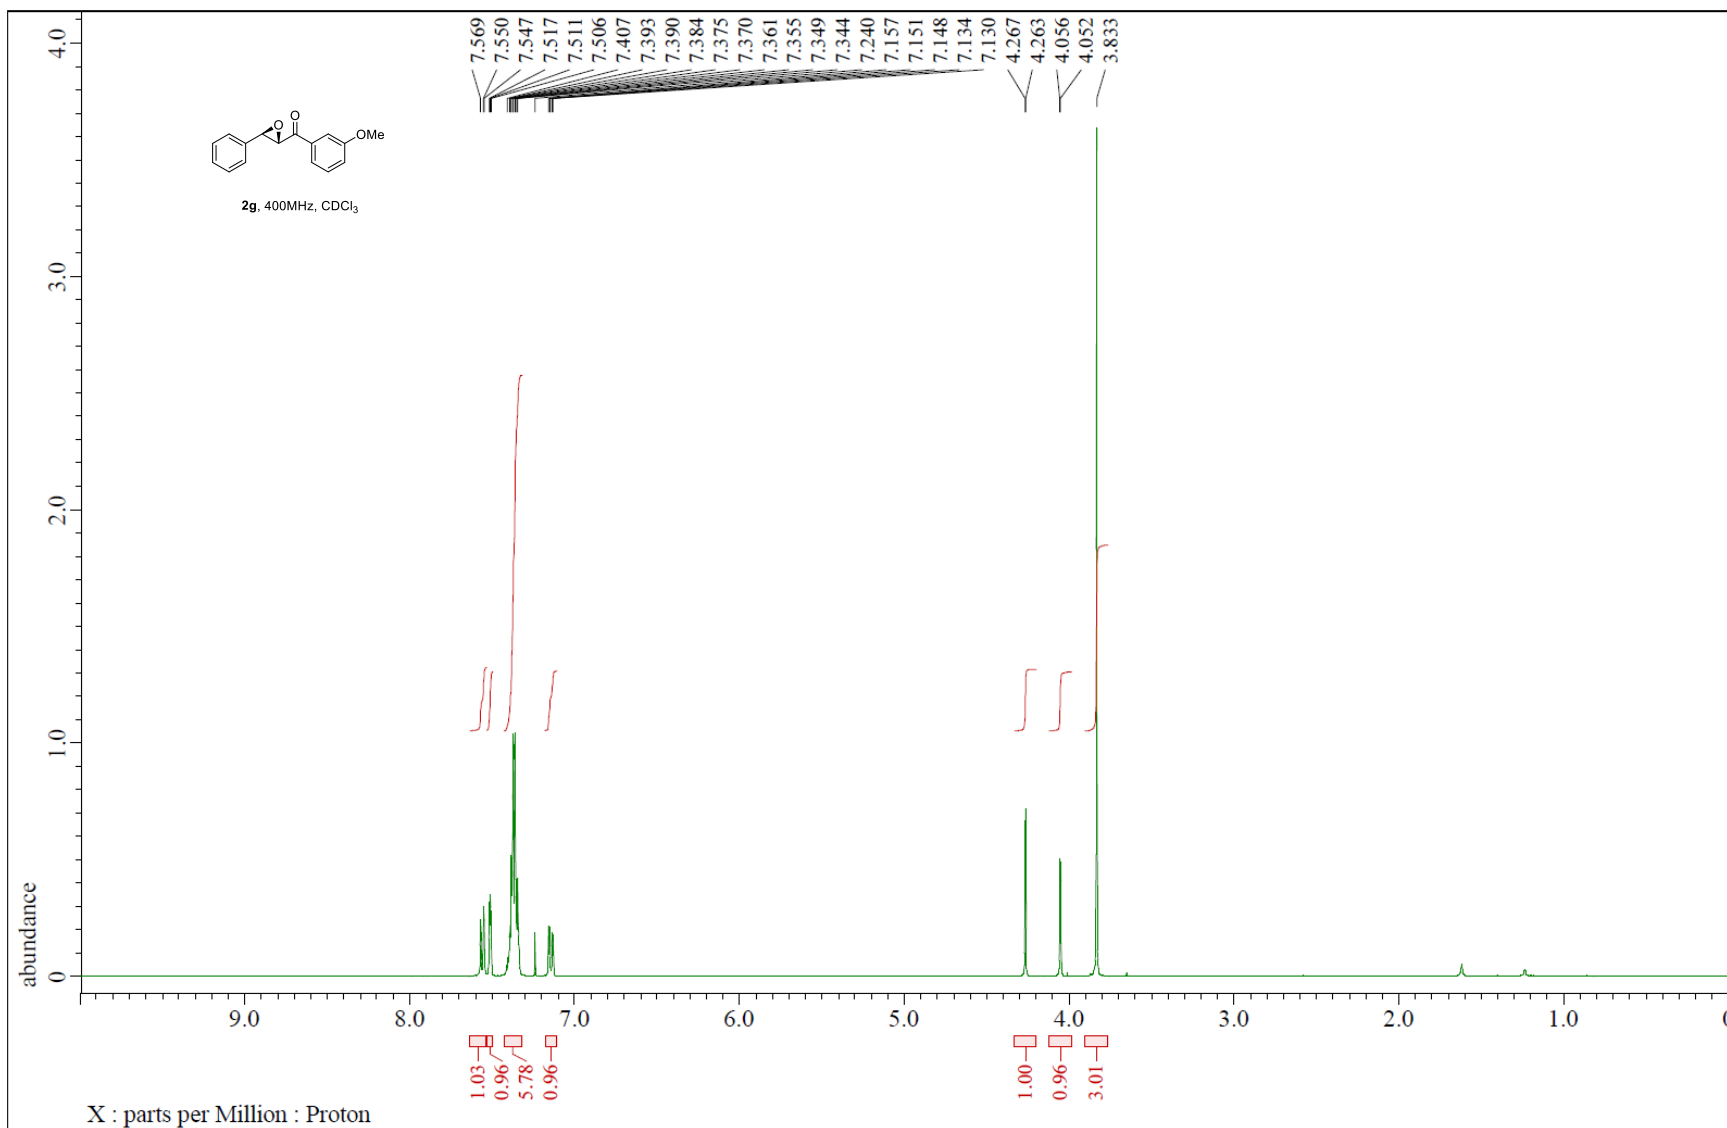

<sup>1</sup>H-NMR of compound **2g**

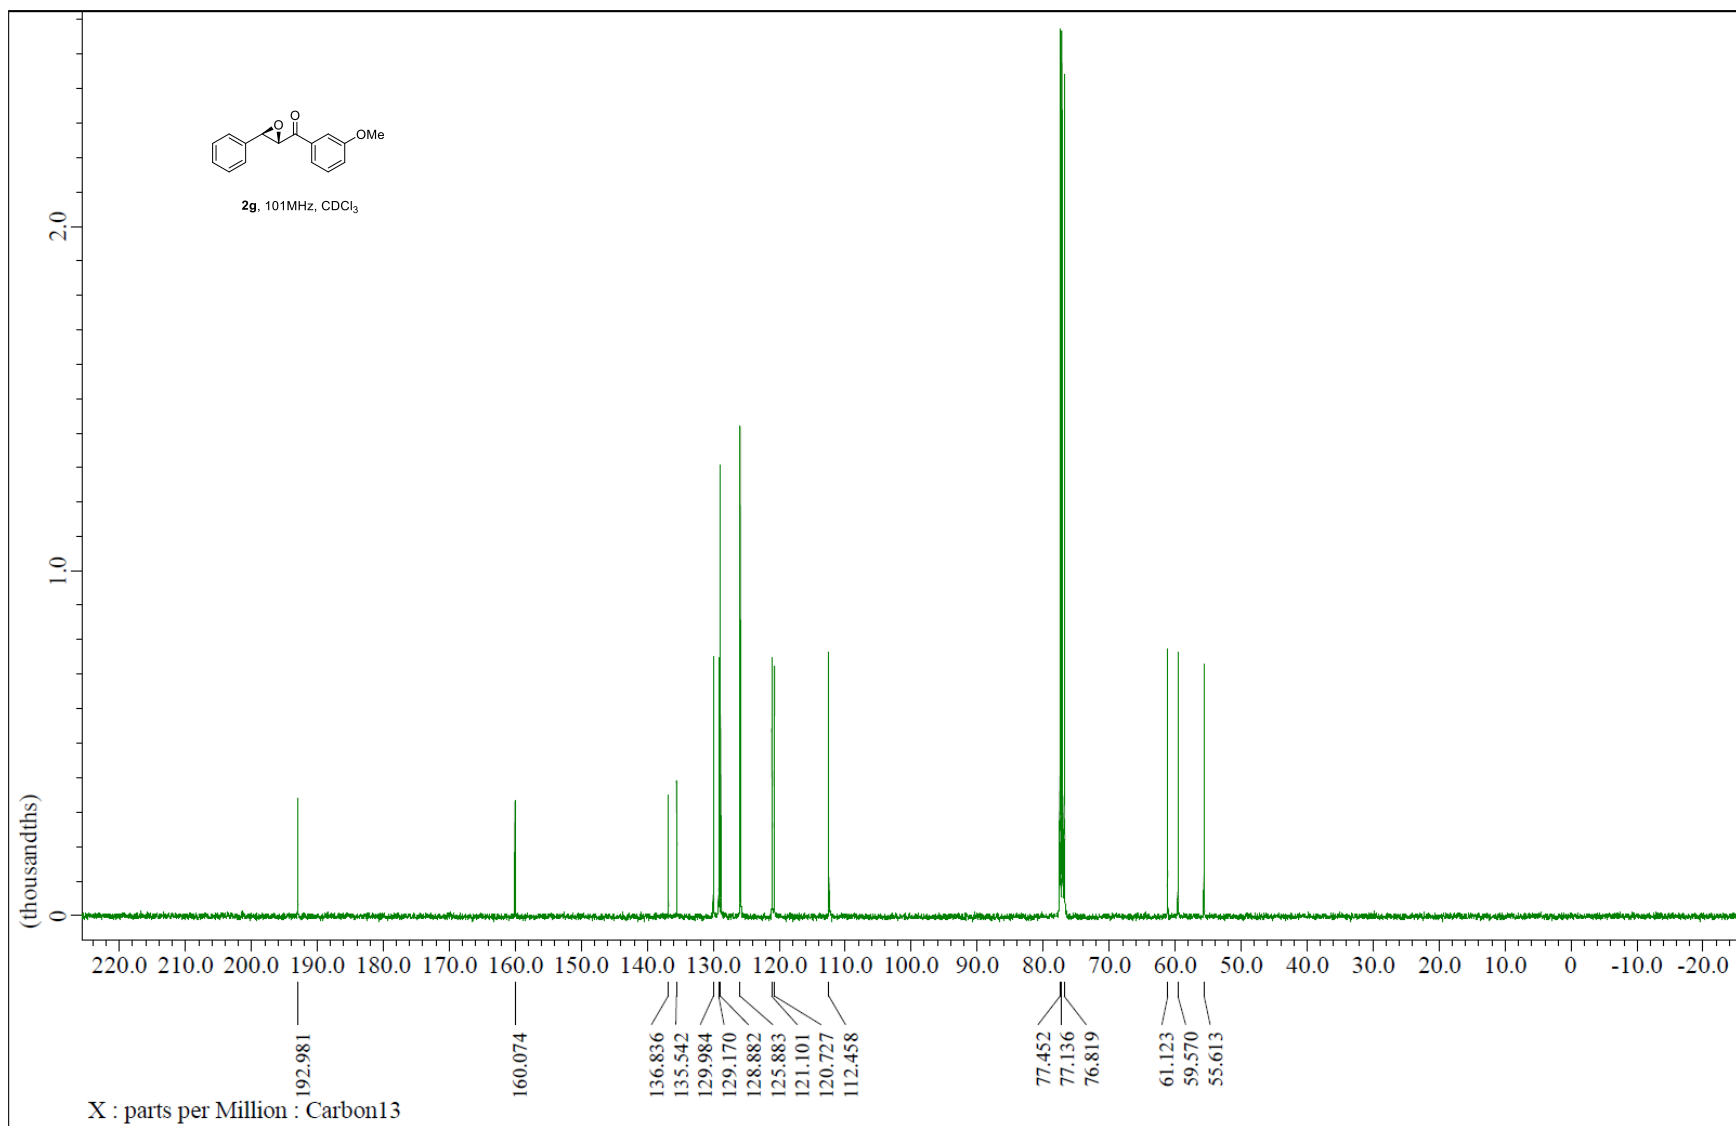

<sup>1</sup>H-NMR of compound **2h**

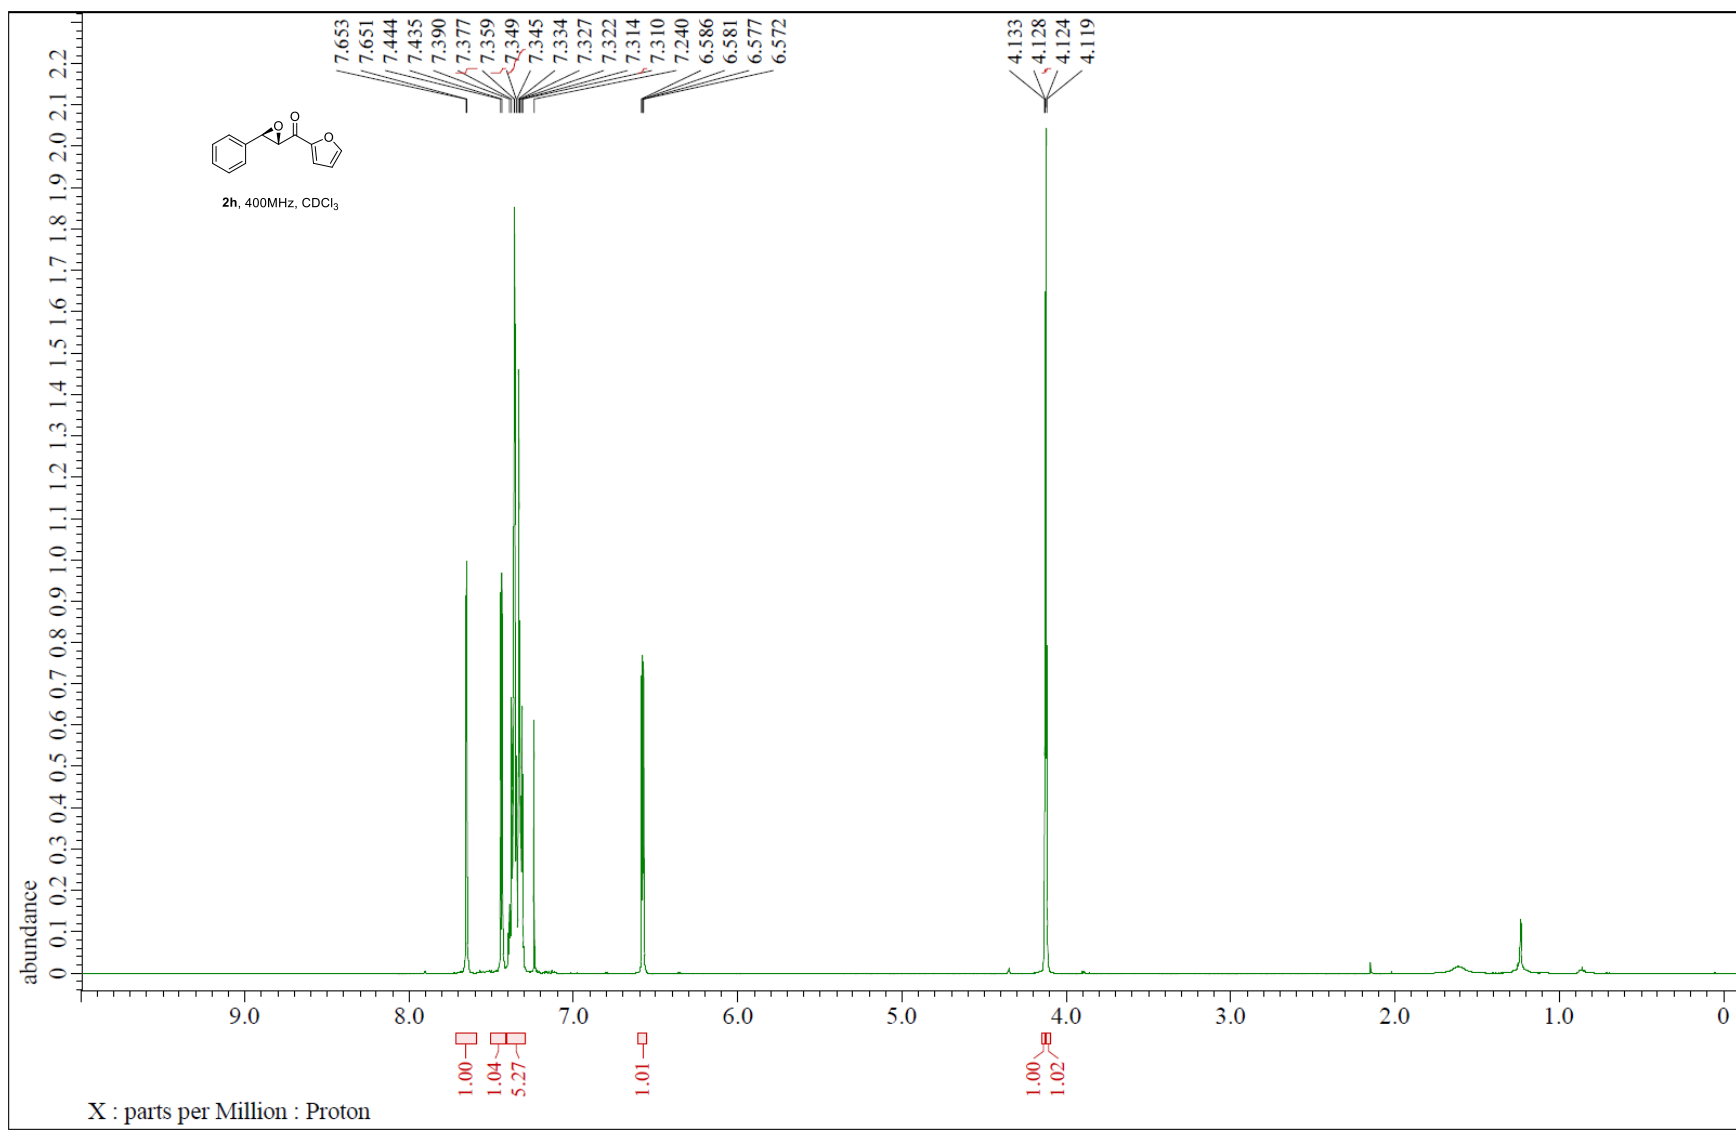

<sup>13</sup>C-NMR of compound **2h**

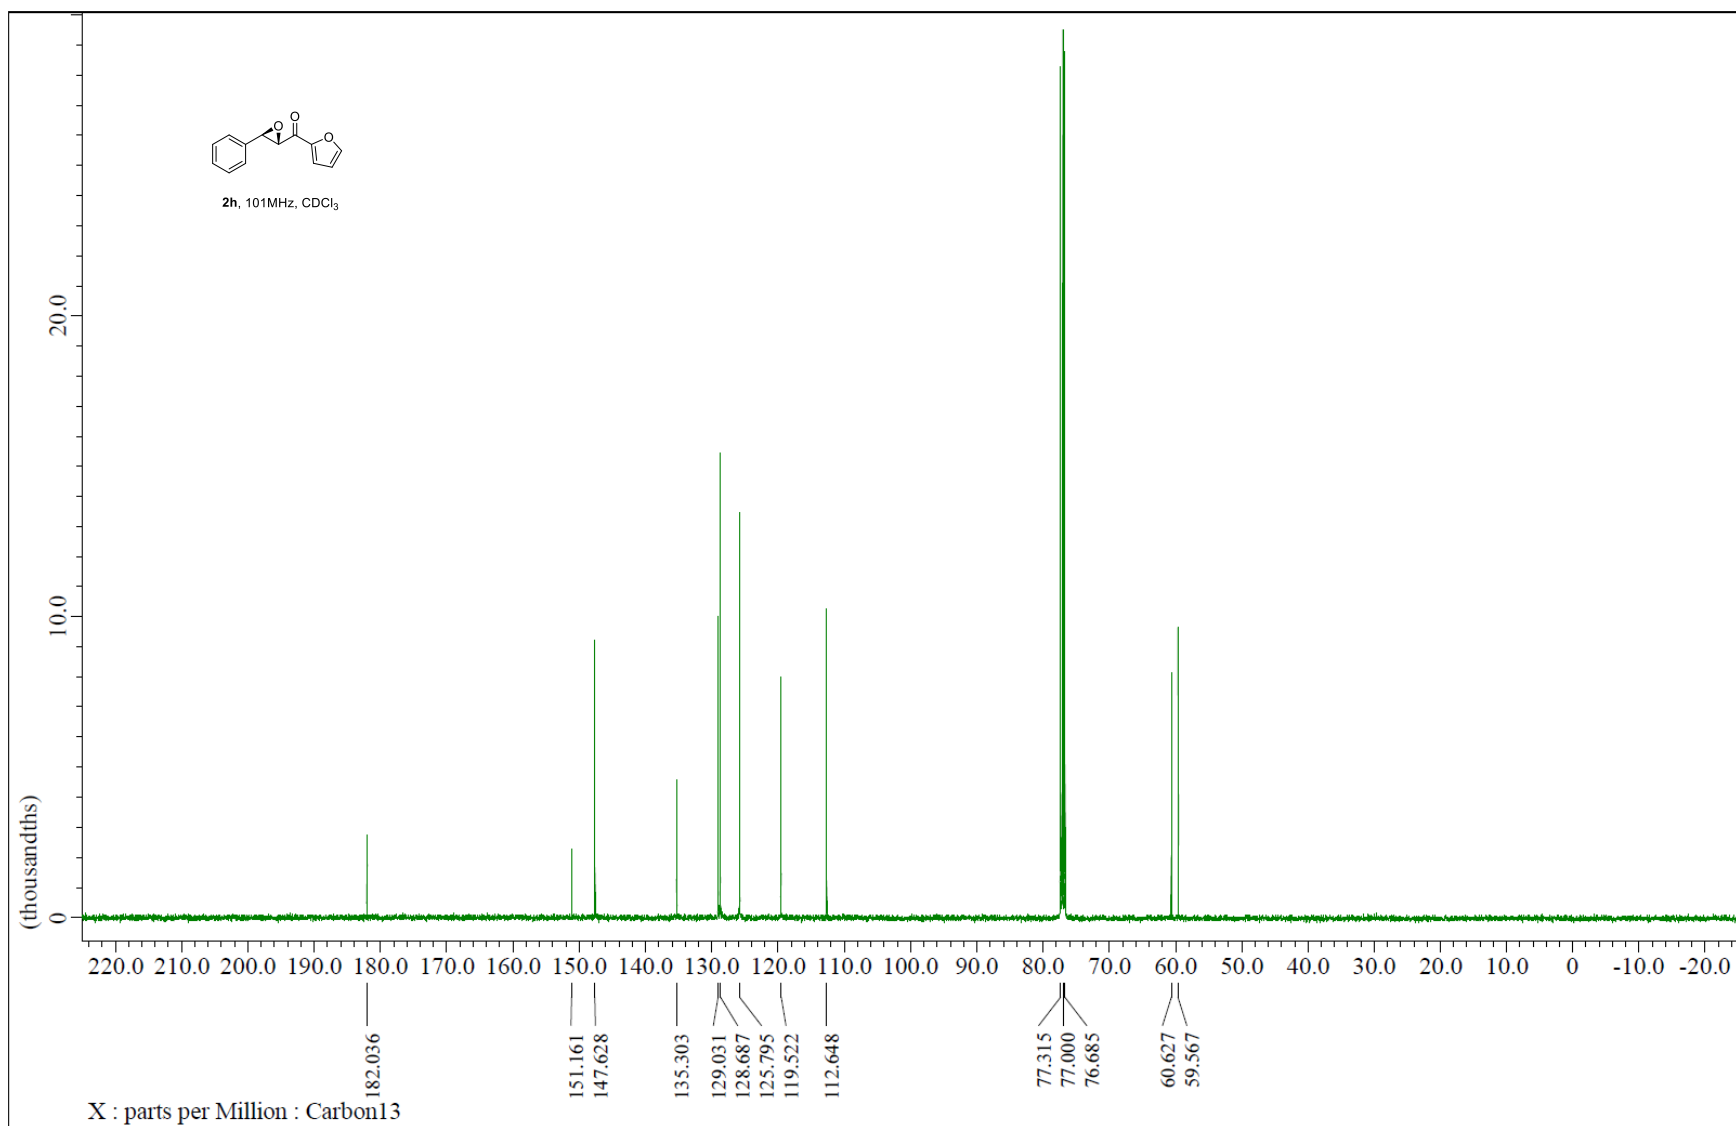



<sup>1</sup>H-NMR of compound **2i**

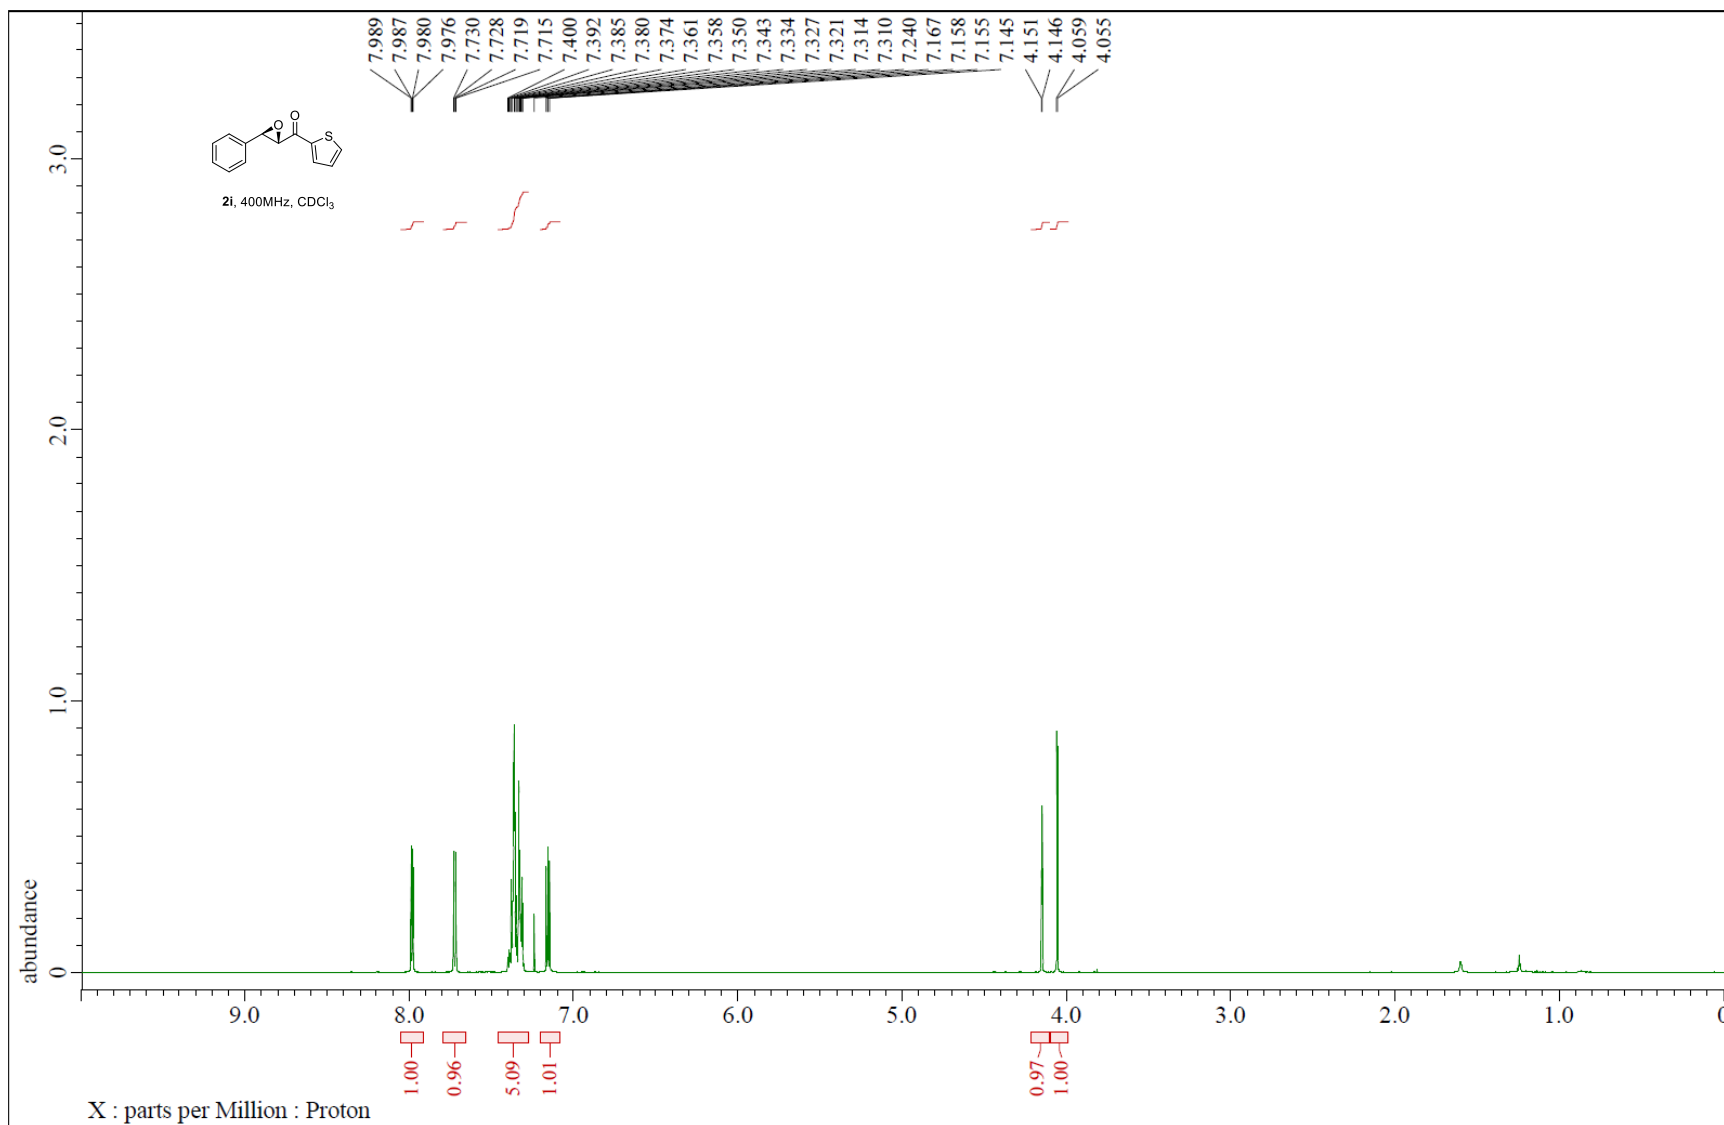

<sup>13</sup>C-NMR of compound **2i**

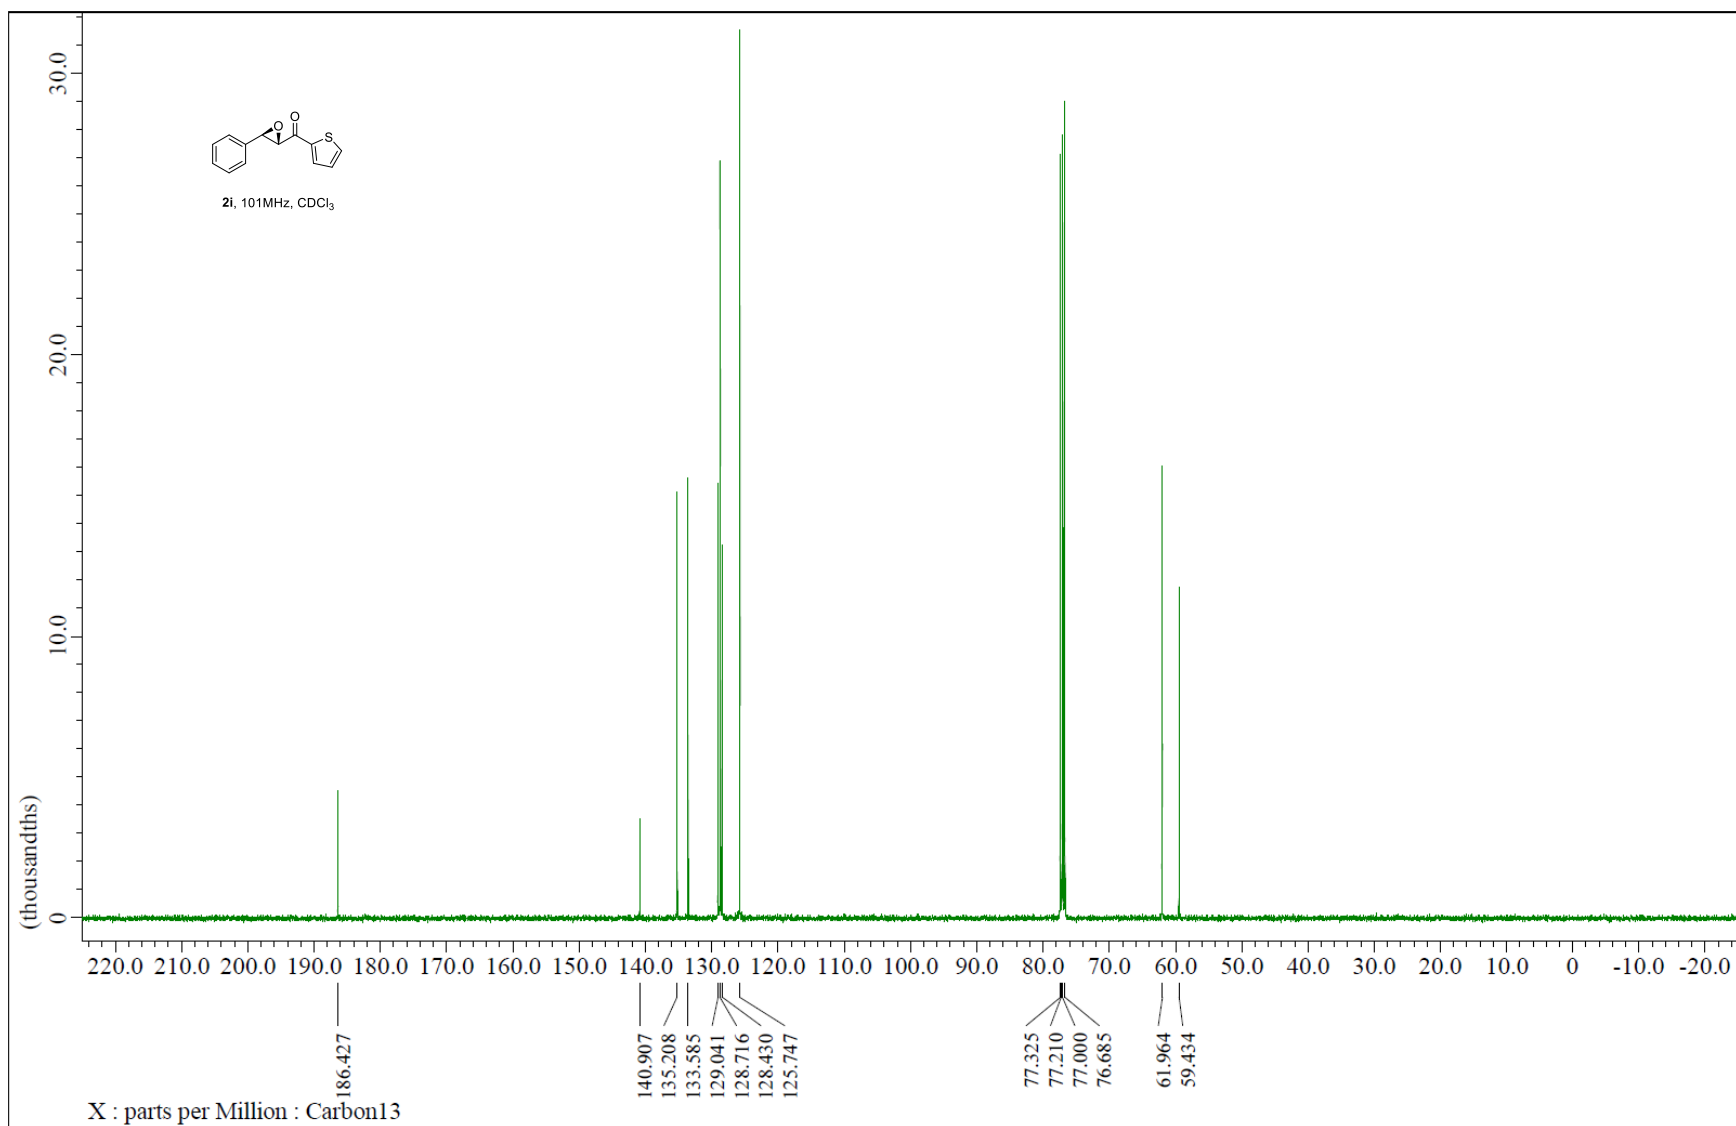

<sup>1</sup>H-NMR of compound **2j**

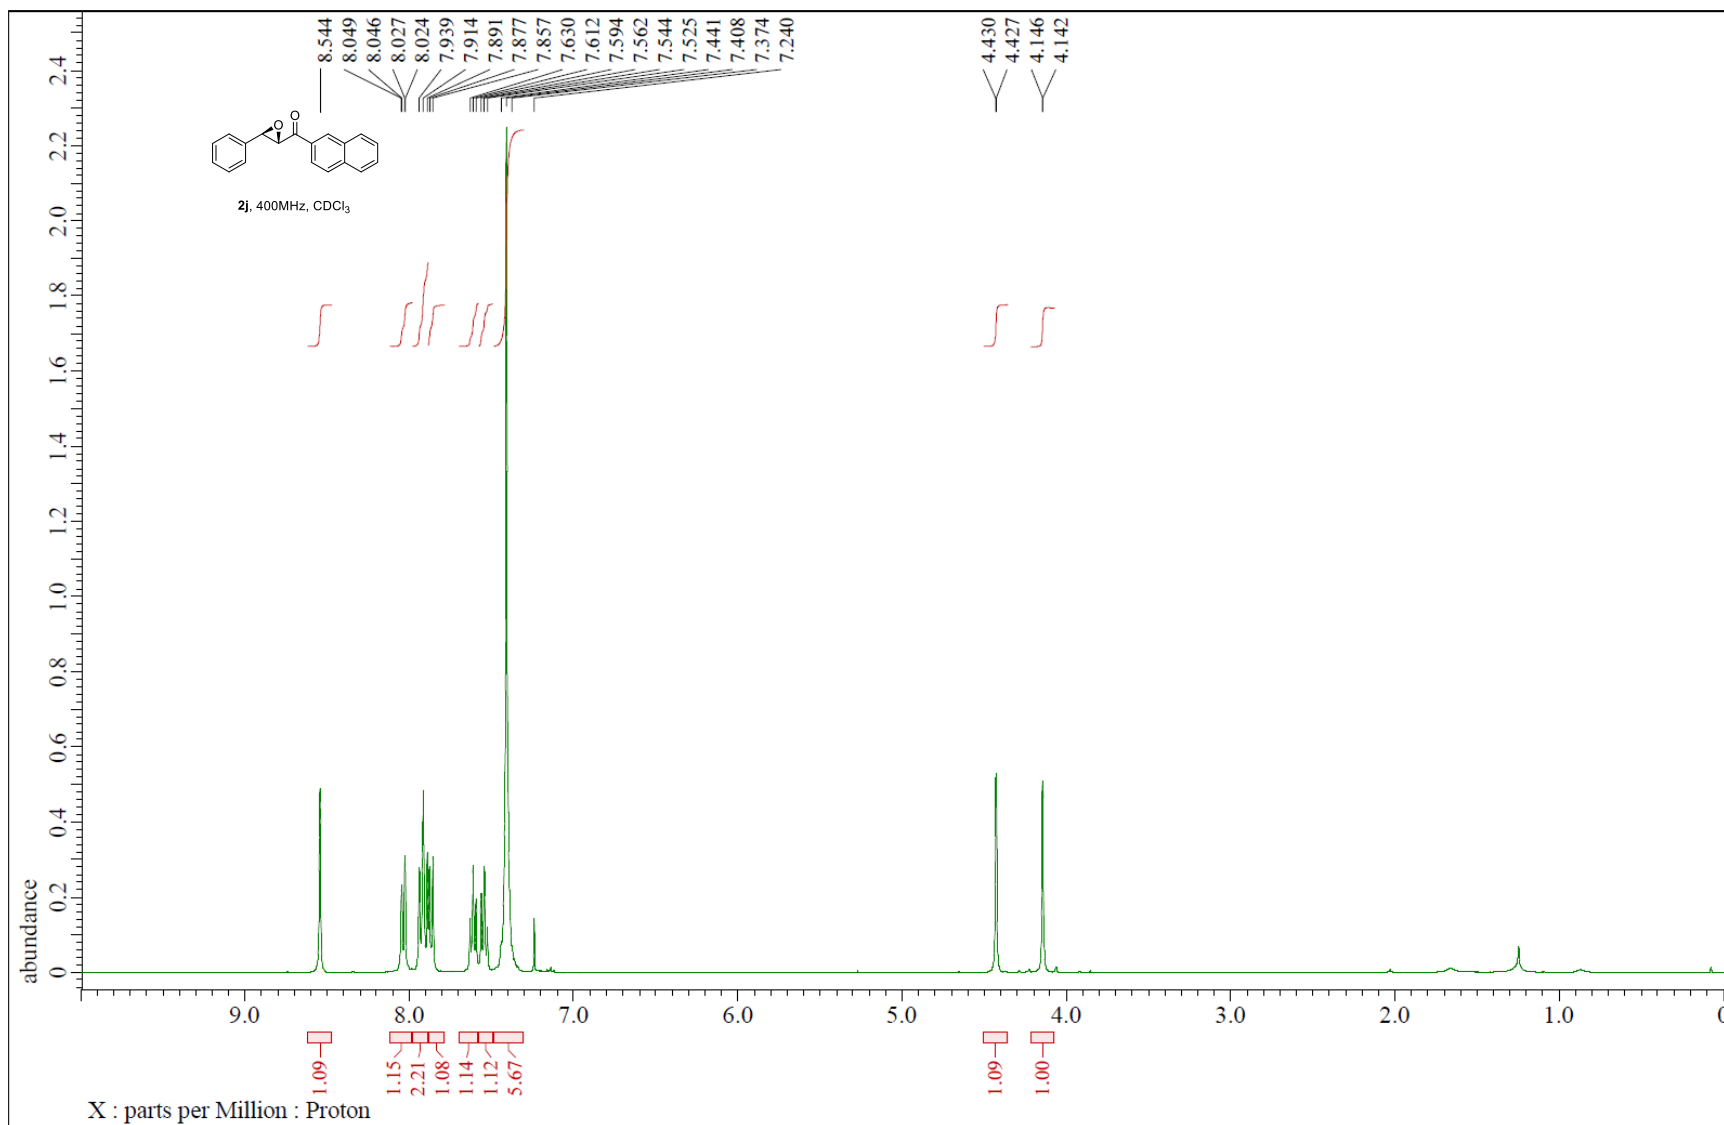

<sup>13</sup>C-NMR of compound **2j**

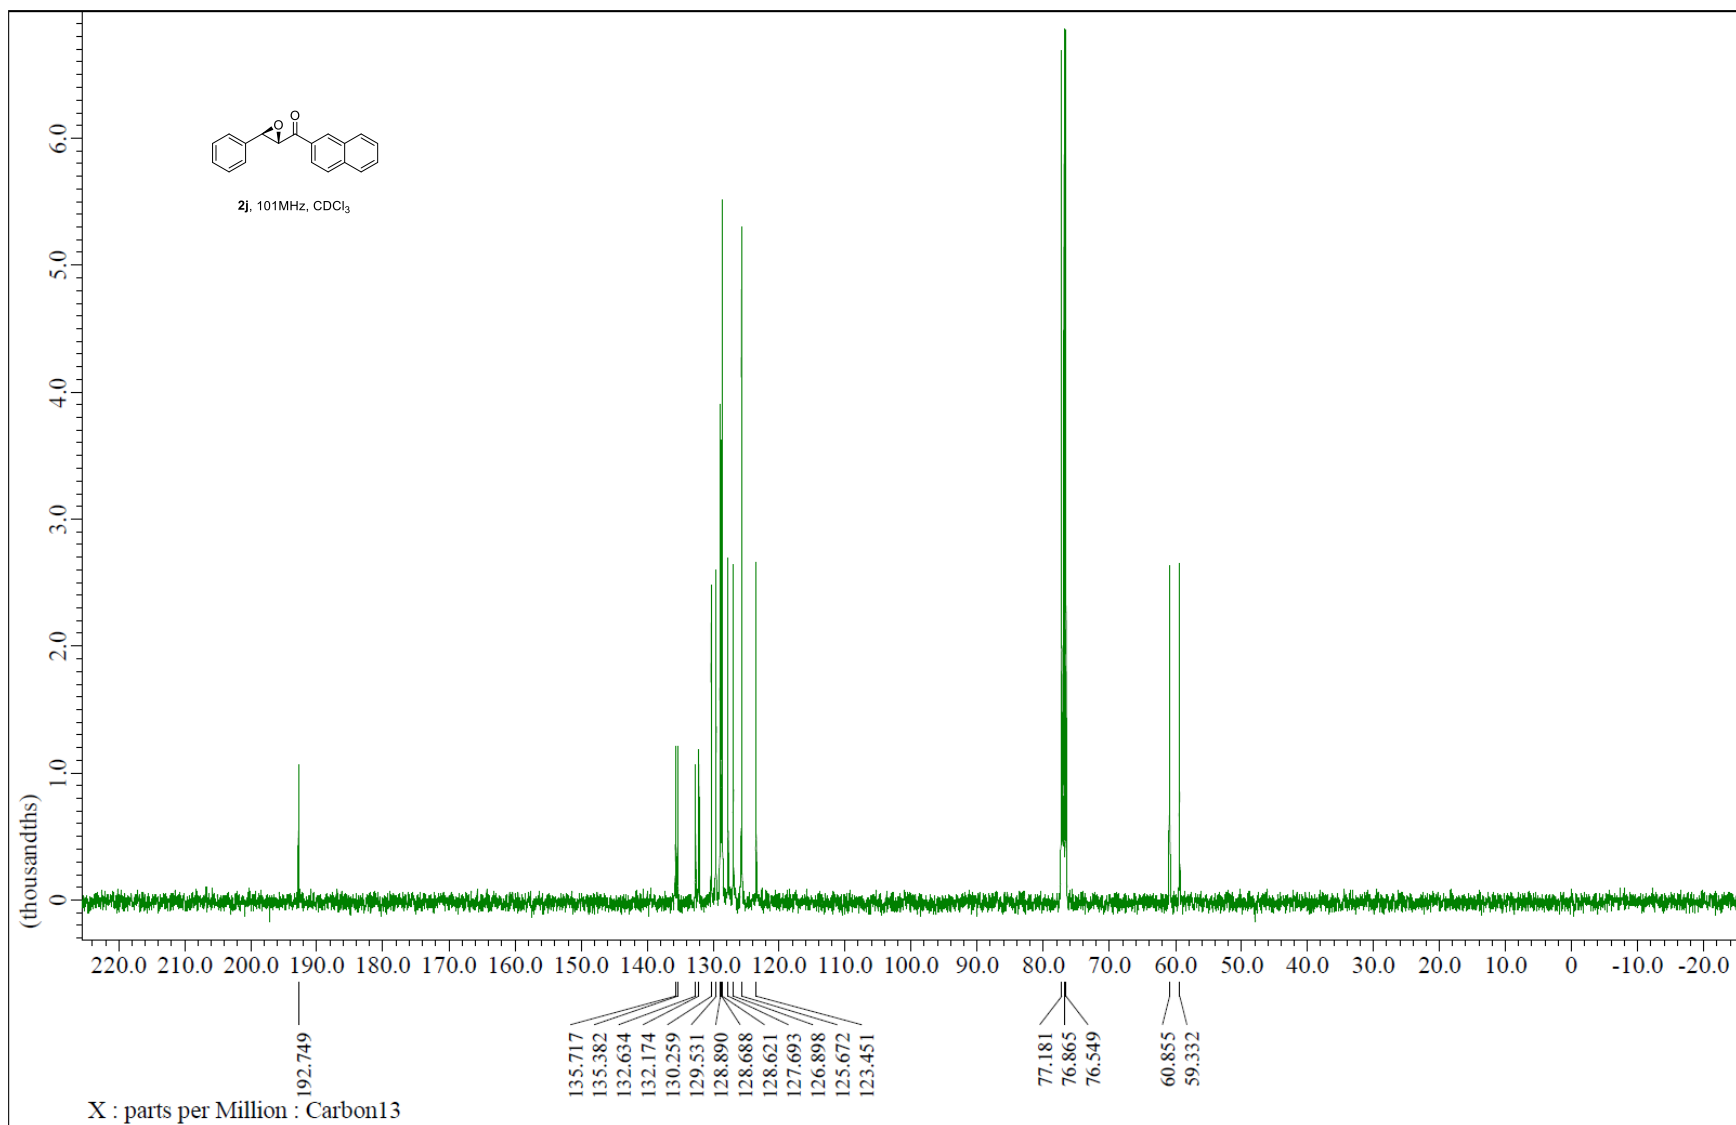

<sup>1</sup>H-NMR of compound **21**

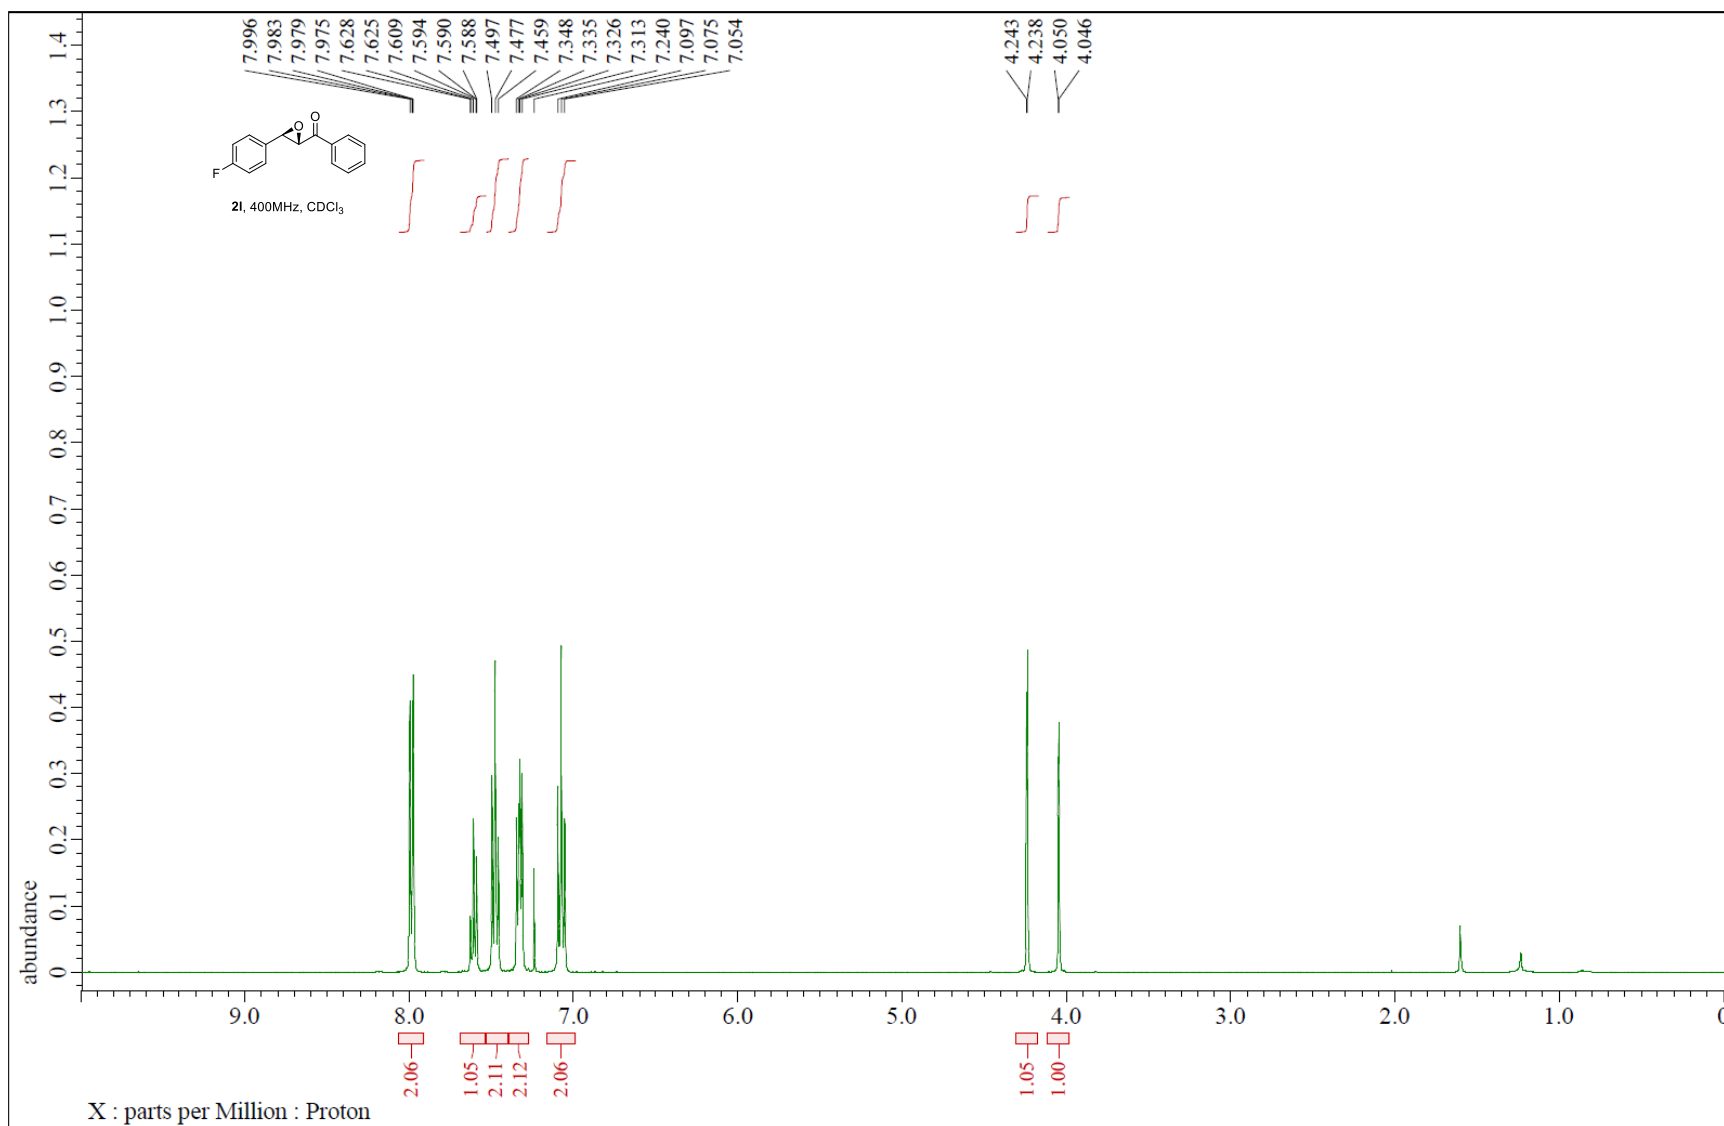

<sup>13</sup>C-NMR of compound **21**

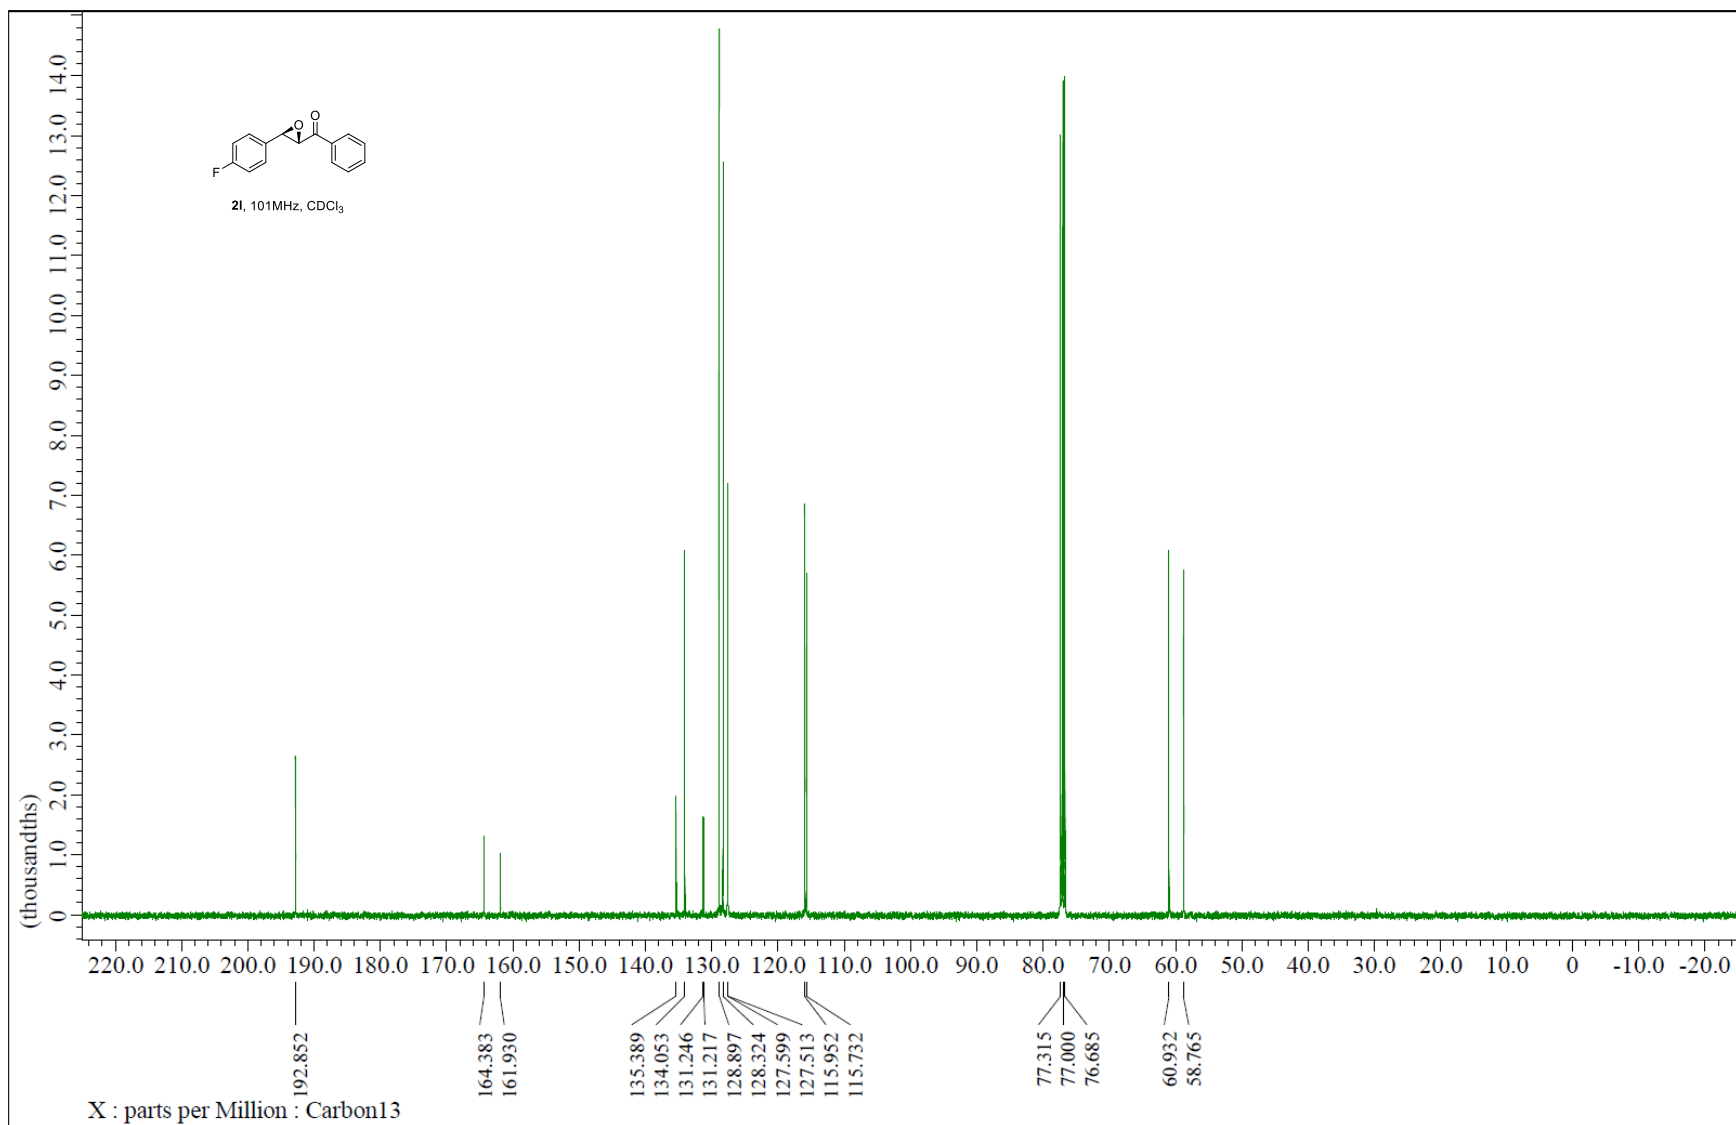

<sup>1</sup>H-NMR of compound **2m**

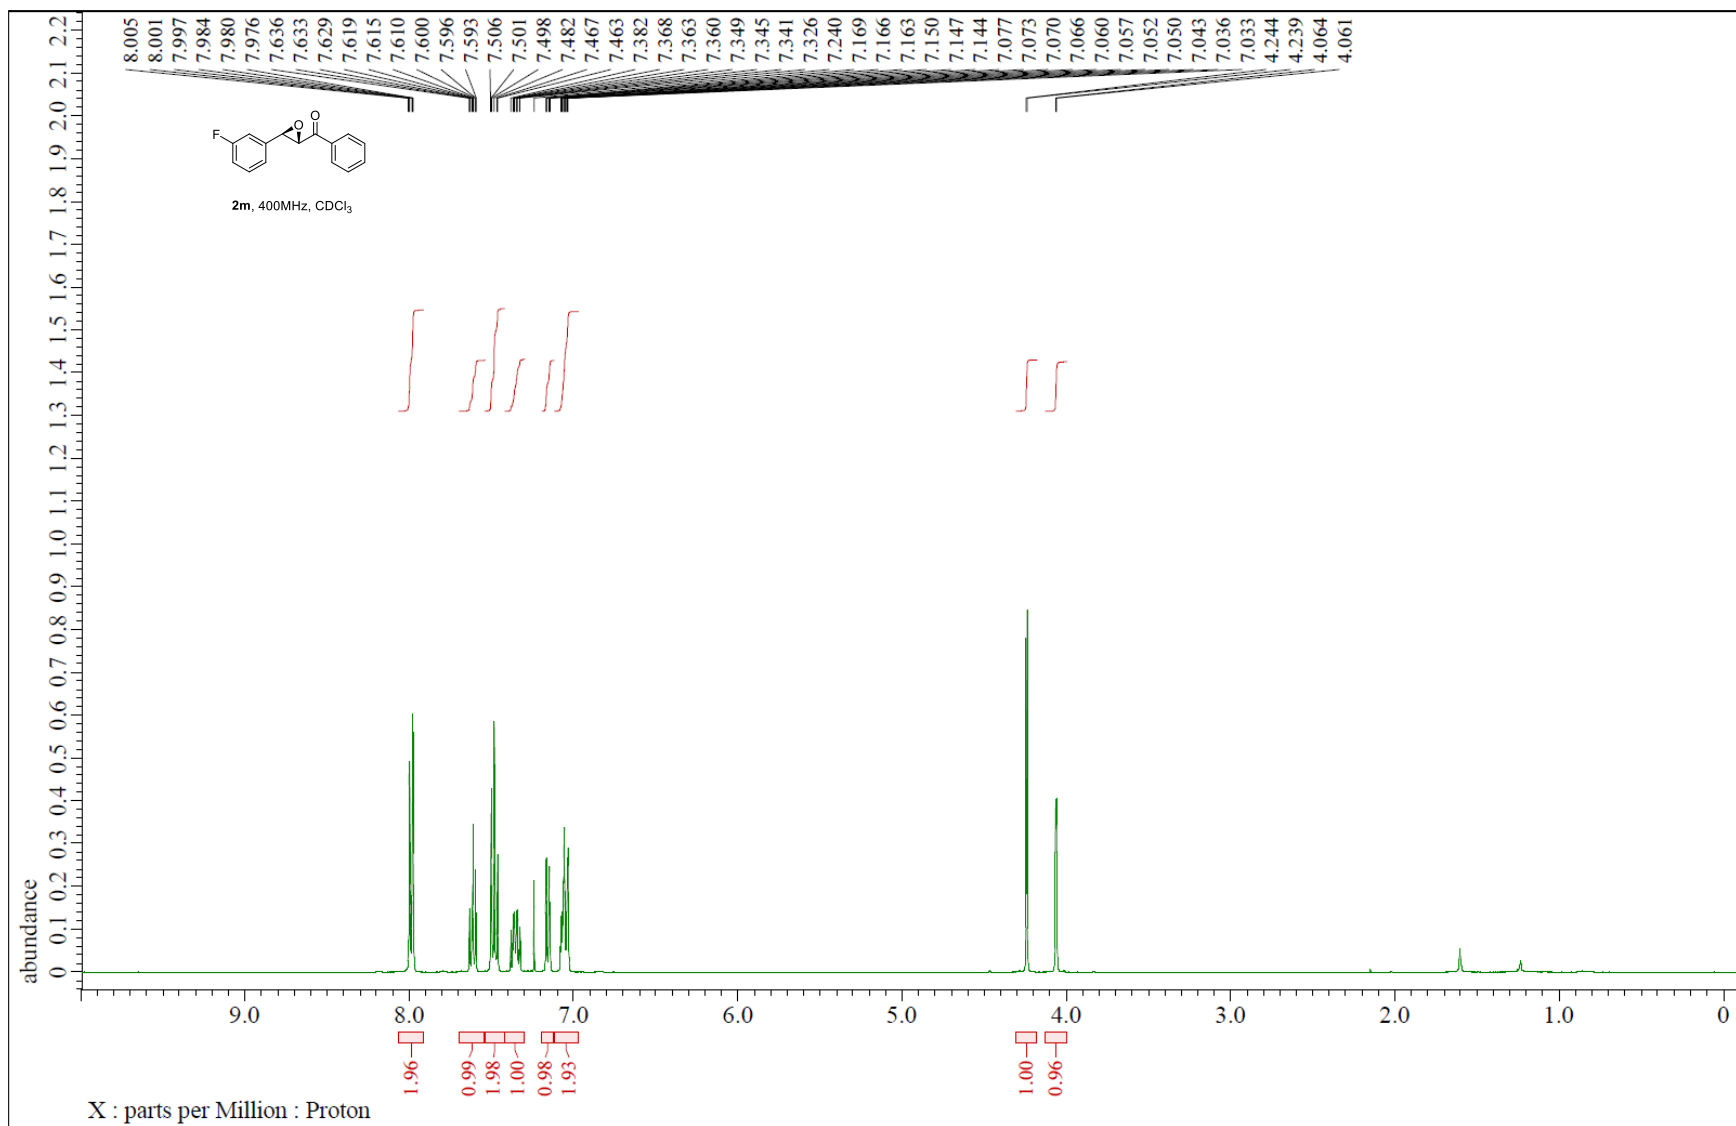

<sup>13</sup>C-NMR of compound **2m**

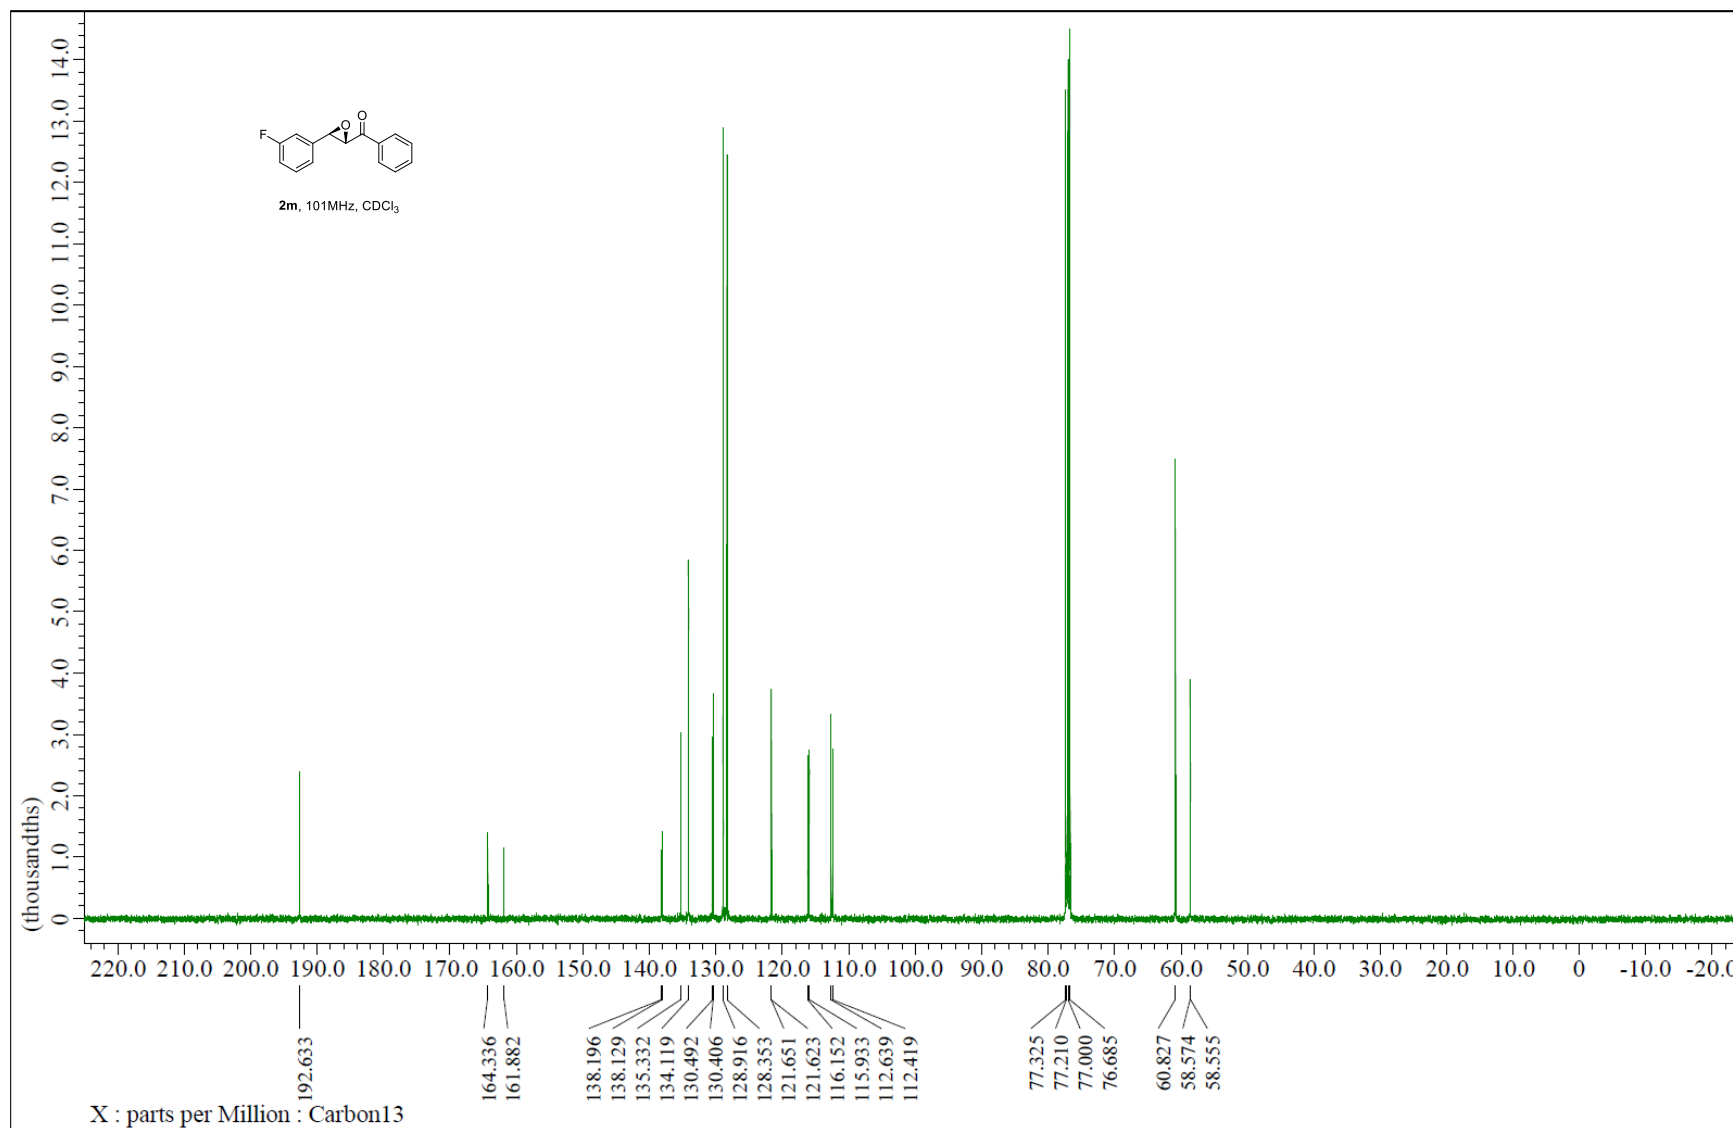



<sup>1</sup>H-NMR of compound **2n**

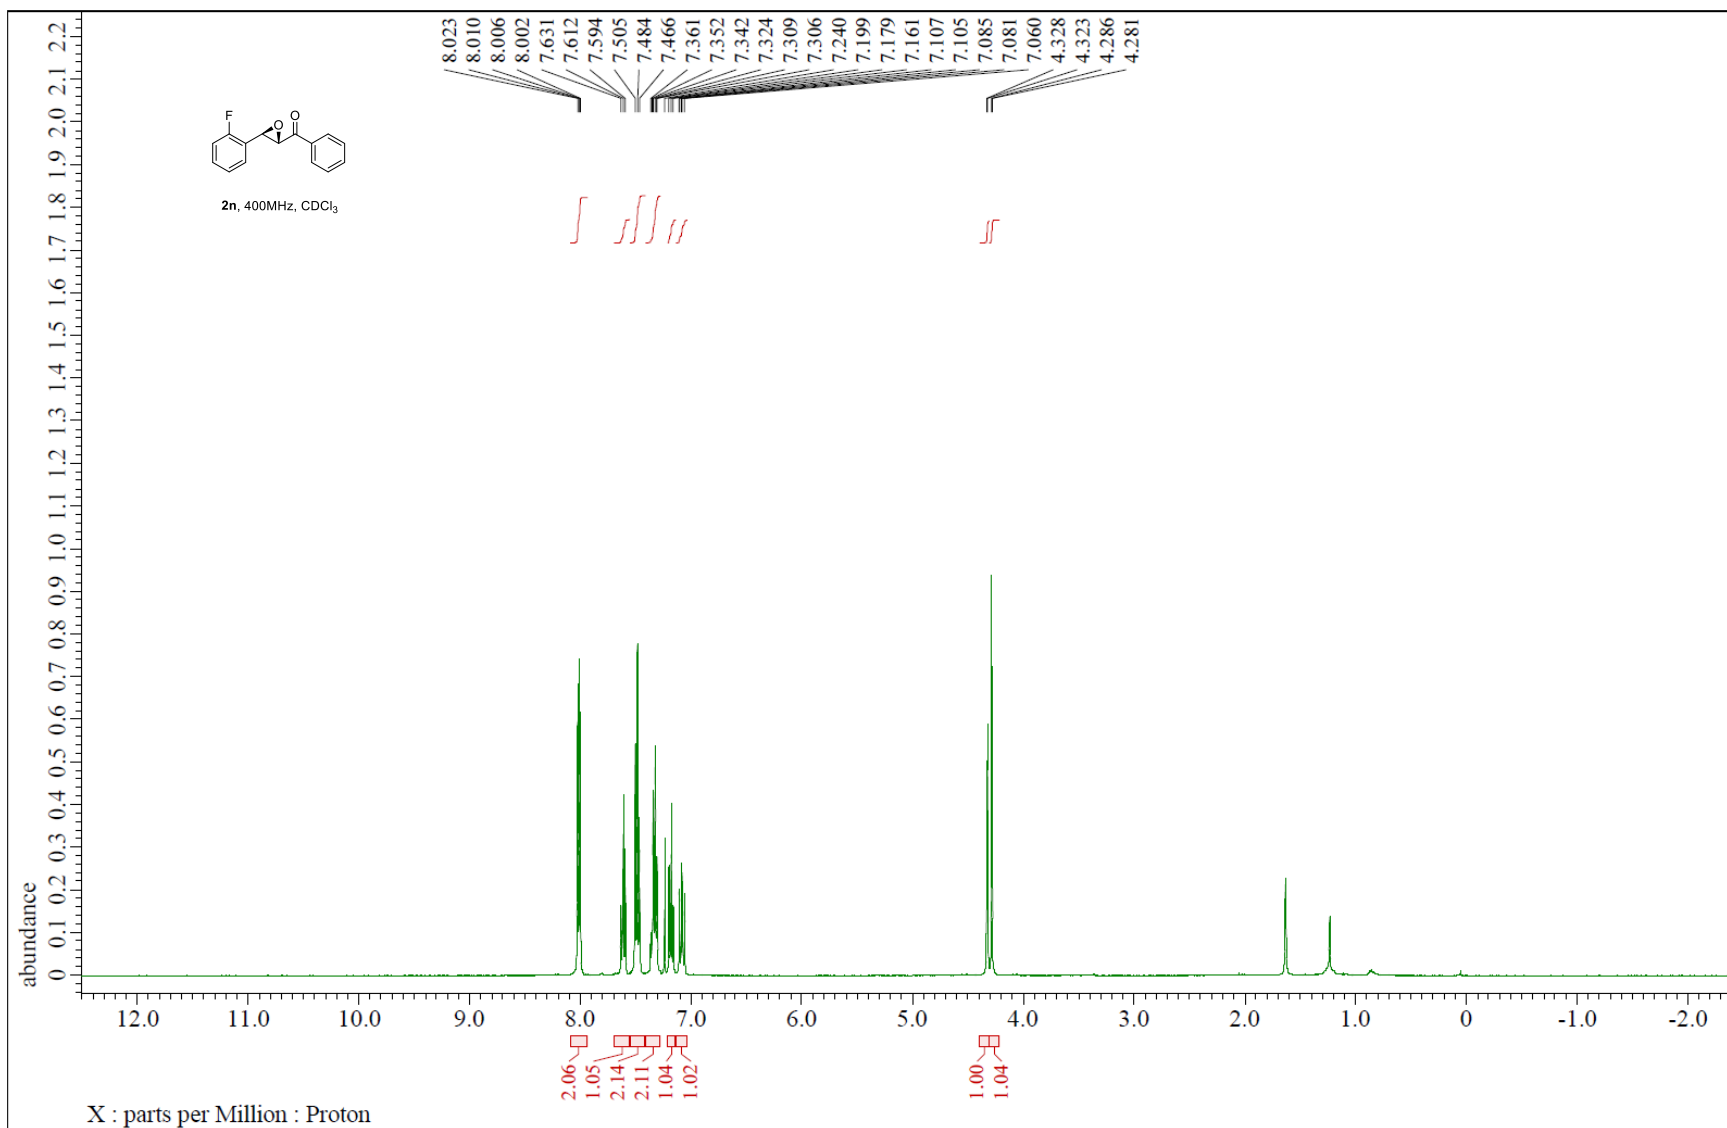

<sup>13</sup>C-NMR of compound **2n**

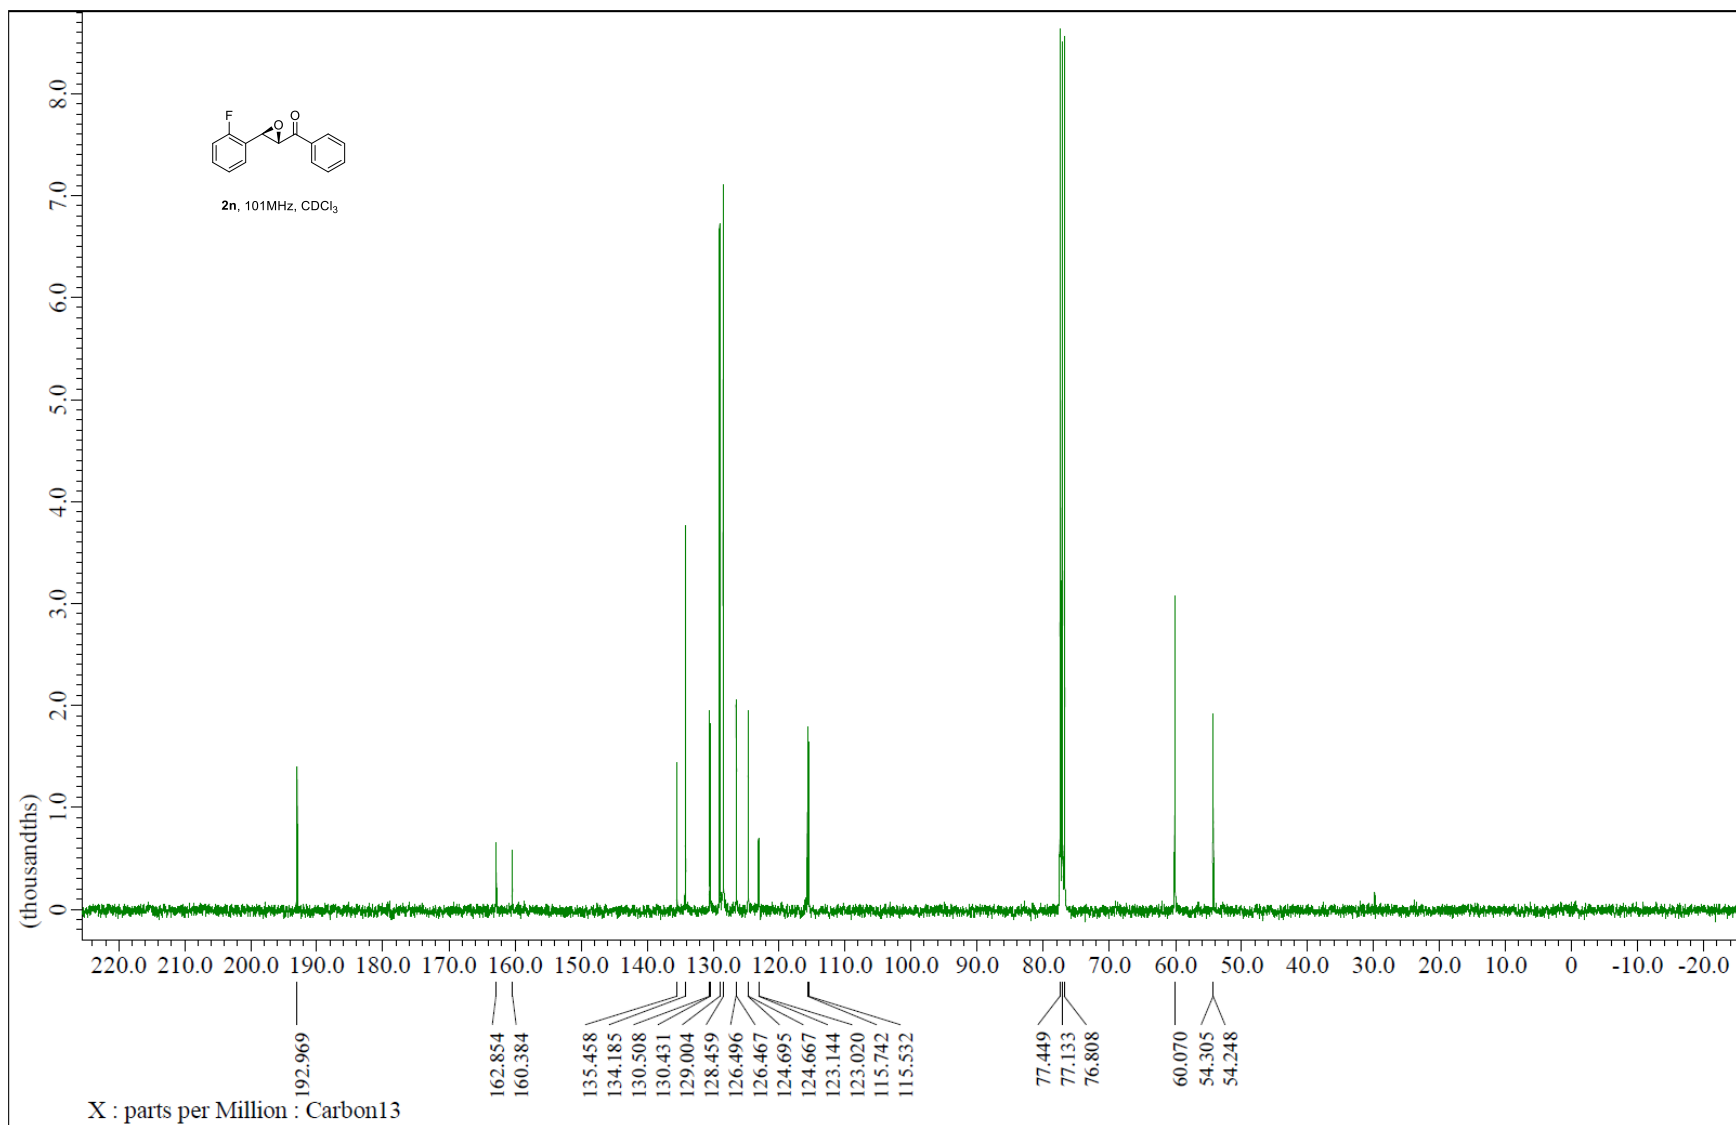

<sup>1</sup>H-NMR of compound **2o**

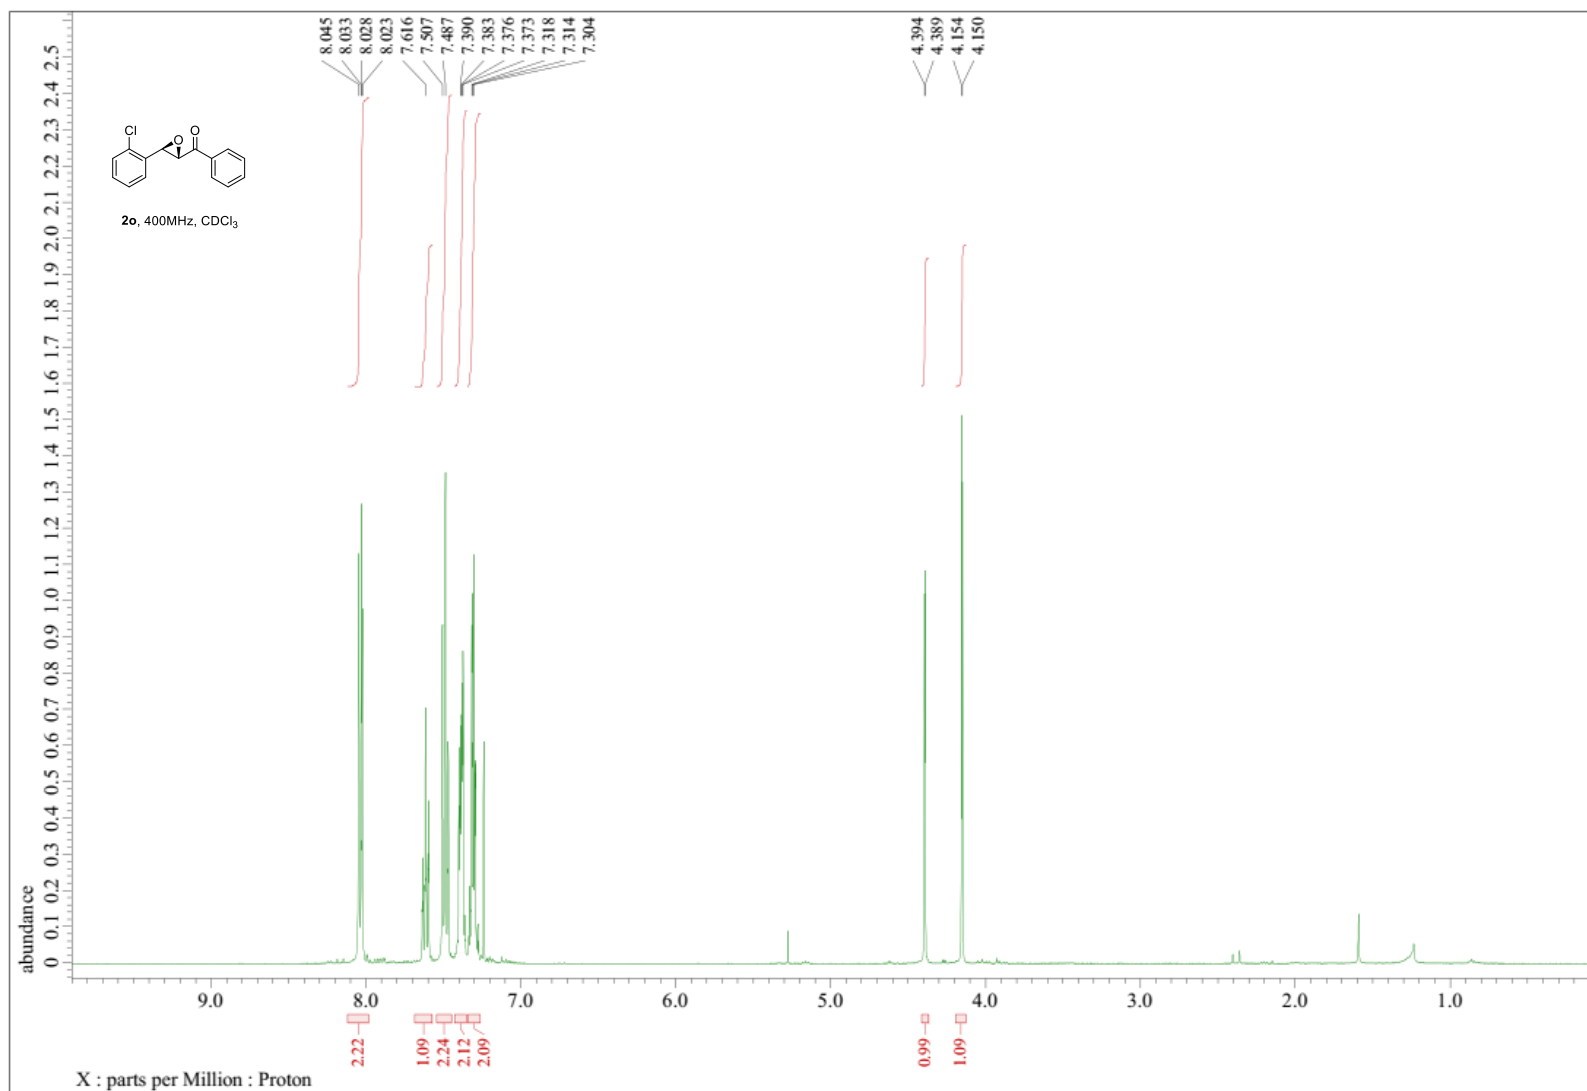

<sup>13</sup>C-NMR of compound **2o**

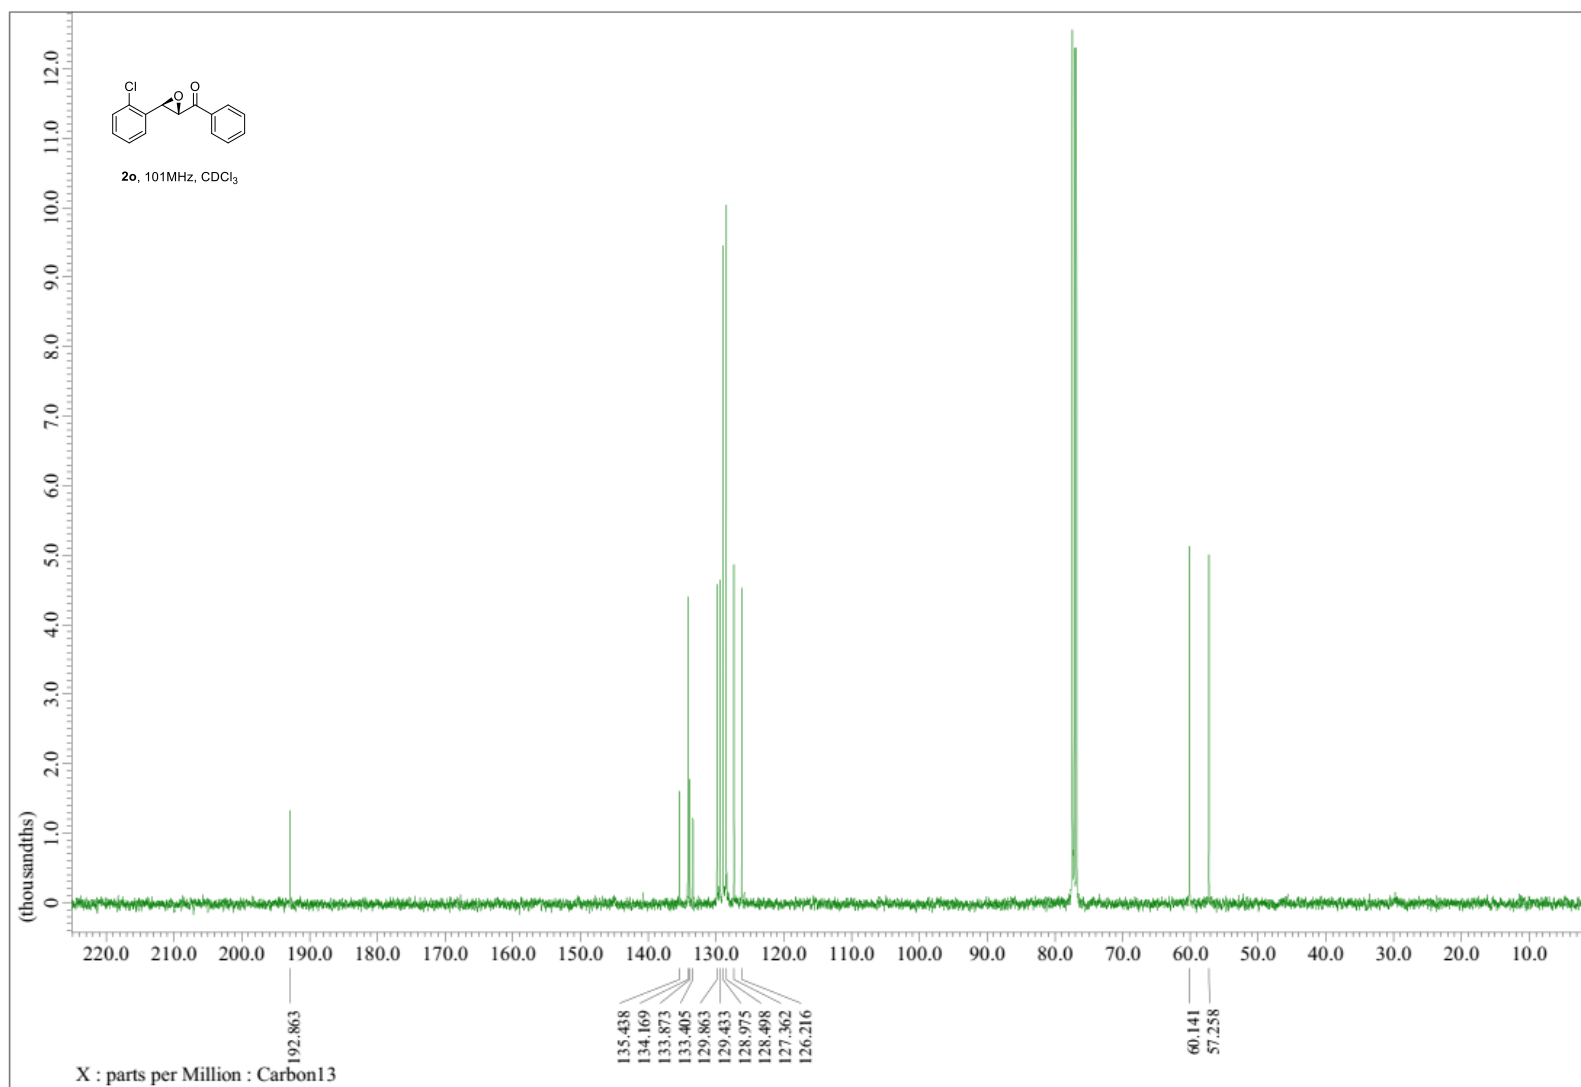

<sup>1</sup>H-NMR of compound **2p**

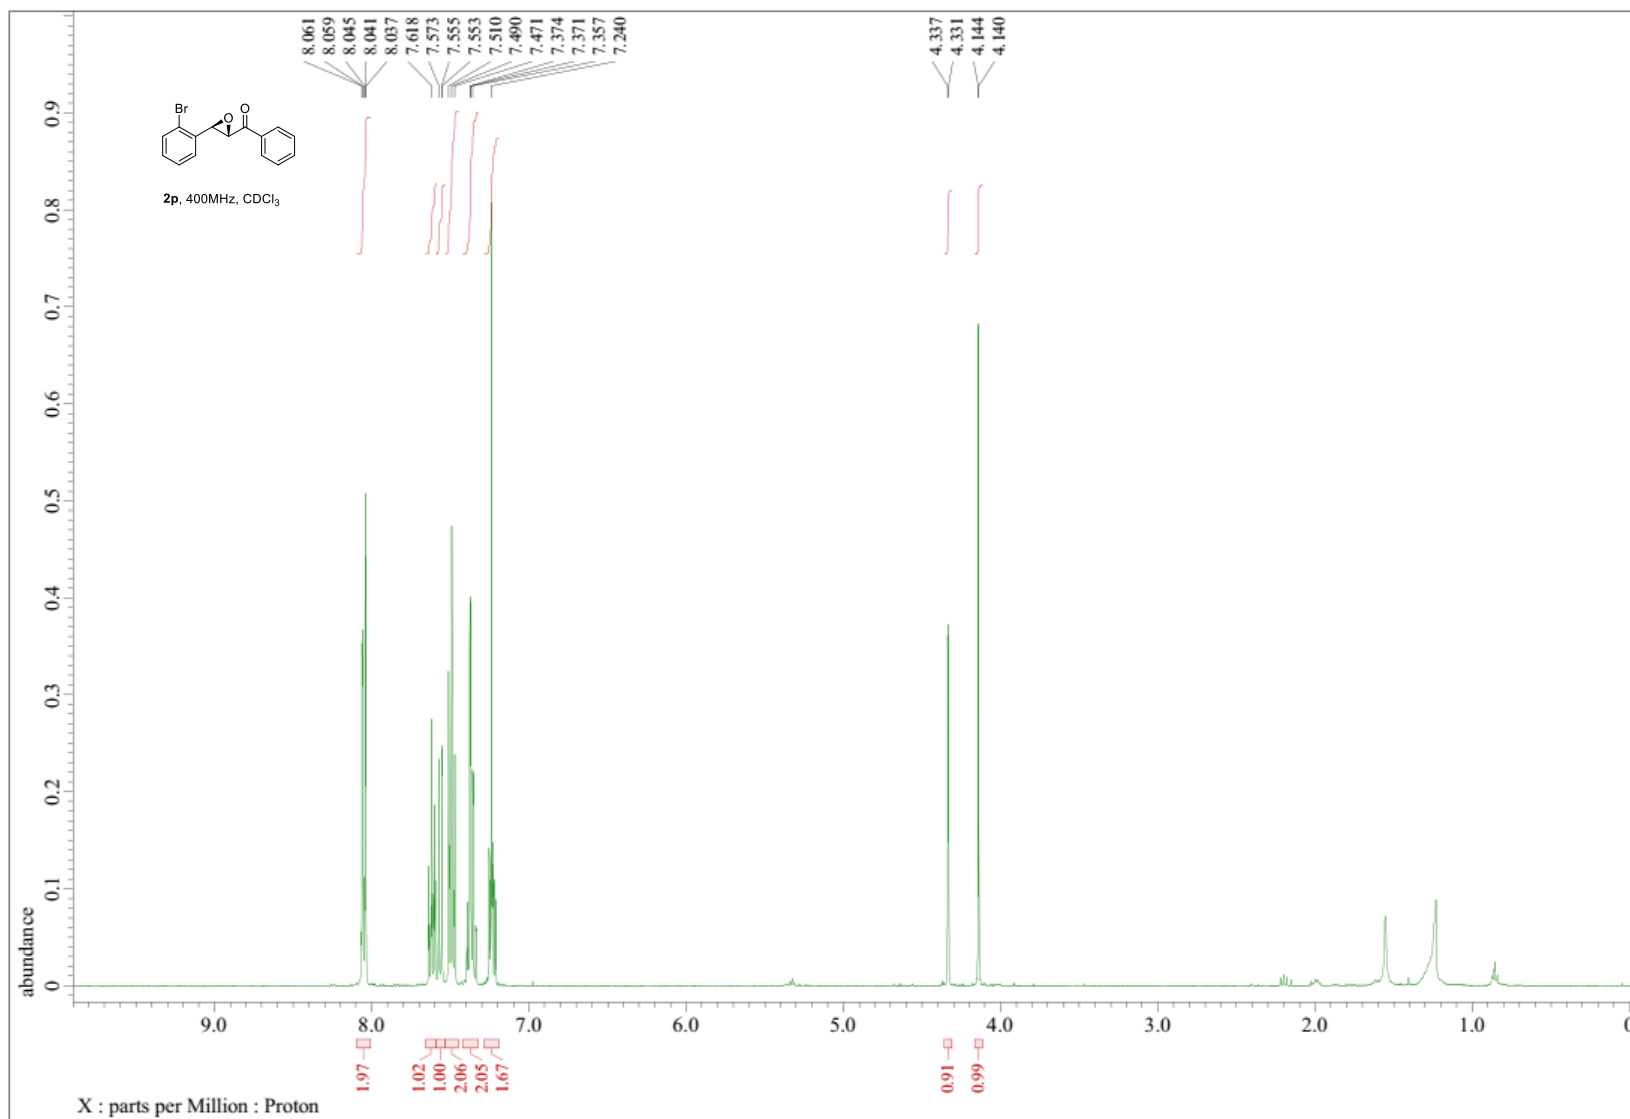

<sup>13</sup>C-NMR of compound **2p**

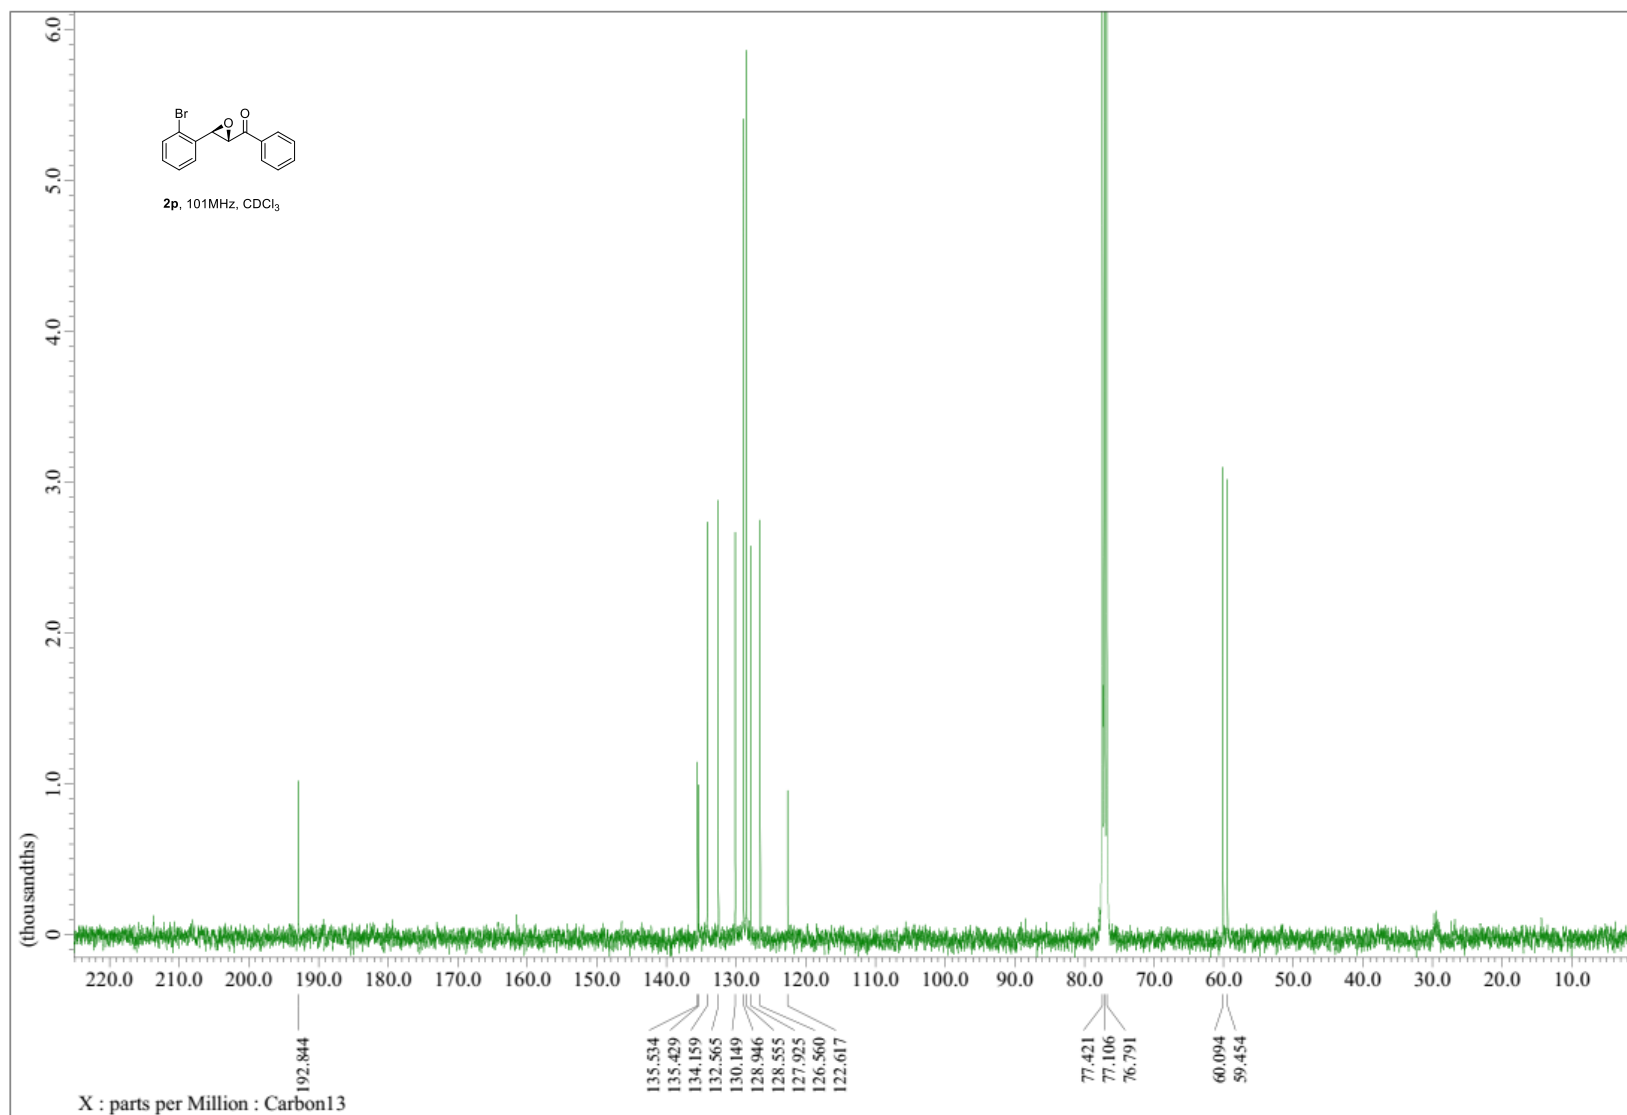

<sup>1</sup>H-NMR of compound **2q**

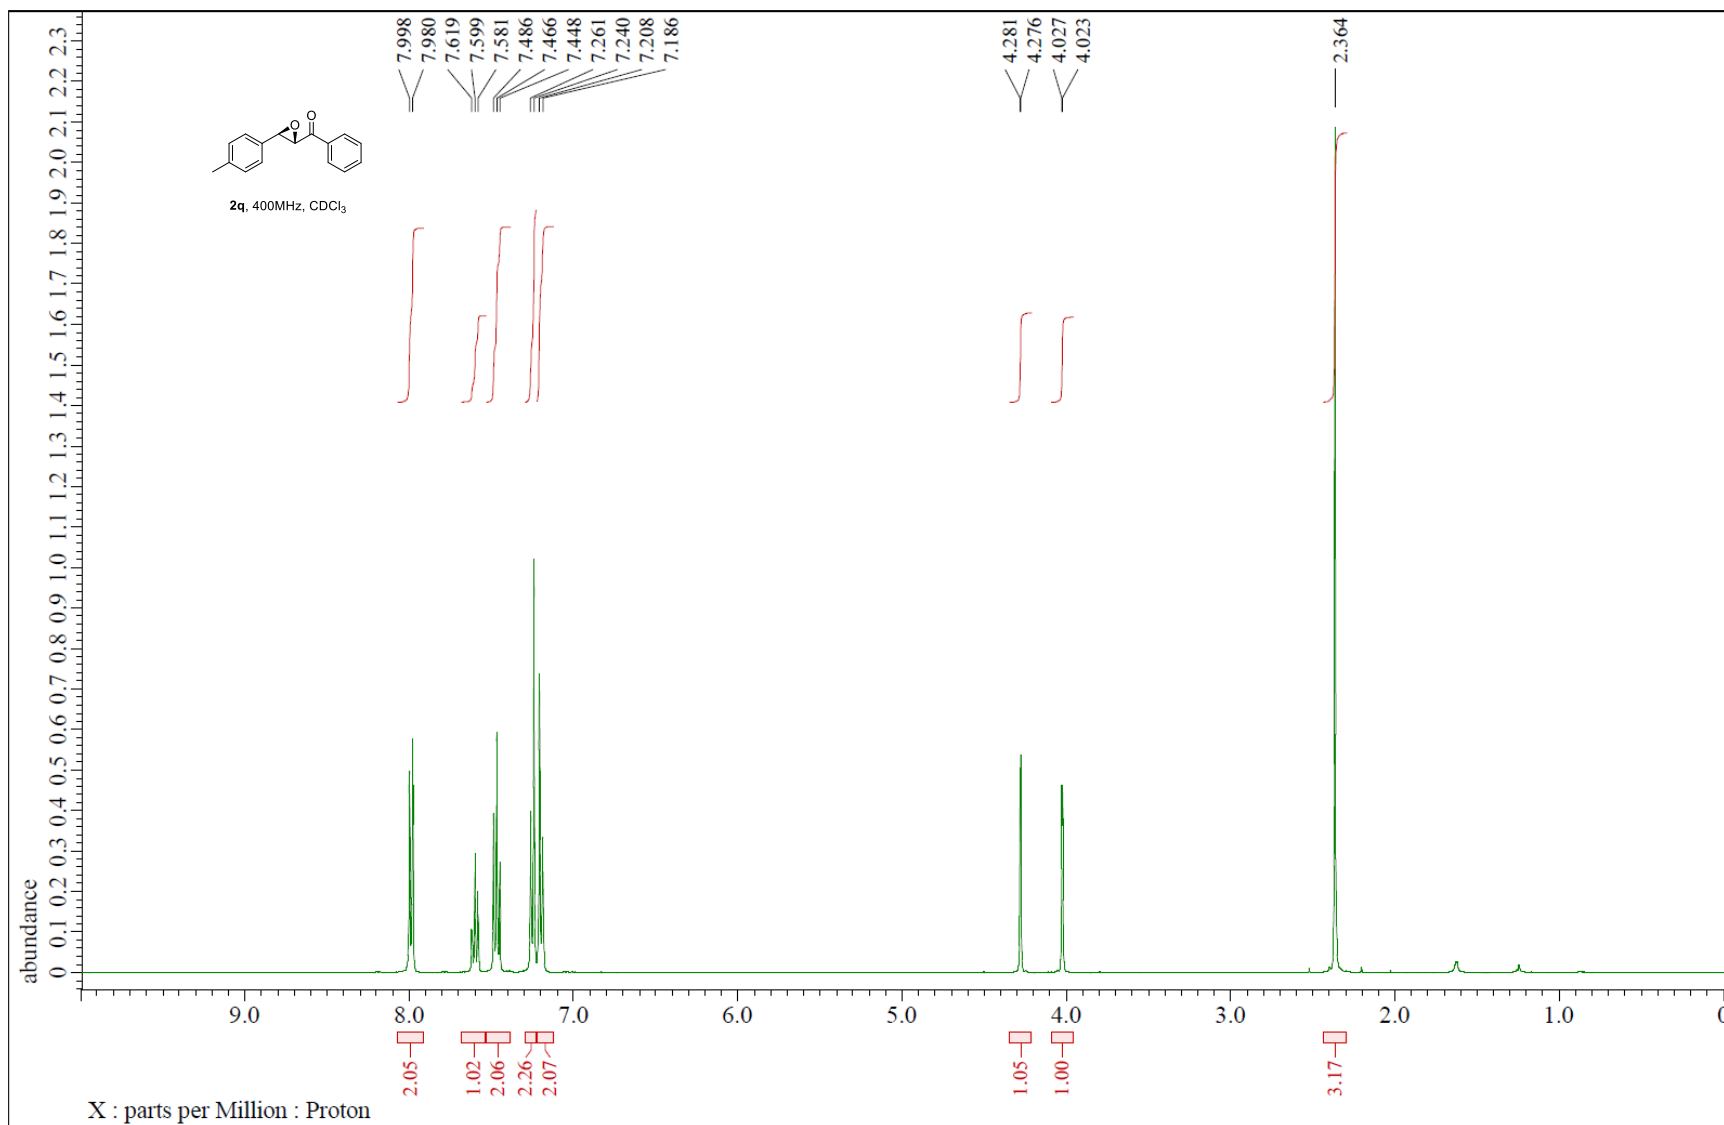

<sup>13</sup>C-NMR of compound **2q**

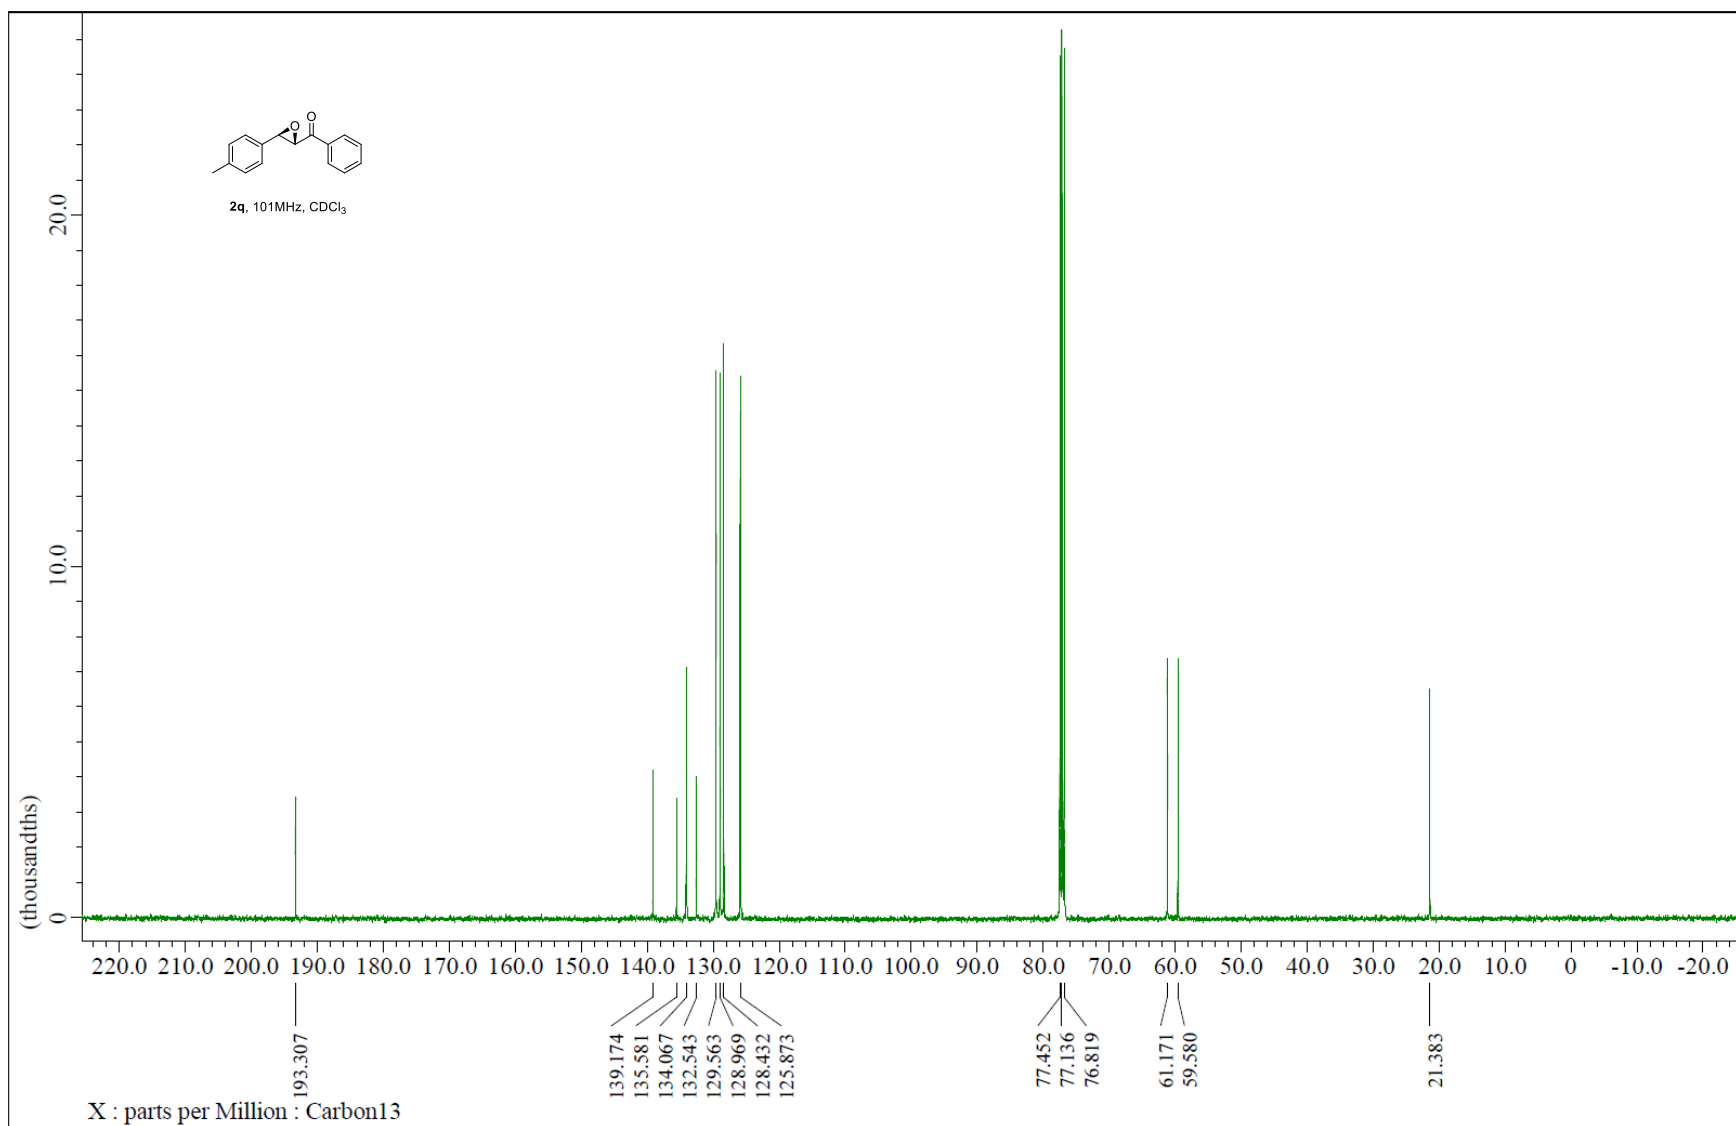



<sup>1</sup>H-NMR of compound **2r**

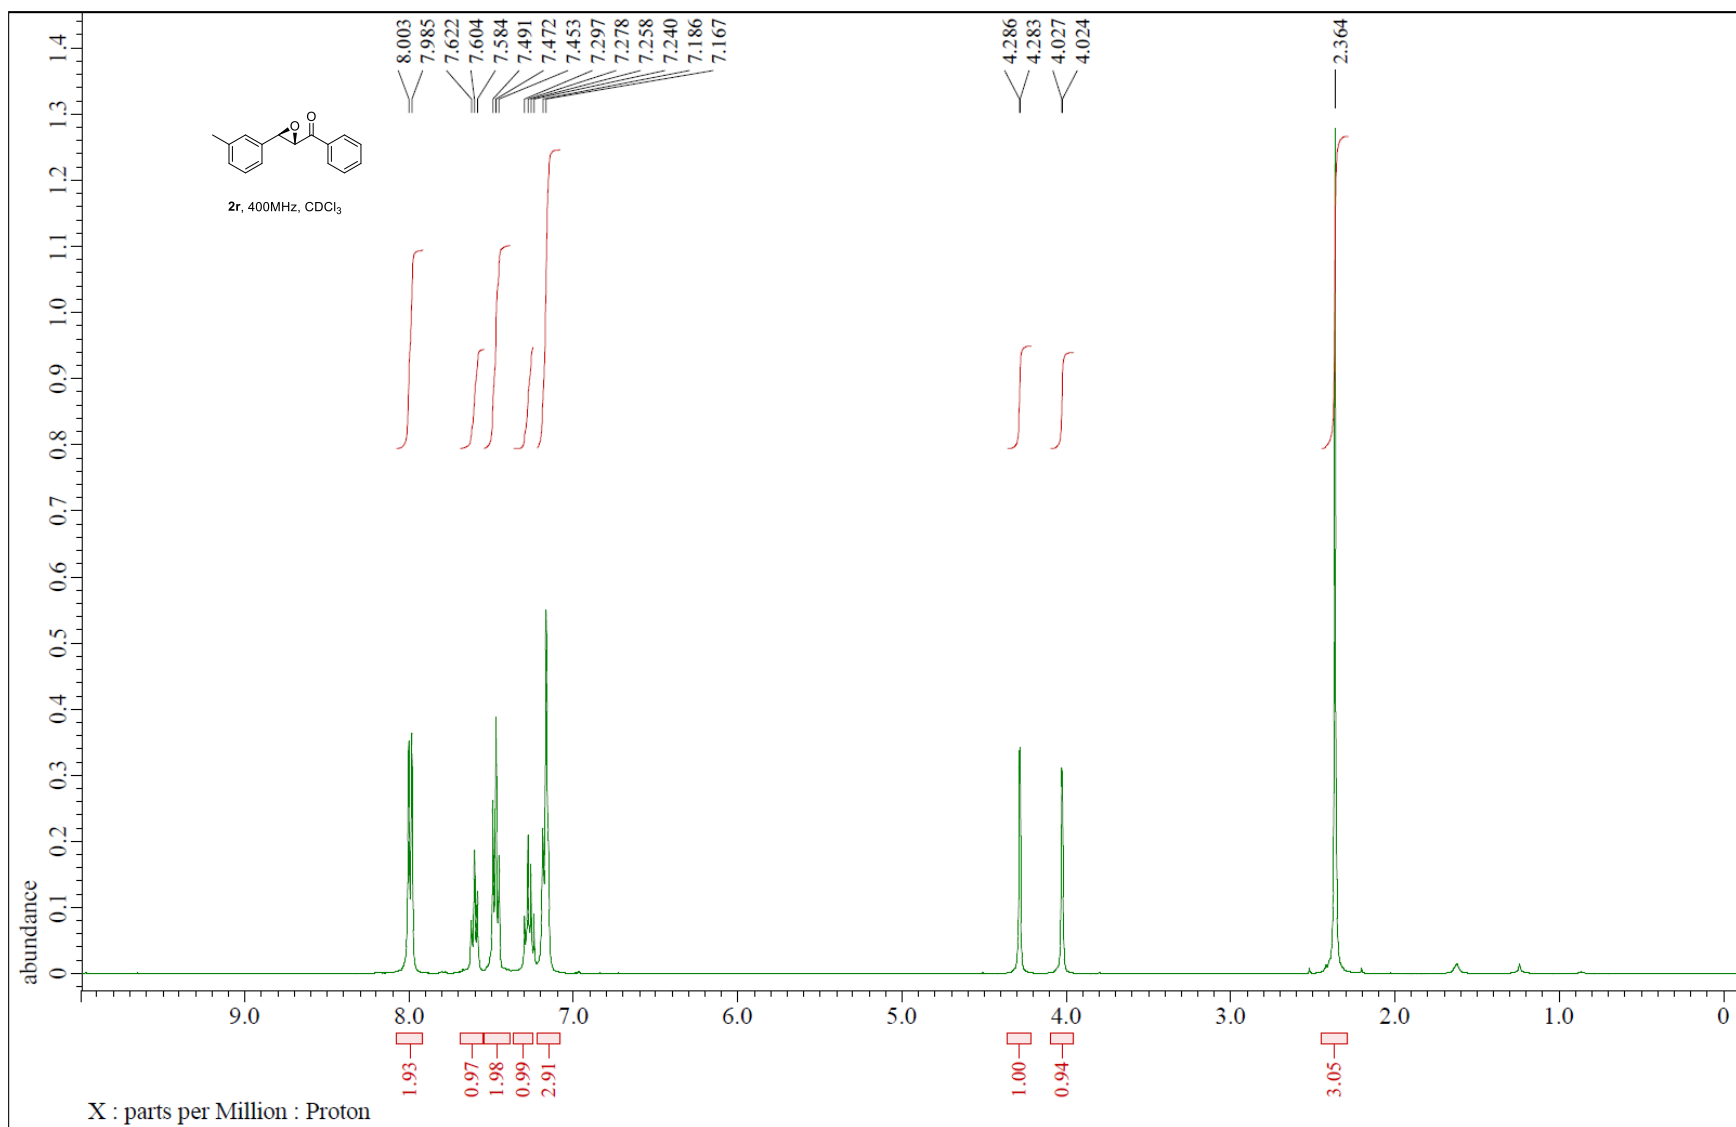

<sup>1</sup>H-NMR of compound **2r**

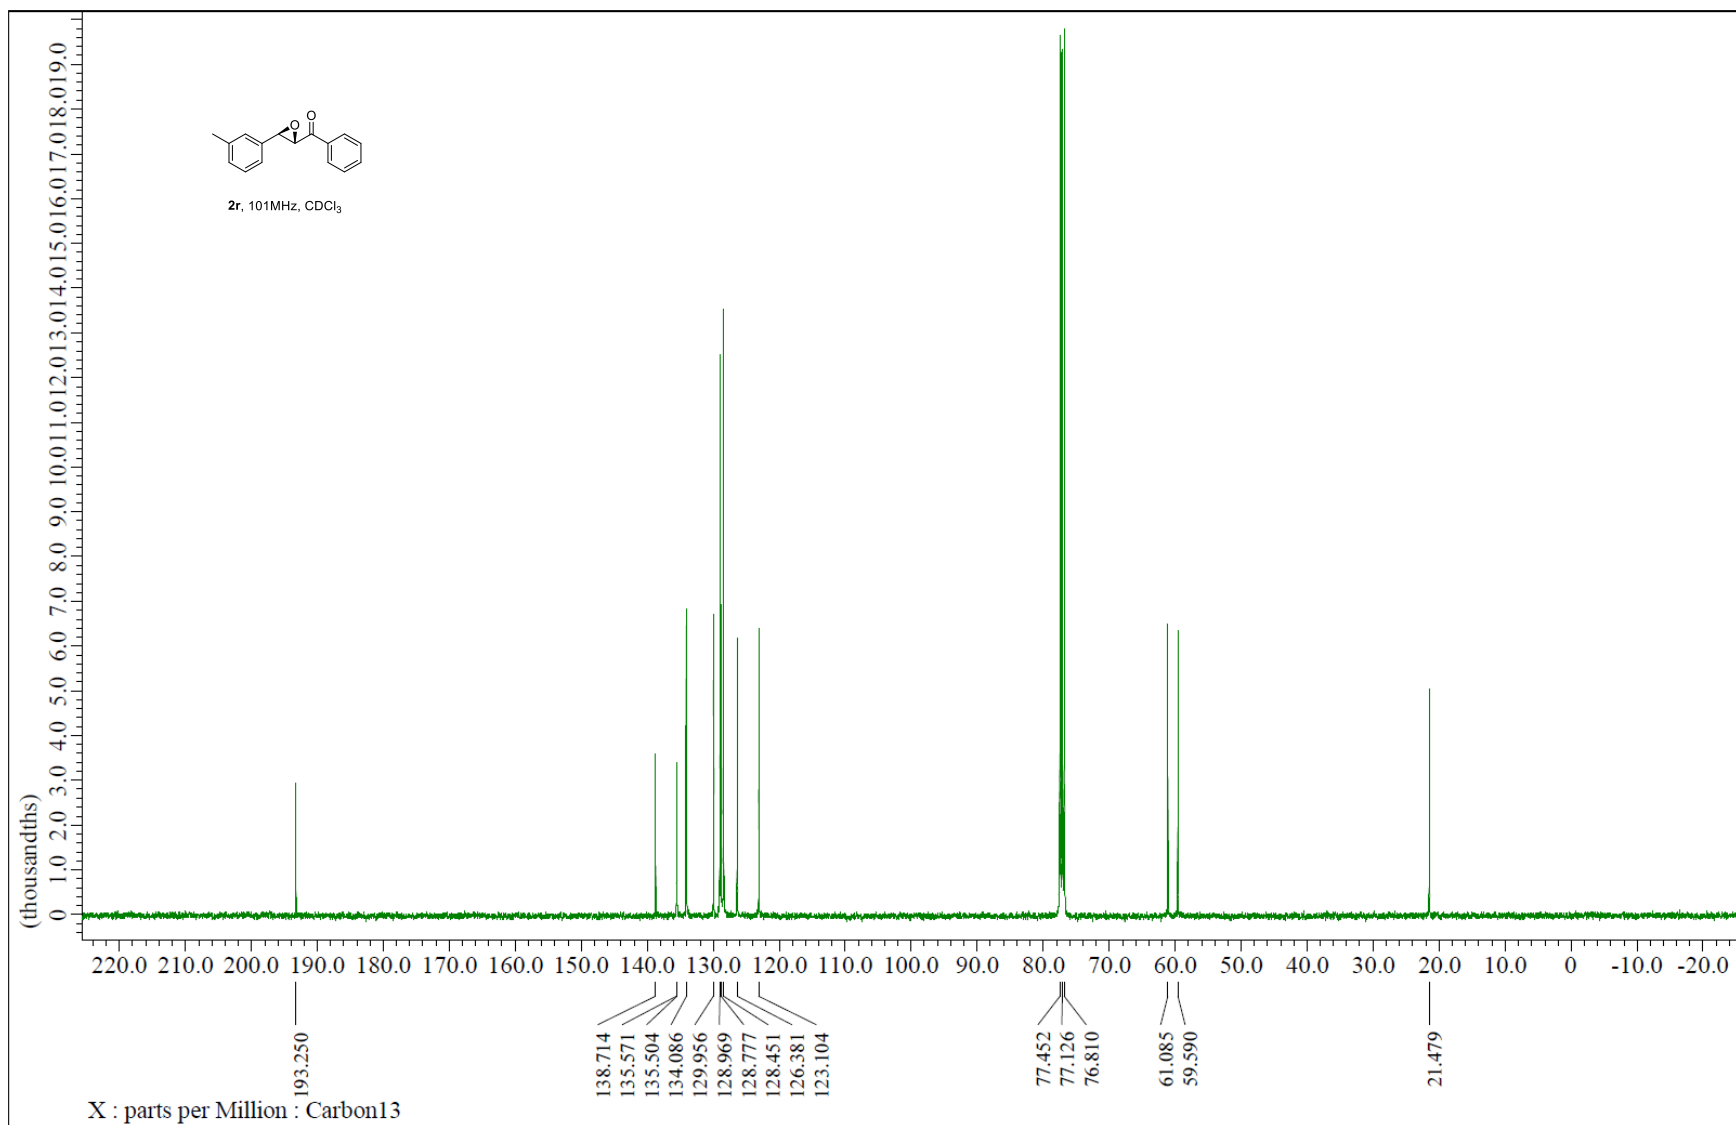

<sup>1</sup>H-NMR of compound **2s**

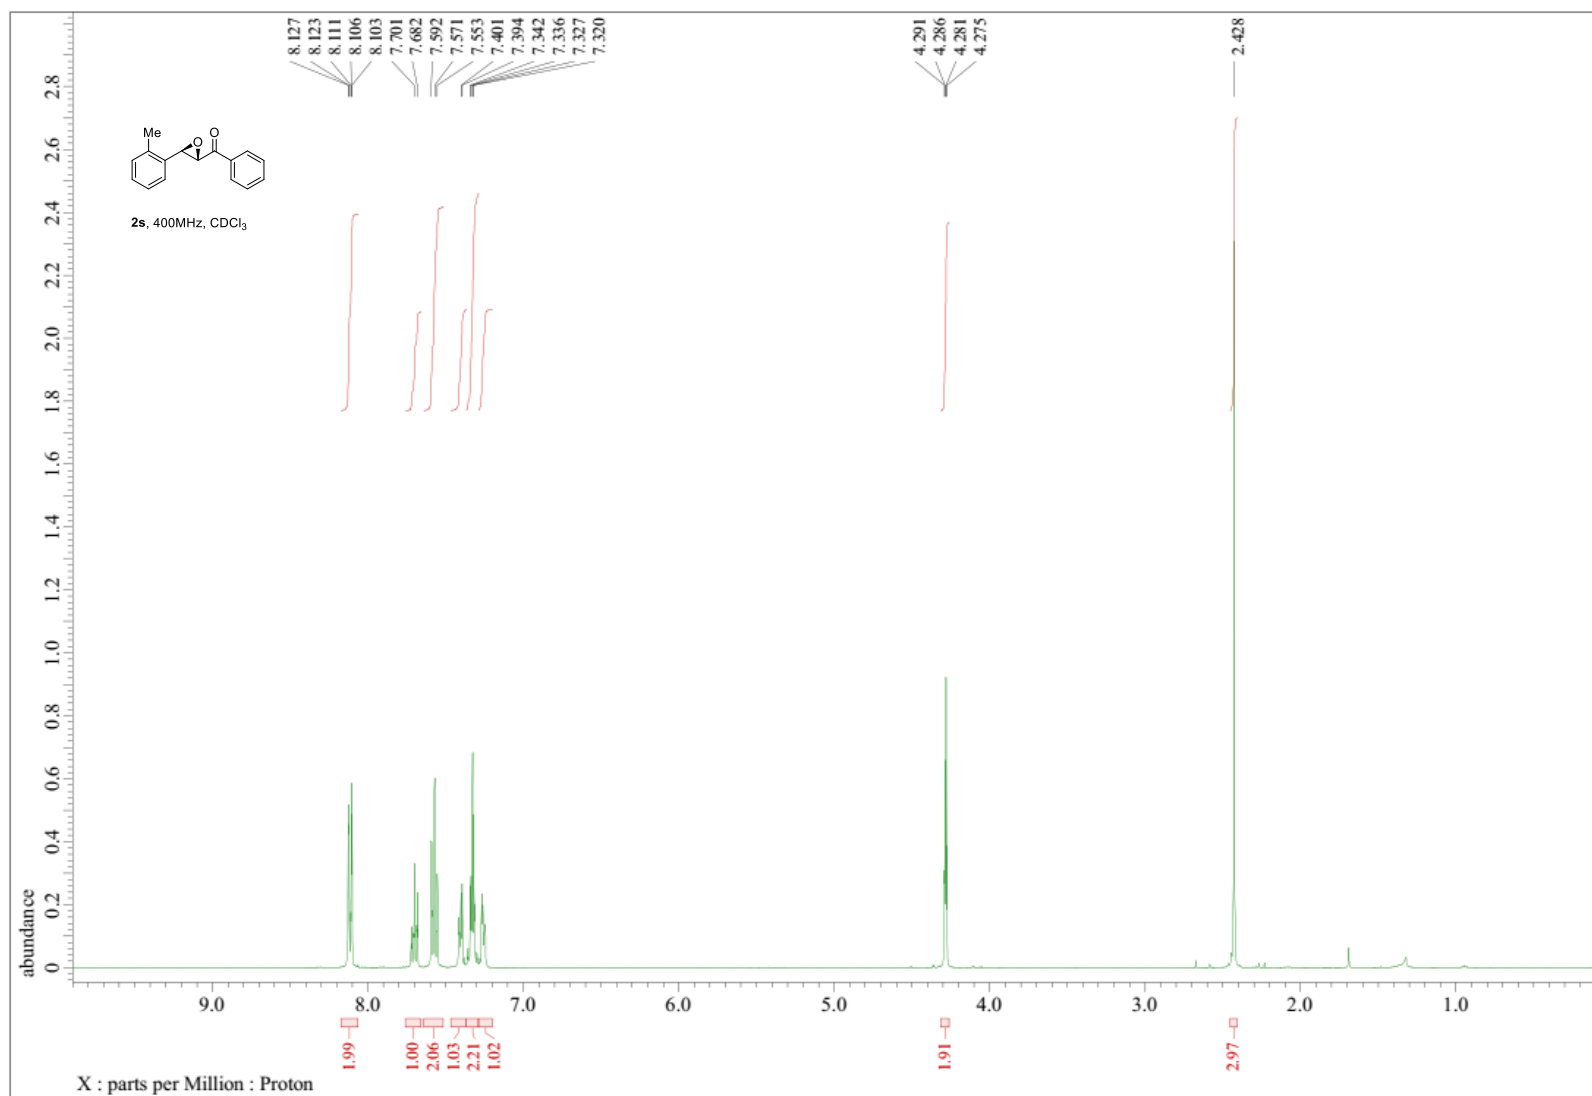

<sup>13</sup>C-NMR of compound **2s**

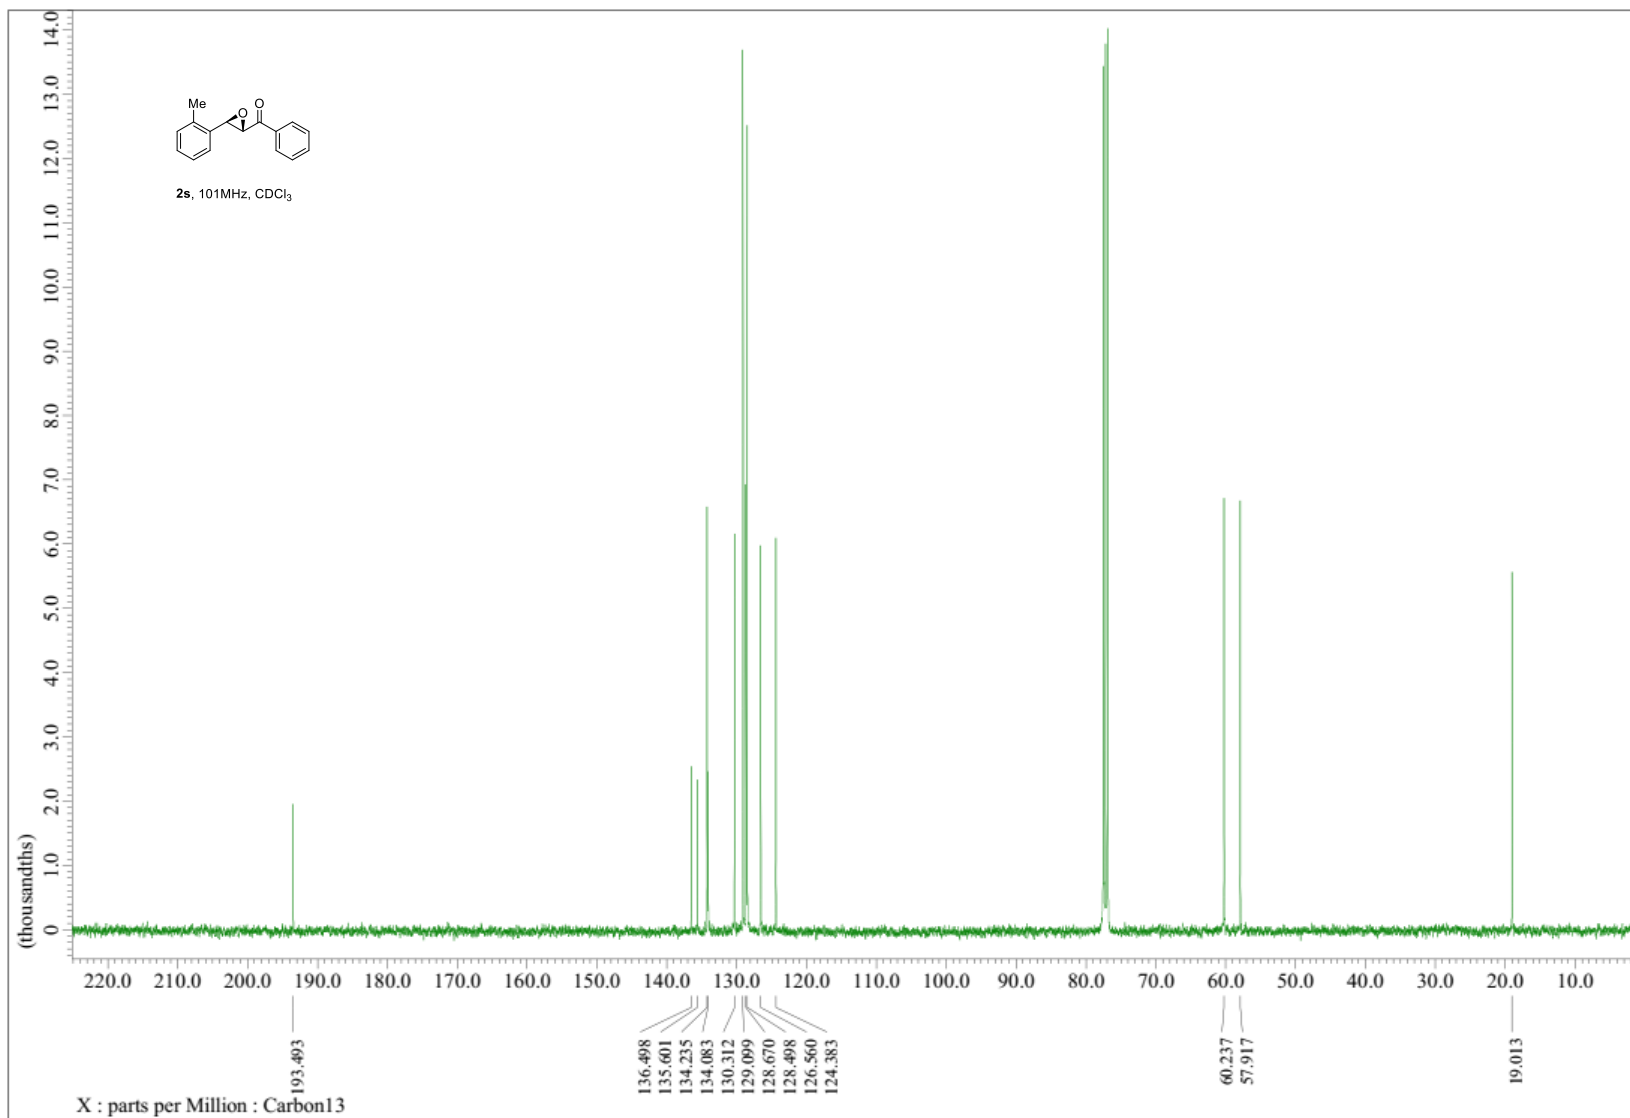

<sup>1</sup>H-NMR of compound **2t**

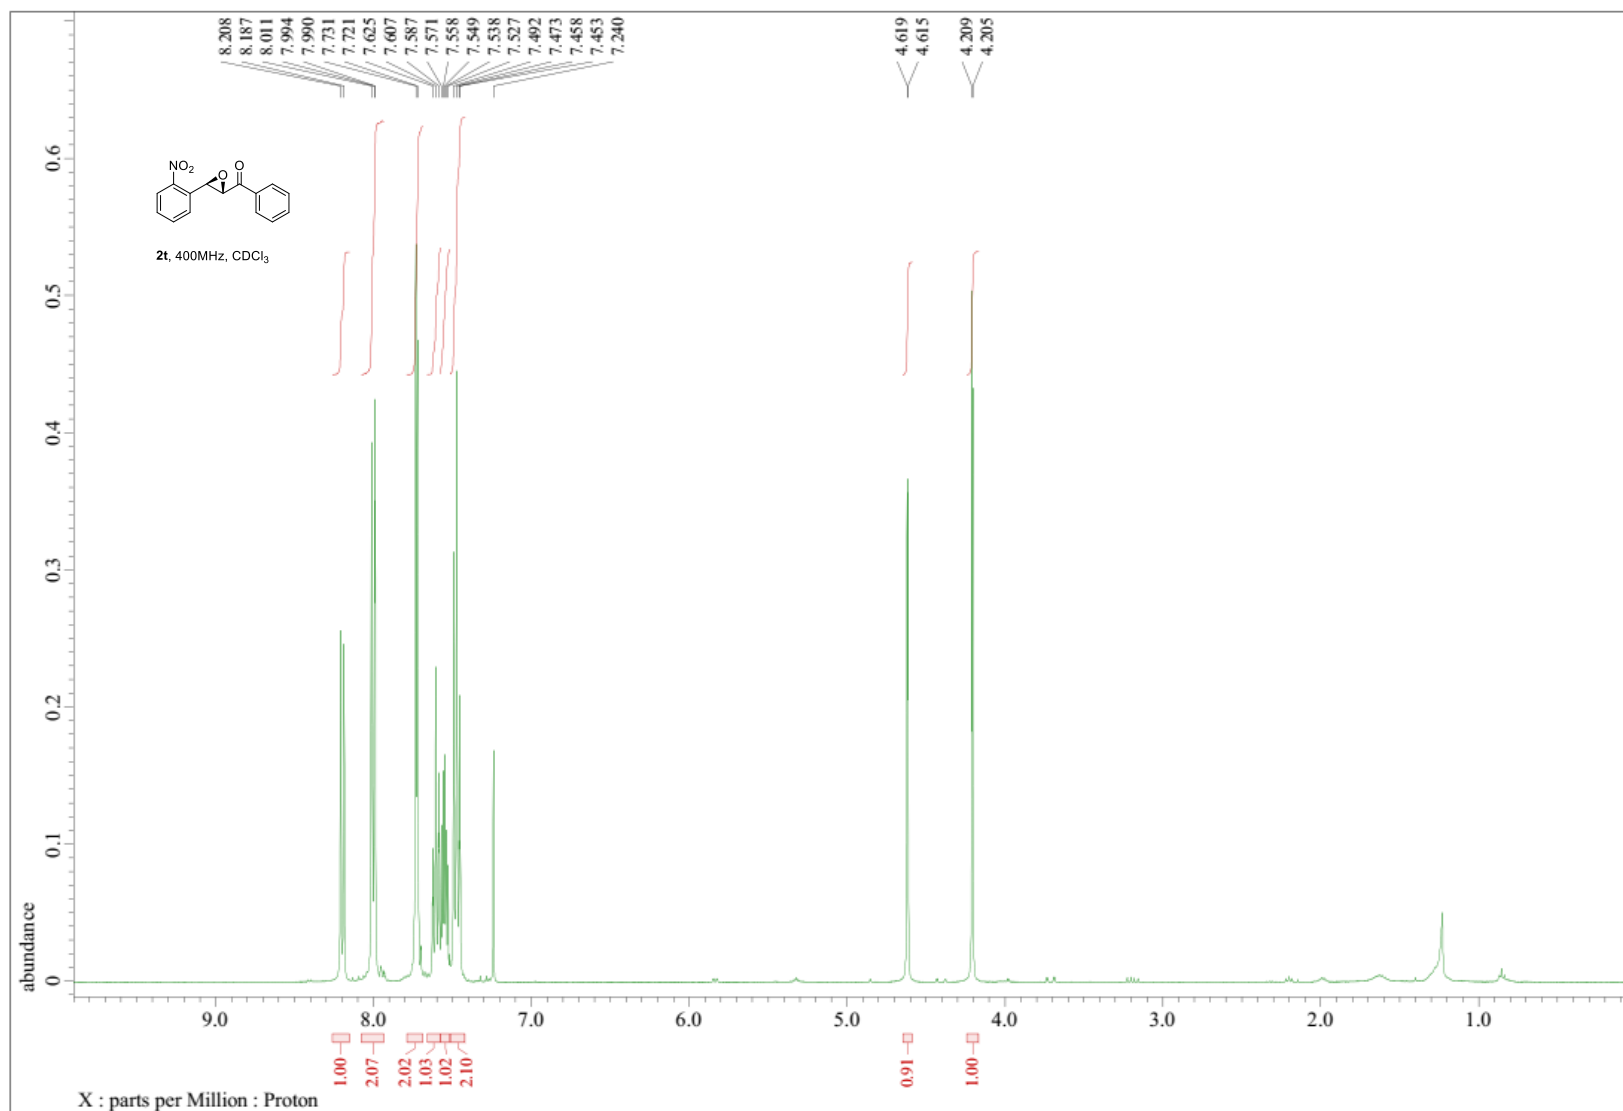

<sup>13</sup>C-NMR of compound **2t**

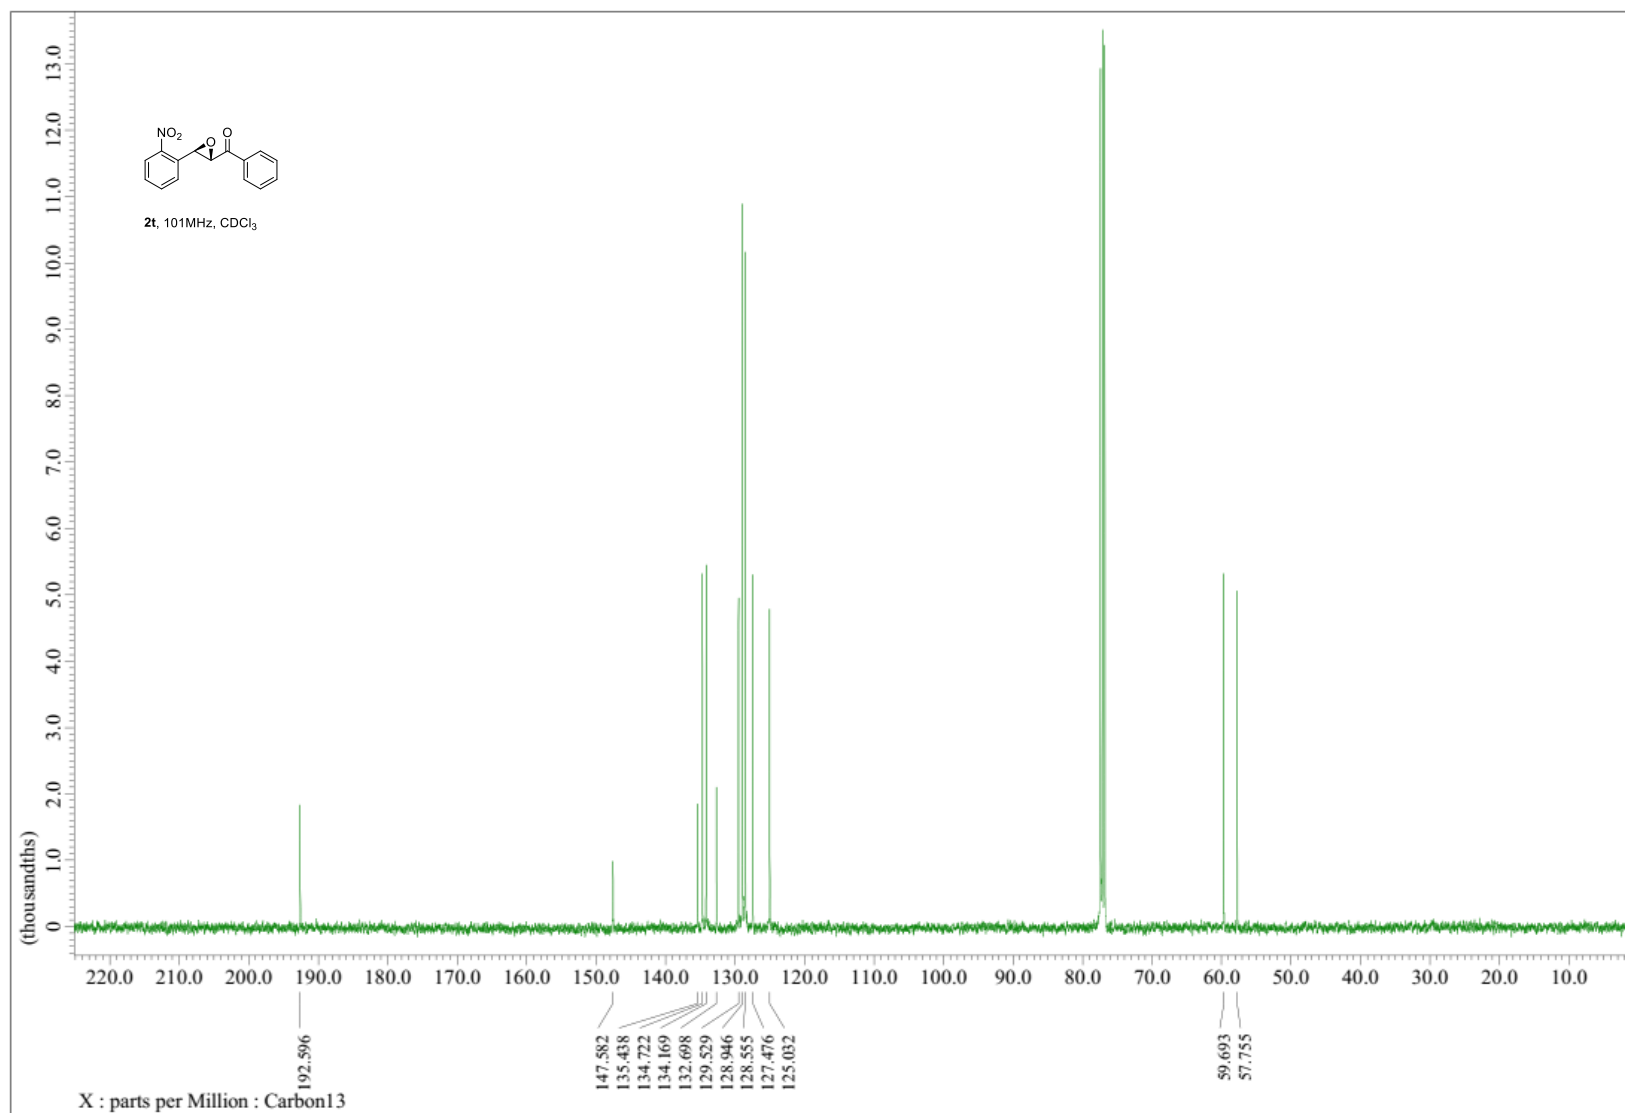

<sup>1</sup>H-NMR of compound **1v**

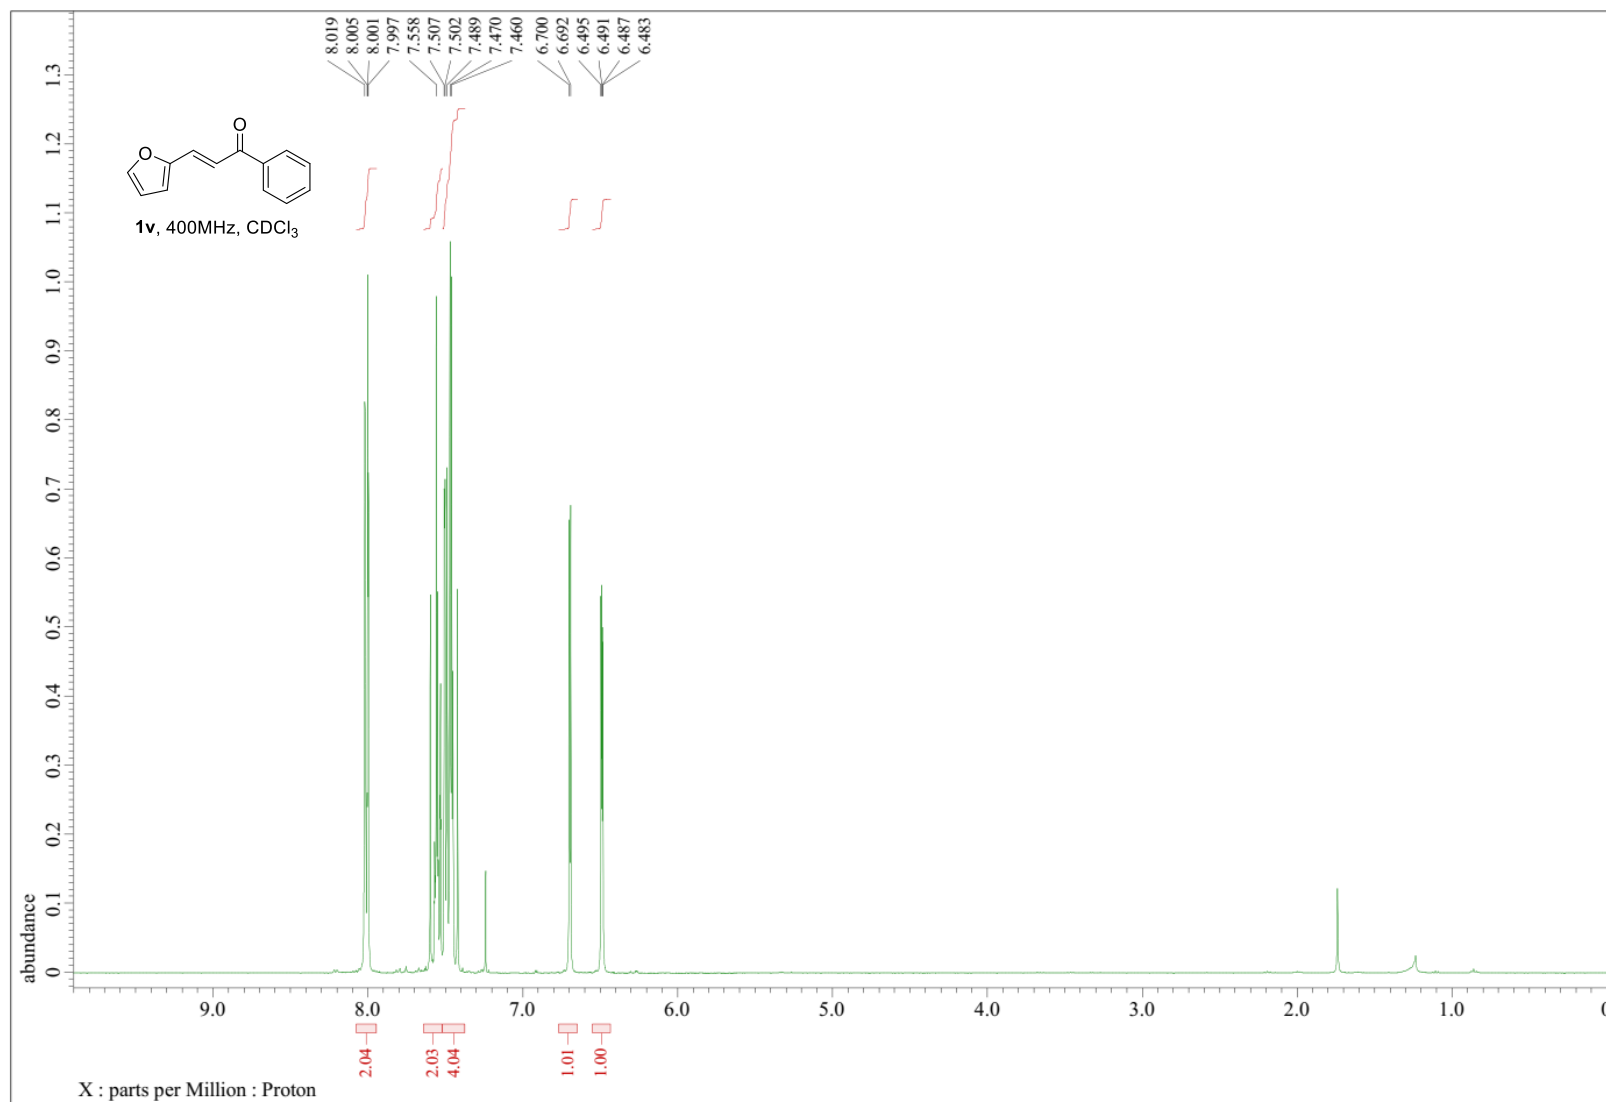

<sup>13</sup>C-NMR of compound **1v**

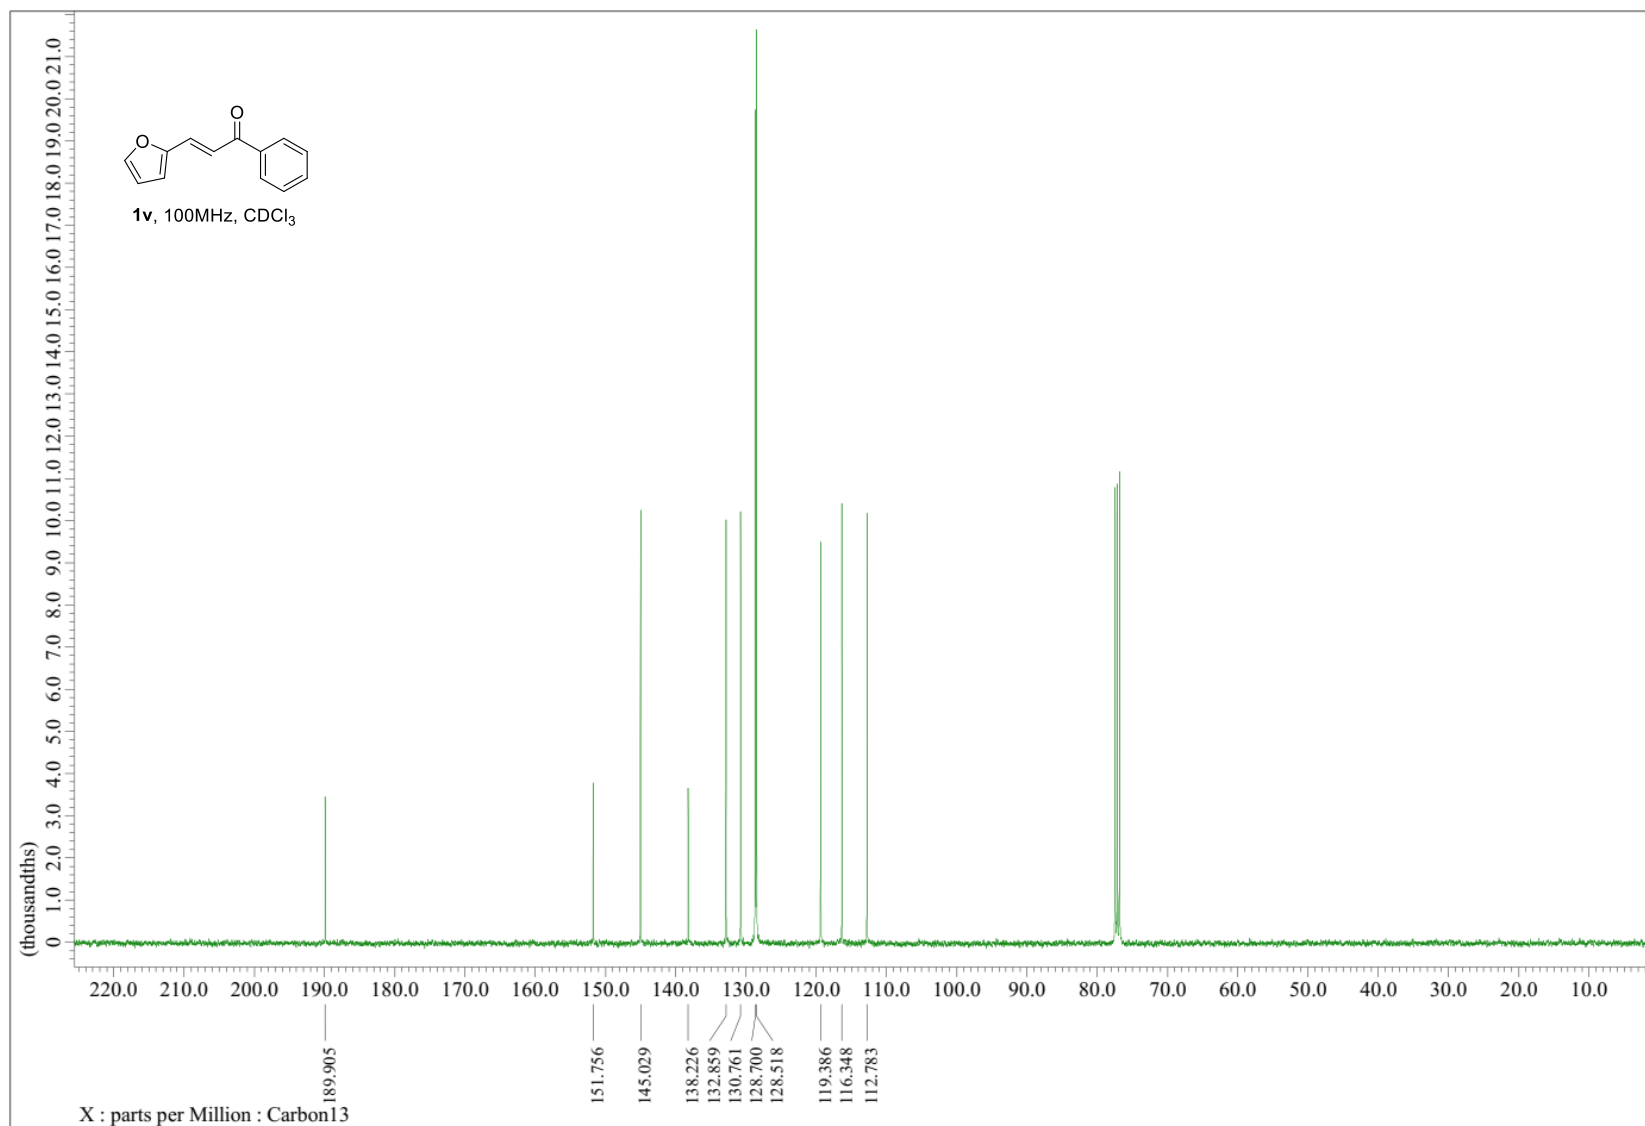



<sup>1</sup>H-NMR of compound **1w**

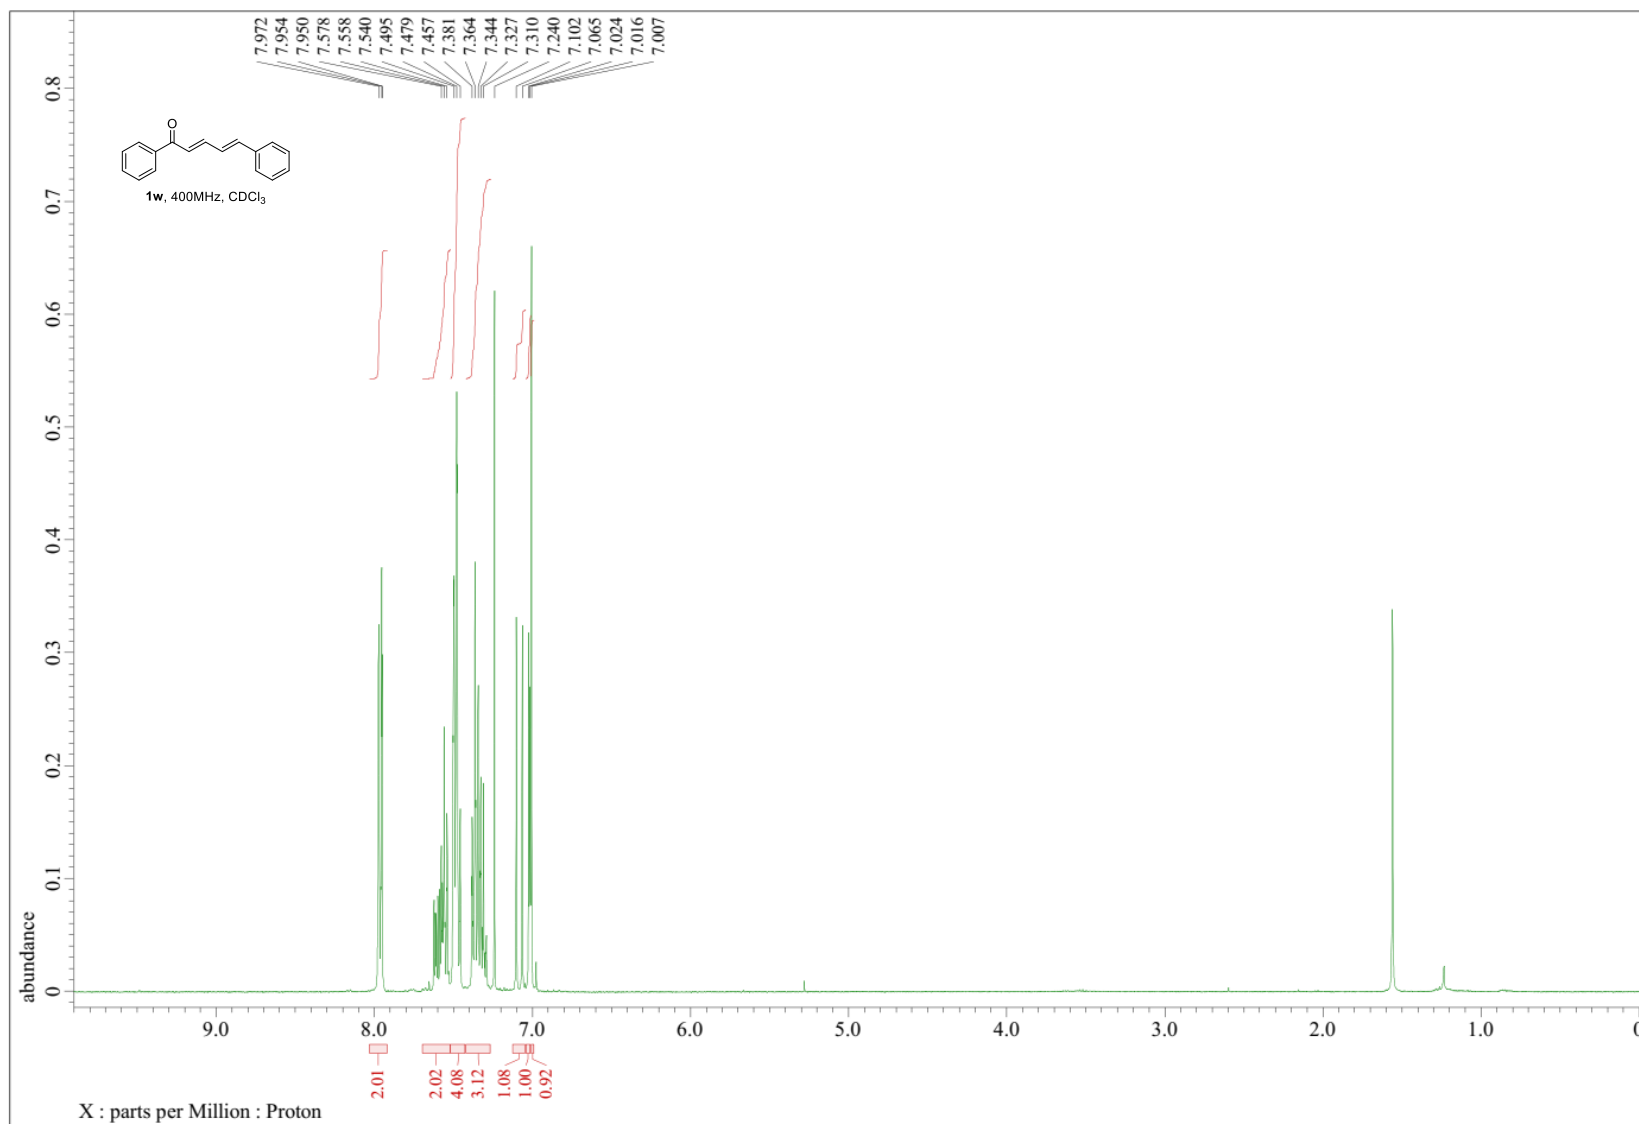

<sup>13</sup>C-NMR of compound **1w**

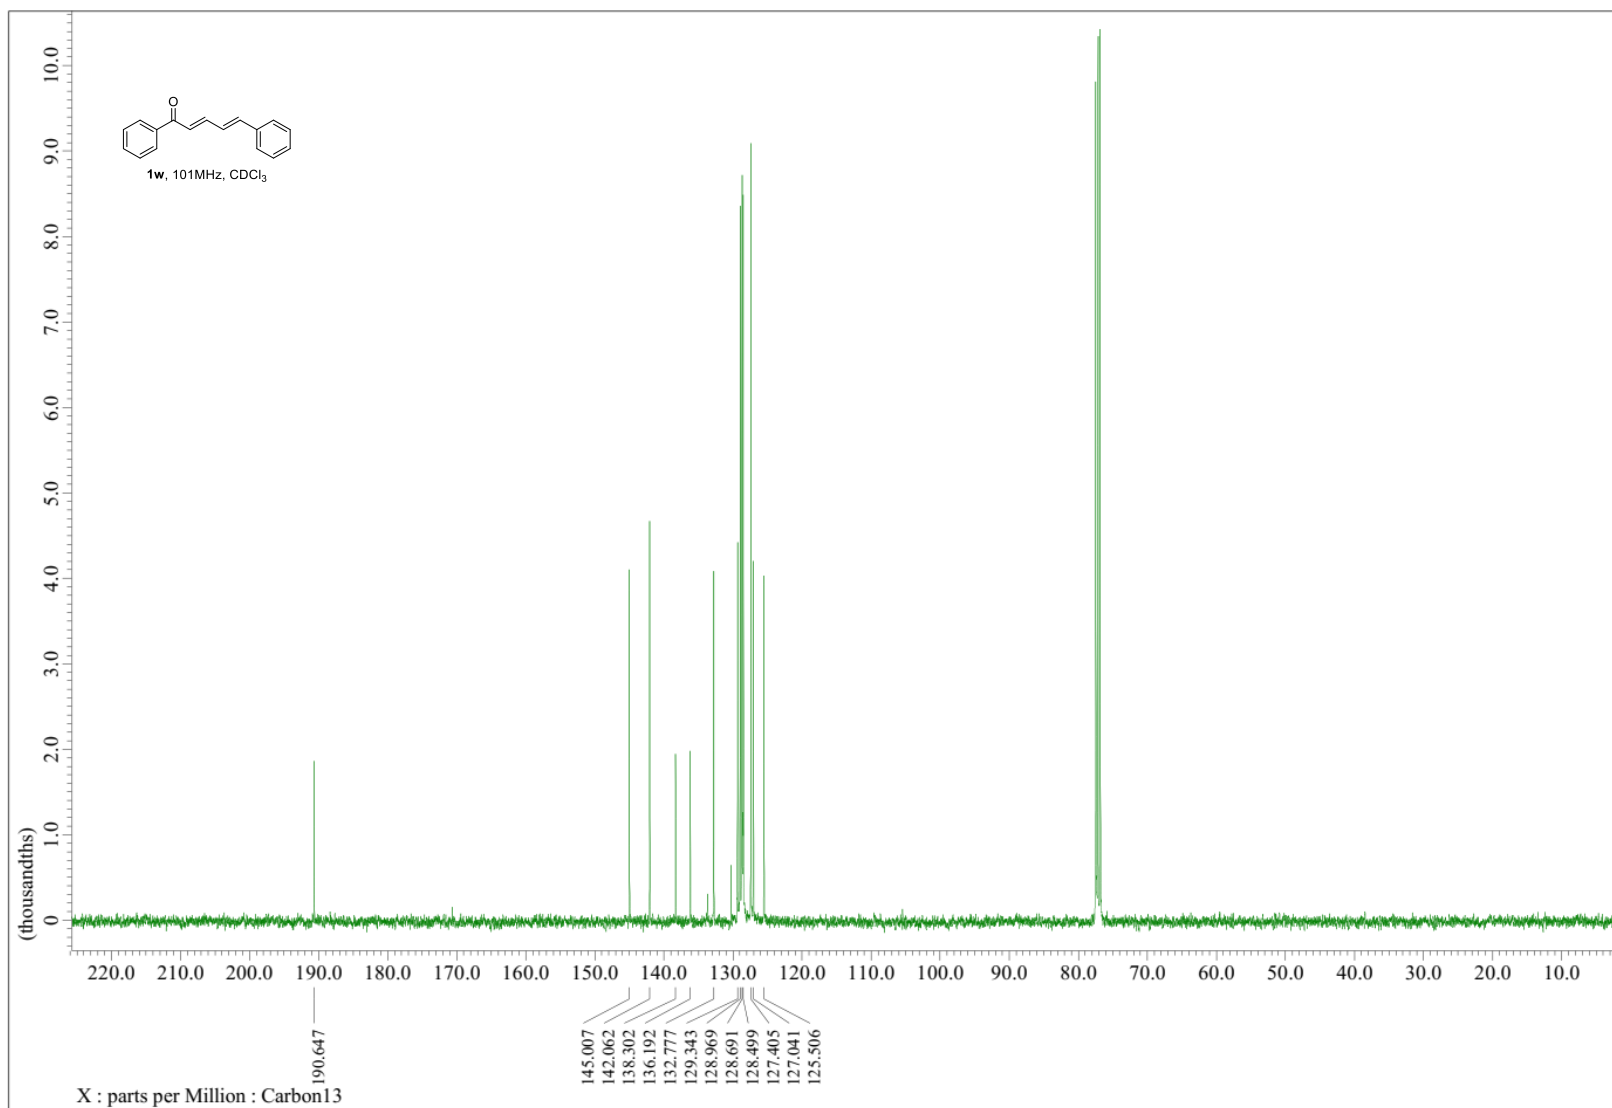

<sup>1</sup>H-NMR of compound **1x**

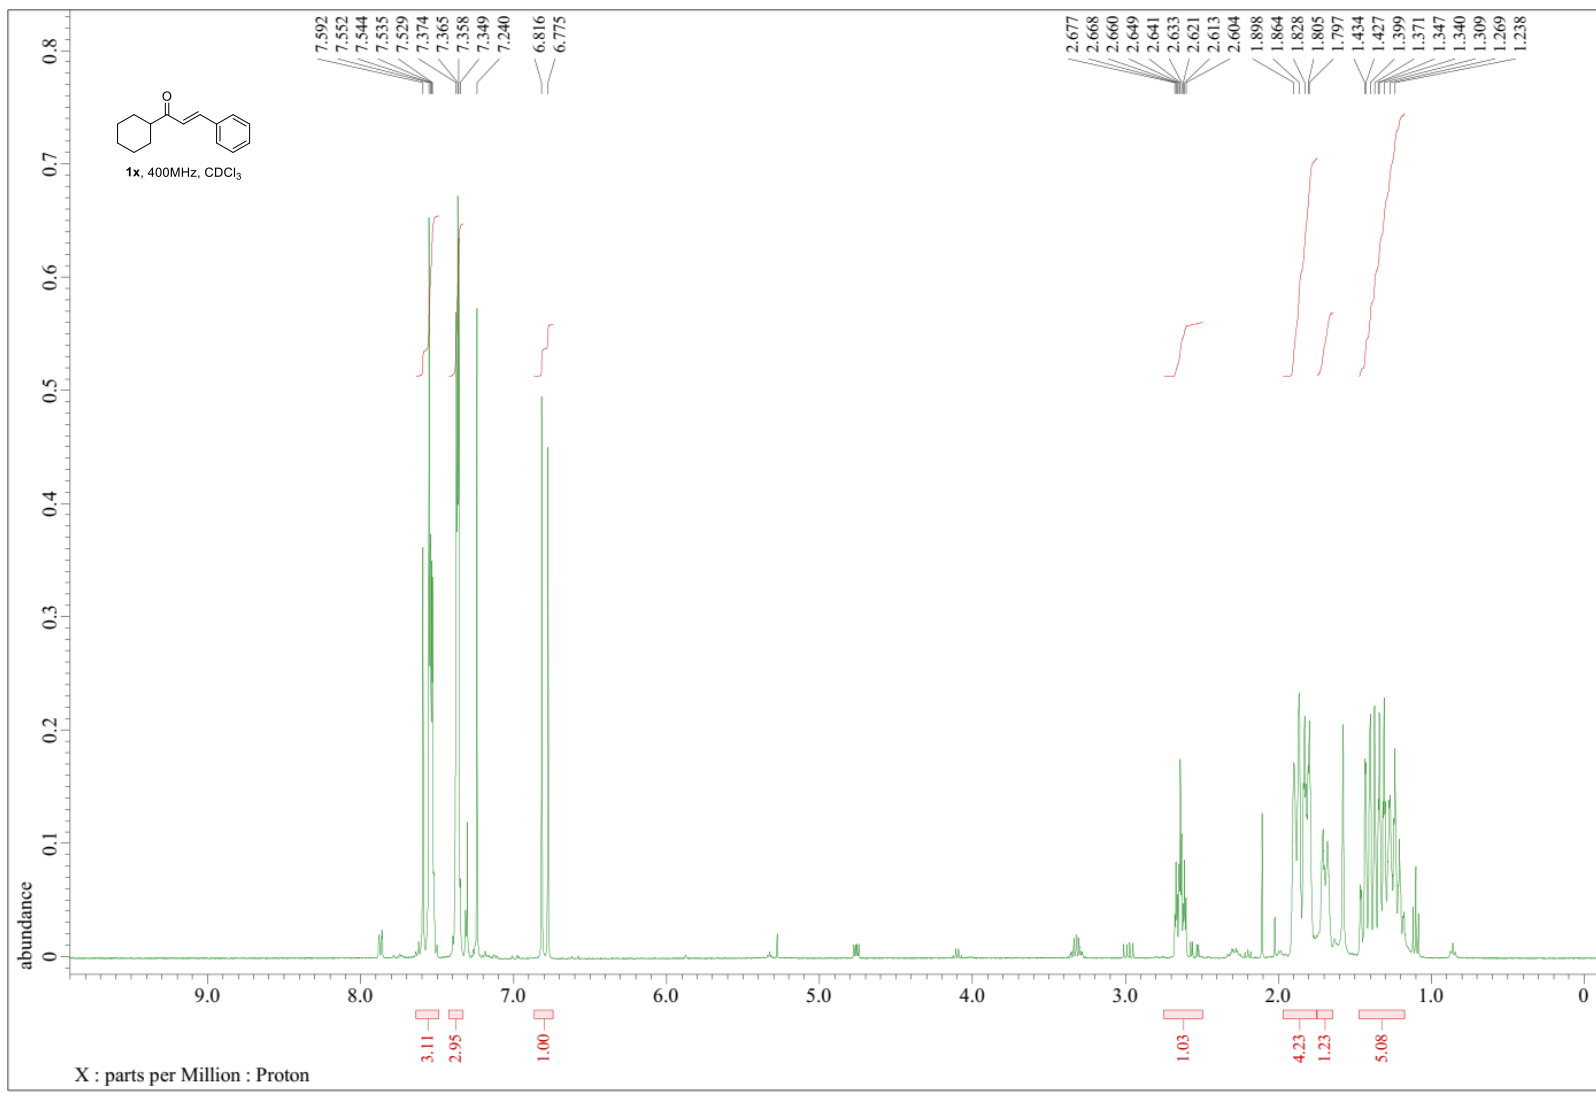

<sup>13</sup>C-NMR of compound **1x**

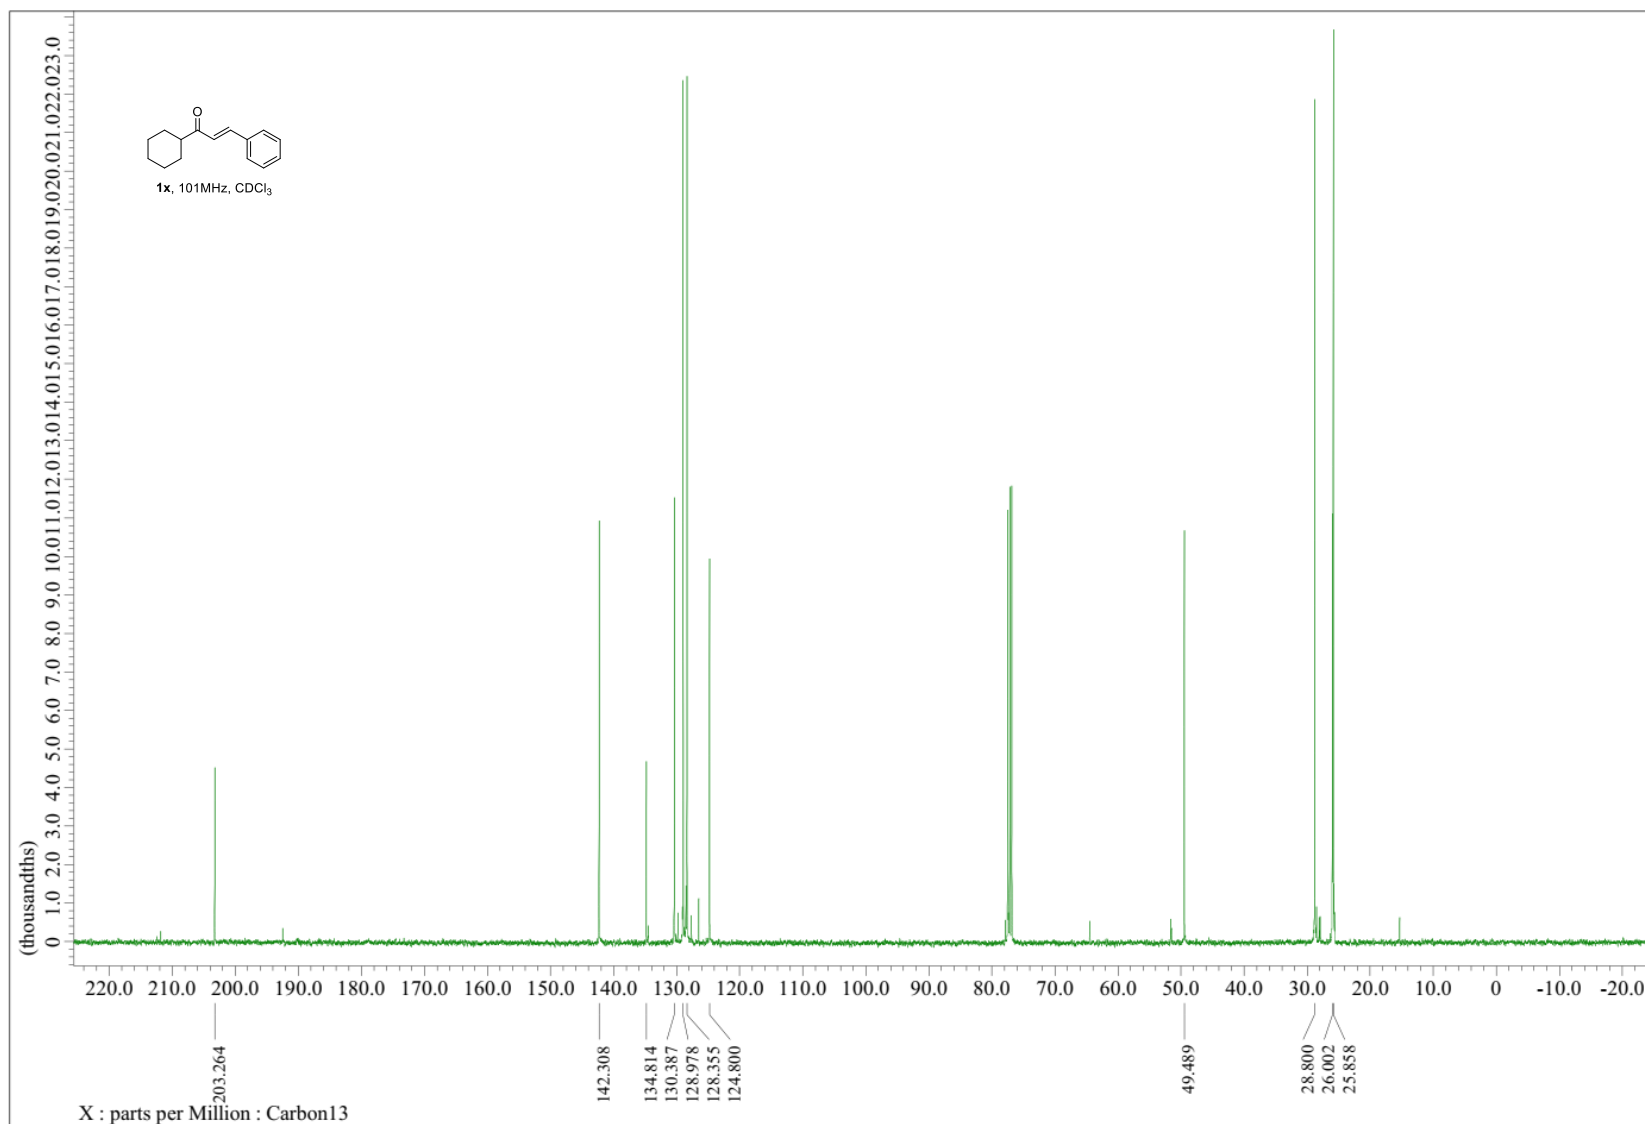

### Area Percent Report

Page 1 of 1 Data

File: C:\EZChrom Elite\Enterprise\Projects\Default\Data\GWLEE\lgw-2-27 (AD H Hx EtOH (90 10) 1flow 30min 250nm) 180612.dat  
 Acquired: 2018-06-12 오후 3:15:17  
 3:50:59  
 Printed: 2018-06-12 오후

Analyst: System  
 Sample ID: lgw-2-27

Vial: N/A

Injection Volume: 0

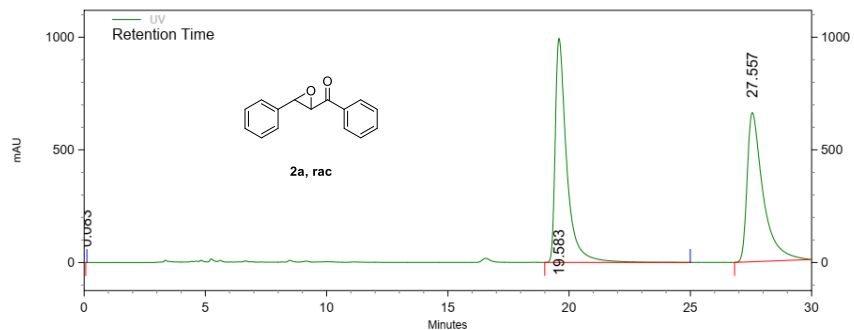

#### UV Results

| Name | Retention Time | Area      | Area Percent | Integration Codes |
|------|----------------|-----------|--------------|-------------------|
|      | 0.083          | 27        | 0.000        | BI                |
|      | 19.583         | 130735966 | 51.936       | BI                |
|      | 27.557         | 120988839 | 48.064       | IE                |

|        |  |           |         |  |
|--------|--|-----------|---------|--|
| Totals |  | 251724832 | 100.000 |  |
|--------|--|-----------|---------|--|

### Area Percent Report

Page 1 of 1 Data

File: C:\EZChrom Elite\Enterprise\Projects\Default\Data\GWLEE\lgw-7-21(AD H EtOH Hx 10 90 1flow 250nm 30 min) 20.11.05.dat  
 Acquired: 2020-11-05 오후 3:59:54  
 4:34:47  
 Printed: 2020-11-05 오후

Analyst: System

Sample ID: lgw-7-21(AD H EtOH Hx 10 90 1flow 250nm 30 min) 20.11.05

Injection Volume: 0

Vial: N/A

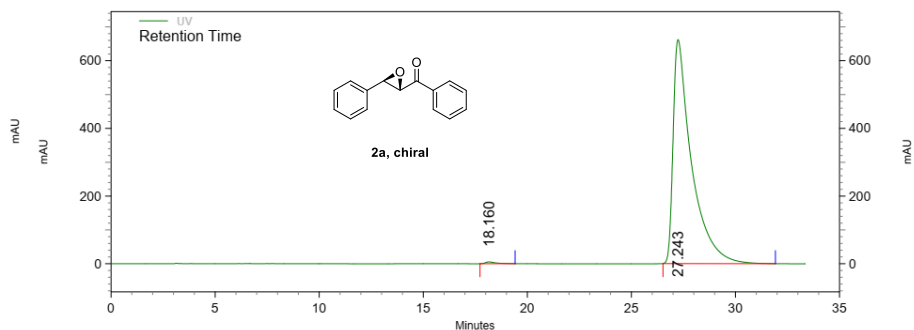

#### UV Results

| Name | Retention Time | Area      | Area Percent | Integration Codes |
|------|----------------|-----------|--------------|-------------------|
|      | 18.160         | 745117    | 0.457        | MM                |
|      | 27.243         | 162320906 | 99.543       | mm                |

|        |  |           |         |  |
|--------|--|-----------|---------|--|
| Totals |  | 163066023 | 100.000 |  |
|--------|--|-----------|---------|--|

## Area Percent Report

Page 1 of 1 Data

File: C:\EZChrom Elite\Enterprise\Projects\Default\Data\GWLEE\lgw-8-4 rac (AD H Hx iPrOH (90 10) 1flow 20min 254nm) 210304.dat  
 Acquired: 2021-03-04 오후 4:42:38  
 5:05:37  
 Printed: 2021-03-04 오후

Analyst: System

Sample ID: lgw-8-4 rac (AD H Hx iPrOH (90 10) 1flow 20min 254nm) 210304  
 Injection Volume: 0

Vial: N/A

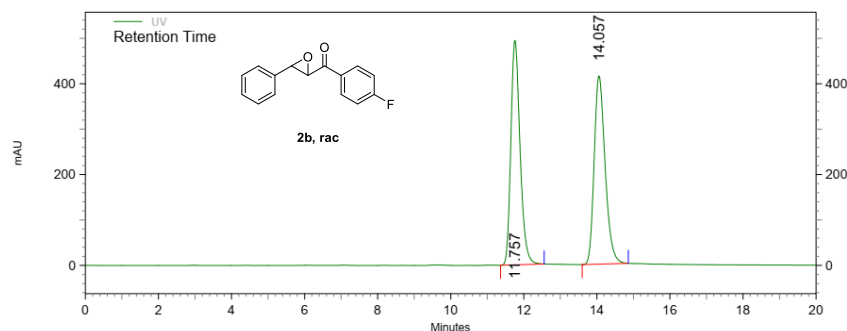

### UV Results

| Name   | Retention Time | Area     | Area Percent | Integration Codes |
|--------|----------------|----------|--------------|-------------------|
|        | 11.757         | 34609982 | 50.073       | MM                |
|        | 14.057         | 34508818 | 49.927       | MM                |
| Totals |                | 69118800 | 100.000      |                   |

## Area Percent Report

Page 1 of 1 Data

File: C:\EZChrom Elite\Enterprise\Projects\Default\Data\GWLEE\lgw-8-28-chiral (AD H Hx iPrOH (90 10) 1flow 20min 254nm) 210304.dat  
 Acquired: 2021-03-04 오후 5:07:43  
 5:28:09  
 Printed: 2021-03-04 오후

Analyst: System

Sample ID: lgw-8-28-chiral (AD H Hx iPrOH (90 10) 1flow 20min 254nm) 210304  
 Injection Volume: 0

Vial: N/A

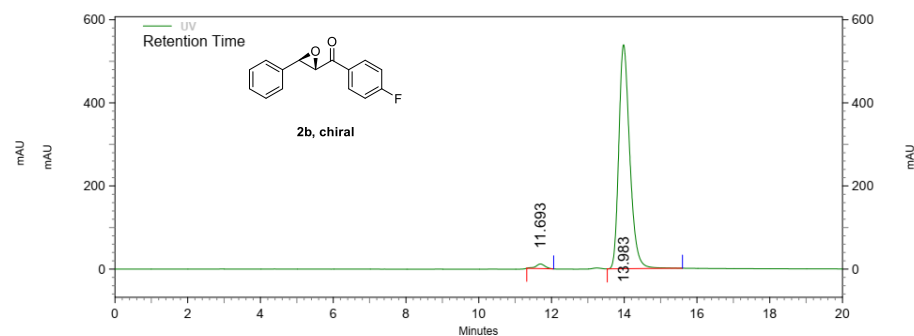

### UV Results

| Name   | Retention Time | Area     | Area Percent | Integration Codes |
|--------|----------------|----------|--------------|-------------------|
|        | 11.693         | 787698   | 1.718        | MM                |
|        | 13.983         | 45071422 | 98.282       | MM                |
| Totals |                | 45859120 | 100.000      |                   |

## Area Percent Report

Page 1 of 1 Data

File: C:\EZChrom Elite\Enterprise\Projects\Default\Data\GWLEE\lgw 10-53 (ID-H Hx iPrOH 90 10 1flow 30min 250nm) 211026.dat

Acquired: 2021-10-26 오후 7:18:38  
7:47:32

Printed: 2021-10-26 오후

Analyst: System

Sample ID: lgw 10-53 (ID-H Hx iPrOH 90 10 1flow 30min 250nm) 211026  
Injection Volume: 0

Vial: N/A

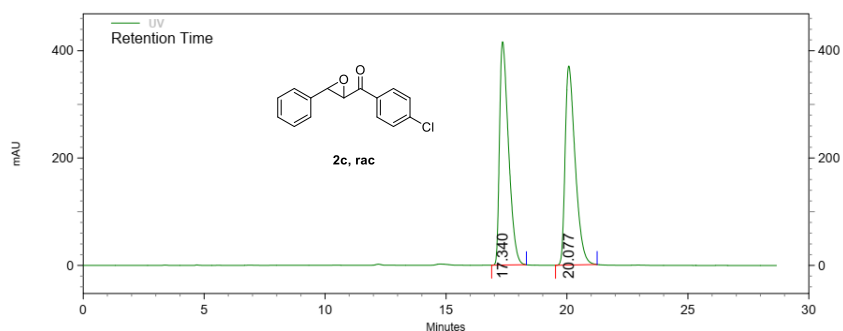

### UV Results

| Name | Retention Time | Area     | Area Percent | Integration Codes |
|------|----------------|----------|--------------|-------------------|
|      | 17.340         | 43065326 | 50.105       | MM                |
|      | 20.077         | 42884567 | 49.895       | MM                |

|        |  |          |         |  |
|--------|--|----------|---------|--|
| Totals |  | 85949893 | 100.000 |  |
|--------|--|----------|---------|--|

## Area Percent Report

Page 1 of 1 Data

File: C:\EZChrom Elite\Enterprise\Projects\Default\Data\GWLEE\lgw 10-61 c(ID-H Hx iPrOH 90 10 1flow 30min 250nm) 211026.dat

Acquired: 2021-10-26 오후 8:21:11  
8:44:12

Printed: 2021-10-26 오후

Analyst: System

Sample ID: lgw 10-61 c(ID-H Hx iPrOH 90 10 1flow 30min 250nm) 211026  
Injection Volume: 0

Vial: N/A

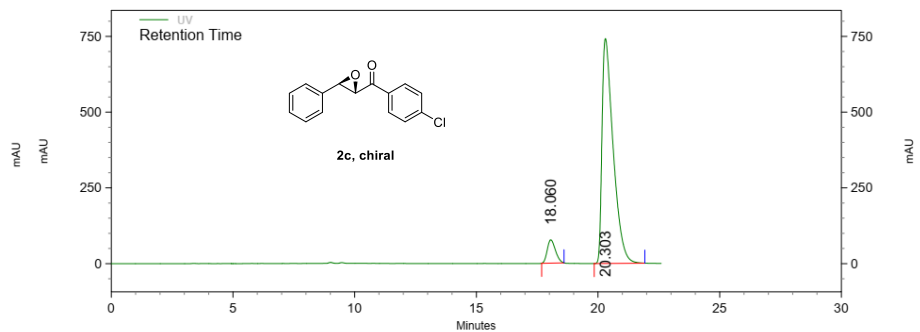

### UV Results

| Name | Retention Time | Area     | Area Percent | Integration Codes |
|------|----------------|----------|--------------|-------------------|
|      | 18.060         | 7143654  | 7.041        | MM                |
|      | 20.303         | 94314885 | 92.959       | MM                |

|        |  |           |         |  |
|--------|--|-----------|---------|--|
| Totals |  | 101458539 | 100.000 |  |
|--------|--|-----------|---------|--|

## Area Percent Report

Page 1 of 1 Data

File: C:\EZChrom Elite\Enterprise\Projects\Default\Data\GWLEE\lgw 10-52 (ID-H Hx iPrOH 90 10 1flow 30min 250nm) 211026.dat

Acquired: 2021-10-26 오후 6:50:50  
7:17:21

Printed: 2021-10-26 오후

Analyst: System

Sample ID: lgw 10-52 (ID-H Hx iPrOH 90 10 1flow 30min 250nm) 211026

Injection Volume: 0

Vial: N/A

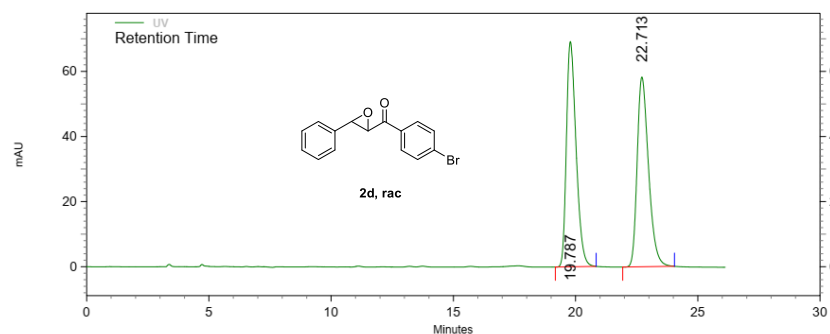

### UV Results

| Name | Retention Time | Area    | Area Percent | Integration Codes |
|------|----------------|---------|--------------|-------------------|
|      | 19.787         | 7593575 | 50.190       | MM                |
|      | 22.713         | 7536218 | 49.810       | MM                |

|        |  |          |         |  |
|--------|--|----------|---------|--|
| Totals |  | 15129793 | 100.000 |  |
|--------|--|----------|---------|--|

## Area Percent Report

Page 1 of 1 Data

File: C:\EZChrom Elite\Enterprise\Projects\Default\Data\GWLEE\lgw 10-60 c(ID-H Hx iPrOH 90 10 1flow 30min 250nm) 211026.dat

Acquired: 2021-10-26 오후 7:49:42  
8:20:12

Printed: 2021-10-26 오후

Analyst: System

Sample ID: lgw 10-60 c(ID-H Hx iPrOH 90 10 1flow 30min 250nm) 211026

Injection Volume: 0

Vial: N/A

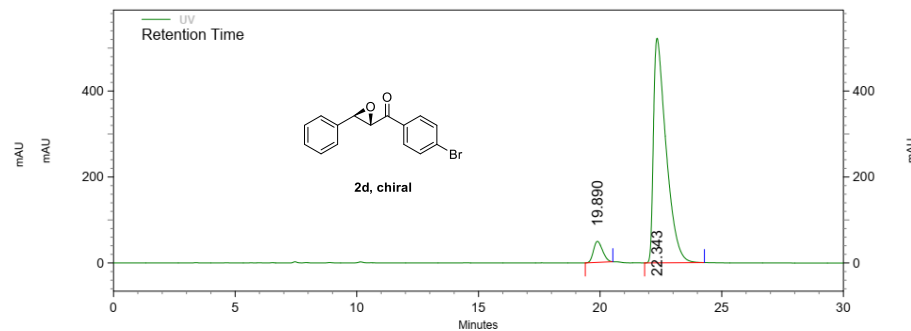

### UV Results

| Name | Retention Time | Area     | Area Percent | Integration Codes |
|------|----------------|----------|--------------|-------------------|
|      | 19.890         | 5099848  | 6.322        | MM                |
|      | 22.343         | 75574213 | 93.678       | MM                |

|        |  |          |         |  |
|--------|--|----------|---------|--|
| Totals |  | 80674061 | 100.000 |  |
|--------|--|----------|---------|--|



## Area Percent Report

Page 1 of 1 Data

File: C:\EZChrom Elite\Enterprise\Projects\Default\Data\GWLEE\lgw-7-90 racemic(AD H Hx iPrOH (95 5) 1flow 30min 254nm) 210806.dat  
 Acquired: 2021-08-06 오후 12:38:25  
 Printed: 2021-08-06 오후 1:19:57

Analyst: System

Sample ID: lgw-7-90 racemic(AD H Hx iPrOH (95 5) 1flow 30min 254nm) 210806  
 N/A Injection Volume: 0

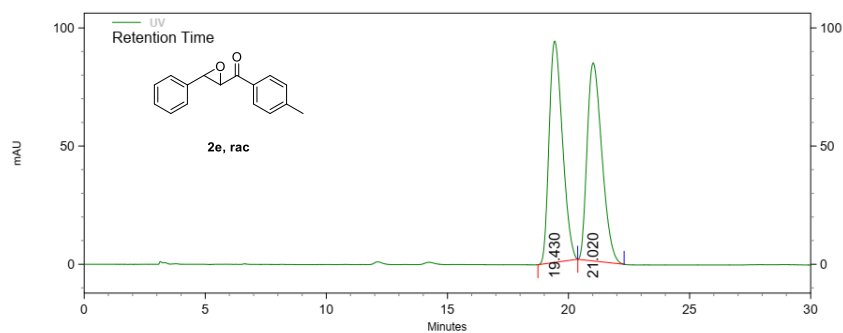

### UV Results

| Name | Retention Time | Area     | Area Percent | Integration Codes |
|------|----------------|----------|--------------|-------------------|
|      | 19.430         | 14308839 | 50.200       | MM                |
|      | 21.020         | 14194584 | 49.800       | MM                |

|        |  |          |         |  |
|--------|--|----------|---------|--|
| Totals |  | 28503423 | 100.000 |  |
|--------|--|----------|---------|--|

## Area Percent Report

Page 1 of 1 Data

File: C:\EZChrom Elite\Enterprise\Projects\Default\Data\GWLEE\lgw-9-95 chiral(AD H Hx iPrOH (95 5) 1flow 30min 254nm) 210806.dat  
 Acquired: 2021-08-06 오전 11:59:52  
 Printed: 2021-08-06 오후 12:36:15

Analyst: System

Sample ID: lgw-9-95 chiral(AD H Hx iPrOH (95 5) 1flow 30min 254nm) 210806  
 N/A Injection Volume: 0

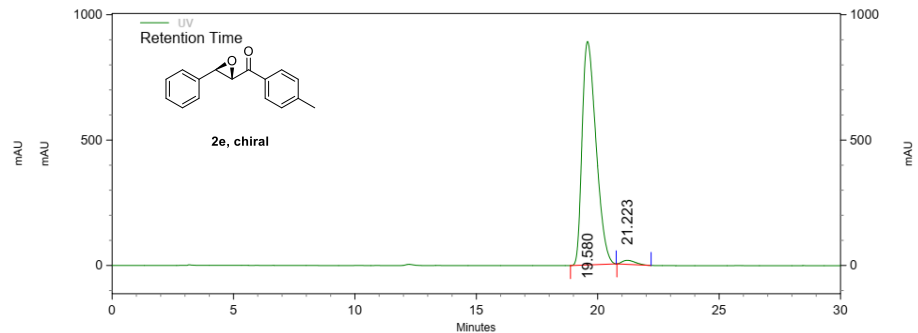

### UV Results

| Name | Retention Time | Area      | Area Percent | Integration Codes |
|------|----------------|-----------|--------------|-------------------|
|      | 19.580         | 141875019 | 98.305       | MM                |
|      | 21.223         | 2446063   | 1.695        | MM                |

|        |  |           |         |  |
|--------|--|-----------|---------|--|
| Totals |  | 144321082 | 100.000 |  |
|--------|--|-----------|---------|--|

## Area Percent Report

Page 1 of 1 Data

File: C:\EZChrom Elite\Enterprise\Projects\Default\Data\GWLEE\lgw-7-100 rac(AD H iPrOH Hx 10 90 1flow 254nm 30 min) 210517.dat  
 Acquired: 2021-05-17 오후 4:17:16  
 4:48:31

Printed: 2021-05-17 오후

Analyst: System

Sample ID: lgw-7-100 rac(AD H iPrOH Hx 10 90 1flow 254nm 30 min) 210517  
 Injection Volume: 0

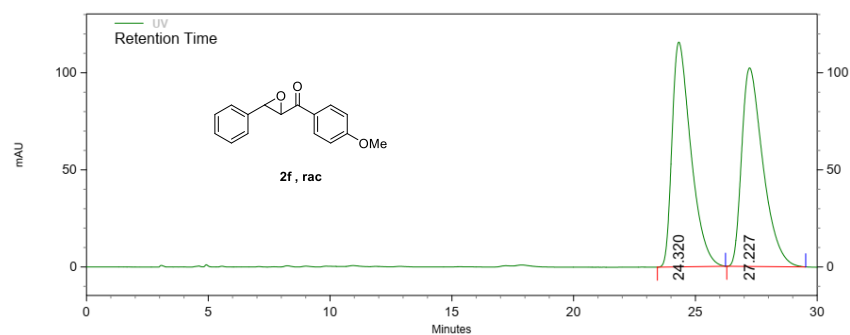

### UV Results

| Name | Retention Time | Area     | Area Percent | Integration Codes |
|------|----------------|----------|--------------|-------------------|
|      | 24.320         | 24927629 | 50.022       | MM                |
|      | 27.227         | 24905572 | 49.978       | MM                |

|        |  |          |         |  |
|--------|--|----------|---------|--|
| Totals |  | 49833201 | 100.000 |  |
|--------|--|----------|---------|--|

## Area Percent Report

Page 1 of 1 Data

File: C:\EZChrom Elite\Enterprise\Projects\Default\Data\GWLEE\lgw-9-61 chiral (AD H iPrOH Hx 10 90 1flow 254nm 30 min) 210708.dat  
 Acquired: 2021-07-08 오후 3:25:39  
 4:01:55

Printed: 2021-07-08 오후

Analyst: System

Vial: N/A Sample ID: lgw-9-61 chiral (AD H iPrOH Hx 10 90 1flow 254nm 30 min) 210708  
 Injection Volume: 0

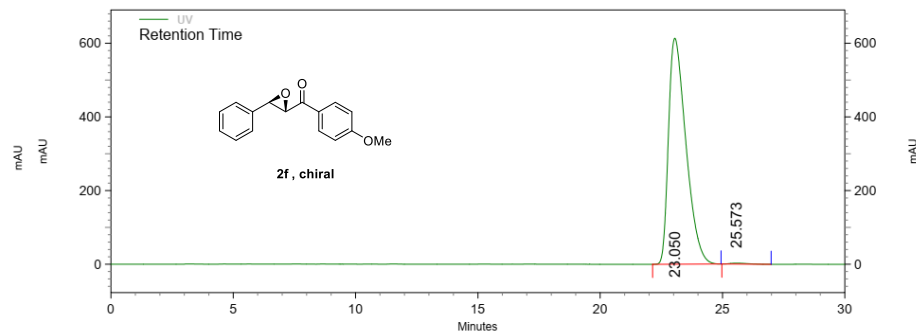

### UV Results

| Name | Retention Time | Area      | Area Percent | Integration Codes |
|------|----------------|-----------|--------------|-------------------|
|      | 23.050         | 121635327 | 99.573       | MM                |
|      | 25.573         | 521899    | 0.427        | MM                |

|        |  |           |         |  |
|--------|--|-----------|---------|--|
| Totals |  | 122157226 | 100.000 |  |
|--------|--|-----------|---------|--|

## Area Percent Report

Page 1 of 1 Data

File: C:\EZChrom Elite\Enterprise\Projects\Default\Data\GWLEE\lgw 7-99 rac (OD-H Hx iPrOH 90 10 1flow 30min 250nm) 211026.dat  
 Acquired: 2021-10-26 오후 11:36:22  
 11:56:13

Printed: 2021-10-26 오후

Analyst: System

Sample ID: lgw 7-99 rac (OD-H Hx iPrOH 90 10 1flow 30min 250nm) 211026  
 Injection Volume: 0

Vial: N/A

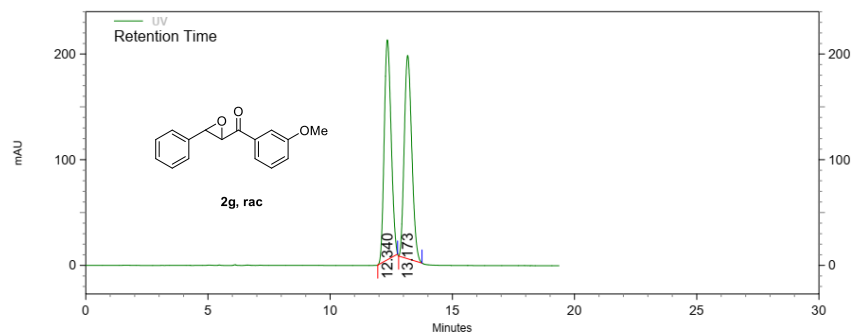

### UV Results

| Name | Retention Time | Area     | Area Percent | Integration Codes |
|------|----------------|----------|--------------|-------------------|
|      | 12.340         | 16359410 | 49.754       | MM                |
|      | 13.173         | 16521492 | 50.246       | MM                |

|        |  |          |         |  |
|--------|--|----------|---------|--|
| Totals |  | 32880902 | 100.000 |  |
|--------|--|----------|---------|--|

## Area Percent Report

Page 1 of 1 Data

File: C:\EZChrom Elite\Enterprise\Projects\Default\Data\GWLEE\lgw 10- 2\_3OMe (OD-H Hx iPrOH 90 10 1flow 30min 250nm) 211026.dat  
 Acquired: 2021-10-27 오전 12:15:14  
 12:30:29

Printed: 2021-10-27 오전

Analyst: System

Sample ID: lgw 10- 2\_3OMe (OD-H Hx iPrOH 90 10 1flow 30min 250nm) 211026  
 Injection Volume: 0

Vial:

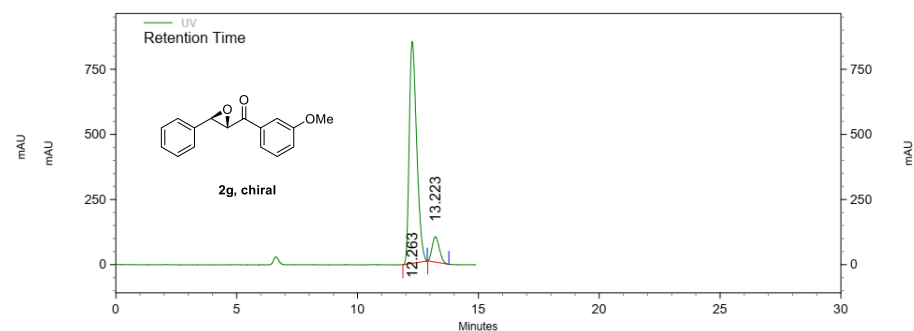

### UV Results

| Name | Retention Time | Area     | Area Percent | Integration Codes |
|------|----------------|----------|--------------|-------------------|
|      | 12.263         | 73056759 | 90.048       | MM                |
|      | 13.223         | 8074575  | 9.952        | MM                |

|        |  |          |         |  |
|--------|--|----------|---------|--|
| Totals |  | 81131334 | 100.000 |  |
|--------|--|----------|---------|--|

### Area Percent Report

Page 1 of 1 Data

File: C:\EZChrom Elite\Enterprise\Projects\Default\Data\GWLEE\lgw-8-2 rac-4 (AD H Hx iPrOH (90 10) 1flow 60min 254nm) 210304.dat  
 Acquired: 2021-03-04 오후 3:55:05  
 4:38:32  
 Printed: 2021-03-04 오후

Analyst: System

Sample ID: lgw-8-2 rac-4 (AD H Hx iPrOH (90 10) 1flow 60min 254nm) 210304  
 N/A Injection Volume: 0

Vial:

### Area Percent Report

Page 1 of 1 Data

File: C:\EZChrom Elite\Enterprise\Projects\Default\Data\GWLEE\lgw-8-27 chiral(AD H Hx iPrOH (90 10) 1flow 20min 254nm) 210304.dat  
 Acquired: 2021-03-04 오후 4:17:10  
 4:37:37  
 Printed: 2021-03-04 오후

Analyst: System

Sample ID: lgw-8-27 chiral (AD H Hx iPrOH (90 10) 1flow 20min 254nm) 210304  
 N/A Injection Volume: 0

Vial:

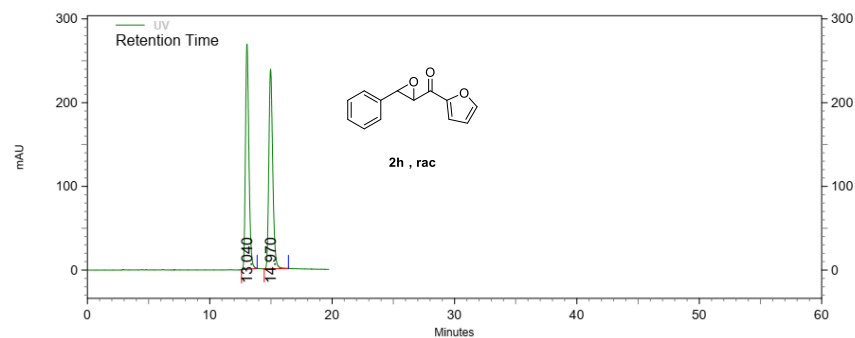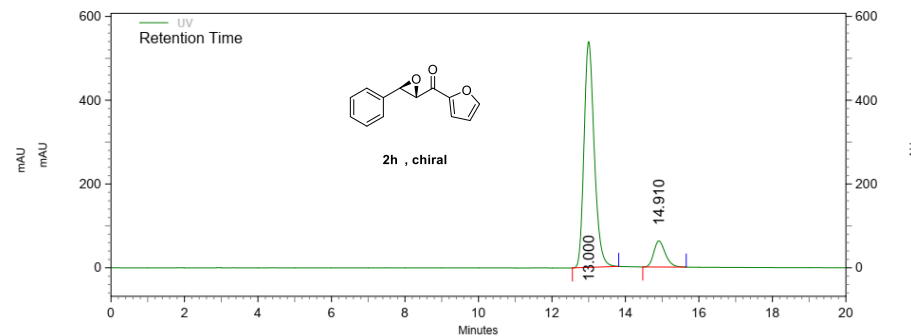

#### UV Results

| Name | Retention Time | Area     | Area Percent | Integration Codes |
|------|----------------|----------|--------------|-------------------|
|      | 13.040         | 21013534 | 49.851       | MM                |
|      | 14.970         | 21139566 | 50.149       | MM                |

|        |  |          |         |  |
|--------|--|----------|---------|--|
| Totals |  | 42153100 | 100.000 |  |
|--------|--|----------|---------|--|

#### UV Results

| Name | Retention Time | Area     | Area Percent | Integration Codes |
|------|----------------|----------|--------------|-------------------|
|      | 13.000         | 41708889 | 88.512       | MM                |
|      | 14.910         | 5413178  | 11.488       | MM                |

|        |  |          |         |  |
|--------|--|----------|---------|--|
| Totals |  | 47122067 | 100.000 |  |
|--------|--|----------|---------|--|

## Area Percent Report

Page 1 of 1 Data

File: C:\EZChrom Elite\Enterprise\Projects\Default\Data\GWLEE\lgw-8-1 rac (OD H Hx iPrOH (90 10) 1flow 20min 254nm) 210216.dat

Acquired: 2021-02-16 오후 5:00:01  
5:21:21

Printed: 2021-02-16 오후

Analyst: System

Sample ID: lgw-8-1 rac (OD H Hx iPrOH (90 10) 1flow 20min 254nm) 210216  
Injection Volume: 0

Vial: N/A

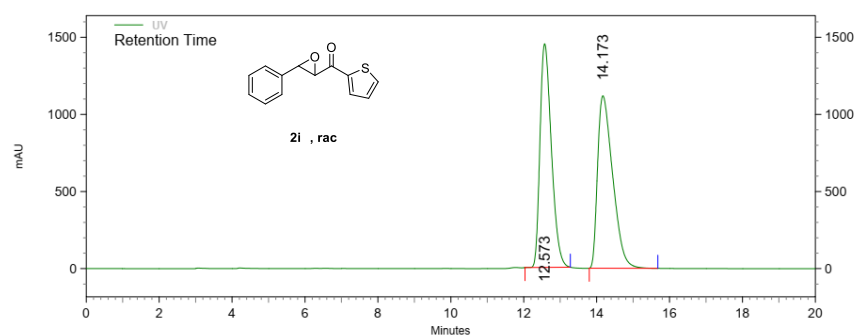

### UV Results

| Name | Retention Time | Area      | Area Percent | Integration Codes |
|------|----------------|-----------|--------------|-------------------|
|      | 12.573         | 125852655 | 49.452       | MM                |
|      | 14.173         | 128642460 | 50.548       | MM                |

|        |  |           |         |  |
|--------|--|-----------|---------|--|
| Totals |  | 254495115 | 100.000 |  |
|--------|--|-----------|---------|--|

## Area Percent Report

Page 1 of 1 Data

File: C:\EZChrom Elite\Enterprise\Projects\Default\Data\GWLEE\lgw-8-12 (OD H Hx iPrOH (90 10) 1flow 20min 254nm) 210216.dat

Acquired: 2021-02-16 오후 5:22:42  
5:45:11

Printed: 2021-02-16 오후

Analyst: System

Sample ID: lgw-8-12 (OD H Hx iPrOH (90 10) 1flow 20min 254nm) 210216  
Injection Volume: 0

Vial: N/A

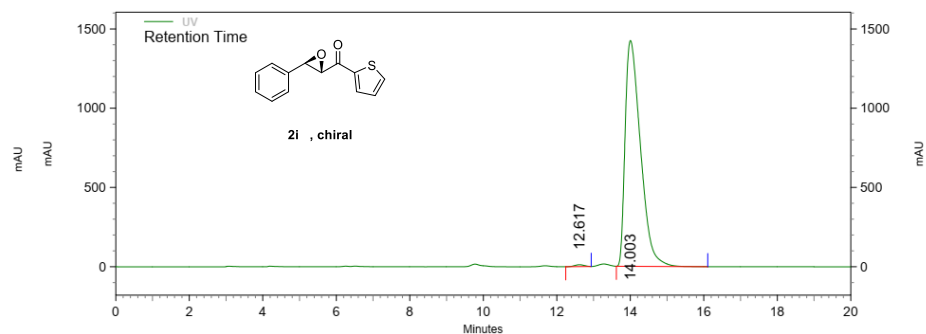

### UV Results

| Name | Retention Time | Area      | Area Percent | Integration Codes |
|------|----------------|-----------|--------------|-------------------|
|      | 12.617         | 841996    | 0.508        | mm                |
|      | 14.003         | 165052156 | 99.492       | mm                |

|        |  |           |         |  |
|--------|--|-----------|---------|--|
| Totals |  | 165894152 | 100.000 |  |
|--------|--|-----------|---------|--|

## Area Percent Report

Page 1 of 1 Data

File: C:\EZChrom Elite\Enterprise\Projects\Default\Data\GWLEE\lgw-8-5 rac (AD H Hx iPrOH (90 10) 1flow 30min 254nm) 210310.dat  
 Acquired: 2021-03-10 오후 3:06:30  
 3:36:59

Printed: 2021-03-10 오후

Analyst: System

Sample ID: lgw-8-5 rac (AD H Hx iPrOH (90 10) 1flow 30min 254nm) 210310  
 Injection Volume: 0

Vial: N/A

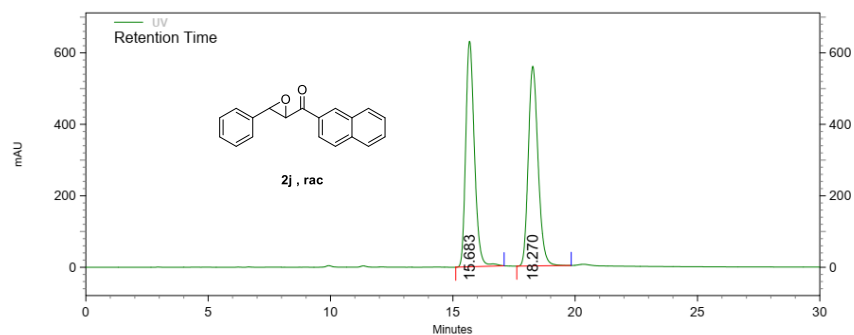

### UV Results

| Name | Retention Time | Area     | Area Percent | Integration Codes |
|------|----------------|----------|--------------|-------------------|
|      | 15.683         | 62337736 | 50.032       | MM                |
|      | 18.270         | 62258471 | 49.968       | MM                |

|        |  |           |         |  |
|--------|--|-----------|---------|--|
| Totals |  | 124596207 | 100.000 |  |
|--------|--|-----------|---------|--|

## Area Percent Report

Page 1 of 1 Data

File: C:\EZChrom Elite\Enterprise\Projects\Default\Data\GWLEE\lgw-8-22 chiral (AD H Hx iPrOH (90 10) 1flow 30min 254nm) 210310.dat  
 Acquired: 2021-03-10 오후 3:38:20  
 4:14:47

Printed: 2021-03-10 오후

Analyst: System

Sample ID: lgw-8-22 chiral (AD H Hx iPrOH (90 10) 1flow 30min 254nm) 210310  
 Injection Volume: 0

Vial: N/A

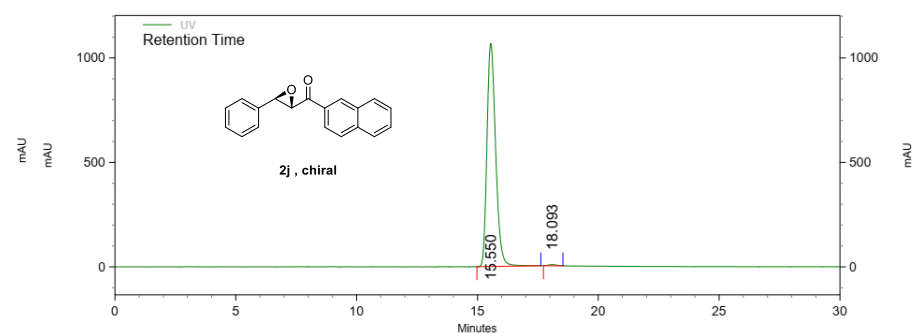

### UV Results

| Name | Retention Time | Area      | Area Percent | Integration Codes |
|------|----------------|-----------|--------------|-------------------|
|      | 15.550         | 106836338 | 99.538       | mm                |
|      | 18.093         | 495984    | 0.462        | MM                |

|        |  |           |         |  |
|--------|--|-----------|---------|--|
| Totals |  | 107332322 | 100.000 |  |
|--------|--|-----------|---------|--|

### Area Percent Report

Page 1 of 1 Data

File: C:\EZChrom Elite\Enterprise\Projects\Default\Data\GWLEE\lgw-7-91 rac (AD H Hx iPrOH (90 10) 1flow 20min 254nm) 210310.dat  
 Acquired: 2021-03-10 오후 4:18:12  
 4:40:10  
 Printed: 2021-03-10 오후

Analyst: System

Sample ID: lgw-7-91 rac (AD H Hx iPrOH (90 10) 1flow 20min 254nm) 210310  
 N/A Injection Volume: 0

Vial:

### Area Percent Report

Page 1 of 1 Data

File: C:\EZChrom Elite\Enterprise\Projects\Default\Data\GWLEE\lgw-8-31 chiral (AD H Hx iPrOH (90 10) 1flow 20min 254nm) 210310.dat  
 Acquired: 2021-03-10 오후 4:41:24  
 5:06:58  
 Printed: 2021-03-10 오후

Analyst: System

Sample ID: lgw-8-31 chiral (AD H Hx iPrOH (90 10) 1flow 20min 254nm) 210310  
 N/A Injection Volume: 0

Vial:

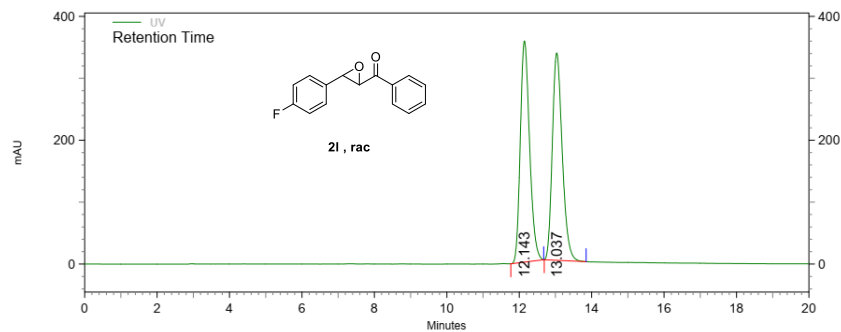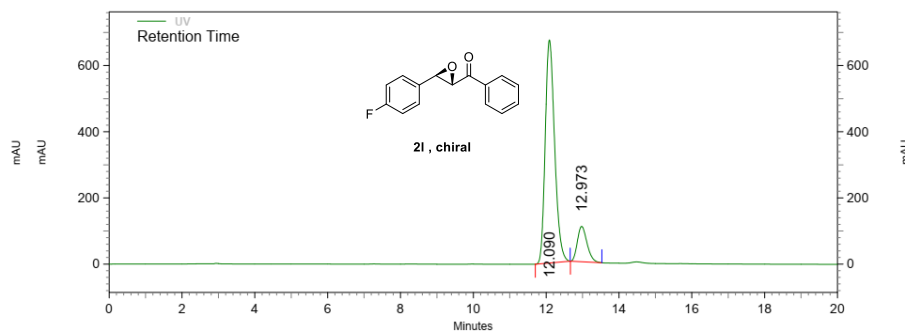

#### UV Results

| Name   | Retention Time | Area     | Area Percent | Integration Codes |
|--------|----------------|----------|--------------|-------------------|
|        | 12.143         | 25429965 | 49.945       | MM                |
|        | 13.037         | 25485919 | 50.055       | MM                |
| Totals |                | 50915884 | 100.000      |                   |

#### UV Results

| Name   | Retention Time | Area     | Area Percent | Integration Codes |
|--------|----------------|----------|--------------|-------------------|
|        | 12.090         | 48393887 | 86.015       | MM                |
|        | 12.973         | 7868428  | 13.985       | MM                |
| Totals |                | 56262315 | 100.000      |                   |

## Area Percent Report

Page 1 of 1 Data

File: C:\EZChrom Elite\Enterprise\Projects\Default\Data\GWLEE\lgw-7-95 rac (AD H Hx iPrOH (95 5) 1flow 30min 254nm) 210312.dat  
 Acquired: 2021-03-12 오후 4:11:49  
 4:46:38

Printed: 2021-03-12 오후

Analyst: System

Sample ID: lgw-7-95 rac (AD H Hx iPrOH (95 5) 1flow 30min 254nm) 210312  
 Injection Volume: 0

Vial: N/A

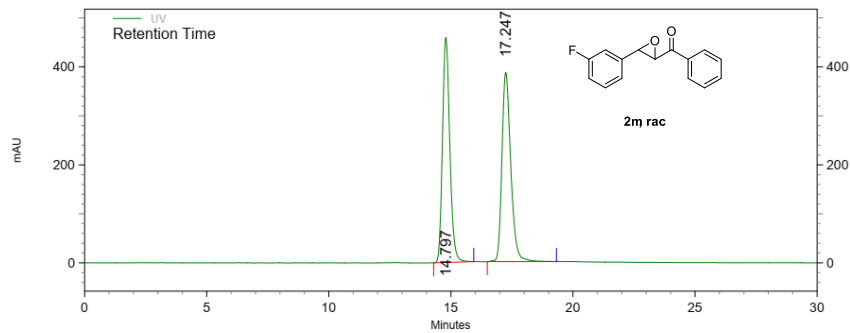

### UV Results

| Name | Retention Time | Area     | Area Percent | Integration Codes |
|------|----------------|----------|--------------|-------------------|
|      | 14.797         | 38404297 | 49.711       | MM                |
|      | 17.247         | 38850056 | 50.289       | MM                |

|        |  |          |         |  |
|--------|--|----------|---------|--|
| Totals |  | 77254353 | 100.000 |  |
|--------|--|----------|---------|--|

## Area Percent Report

Page 1 of 1 Data

File: C:\EZChrom Elite\Enterprise\Projects\Default\Data\GWLEE\lgw-8-36 chiral (AD H Hx iPrOH (95 5) 1flow 30min 254nm) 210312.dat  
 Acquired: 2021-03-12 오후 4:49:56  
 5:20:56

Printed: 2021-03-12 오후

Analyst: System

Sample ID: lgw-8-36 chiral (AD H Hx iPrOH (95 5) 1flow 30min 254nm) 210312  
 Injection Volume: 0

Vial:

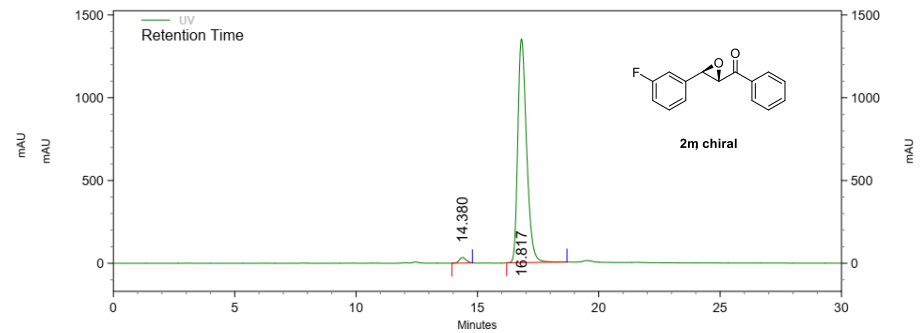

### UV Results

| Name | Retention Time | Area      | Area Percent | Integration Codes |
|------|----------------|-----------|--------------|-------------------|
|      | 14.380         | 2621472   | 1.886        | BI                |
|      | 16.817         | 136342432 | 98.114       | MM                |

|        |  |           |         |  |
|--------|--|-----------|---------|--|
| Totals |  | 138963904 | 100.000 |  |
|--------|--|-----------|---------|--|



## Area Percent Report

Page 1 of 1 Data

File: C:\EZChrom Elite\Enterprise\Projects\Default\Data\GWLEE\lgw-7-94 rac (AS H Hx EtOH (90 0) 1flow 30min 250nm) 210315.dat

Acquired: 2021-03-15 오후 2:08:36  
2:40:29

Printed: 2021-03-15 오후

Analyst: System

Sample ID: lgw-7-94 rac (AS H Hx EtOH (90 0) 1flow 30min 250nm) 210315

Injection Volume: 0

Vial: N/A

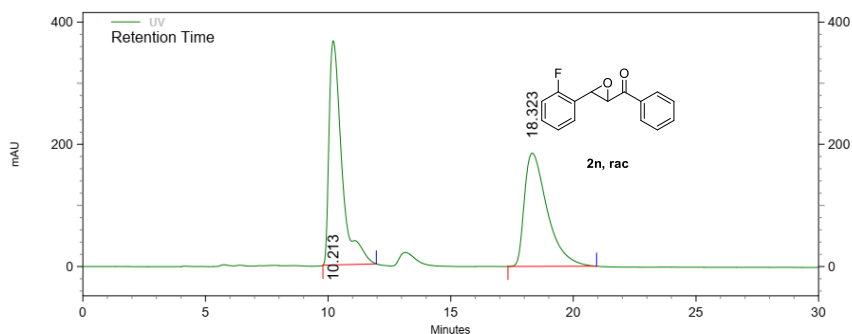

### UV Results

| Name | Retention Time | Area     | Area Percent | Integration Codes |
|------|----------------|----------|--------------|-------------------|
|      | 10.213         | 53156554 | 52.595       | MM                |
|      | 18.323         | 47910389 | 47.405       | MM                |

|        |  |           |         |  |
|--------|--|-----------|---------|--|
| Totals |  | 101066943 | 100.000 |  |
|--------|--|-----------|---------|--|

## Area Percent Report

Page 1 of 1 Data

File: C:\EZChrom Elite\Enterprise\Projects\Default\Data\GWLEE\lgw-8-35 chiral (AS H Hx EtOH (90 0) 1flow 30min 250nm) 210315.dat

Acquired: 2021-03-15 오후 2:42:54  
3:13:50

Printed: 2021-03-15 오후

Analyst: System

Sample ID: lgw-8-35 chiral (AS H Hx EtOH (90 0) 1flow 30min 250nm) 210315

N/A

Injection Volume: 0

Vial:

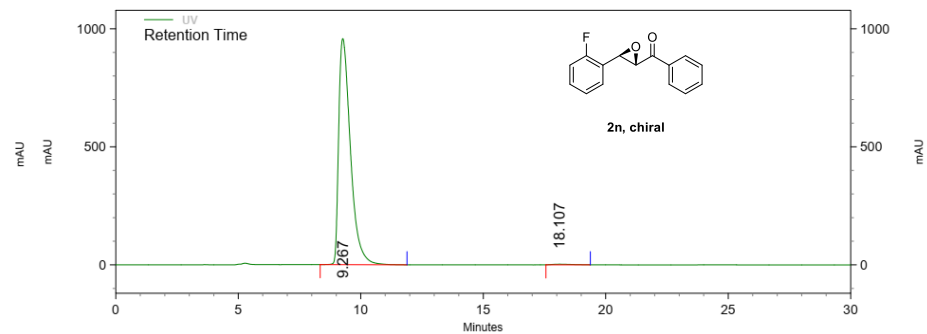

### UV Results

| Name | Retention Time | Area      | Area Percent | Integration Codes |
|------|----------------|-----------|--------------|-------------------|
|      | 9.267          | 127662814 | 99.547       | MM                |
|      | 18.107         | 580923    | 0.453        | MM                |

|        |  |           |         |  |
|--------|--|-----------|---------|--|
| Totals |  | 128243737 | 100.000 |  |
|--------|--|-----------|---------|--|

## Area Percent Report

Page 1 of 1 Data

File: C:\EZChrom Elite\Enterprise\Projects\Default\Data\GWLEE\lgw-11-83 rac(AD H Hx EtOH 99 1 fflow 254nm 30min) 220330.dat

Acquired: 2022-03-30 오후 2:55:59  
3:28:36

Printed: 2022-03-30 오후

Analyst: System

Sample ID: lgw-11-83 rac(AD H Hx EtOH 99 1 fflow 254nm 30min) 220330

Vial: N/A

Injection Volume: 0

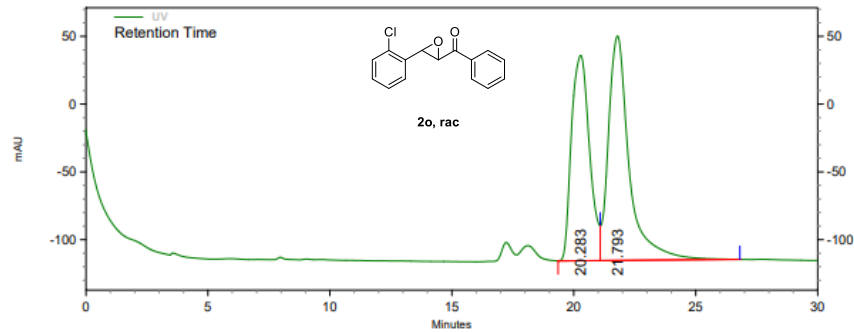

### UV Results

| Name   | Retention Time | Area     | Area Percent | Integration Codes |
|--------|----------------|----------|--------------|-------------------|
|        | 20.283         | 31046592 | 44.228       | BV                |
|        | 21.793         | 39149745 | 55.772       | VI                |
| Totals |                | 70196337 | 100.000      |                   |

## Area Percent Report

Page 1 of 1 Data

File: C:\EZChrom Elite\Enterprise\Projects\Default\Data\GWLEE\lgw-12-2 chiral(AD H Hx EtOH 99 1 fflow 254nm 30min) 220330.dat

Acquired: 2022-03-30 오후 2:23:04  
2:54:34

Printed: 2022-03-30 오후

Analyst: System

Sample ID: lgw-12-2 chiral(AD H Hx EtOH 99 1 fflow 254nm 30min) 220330

Vial: N/A

Injection Volume: 0

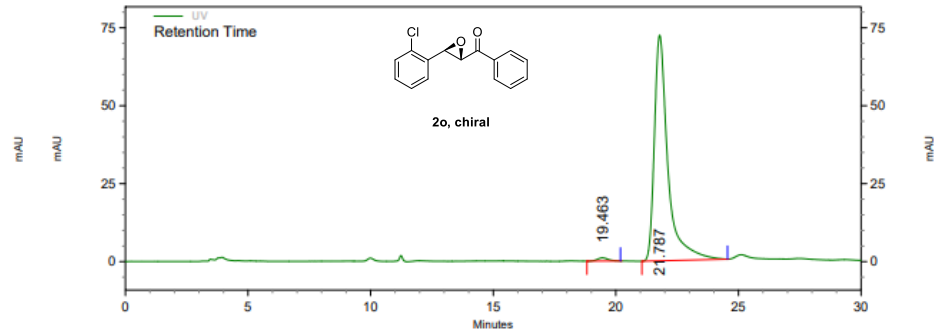

### UV Results

| Name   | Retention Time | Area     | Area Percent | Integration Codes |
|--------|----------------|----------|--------------|-------------------|
|        | 19.463         | 125030   | 1.116        | BI                |
|        | 21.787         | 11081332 | 98.884       | BB                |
| Totals |                | 11206362 | 100.000      |                   |

## Area Percent Report

Page 1 of 1 Data  
 File: C:\EZChrom Elite\Enterprise\Projects\Default\Data\GWLEE\lgw-12-46 rac ADH Hx IPrOH 99 1 254nm 1flow 220413.dat  
 Acquired: 2022-04-13 오후 2:39:44  
 3:20:57

Printed: 2022-04-13 오후

Analyst: System

Sample ID: lgw-12-46 rac ADH Hx IPrOH 99 1 254nm 1flow 220413  
 Injection Volume: 0

Vial: N/A

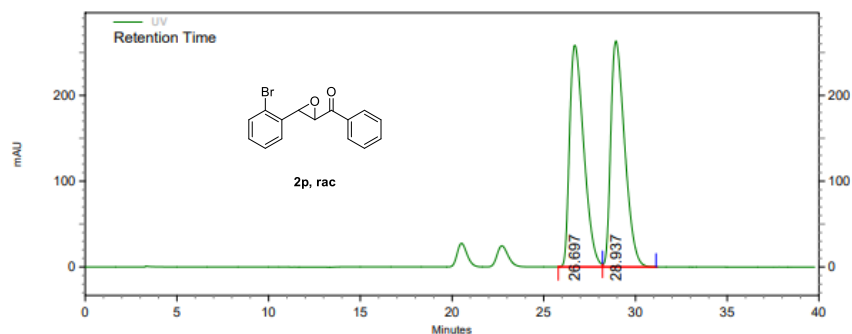

### UV Results

| Name | Retention Time | Area     | Area Percent | Integration Codes |
|------|----------------|----------|--------------|-------------------|
|      | 26.697         | 55528402 | 49.920       | IV                |
|      | 28.937         | 55705559 | 50.080       | VI                |

|        |  |           |         |  |
|--------|--|-----------|---------|--|
| Totals |  | 111233961 | 100.000 |  |
|--------|--|-----------|---------|--|

## Area Percent Report

Page 1 of 1 Data  
 File: C:\EZChrom Elite\Enterprise\Projects\Default\Data\GWLEE\lgw-12-46 chiral ADH Hx IPrOH 99 1 254nm 1flow 220413.dat  
 Acquired: 2022-04-13 오후 3:21:53  
 4:12:49

Printed: 2022-04-13 오후

Analyst: System

Sample ID: lgw-12-46 chiral ADH Hx IPrOH 99 1 254nm 1flow 220413  
 Injection Volume: 0

Vial: N/A

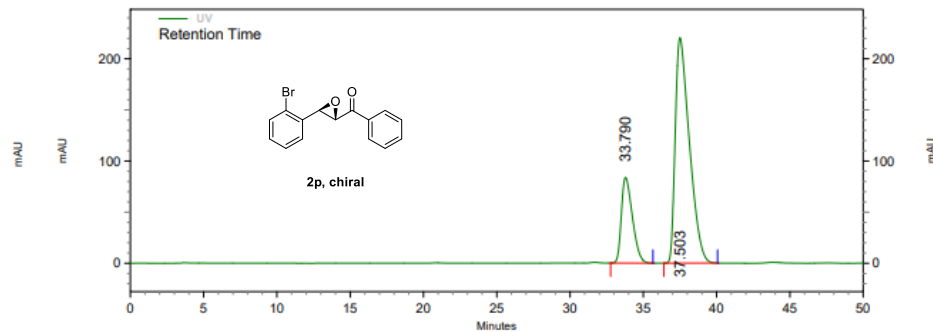

### UV Results

| Name | Retention Time | Area     | Area Percent | Integration Codes |
|------|----------------|----------|--------------|-------------------|
|      | 33.790         | 17497647 | 22.830       | II                |
|      | 37.503         | 59144444 | 77.170       | BI                |

|        |  |          |         |  |
|--------|--|----------|---------|--|
| Totals |  | 76642091 | 100.000 |  |
|--------|--|----------|---------|--|

## Area Percent Report

Page 1 of 1 Data

File: C:\EZChrom Elite\Enterprise\Projects\Default\Data\GWLEE\lgw 7-97 rac (OD-H Hx iPrOH 90 10 1flow 30min 250nm) 211026.dat

Acquired: 2021-10-26 오후 11:12:16  
11:35:12

Printed: 2021-10-26 오후

Analyst: System

Sample ID: lgw 7-97 rac (OD-H Hx iPrOH 90 10 1flow 30min 250nm) 211026

Injection Volume: 0

Vial: N/A

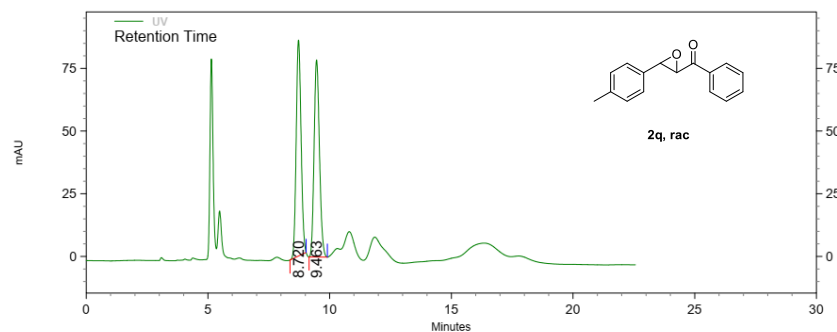

### UV Results

| Name | Retention Time | Area    | Area Percent | Integration Codes |
|------|----------------|---------|--------------|-------------------|
|      | 8.720          | 4786046 | 49.826       | MM                |
|      | 9.463          | 4819490 | 50.174       | MM                |

|        |  |         |         |  |
|--------|--|---------|---------|--|
| Totals |  | 9605536 | 100.000 |  |
|--------|--|---------|---------|--|

## Area Percent Report

Page 1 of 1 Data

File: C:\EZChrom Elite\Enterprise\Projects\Default\Data\GWLEE\lgw 9-83 1\_4Me (OD-H Hx iPrOH 90 10 1flow 30min 250nm) 211026.dat

Acquired: 2021-10-26 오후 11:57:36  
12:10:49

Printed: 2021-10-27 오전

Analyst: System

Sample ID: lgw 9-83 1\_4Me (OD-H Hx iPrOH 90 10 1flow 30min 250nm) 211026

N/A

Injection Volume: 0

Vial:

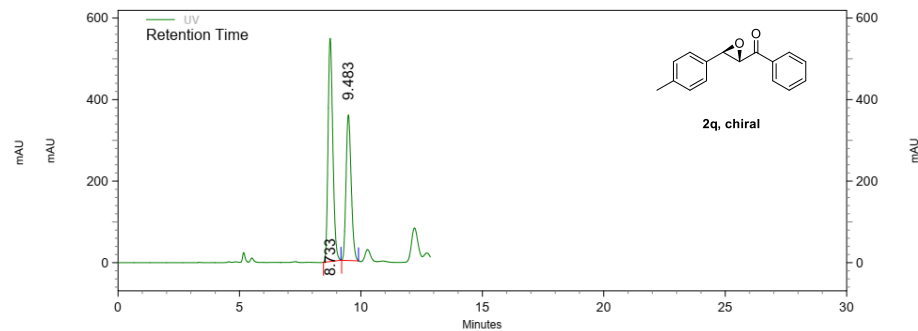

### UV Results

| Name | Retention Time | Area     | Area Percent | Integration Codes |
|------|----------------|----------|--------------|-------------------|
|      | 8.733          | 29878968 | 58.620       | MM                |
|      | 9.483          | 21091470 | 41.380       | MM                |

|        |  |          |         |  |
|--------|--|----------|---------|--|
| Totals |  | 50970438 | 100.000 |  |
|--------|--|----------|---------|--|

## Area Percent Report

Page 1 of 1 Data

File: C:\EZChrom Elite\Enterprise\Projects\Default\Data\GWLEE\lgw 7-96 rac (OD-H Hx iPrOH 90 10 05flow 30min 250nm) 211026.dat  
 Acquired: 2021-10-27 오전 12:36:04  
 12:57:33

Printed: 2021-10-27 오전

Analyst: System

Sample ID: lgw 7-96 rac (OD-H Hx iPrOH 90 10 05flow 30min 250nm) 211026  
 Injection Volume: 0

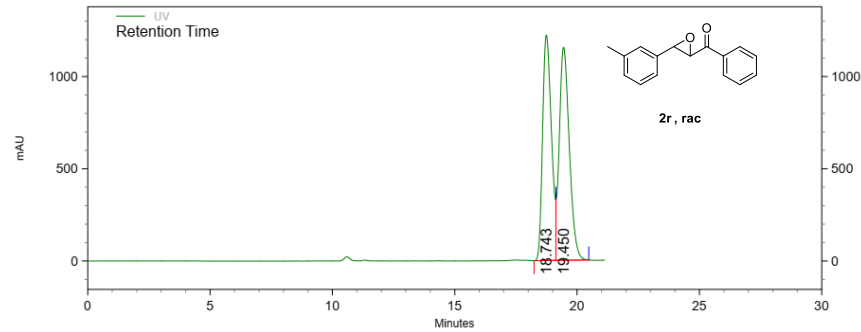

### UV Results

| Name | Retention Time | Area      | Area Percent | Integration Codes |
|------|----------------|-----------|--------------|-------------------|
|      | 18.743         | 122243995 | 48.096       | Mx                |
|      | 19.450         | 131920227 | 51.904       | xM                |

|        |  |           |         |  |
|--------|--|-----------|---------|--|
| Totals |  | 254164222 | 100.000 |  |
|--------|--|-----------|---------|--|

## Area Percent Report

Page 1 of 1 Data

File: C:\EZChrom Elite\Enterprise\Projects\Default\Data\GWLEE\lgw 10- 1\_4Me (OD-H Hx iPrOH 90 10 05flow 30min 250nm) 211026.dat  
 Acquired: 2021-10-27 오전 12:59:09  
 1:22:11

Printed: 2021-10-27 오전

Analyst: System

Vial: N/A Sample ID: lgw 10- 1\_4Me (OD-H Hx iPrOH 90 10 05flow 30min 250nm) 211026  
 Injection Volume: 0

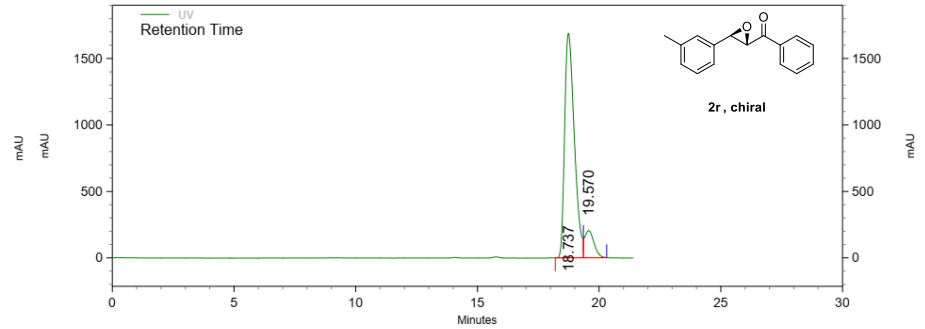

### UV Results

| Name | Retention Time | Area      | Area Percent | Integration Codes |
|------|----------------|-----------|--------------|-------------------|
|      | 18.737         | 186426011 | 89.534       | Mx                |
|      | 19.570         | 21792824  | 10.466       | xM                |

|        |  |           |         |  |
|--------|--|-----------|---------|--|
| Totals |  | 208218835 | 100.000 |  |
|--------|--|-----------|---------|--|

## Area Percent Report

Page 1 of 1 Data  
 File: C:\EZChrom Elite\Enterprise\Projects\Default\Data\GWLEE\lgw-11-85 rac (OJ-H Hx i-Pr 90 10 254nm 30min) 220328.dat  
 Acquired: 2022-03-28 오후 1:26:38  
 2:03:45  
 Printed: 2022-03-28 오후

Analyst: System

Sample ID: lgw-11-85 rac (OJ-H Hx i-Pr 90 10 254nm 30min) 220328  
 Injection Volume: 0

Vial: N/A

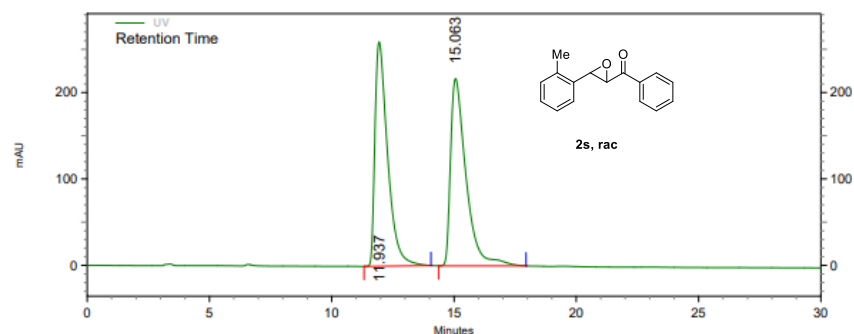

### UV Results

| Name | Retention Time | Area     | Area Percent | Integration Codes |
|------|----------------|----------|--------------|-------------------|
|      | 11.937         | 37380107 | 49.502       | MM                |
|      | 15.063         | 38132454 | 50.498       | MM                |

|        |  |          |         |  |
|--------|--|----------|---------|--|
| Totals |  | 75512561 | 100.000 |  |
|--------|--|----------|---------|--|

## Area Percent Report

Page 1 of 1 Data  
 File: C:\EZChrom Elite\Enterprise\Projects\Default\Data\GWLEE\lgw-12-3 chiral(OJ H Hx EtOH 90 10 1flow 254nm 30min) 220330.dat  
 Acquired: 2022-03-30 오후 3:45:40  
 4:15:53  
 Printed: 2022-03-30 오후

Analyst: System

Sample ID: lgw-12-3 chiral(OJ H Hx EtOH 90 10 1flow 254nm 30min) 220330  
 Injection Volume: 0

Vial: N/A

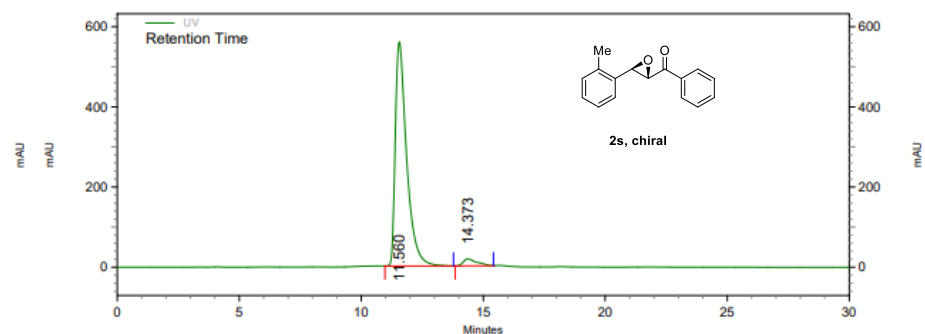

### UV Results

| Name | Retention Time | Area     | Area Percent | Integration Codes |
|------|----------------|----------|--------------|-------------------|
|      | 11.560         | 72224032 | 96.384       | MM                |
|      | 14.373         | 2709767  | 3.616        | MM                |

|        |  |          |         |  |
|--------|--|----------|---------|--|
| Totals |  | 74933799 | 100.000 |  |
|--------|--|----------|---------|--|

### Area Percent Report

Page 1 of 1 Data  
 File: C:\EZChrom Elite\Enterprise\Projects\Default\Data\GWLEE\lgw-12-24 rac(OD-H Hx i-PrOH (90 10) 1flow 30min 254nm) 220406.dat  
 Acquired: 2022-04-06 오전 11:18:51  
 11:49:15

Printed: 2022-04-06 오전

Analyst: System

Sample ID: lgw-12-24 rac(OD-H Hx i-PrOH (90 10) 1flow 30min 254nm) 220406  
 N/A Injection Volume: 0

Vial:

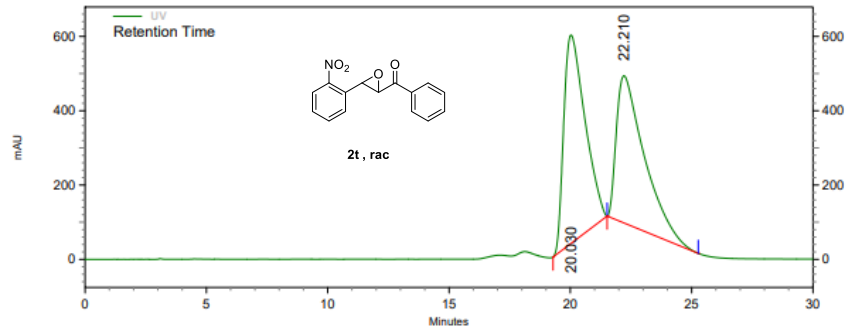

#### UV Results

| Name | Retention Time | Area      | Area Percent | Integration Codes |
|------|----------------|-----------|--------------|-------------------|
|      | 20.030         | 135609117 | 51.491       | MM                |
|      | 22.210         | 127755077 | 48.509       | MM                |

|        |  |           |         |  |
|--------|--|-----------|---------|--|
| Totals |  | 263364194 | 100.000 |  |
|--------|--|-----------|---------|--|

### Area Percent Report

Page 1 of 1 Data  
 File: C:\EZChrom Elite\Enterprise\Projects\Default\Data\GWLEE\lgw-12-25 chiral(OD-H Hx i-PrOH (90 10) 1flow 30min 254nm) 220406.dat  
 Acquired: 2022-04-06 오전 11:50:44  
 12:20:58

Printed: 2022-04-06 오후

Analyst: System

Sample ID: lgw-12-25 chiral(OD-H Hx i-PrOH (90 10) 1flow 30min 254nm) 220406  
 N/A Injection Volume: 0

Vial:

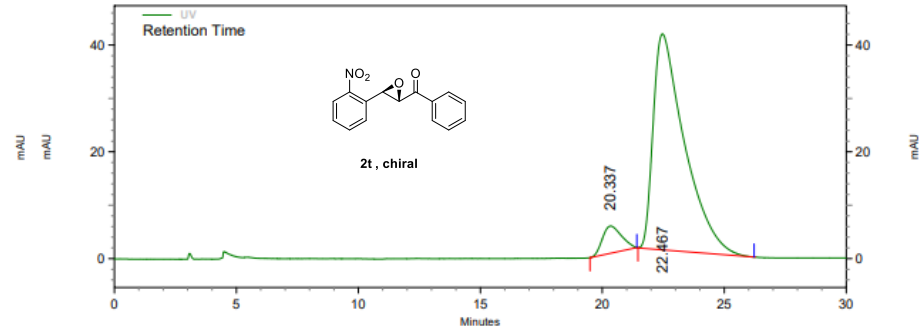

#### UV Results

| Name | Retention Time | Area     | Area Percent | Integration Codes |
|------|----------------|----------|--------------|-------------------|
|      | 20.337         | 1103271  | 7.093        | MM                |
|      | 22.467         | 14450583 | 92.907       | MM                |

|        |  |          |         |  |
|--------|--|----------|---------|--|
| Totals |  | 15553854 | 100.000 |  |
|--------|--|----------|---------|--|
